# Supplementary material
Source: publisher site journal article supplement (https://www.dovepress.com/article/420614)
Supplement: Supplementary file 1 [file get_supplementary_file.php]

**Supplementary Table 1 291 PMRGs obtained from the GeneCards database.**

| Gene Symbol | Description                                                        | Category       | Gifts | GC Id       | Relevance score | GeneCards Link                                                                                                                      |
|-------------|--------------------------------------------------------------------|----------------|-------|-------------|-----------------|-------------------------------------------------------------------------------------------------------------------------------------|
| PCCB        | Propionyl-CoA Carboxylase Subunit Beta                             | Protein Coding | 53    | GC03P136250 | 61.11257935     | <a href="https://www.genecards.org/cgi-bin/carddisp.pl?gene=PCCB">https://www.genecards.org/cgi-bin/carddisp.pl?gene=PCCB</a>       |
| PCCA        | Propionyl-CoA Carboxylase Subunit Alpha                            | Protein Coding | 53    | GC13P100089 | 56.12726974     | <a href="https://www.genecards.org/cgi-bin/carddisp.pl?gene=PCCA">https://www.genecards.org/cgi-bin/carddisp.pl?gene=PCCA</a>       |
| MMACHC      | Metabolism Of Cobalamin Associated C                               | Protein Coding | 50    | GC01P045500 | 47.25754929     | <a href="https://www.genecards.org/cgi-bin/carddisp.pl?gene=MMACHC">https://www.genecards.org/cgi-bin/carddisp.pl?gene=MMACHC</a>   |
| MTR         | 5-Methyltetrahydrofolate-Homocysteine Methyltransferase            | Protein Coding | 54    | GC01P236795 | 39.33602524     | <a href="https://www.genecards.org/cgi-bin/carddisp.pl?gene=MTR">https://www.genecards.org/cgi-bin/carddisp.pl?gene=MTR</a>         |
| CYP2D6      | Cytochrome P450 Family 2 Subfamily D Member 6                      | Protein Coding | 53    | GC22M042126 | 39.22632217     | <a href="https://www.genecards.org/cgi-bin/carddisp.pl?gene=CYP2D6">https://www.genecards.org/cgi-bin/carddisp.pl?gene=CYP2D6</a>   |
| MMADHC      | Metabolism Of Cobalamin Associated D                               | Protein Coding | 49    | GC02M149569 | 35.76113892     | <a href="https://www.genecards.org/cgi-bin/carddisp.pl?gene=MMADHC">https://www.genecards.org/cgi-bin/carddisp.pl?gene=MMADHC</a>   |
| CYP3A4      | Cytochrome P450 Family 3 Subfamily A Member 4                      | Protein Coding | 56    | GC07M099759 | 35.6474762      | <a href="https://www.genecards.org/cgi-bin/carddisp.pl?gene=CYP3A4">https://www.genecards.org/cgi-bin/carddisp.pl?gene=CYP3A4</a>   |
| CYP2C19     | Cytochrome P450 Family 2 Subfamily C Member 19                     | Protein Coding | 52    | GC10P094762 | 34.64389801     | <a href="https://www.genecards.org/cgi-bin/carddisp.pl?gene=CYP2C19">https://www.genecards.org/cgi-bin/carddisp.pl?gene=CYP2C19</a> |
| INS         | Insulin                                                            | Protein Coding | 55    | GC11M002159 | 33.82258224     | <a href="https://www.genecards.org/cgi-bin/carddisp.pl?gene=INS">https://www.genecards.org/cgi-bin/carddisp.pl?gene=INS</a>         |
| MMUT        | Methylmalonyl-CoA Mutase                                           | Protein Coding | 52    | GC06M049430 | 31.02311325     | <a href="https://www.genecards.org/cgi-bin/carddisp.pl?gene=MMUT">https://www.genecards.org/cgi-bin/carddisp.pl?gene=MMUT</a>       |
| ABCA3       | ATP Binding Cassette Subfamily A Member 3                          | Protein Coding | 55    | GC16M002275 | 30.44045639     | <a href="https://www.genecards.org/cgi-bin/carddisp.pl?gene=ABCA3">https://www.genecards.org/cgi-bin/carddisp.pl?gene=ABCA3</a>     |
| MMAA        | Metabolism Of Cobalamin Associated A                               | Protein Coding | 47    | GC04P145610 | 30.1062355      | <a href="https://www.genecards.org/cgi-bin/carddisp.pl?gene=MMAA">https://www.genecards.org/cgi-bin/carddisp.pl?gene=MMAA</a>       |
| UQCRFS1     | Ubiquinol-Cytochrome C Reductase, Rieske Iron-Sulfur Polypeptide 1 | Protein Coding | 53    | GC19M029205 | 30.09693146     | <a href="https://www.genecards.org/cgi-bin/carddisp.pl?gene=UQCRFS1">https://www.genecards.org/cgi-bin/carddisp.pl?gene=UQCRFS1</a> |
| ACADM       | Acyl-CoA Dehydrogenase Medium Chain                                | Protein Coding | 52    | GC01P075724 | 29.86544609     | <a href="https://www.genecards.org/cgi-bin/carddisp.pl?gene=ACADM">https://www.genecards.org/cgi-bin/carddisp.pl?gene=ACADM</a>     |

|        |                                                                   |                |    |             |             |                                                                                                                                             |
|--------|-------------------------------------------------------------------|----------------|----|-------------|-------------|---------------------------------------------------------------------------------------------------------------------------------------------|
| PPARG  | Peroxisome Proliferator Activated Receptor Gamma                  | Protein Coding | 60 | GC03P012287 | 29.00304985 | ne=ACADM<br><a href="https://www.genecards.org/cgi-bin/carddisp.pl?gene=PPARG">https://www.genecards.org/cgi-bin/carddisp.pl?gene=PPARG</a> |
| MTRR   | 5-Methyltetrahydrofolate-Homocysteine Methyltransferase Reductase | Protein Coding | 50 | GC05P007851 | 28.36356544 | <a href="https://www.genecards.org/cgi-bin/carddisp.pl?gene=MTRR">https://www.genecards.org/cgi-bin/carddisp.pl?gene=MTRR</a>               |
| LEP    | Leptin                                                            | Protein Coding | 53 | GC07P128241 | 28.21476173 | <a href="https://www.genecards.org/cgi-bin/carddisp.pl?gene=LEP">https://www.genecards.org/cgi-bin/carddisp.pl?gene=LEP</a>                 |
| MMAB   | Metabolism Of Cobalamin Associated B                              | Protein Coding | 51 | GC12M109553 | 28.03660583 | <a href="https://www.genecards.org/cgi-bin/carddisp.pl?gene=MMAB">https://www.genecards.org/cgi-bin/carddisp.pl?gene=MMAB</a>               |
| OTC    | Ornithine Transcarbamylase                                        | Protein Coding | 52 | GC0XP038353 | 26.92333984 | <a href="https://www.genecards.org/cgi-bin/carddisp.pl?gene=OTC">https://www.genecards.org/cgi-bin/carddisp.pl?gene=OTC</a>                 |
| CYP2C9 | Cytochrome P450 Family 2 Subfamily C Member 9                     | Protein Coding | 53 | GC10P094938 | 25.8538208  | <a href="https://www.genecards.org/cgi-bin/carddisp.pl?gene=CYP2C9">https://www.genecards.org/cgi-bin/carddisp.pl?gene=CYP2C9</a>           |
| LDLR   | Low Density Lipoprotein Receptor                                  | Protein Coding | 58 | GC19P011091 | 25.81306458 | <a href="https://www.genecards.org/cgi-bin/carddisp.pl?gene=LDLR">https://www.genecards.org/cgi-bin/carddisp.pl?gene=LDLR</a>               |
| ALB    | Albumin                                                           | Protein Coding | 56 | GC04P073397 | 25.16794777 | <a href="https://www.genecards.org/cgi-bin/carddisp.pl?gene=ALB">https://www.genecards.org/cgi-bin/carddisp.pl?gene=ALB</a>                 |
| CYP2C8 | Cytochrome P450 Family 2 Subfamily C Member 8                     | Protein Coding | 52 | GC10M095038 | 25.04213715 | <a href="https://www.genecards.org/cgi-bin/carddisp.pl?gene=CYP2C8">https://www.genecards.org/cgi-bin/carddisp.pl?gene=CYP2C8</a>           |
| APOE   | Apolipoprotein E                                                  | Protein Coding | 57 | GC19P073055 | 24.89061928 | <a href="https://www.genecards.org/cgi-bin/carddisp.pl?gene=APOE">https://www.genecards.org/cgi-bin/carddisp.pl?gene=APOE</a>               |
| ADIPOQ | Adiponectin, C1Q And Collagen Domain Containing                   | Protein Coding | 52 | GC03P186842 | 24.75322914 | <a href="https://www.genecards.org/cgi-bin/carddisp.pl?gene=ADIPOQ">https://www.genecards.org/cgi-bin/carddisp.pl?gene=ADIPOQ</a>           |
| CYP1A2 | Cytochrome P450 Family 1 Subfamily A Member 2                     | Protein Coding | 52 | GC15P074748 | 24.42164421 | <a href="https://www.genecards.org/cgi-bin/carddisp.pl?gene=CYP1A2">https://www.genecards.org/cgi-bin/carddisp.pl?gene=CYP1A2</a>           |
| IL6    | Interleukin 6                                                     | Protein Coding | 58 | GC07P022725 | 24.29815102 | <a href="https://www.genecards.org/cgi-bin/carddisp.pl?gene=IL6">https://www.genecards.org/cgi-bin/carddisp.pl?gene=IL6</a>                 |
| LIPC   | Lipase C, Hepatic Type                                            | Protein Coding | 52 | GC15P058410 | 24.07993889 | <a href="https://www.genecards.org/cgi-bin/carddisp.pl?gene=LIPC">https://www.genecards.org/cgi-bin/carddisp.pl?gene=LIPC</a>               |
| LPL    | Lipoprotein Lipase                                                | Protein Coding | 56 | GC08P019901 | 23.63115692 | <a href="https://www.genecards.org/cgi-bin/carddisp.pl?gene=LPL">https://www.genecards.org/cgi-bin/carddisp.pl?gene=LPL</a>                 |

|        |                                                    |                |    |             |             |                                                                                                                                   |
|--------|----------------------------------------------------|----------------|----|-------------|-------------|-----------------------------------------------------------------------------------------------------------------------------------|
| APOB   | Apolipoprotein B                                   | Protein Coding | 53 | GC02M020956 | 23.32738113 | <a href="https://www.genecards.org/cgi-bin/carddisp.pl?gene=APOB">https://www.genecards.org/cgi-bin/carddisp.pl?gene=APOB</a>     |
| UGT1A1 | UDP Glucuronosyltransferase Family 1 Member A1     | Protein Coding | 57 | GC02P233760 | 23.1049614  | <a href="https://www.genecards.org/cgi-bin/carddisp.pl?gene=UGT1A1">https://www.genecards.org/cgi-bin/carddisp.pl?gene=UGT1A1</a> |
| CYP1A1 | Cytochrome P450 Family 1 Subfamily A Member 1      | Protein Coding | 55 | GC15M074719 | 23.08771324 | <a href="https://www.genecards.org/cgi-bin/carddisp.pl?gene=CYP1A1">https://www.genecards.org/cgi-bin/carddisp.pl?gene=CYP1A1</a> |
| GCDH   | Glutaryl-CoA Dehydrogenase                         | Protein Coding | 52 | GC19P012891 | 23.0321064  | <a href="https://www.genecards.org/cgi-bin/carddisp.pl?gene=GCDH">https://www.genecards.org/cgi-bin/carddisp.pl?gene=GCDH</a>     |
| PPARA  | Peroxisome Proliferator Activated Receptor Alpha   | Protein Coding | 51 | GC22P046150 | 22.84316635 | <a href="https://www.genecards.org/cgi-bin/carddisp.pl?gene=PPARA">https://www.genecards.org/cgi-bin/carddisp.pl?gene=PPARA</a>   |
| CYP2B6 | Cytochrome P450 Family 2 Subfamily B Member 6      | Protein Coding | 52 | GC19P040991 | 22.70144463 | <a href="https://www.genecards.org/cgi-bin/carddisp.pl?gene=CYP2B6">https://www.genecards.org/cgi-bin/carddisp.pl?gene=CYP2B6</a> |
| IGF1   | Insulin Like Growth Factor 1                       | Protein Coding | 55 | GC12M102395 | 22.66413879 | <a href="https://www.genecards.org/cgi-bin/carddisp.pl?gene=IGF1">https://www.genecards.org/cgi-bin/carddisp.pl?gene=IGF1</a>     |
| CYP2A6 | Cytochrome P450 Family 2 Subfamily A Member 6      | Protein Coding | 53 | GC19M040843 | 22.56680679 | <a href="https://www.genecards.org/cgi-bin/carddisp.pl?gene=CYP2A6">https://www.genecards.org/cgi-bin/carddisp.pl?gene=CYP2A6</a> |
| TPMT   | Thiopurine S-Methyltransferase                     | Protein Coding | 53 | GC06M018128 | 22.38929176 | <a href="https://www.genecards.org/cgi-bin/carddisp.pl?gene=TPMT">https://www.genecards.org/cgi-bin/carddisp.pl?gene=TPMT</a>     |
| CBS    | Cystathionine Beta-Synthase                        | Protein Coding | 56 | GC21M043053 | 22.33657455 | <a href="https://www.genecards.org/cgi-bin/carddisp.pl?gene=CBS">https://www.genecards.org/cgi-bin/carddisp.pl?gene=CBS</a>       |
| TNF    | Tumor Necrosis Factor                              | Protein Coding | 59 | GC06P092154 | 21.97315598 | <a href="https://www.genecards.org/cgi-bin/carddisp.pl?gene=TNF">https://www.genecards.org/cgi-bin/carddisp.pl?gene=TNF</a>       |
| HMGCL  | 3-Hydroxy-3-Methylglutaryl-CoA Lyase               | Protein Coding | 51 | GC01M023801 | 21.91726685 | <a href="https://www.genecards.org/cgi-bin/carddisp.pl?gene=HMGCL">https://www.genecards.org/cgi-bin/carddisp.pl?gene=HMGCL</a>   |
| CYP2E1 | Cytochrome P450 Family 2 Subfamily E Member 1      | Protein Coding | 52 | GC10P133520 | 21.77449989 | <a href="https://www.genecards.org/cgi-bin/carddisp.pl?gene=CYP2E1">https://www.genecards.org/cgi-bin/carddisp.pl?gene=CYP2E1</a> |
| CSF2RA | Colony Stimulating Factor 2 Receptor Subunit Alpha | Protein Coding | 52 | GC0XP001845 | 21.42407227 | <a href="https://www.genecards.org/cgi-bin/carddisp.pl?gene=CSF2RA">https://www.genecards.org/cgi-bin/carddisp.pl?gene=CSF2RA</a> |
| PAH    | Phenylalanine Hydroxylase                          | Protein Coding | 55 | GC12M102836 | 21.21108818 | <a href="https://www.genecards.org/cgi-bin/carddisp.pl?gene=PAH">https://www.genecards.org/cgi-bin/carddisp.pl?gene=PAH</a>       |

|        |                                                                               |                |    |             |             |                                                                                                                                   |
|--------|-------------------------------------------------------------------------------|----------------|----|-------------|-------------|-----------------------------------------------------------------------------------------------------------------------------------|
| CYP3A5 | Cytochrome P450 Family 3 Subfamily A Member 5                                 | Protein Coding | 51 | GC07M099648 | 21.14499283 | <a href="https://www.genecards.org/cgi-bin/carddisp.pl?gene=CYP3A5">https://www.genecards.org/cgi-bin/carddisp.pl?gene=CYP3A5</a> |
| BTD    | Biotinidase                                                                   | Protein Coding | 52 | GC03P017386 | 21.06881714 | <a href="https://www.genecards.org/cgi-bin/carddisp.pl?gene=BTD">https://www.genecards.org/cgi-bin/carddisp.pl?gene=BTD</a>       |
| GHRL   | Ghrelin And Obestatin Prepropeptide                                           | Protein Coding | 49 | GC03M010285 | 20.99878693 | <a href="https://www.genecards.org/cgi-bin/carddisp.pl?gene=GHRL">https://www.genecards.org/cgi-bin/carddisp.pl?gene=GHRL</a>     |
| SFTPB  | Surfactant Protein B                                                          | Protein Coding | 51 | GC02M085657 | 20.57275009 | <a href="https://www.genecards.org/cgi-bin/carddisp.pl?gene=SFTPB">https://www.genecards.org/cgi-bin/carddisp.pl?gene=SFTPB</a>   |
| ACADVL | Acyl-CoA Dehydrogenase Very Long Chain                                        | Protein Coding | 51 | GC17P007219 | 20.4634285  | <a href="https://www.genecards.org/cgi-bin/carddisp.pl?gene=ACADVL">https://www.genecards.org/cgi-bin/carddisp.pl?gene=ACADVL</a> |
| CPT2   | Carnitine Palmitoyltransferase 2                                              | Protein Coding | 56 | GC01P053196 | 20.11322403 | <a href="https://www.genecards.org/cgi-bin/carddisp.pl?gene=CPT2">https://www.genecards.org/cgi-bin/carddisp.pl?gene=CPT2</a>     |
| HADHA  | Hydroxyacyl-CoA Dehydrogenase Trifunctional Multienzyme Complex Subunit Alpha | Protein Coding | 52 | GC02M026190 | 20.02347183 | <a href="https://www.genecards.org/cgi-bin/carddisp.pl?gene=HADHA">https://www.genecards.org/cgi-bin/carddisp.pl?gene=HADHA</a>   |
| ETFDH  | Electron Transfer Flavoprotein Dehydrogenase                                  | Protein Coding | 52 | GC04P158672 | 19.88984299 | <a href="https://www.genecards.org/cgi-bin/carddisp.pl?gene=ETFDH">https://www.genecards.org/cgi-bin/carddisp.pl?gene=ETFDH</a>   |
| ACADS  | Acyl-CoA Dehydrogenase Short Chain                                            | Protein Coding | 52 | GC12P126959 | 19.86980438 | <a href="https://www.genecards.org/cgi-bin/carddisp.pl?gene=ACADS">https://www.genecards.org/cgi-bin/carddisp.pl?gene=ACADS</a>   |
| PC     | Pyruvate Carboxylase                                                          | Protein Coding | 53 | GC11M066848 | 19.85100937 | <a href="https://www.genecards.org/cgi-bin/carddisp.pl?gene=PC">https://www.genecards.org/cgi-bin/carddisp.pl?gene=PC</a>         |
| ADSL   | Adenylosuccinate Lyase                                                        | Protein Coding | 54 | GC22P040346 | 19.84980774 | <a href="https://www.genecards.org/cgi-bin/carddisp.pl?gene=ADSL">https://www.genecards.org/cgi-bin/carddisp.pl?gene=ADSL</a>     |
| CRP    | C-Reactive Protein                                                            | Protein Coding | 53 | GC01M159729 | 19.67492294 | <a href="https://www.genecards.org/cgi-bin/carddisp.pl?gene=CRP">https://www.genecards.org/cgi-bin/carddisp.pl?gene=CRP</a>       |
| GGT1   | Gamma-Glutamyltransferase 1                                                   | Protein Coding | 56 | GC22P024583 | 19.48277092 | <a href="https://www.genecards.org/cgi-bin/carddisp.pl?gene=GGT1">https://www.genecards.org/cgi-bin/carddisp.pl?gene=GGT1</a>     |
| NR3C1  | Nuclear Receptor Subfamily 3 Group C Member 1                                 | Protein Coding | 56 | GC05M143277 | 19.25010681 | <a href="https://www.genecards.org/cgi-bin/carddisp.pl?gene=NR3C1">https://www.genecards.org/cgi-bin/carddisp.pl?gene=NR3C1</a>   |
| BGLAP  | Bone Gamma-Carboxyglutamate Protein                                           | Protein Coding | 46 | GC01P156242 | 18.94005585 | <a href="https://www.genecards.org/cgi-bin/carddisp.pl?gene=BGLAP">https://www.genecards.org/cgi-bin/carddisp.pl?gene=BGLAP</a>   |

|        |                                                        |                |    |             |             |                                                                                                                                   |
|--------|--------------------------------------------------------|----------------|----|-------------|-------------|-----------------------------------------------------------------------------------------------------------------------------------|
| INSR   | Insulin Receptor                                       | Protein Coding | 60 | GC19M007112 | 18.79404449 | <a href="https://www.genecards.org/cgi-bin/carddisp.pl?gene=INSR">https://www.genecards.org/cgi-bin/carddisp.pl?gene=INSR</a>     |
| CPT1A  | Carnitine Palmitoyltransferase 1A                      | Protein Coding | 55 | GC11M068754 | 18.33993149 | <a href="https://www.genecards.org/cgi-bin/carddisp.pl?gene=CPT1A">https://www.genecards.org/cgi-bin/carddisp.pl?gene=CPT1A</a>   |
| APOA1  | Apolipoprotein A1                                      | Protein Coding | 57 | GC11M116835 | 18.12685776 | <a href="https://www.genecards.org/cgi-bin/carddisp.pl?gene=APOA1">https://www.genecards.org/cgi-bin/carddisp.pl?gene=APOA1</a>   |
| BCKDHB | Branched Chain Keto Acid Dehydrogenase E1 Subunit Beta | Protein Coding | 50 | GC06P080106 | 18.03951263 | <a href="https://www.genecards.org/cgi-bin/carddisp.pl?gene=BCKDHB">https://www.genecards.org/cgi-bin/carddisp.pl?gene=BCKDHB</a> |
| AKT1   | AKT Serine/Threonine Kinase 1                          | Protein Coding | 61 | GC14M104769 | 17.96221733 | <a href="https://www.genecards.org/cgi-bin/carddisp.pl?gene=AKT1">https://www.genecards.org/cgi-bin/carddisp.pl?gene=AKT1</a>     |
| TP53   | Tumor Protein P53                                      | Protein Coding | 60 | GC17M007661 | 17.83651924 | <a href="https://www.genecards.org/cgi-bin/carddisp.pl?gene=TP53">https://www.genecards.org/cgi-bin/carddisp.pl?gene=TP53</a>     |
| CES1   | Carboxylesterase 1                                     | Protein Coding | 55 | GC16M055836 | 17.61368179 | <a href="https://www.genecards.org/cgi-bin/carddisp.pl?gene=CES1">https://www.genecards.org/cgi-bin/carddisp.pl?gene=CES1</a>     |
| HNF4A  | Hepatocyte Nuclear Factor 4 Alpha                      | Protein Coding | 56 | GC20P044355 | 17.52772713 | <a href="https://www.genecards.org/cgi-bin/carddisp.pl?gene=HNF4A">https://www.genecards.org/cgi-bin/carddisp.pl?gene=HNF4A</a>   |
| ABCD4  | ATP Binding Cassette Subfamily D Member 4              | Protein Coding | 50 | GC14M074285 | 17.33675766 | <a href="https://www.genecards.org/cgi-bin/carddisp.pl?gene=ABCD4">https://www.genecards.org/cgi-bin/carddisp.pl?gene=ABCD4</a>   |
| UGT1A6 | UDP Glucuronosyltransferase Family 1 Member A6         | Protein Coding | 48 | GC02P233691 | 17.17436981 | <a href="https://www.genecards.org/cgi-bin/carddisp.pl?gene=UGT1A6">https://www.genecards.org/cgi-bin/carddisp.pl?gene=UGT1A6</a> |
| ASS1   | Argininosuccinate Synthase 1                           | Protein Coding | 56 | GC09P130444 | 17.09732819 | <a href="https://www.genecards.org/cgi-bin/carddisp.pl?gene=ASS1">https://www.genecards.org/cgi-bin/carddisp.pl?gene=ASS1</a>     |
| MCEE   | Methylmalonyl-CoA Epimerase                            | Protein Coding | 47 | GC02M071110 | 17.0945816  | <a href="https://www.genecards.org/cgi-bin/carddisp.pl?gene=MCEE">https://www.genecards.org/cgi-bin/carddisp.pl?gene=MCEE</a>     |
| HLCS   | Holocarboxylase Synthetase                             | Protein Coding | 48 | GC21M036750 | 17.08519173 | <a href="https://www.genecards.org/cgi-bin/carddisp.pl?gene=HLCS">https://www.genecards.org/cgi-bin/carddisp.pl?gene=HLCS</a>     |
| POMC   | Proopiomelanocortin                                    | Protein Coding | 55 | GC02M025160 | 16.98484993 | <a href="https://www.genecards.org/cgi-bin/carddisp.pl?gene=POMC">https://www.genecards.org/cgi-bin/carddisp.pl?gene=POMC</a>     |
| ACE    | Angiotensin I Converting Enzyme                        | Protein Coding | 59 | GC17P063477 | 16.94721031 | <a href="https://www.genecards.org/cgi-bin/carddisp.pl?gene=ACE">https://www.genecards.org/cgi-bin/carddisp.pl?gene=ACE</a>       |

|         |                                               |                |    |             |             |                                                                                                                                     |
|---------|-----------------------------------------------|----------------|----|-------------|-------------|-------------------------------------------------------------------------------------------------------------------------------------|
| IVD     | Isovaleryl-CoA Dehydrogenase                  | Protein Coding | 51 | GC15P040405 | 16.93725967 | <a href="https://www.genecards.org/cgi-bin/carddisp.pl?gene=IVD">https://www.genecards.org/cgi-bin/carddisp.pl?gene=IVD</a>         |
| HIBCH   | 3-Hydroxyisobutyryl-CoA Hydrolase             | Protein Coding | 50 | GC02M190189 | 16.7645874  | <a href="https://www.genecards.org/cgi-bin/carddisp.pl?gene=HIBCH">https://www.genecards.org/cgi-bin/carddisp.pl?gene=HIBCH</a>     |
| NAGS    | N-Acetylglutamate Synthase                    | Protein Coding | 47 | GC17P044004 | 16.73843575 | <a href="https://www.genecards.org/cgi-bin/carddisp.pl?gene=NAGS">https://www.genecards.org/cgi-bin/carddisp.pl?gene=NAGS</a>       |
| LMBRD1  | LMBR1 Domain Containing 1                     | Protein Coding | 47 | GC06M072251 | 16.69300079 | <a href="https://www.genecards.org/cgi-bin/carddisp.pl?gene=LMBRD1">https://www.genecards.org/cgi-bin/carddisp.pl?gene=LMBRD1</a>   |
| SLC2A1  | Solute Carrier Family 2 Member 1              | Protein Coding | 60 | GC01M042925 | 16.59392548 | <a href="https://www.genecards.org/cgi-bin/carddisp.pl?gene=SLC2A1">https://www.genecards.org/cgi-bin/carddisp.pl?gene=SLC2A1</a>   |
| CETP    | Cholesteryl Ester Transfer Protein            | Protein Coding | 53 | GC16P056961 | 16.59146118 | <a href="https://www.genecards.org/cgi-bin/carddisp.pl?gene=CETP">https://www.genecards.org/cgi-bin/carddisp.pl?gene=CETP</a>       |
| CPS1    | Carbamoyl-Phosphate Synthase 1                | Protein Coding | 55 | GC02P210477 | 16.44989777 | <a href="https://www.genecards.org/cgi-bin/carddisp.pl?gene=CPS1">https://www.genecards.org/cgi-bin/carddisp.pl?gene=CPS1</a>       |
| CYP1B1  | Cytochrome P450 Family 1 Subfamily B Member 1 | Protein Coding | 54 | GC02M038066 | 16.42423248 | <a href="https://www.genecards.org/cgi-bin/carddisp.pl?gene=CYP1B1">https://www.genecards.org/cgi-bin/carddisp.pl?gene=CYP1B1</a>   |
| SLC22A5 | Solute Carrier Family 22 Member 5             | Protein Coding | 53 | GC05P132369 | 16.36189461 | <a href="https://www.genecards.org/cgi-bin/carddisp.pl?gene=SLC22A5">https://www.genecards.org/cgi-bin/carddisp.pl?gene=SLC22A5</a> |
| GPT     | Glutamic--Pyruvic Transaminase                | Protein Coding | 48 | GC08P144502 | 16.35798264 | <a href="https://www.genecards.org/cgi-bin/carddisp.pl?gene=GPT">https://www.genecards.org/cgi-bin/carddisp.pl?gene=GPT</a>         |
| GLDC    | Glycine Decarboxylase                         | Protein Coding | 53 | GC09M006522 | 16.15870285 | <a href="https://www.genecards.org/cgi-bin/carddisp.pl?gene=GLDC">https://www.genecards.org/cgi-bin/carddisp.pl?gene=GLDC</a>       |
| IL1B    | Interleukin 1 Beta                            | Protein Coding | 54 | GC02M112829 | 16.14551735 | <a href="https://www.genecards.org/cgi-bin/carddisp.pl?gene=IL1B">https://www.genecards.org/cgi-bin/carddisp.pl?gene=IL1B</a>       |
| VDR     | Vitamin D Receptor                            | Protein Coding | 56 | GC12M047841 | 16.03931808 | <a href="https://www.genecards.org/cgi-bin/carddisp.pl?gene=VDR">https://www.genecards.org/cgi-bin/carddisp.pl?gene=VDR</a>         |
| FH      | Fumarate Hydratase                            | Protein Coding | 53 | GC01M241499 | 15.98605347 | <a href="https://www.genecards.org/cgi-bin/carddisp.pl?gene=FH">https://www.genecards.org/cgi-bin/carddisp.pl?gene=FH</a>           |
| PRODH   | Proline Dehydrogenase 1                       | Protein Coding | 52 | GC22M018912 | 15.97478485 | <a href="https://www.genecards.org/cgi-bin/carddisp.pl?gene=PRODH">https://www.genecards.org/cgi-bin/carddisp.pl?gene=PRODH</a>     |

|         |                                                    |                |    |             |             |                                                                                                                                     |
|---------|----------------------------------------------------|----------------|----|-------------|-------------|-------------------------------------------------------------------------------------------------------------------------------------|
| CYP7A1  | Cytochrome P450 Family 7 Subfamily A Member 1      | Protein Coding | 49 | GC08M058476 | 15.92755032 | <a href="https://www.genecards.org/cgi-bin/carddisp.pl?gene=CYP7A1">https://www.genecards.org/cgi-bin/carddisp.pl?gene=CYP7A1</a>   |
| HSD11B1 | Hydroxysteroid 11-Beta Dehydrogenase 1             | Protein Coding | 58 | GC01P209686 | 15.90985107 | <a href="https://www.genecards.org/cgi-bin/carddisp.pl?gene=HSD11B1">https://www.genecards.org/cgi-bin/carddisp.pl?gene=HSD11B1</a> |
| ENPP1   | Ectonucleotide Pyrophosphatase/Phosphodiesterase 1 | Protein Coding | 56 | GC06P131808 | 15.89481449 | <a href="https://www.genecards.org/cgi-bin/carddisp.pl?gene=ENPP1">https://www.genecards.org/cgi-bin/carddisp.pl?gene=ENPP1</a>     |
| HSD11B2 | Hydroxysteroid 11-Beta Dehydrogenase 2             | Protein Coding | 52 | GC16P067433 | 15.8716507  | <a href="https://www.genecards.org/cgi-bin/carddisp.pl?gene=HSD11B2">https://www.genecards.org/cgi-bin/carddisp.pl?gene=HSD11B2</a> |
| CYP27B1 | Cytochrome P450 Family 27 Subfamily B Member 1     | Protein Coding | 52 | GC12M057790 | 15.85970306 | <a href="https://www.genecards.org/cgi-bin/carddisp.pl?gene=CYP27B1">https://www.genecards.org/cgi-bin/carddisp.pl?gene=CYP27B1</a> |
| XDH     | Xanthine Dehydrogenase                             | Protein Coding | 54 | GC02M031334 | 15.85227299 | <a href="https://www.genecards.org/cgi-bin/carddisp.pl?gene=XDH">https://www.genecards.org/cgi-bin/carddisp.pl?gene=XDH</a>         |
| RETN    | Resistin                                           | Protein Coding | 49 | GC19P007669 | 15.76069736 | <a href="https://www.genecards.org/cgi-bin/carddisp.pl?gene=RETN">https://www.genecards.org/cgi-bin/carddisp.pl?gene=RETN</a>       |
| ABCB1   | ATP Binding Cassette Subfamily B Member 1          | Protein Coding | 57 | GC07M087504 | 15.75623131 | <a href="https://www.genecards.org/cgi-bin/carddisp.pl?gene=ABCB1">https://www.genecards.org/cgi-bin/carddisp.pl?gene=ABCB1</a>     |
| CA5A    | Carbonic Anhydrase 5A                              | Protein Coding | 50 | GC16M087882 | 15.74926186 | <a href="https://www.genecards.org/cgi-bin/carddisp.pl?gene=CA5A">https://www.genecards.org/cgi-bin/carddisp.pl?gene=CA5A</a>       |
| MAT1A   | Methionine Adenosyltransferase 1A                  | Protein Coding | 52 | GC10M080271 | 15.67016792 | <a href="https://www.genecards.org/cgi-bin/carddisp.pl?gene=MAT1A">https://www.genecards.org/cgi-bin/carddisp.pl?gene=MAT1A</a>     |
| LEPR    | Leptin Receptor                                    | Protein Coding | 57 | GC01P065421 | 15.63416672 | <a href="https://www.genecards.org/cgi-bin/carddisp.pl?gene=LEPR">https://www.genecards.org/cgi-bin/carddisp.pl?gene=LEPR</a>       |
| IRS1    | Insulin Receptor Substrate 1                       | Protein Coding | 53 | GC02M226731 | 15.51399326 | <a href="https://www.genecards.org/cgi-bin/carddisp.pl?gene=IRS1">https://www.genecards.org/cgi-bin/carddisp.pl?gene=IRS1</a>       |
| UGT1A8  | UDP Glucuronosyltransferase Family 1 Member A8     | Protein Coding | 43 | GC02P233618 | 15.4636898  | <a href="https://www.genecards.org/cgi-bin/carddisp.pl?gene=UGT1A8">https://www.genecards.org/cgi-bin/carddisp.pl?gene=UGT1A8</a>   |
| GAMT    | Guanidinoacetate N-Methyltransferase               | Protein Coding | 52 | GC19M001397 | 15.44042587 | <a href="https://www.genecards.org/cgi-bin/carddisp.pl?gene=GAMT">https://www.genecards.org/cgi-bin/carddisp.pl?gene=GAMT</a>       |
| ABCA1   | ATP Binding Cassette Subfamily A Member 1          | Protein Coding | 55 | GC09M104781 | 15.39727402 | <a href="https://www.genecards.org/cgi-bin/carddisp.pl?gene=ABCA1">https://www.genecards.org/cgi-bin/carddisp.pl?gene=ABCA1</a>     |

|         |                                                            |                |    |             |             |                                                                                                                                     |
|---------|------------------------------------------------------------|----------------|----|-------------|-------------|-------------------------------------------------------------------------------------------------------------------------------------|
| UGT1A9  | UDP Glucuronosyltransferase Family 1 Member A9             | Protein Coding | 51 | GC02P233671 | 15.35033798 | <a href="https://www.genecards.org/cgi-bin/carddisp.pl?gene=UGT1A9">https://www.genecards.org/cgi-bin/carddisp.pl?gene=UGT1A9</a>   |
| GALT    | Galactose-1-Phosphate Uridyltransferase                    | Protein Coding | 53 | GC09P048949 | 15.34730434 | <a href="https://www.genecards.org/cgi-bin/carddisp.pl?gene=GALT">https://www.genecards.org/cgi-bin/carddisp.pl?gene=GALT</a>       |
| FGF23   | Fibroblast Growth Factor 23                                | Protein Coding | 52 | GC12M004368 | 15.22850227 | <a href="https://www.genecards.org/cgi-bin/carddisp.pl?gene=FGF23">https://www.genecards.org/cgi-bin/carddisp.pl?gene=FGF23</a>     |
| CYP17A1 | Cytochrome P450 Family 17 Subfamily A Member 1             | Protein Coding | 55 | GC10M102830 | 15.21972752 | <a href="https://www.genecards.org/cgi-bin/carddisp.pl?gene=CYP17A1">https://www.genecards.org/cgi-bin/carddisp.pl?gene=CYP17A1</a> |
| G6PC1   | Glucose-6-Phosphatase Catalytic Subunit 1                  | Protein Coding | 51 | GC17P063334 | 15.16344547 | <a href="https://www.genecards.org/cgi-bin/carddisp.pl?gene=G6PC1">https://www.genecards.org/cgi-bin/carddisp.pl?gene=G6PC1</a>     |
| HFE     | Homeostatic Iron Regulator                                 | Protein Coding | 52 | GC06P026087 | 15.10912323 | <a href="https://www.genecards.org/cgi-bin/carddisp.pl?gene=HFE">https://www.genecards.org/cgi-bin/carddisp.pl?gene=HFE</a>         |
| APOC3   | Apolipoprotein C3                                          | Protein Coding | 52 | GC11P116829 | 15.01816845 | <a href="https://www.genecards.org/cgi-bin/carddisp.pl?gene=APOC3">https://www.genecards.org/cgi-bin/carddisp.pl?gene=APOC3</a>     |
| FASN    | Fatty Acid Synthase                                        | Protein Coding | 55 | GC17M082078 | 15.00522327 | <a href="https://www.genecards.org/cgi-bin/carddisp.pl?gene=FASN">https://www.genecards.org/cgi-bin/carddisp.pl?gene=FASN</a>       |
| DPYD    | Dihydropyrimidine Dehydrogenase                            | Protein Coding | 59 | GC01M097015 | 14.99942017 | <a href="https://www.genecards.org/cgi-bin/carddisp.pl?gene=DPYD">https://www.genecards.org/cgi-bin/carddisp.pl?gene=DPYD</a>       |
| BCKDHA  | Branched Chain Keto Acid Dehydrogenase E1 Subunit Alpha    | Protein Coding | 51 | GC19P072922 | 14.99351788 | <a href="https://www.genecards.org/cgi-bin/carddisp.pl?gene=BCKDHA">https://www.genecards.org/cgi-bin/carddisp.pl?gene=BCKDHA</a>   |
| ADRB2   | Adrenoceptor Beta 2                                        | Protein Coding | 56 | GC05P148825 | 14.96682453 | <a href="https://www.genecards.org/cgi-bin/carddisp.pl?gene=ADRB2">https://www.genecards.org/cgi-bin/carddisp.pl?gene=ADRB2</a>     |
| ALDH2   | Aldehyde Dehydrogenase 2 Family Member                     | Protein Coding | 57 | GC12P111766 | 14.95112228 | <a href="https://www.genecards.org/cgi-bin/carddisp.pl?gene=ALDH2">https://www.genecards.org/cgi-bin/carddisp.pl?gene=ALDH2</a>     |
| NR3C2   | Nuclear Receptor Subfamily 3 Group C Member 2              | Protein Coding | 52 | GC04M148078 | 14.85720921 | <a href="https://www.genecards.org/cgi-bin/carddisp.pl?gene=NR3C2">https://www.genecards.org/cgi-bin/carddisp.pl?gene=NR3C2</a>     |
| SLCO1B1 | Solute Carrier Organic Anion Transporter Family Member 1B1 | Protein Coding | 55 | GC12P023907 | 14.79038334 | <a href="https://www.genecards.org/cgi-bin/carddisp.pl?gene=SLCO1B1">https://www.genecards.org/cgi-bin/carddisp.pl?gene=SLCO1B1</a> |
| HCFC1   | Host Cell Factor C1                                        | Protein Coding | 53 | GC0XM153947 | 14.77022457 | <a href="https://www.genecards.org/cgi-bin/carddisp.pl?gene=HCFC1">https://www.genecards.org/cgi-bin/carddisp.pl?gene=HCFC1</a>     |



|          |                                                |                |    |             |             |                                                                                                                                       |
|----------|------------------------------------------------|----------------|----|-------------|-------------|---------------------------------------------------------------------------------------------------------------------------------------|
| IL10     | Interleukin 10                                 | Protein Coding | 55 | GC01M206767 | 14.64819908 | <a href="https://www.genecards.org/cgi-bin/carddisp.pl?gene=IL10">https://www.genecards.org/cgi-bin/carddisp.pl?gene=IL10</a>         |
| CASR     | Calcium Sensing Receptor                       | Protein Coding | 57 | GC03P122183 | 14.60171509 | <a href="https://www.genecards.org/cgi-bin/carddisp.pl?gene=CASR">https://www.genecards.org/cgi-bin/carddisp.pl?gene=CASR</a>         |
| GCG      | Glucagon                                       | Protein Coding | 48 | GC02M162142 | 14.56726742 | <a href="https://www.genecards.org/cgi-bin/carddisp.pl?gene=GCG">https://www.genecards.org/cgi-bin/carddisp.pl?gene=GCG</a>           |
| PCSK9    | Proprotein Convertase Subtilisin/Kexin Type 9  | Protein Coding | 57 | GC01P055039 | 14.51441669 | <a href="https://www.genecards.org/cgi-bin/carddisp.pl?gene=PCSK9">https://www.genecards.org/cgi-bin/carddisp.pl?gene=PCSK9</a>       |
| HSD17B10 | Hydroxysteroid 17-Beta Dehydrogenase 10        | Protein Coding | 53 | GC0XM053431 | 14.5091486  | <a href="https://www.genecards.org/cgi-bin/carddisp.pl?gene=HSD17B10">https://www.genecards.org/cgi-bin/carddisp.pl?gene=HSD17B10</a> |
| SHBG     | Sex Hormone Binding Globulin                   | Protein Coding | 48 | GC17P007613 | 14.43100166 | <a href="https://www.genecards.org/cgi-bin/carddisp.pl?gene=SHBG">https://www.genecards.org/cgi-bin/carddisp.pl?gene=SHBG</a>         |
| SLC2A4   | Solute Carrier Family 2 Member 4               | Protein Coding | 52 | GC17P011713 | 14.34994125 | <a href="https://www.genecards.org/cgi-bin/carddisp.pl?gene=SLC2A4">https://www.genecards.org/cgi-bin/carddisp.pl?gene=SLC2A4</a>     |
| CYP19A1  | Cytochrome P450 Family 19 Subfamily A Member 1 | Protein Coding | 55 | GC15M051208 | 14.28239822 | <a href="https://www.genecards.org/cgi-bin/carddisp.pl?gene=CYP19A1">https://www.genecards.org/cgi-bin/carddisp.pl?gene=CYP19A1</a>   |
| HPD      | 4-Hydroxyphenylpyruvate Dioxygenase            | Protein Coding | 52 | GC12M121839 | 14.13055611 | <a href="https://www.genecards.org/cgi-bin/carddisp.pl?gene=HPD">https://www.genecards.org/cgi-bin/carddisp.pl?gene=HPD</a>           |
| HIF1A    | Hypoxia Inducible Factor 1 Subunit Alpha       | Protein Coding | 54 | GC14P061695 | 14.09283161 | <a href="https://www.genecards.org/cgi-bin/carddisp.pl?gene=HIF1A">https://www.genecards.org/cgi-bin/carddisp.pl?gene=HIF1A</a>       |
| VKORC1   | Vitamin K Epoxide Reductase Complex Subunit 1  | Protein Coding | 54 | GC16M038547 | 14.08553123 | <a href="https://www.genecards.org/cgi-bin/carddisp.pl?gene=VKORC1">https://www.genecards.org/cgi-bin/carddisp.pl?gene=VKORC1</a>     |
| AHCY     | Adenosylhomocysteinase                         | Protein Coding | 56 | GC20M034942 | 14.07678223 | <a href="https://www.genecards.org/cgi-bin/carddisp.pl?gene=AHCY">https://www.genecards.org/cgi-bin/carddisp.pl?gene=AHCY</a>         |
| FBP1     | Fructose-Bisphosphatase 1                      | Protein Coding | 56 | GC09M094603 | 14.06463623 | <a href="https://www.genecards.org/cgi-bin/carddisp.pl?gene=FBP1">https://www.genecards.org/cgi-bin/carddisp.pl?gene=FBP1</a>         |
| NOS3     | Nitric Oxide Synthase 3                        | Protein Coding | 56 | GC07P150990 | 14.06137276 | <a href="https://www.genecards.org/cgi-bin/carddisp.pl?gene=NOS3">https://www.genecards.org/cgi-bin/carddisp.pl?gene=NOS3</a>         |
| ALDH5A1  | Aldehyde Dehydrogenase 5 Family Member A1      | Protein Coding | 54 | GC06P024494 | 14.05005932 | <a href="https://www.genecards.org/cgi-bin/carddisp.pl?gene=ALDH5A1">https://www.genecards.org/cgi-bin/carddisp.pl?gene=ALDH5A1</a>   |

|       |                                                  |                |    |             |             |                                                                                                                                     |
|-------|--------------------------------------------------|----------------|----|-------------|-------------|-------------------------------------------------------------------------------------------------------------------------------------|
| FTCD  | Formimidoyltransferase Cyclodeaminase            | Protein Coding | 49 | GC21M051374 | 14.04514503 | <a href="https://www.genecards.org/cgi-bin/carddisp.pl?gene=ALDH5A1">https://www.genecards.org/cgi-bin/carddisp.pl?gene=ALDH5A1</a> |
| LDHA  | Lactate Dehydrogenase A                          | Protein Coding | 57 | GC11P018394 | 14.0241642  | <a href="https://www.genecards.org/cgi-bin/carddisp.pl?gene=FTCD">https://www.genecards.org/cgi-bin/carddisp.pl?gene=FTCD</a>       |
| PTH   | Parathyroid Hormone                              | Protein Coding | 52 | GC11M013492 | 14.01707935 | <a href="https://www.genecards.org/cgi-bin/carddisp.pl?gene=LDHA">https://www.genecards.org/cgi-bin/carddisp.pl?gene=LDHA</a>       |
| PPARD | Peroxisome Proliferator Activated Receptor Delta | Protein Coding | 52 | GC06P092273 | 13.99849129 | <a href="https://www.genecards.org/cgi-bin/carddisp.pl?gene=PTH">https://www.genecards.org/cgi-bin/carddisp.pl?gene=PTH</a>         |
| UCP2  | Uncoupling Protein 2                             | Protein Coding | 52 | GC11M073974 | 13.88011551 | <a href="https://www.genecards.org/cgi-bin/carddisp.pl?gene=PPARD">https://www.genecards.org/cgi-bin/carddisp.pl?gene=PPARD</a>     |
| GSTP1 | Glutathione S-Transferase Pi 1                   | Protein Coding | 57 | GC11P067583 | 13.80813503 | <a href="https://www.genecards.org/cgi-bin/carddisp.pl?gene=UCP2">https://www.genecards.org/cgi-bin/carddisp.pl?gene=UCP2</a>       |
| ESR1  | Estrogen Receptor 1                              | Protein Coding | 61 | GC06P151656 | 13.80347061 | <a href="https://www.genecards.org/cgi-bin/carddisp.pl?gene=GSTP1">https://www.genecards.org/cgi-bin/carddisp.pl?gene=GSTP1</a>     |
| PTGS2 | Prostaglandin-Endoperoxide Synthase 2            | Protein Coding | 56 | GC01M186671 | 13.66300106 | <a href="https://www.genecards.org/cgi-bin/carddisp.pl?gene=ESR1">https://www.genecards.org/cgi-bin/carddisp.pl?gene=ESR1</a>       |
| PON1  | Paraoxonase 1                                    | Protein Coding | 55 | GC07M095297 | 13.57410049 | <a href="https://www.genecards.org/cgi-bin/carddisp.pl?gene=PTGS2">https://www.genecards.org/cgi-bin/carddisp.pl?gene=PTGS2</a>     |
| ETFA  | Electron Transfer Flavoprotein Subunit Alpha     | Protein Coding | 52 | GC15M122358 | 13.51145744 | <a href="https://www.genecards.org/cgi-bin/carddisp.pl?gene=PON1">https://www.genecards.org/cgi-bin/carddisp.pl?gene=PON1</a>       |
| HMGCR | 3-Hydroxy-3-Methylglutaryl-CoA Reductase         | Protein Coding | 53 | GC05P075336 | 13.458951   | <a href="https://www.genecards.org/cgi-bin/carddisp.pl?gene=ETFA">https://www.genecards.org/cgi-bin/carddisp.pl?gene=ETFA</a>       |
| FAH   | Fumarylacetoacetate Hydrolase                    | Protein Coding | 53 | GC15P080152 | 13.40405846 | <a href="https://www.genecards.org/cgi-bin/carddisp.pl?gene=HMGCR">https://www.genecards.org/cgi-bin/carddisp.pl?gene=HMGCR</a>     |
| PSAP  | Prosaposin                                       | Protein Coding | 54 | GC10M071816 | 13.35322666 | <a href="https://www.genecards.org/cgi-bin/carddisp.pl?gene=FAH">https://www.genecards.org/cgi-bin/carddisp.pl?gene=FAH</a>         |
| CP    | Ceruloplasmin                                    | Protein Coding | 55 | GC03M149162 | 13.33574104 | <a href="https://www.genecards.org/cgi-bin/carddisp.pl?gene=PSAP">https://www.genecards.org/cgi-bin/carddisp.pl?gene=PSAP</a>       |
| COMT  | Catechol-O-Methyltransferase                     | Protein Coding | 59 | GC22P019941 | 13.30807877 | <a href="https://www.genecards.org/cgi-bin/carddisp.pl?gene=CP">https://www.genecards.org/cgi-bin/carddisp.pl?gene=CP</a>           |
|       |                                                  |                |    |             |             | <a href="https://www.genecards.org/cgi-bin/carddisp.pl?gene=COMT">https://www.genecards.org/cgi-bin/carddisp.pl?gene=COMT</a>       |

|         |                                                          |                |    |             |             |                                                                                                                                     |
|---------|----------------------------------------------------------|----------------|----|-------------|-------------|-------------------------------------------------------------------------------------------------------------------------------------|
| SREBF1  | Sterol Regulatory Element Binding Transcription Factor 1 | Protein Coding | 53 | GC17M017810 | 13.25699425 | <a href="https://www.genecards.org/cgi-bin/carddisp.pl?gene=SREBF1">https://www.genecards.org/cgi-bin/carddisp.pl?gene=SREBF1</a>   |
| NR1H2   | Nuclear Receptor Subfamily 1 Group H Member 2            | Protein Coding | 53 | GC19P050329 | 13.08687782 | <a href="https://www.genecards.org/cgi-bin/carddisp.pl?gene=NR1H2">https://www.genecards.org/cgi-bin/carddisp.pl?gene=NR1H2</a>     |
| ASL     | Argininosuccinate Lyase                                  | Protein Coding | 52 | GC07P066075 | 12.97810268 | <a href="https://www.genecards.org/cgi-bin/carddisp.pl?gene=ASL">https://www.genecards.org/cgi-bin/carddisp.pl?gene=ASL</a>         |
| HADH    | Hydroxyacyl-CoA Dehydrogenase                            | Protein Coding | 54 | GC04P107989 | 12.95173168 | <a href="https://www.genecards.org/cgi-bin/carddisp.pl?gene=HADH">https://www.genecards.org/cgi-bin/carddisp.pl?gene=HADH</a>       |
| SMPD1   | Sphingomyelin Phosphodiesterase 1                        | Protein Coding | 56 | GC11P006390 | 12.94299412 | <a href="https://www.genecards.org/cgi-bin/carddisp.pl?gene=SMPD1">https://www.genecards.org/cgi-bin/carddisp.pl?gene=SMPD1</a>     |
| COX5A   | Cytochrome C Oxidase Subunit 5A                          | Protein Coding | 50 | GC15M074919 | 12.93949127 | <a href="https://www.genecards.org/cgi-bin/carddisp.pl?gene=COX5A">https://www.genecards.org/cgi-bin/carddisp.pl?gene=COX5A</a>     |
| REN     | Renin                                                    | Protein Coding | 55 | GC01M204154 | 12.88049412 | <a href="https://www.genecards.org/cgi-bin/carddisp.pl?gene=REN">https://www.genecards.org/cgi-bin/carddisp.pl?gene=REN</a>         |
| GSS     | Glutathione Synthetase                                   | Protein Coding | 53 | GC20M034928 | 12.87272263 | <a href="https://www.genecards.org/cgi-bin/carddisp.pl?gene=GSS">https://www.genecards.org/cgi-bin/carddisp.pl?gene=GSS</a>         |
| G6PD    | Glucose-6-Phosphate Dehydrogenase                        | Protein Coding | 57 | GC0XM154562 | 12.85865021 | <a href="https://www.genecards.org/cgi-bin/carddisp.pl?gene=G6PD">https://www.genecards.org/cgi-bin/carddisp.pl?gene=G6PD</a>       |
| SLC16A1 | Solute Carrier Family 16 Member 1                        | Protein Coding | 54 | GC01M113013 | 12.82639217 | <a href="https://www.genecards.org/cgi-bin/carddisp.pl?gene=SLC16A1">https://www.genecards.org/cgi-bin/carddisp.pl?gene=SLC16A1</a> |
| CD36    | CD36 Molecule                                            | Protein Coding | 56 | GC07P080369 | 12.77978039 | <a href="https://www.genecards.org/cgi-bin/carddisp.pl?gene=CD36">https://www.genecards.org/cgi-bin/carddisp.pl?gene=CD36</a>       |
| NPC1    | NPC Intracellular Cholesterol Transporter 1              | Protein Coding | 56 | GC18M023506 | 12.75236893 | <a href="https://www.genecards.org/cgi-bin/carddisp.pl?gene=NPC1">https://www.genecards.org/cgi-bin/carddisp.pl?gene=NPC1</a>       |
| DDC     | Dopa Decarboxylase                                       | Protein Coding | 57 | GC07M050458 | 12.74859524 | <a href="https://www.genecards.org/cgi-bin/carddisp.pl?gene=DDC">https://www.genecards.org/cgi-bin/carddisp.pl?gene=DDC</a>         |
| APOA5   | Apolipoprotein A5                                        | Protein Coding | 51 | GC11M116789 | 12.7049284  | <a href="https://www.genecards.org/cgi-bin/carddisp.pl?gene=APOA5">https://www.genecards.org/cgi-bin/carddisp.pl?gene=APOA5</a>     |
| CYP21A2 | Cytochrome P450 Family 21 Subfamily A Member 2           | Protein Coding | 51 | GC06P092176 | 12.66181755 | <a href="https://www.genecards.org/cgi-bin/carddisp.pl?gene=CYP21A2">https://www.genecards.org/cgi-bin/carddisp.pl?gene=CYP21A2</a> |

|         |                                                        |                |    |             |             |                                                                                                                                     |
|---------|--------------------------------------------------------|----------------|----|-------------|-------------|-------------------------------------------------------------------------------------------------------------------------------------|
| CXCL8   | C-X-C Motif Chemokine Ligand 8                         | Protein Coding | 50 | GC04P073740 | 12.65779114 | <a href="https://www.genecards.org/cgi-bin/carddisp.pl?gene=CYP21A2">https://www.genecards.org/cgi-bin/carddisp.pl?gene=CYP21A2</a> |
| UGT1A3  | UDP Glucuronosyltransferase Family 1 Member A3         | Protein Coding | 44 | GC02P233729 | 12.65203857 | <a href="https://www.genecards.org/cgi-bin/carddisp.pl?gene=CXCL8">https://www.genecards.org/cgi-bin/carddisp.pl?gene=CXCL8</a>     |
| EPHX1   | Epoxide Hydrolase 1                                    | Protein Coding | 52 | GC01P225810 | 12.62948704 | <a href="https://www.genecards.org/cgi-bin/carddisp.pl?gene=UGT1A3">https://www.genecards.org/cgi-bin/carddisp.pl?gene=UGT1A3</a>   |
| MLYCD   | Malonyl-CoA Decarboxylase                              | Protein Coding | 48 | GC16P083899 | 12.62700081 | <a href="https://www.genecards.org/cgi-bin/carddisp.pl?gene=EPHX1">https://www.genecards.org/cgi-bin/carddisp.pl?gene=EPHX1</a>     |
| CYP24A1 | Cytochrome P450 Family 24 Subfamily A Member 1         | Protein Coding | 53 | GC20M054153 | 12.61680889 | <a href="https://www.genecards.org/cgi-bin/carddisp.pl?gene=MLYCD">https://www.genecards.org/cgi-bin/carddisp.pl?gene=MLYCD</a>     |
| PDHA1   | Pyruvate Dehydrogenase E1 Subunit Alpha 1              | Protein Coding | 54 | GC0XP019343 | 12.60220623 | <a href="https://www.genecards.org/cgi-bin/carddisp.pl?gene=CYP24A1">https://www.genecards.org/cgi-bin/carddisp.pl?gene=CYP24A1</a> |
| PRKAA2  | Protein Kinase AMP-Activated Catalytic Subunit Alpha 2 | Protein Coding | 57 | GC01P056645 | 12.5937233  | <a href="https://www.genecards.org/cgi-bin/carddisp.pl?gene=PDHA1">https://www.genecards.org/cgi-bin/carddisp.pl?gene=PDHA1</a>     |
| SOD1    | Superoxide Dismutase 1                                 | Protein Coding | 60 | GC21P031659 | 12.58113956 | <a href="https://www.genecards.org/cgi-bin/carddisp.pl?gene=PRKAA2">https://www.genecards.org/cgi-bin/carddisp.pl?gene=PRKAA2</a>   |
| UGT1A10 | UDP Glucuronosyltransferase Family 1 Member A10        | Protein Coding | 48 | GC02P233636 | 12.54686928 | <a href="https://www.genecards.org/cgi-bin/carddisp.pl?gene=SOD1">https://www.genecards.org/cgi-bin/carddisp.pl?gene=SOD1</a>       |
| SLC17A5 | Solute Carrier Family 17 Member 5                      | Protein Coding | 51 | GC06M073593 | 12.54128933 | <a href="https://www.genecards.org/cgi-bin/carddisp.pl?gene=UGT1A10">https://www.genecards.org/cgi-bin/carddisp.pl?gene=UGT1A10</a> |
| NAT2    | N-Acetyltransferase 2                                  | Protein Coding | 47 | GC08P018391 | 12.47551346 | <a href="https://www.genecards.org/cgi-bin/carddisp.pl?gene=SLC17A5">https://www.genecards.org/cgi-bin/carddisp.pl?gene=SLC17A5</a> |
| LIPE    | Lipase E, Hormone Sensitive Type                       | Protein Coding | 54 | GC19M042401 | 12.46535015 | <a href="https://www.genecards.org/cgi-bin/carddisp.pl?gene=NAT2">https://www.genecards.org/cgi-bin/carddisp.pl?gene=NAT2</a>       |
| PLA2G4A | Phospholipase A2 Group IVA                             | Protein Coding | 55 | GC01P186798 | 12.43510914 | <a href="https://www.genecards.org/cgi-bin/carddisp.pl?gene=LIPE">https://www.genecards.org/cgi-bin/carddisp.pl?gene=LIPE</a>       |
| ACACA   | Acetyl-CoA Carboxylase Alpha                           | Protein Coding | 55 | GC17M037084 | 12.39061165 | <a href="https://www.genecards.org/cgi-bin/carddisp.pl?gene=PLA2G4A">https://www.genecards.org/cgi-bin/carddisp.pl?gene=PLA2G4A</a> |
| PRKAA1  | Protein Kinase AMP-Activated Catalytic Subunit Alpha 1 | Protein Coding | 54 | GC05M040759 | 12.38722038 | <a href="https://www.genecards.org/cgi-bin/carddisp.pl?gene=ACACA">https://www.genecards.org/cgi-bin/carddisp.pl?gene=ACACA</a>     |

|          |                                                |                |    |             |             |                                                                                                                                     |
|----------|------------------------------------------------|----------------|----|-------------|-------------|-------------------------------------------------------------------------------------------------------------------------------------|
| ADA      | Adenosine Deaminase                            | Protein Coding | 57 | GC20M044620 | 12.38394356 | <a href="https://www.genecards.org/cgi-bin/carddisp.pl?gene=PRKAA1">https://www.genecards.org/cgi-bin/carddisp.pl?gene=PRKAA1</a>   |
| NR1I2    | Nuclear Receptor Subfamily 1 Group I Member 2  | Protein Coding | 51 | GC03P119780 | 12.3428793  | <a href="https://www.genecards.org/cgi-bin/carddisp.pl?gene=ADA">https://www.genecards.org/cgi-bin/carddisp.pl?gene=ADA</a>         |
| QDPR     | Quinoid Dihydropteridine Reductase             | Protein Coding | 53 | GC04M017460 | 12.31072426 | <a href="https://www.genecards.org/cgi-bin/carddisp.pl?gene=NR1I2">https://www.genecards.org/cgi-bin/carddisp.pl?gene=NR1I2</a>     |
| ALDH6A1  | Aldehyde Dehydrogenase 6 Family Member A1      | Protein Coding | 52 | GC14M074059 | 12.25684834 | <a href="https://www.genecards.org/cgi-bin/carddisp.pl?gene=QDPR">https://www.genecards.org/cgi-bin/carddisp.pl?gene=QDPR</a>       |
| ABCC2    | ATP Binding Cassette Subfamily C Member 2      | Protein Coding | 55 | GC10P099782 | 12.24063396 | <a href="https://www.genecards.org/cgi-bin/carddisp.pl?gene=ALDH6A1">https://www.genecards.org/cgi-bin/carddisp.pl?gene=ALDH6A1</a> |
| F2       | Coagulation Factor II, Thrombin                | Protein Coding | 56 | GC11P046720 | 12.21356201 | <a href="https://www.genecards.org/cgi-bin/carddisp.pl?gene=ABCC2">https://www.genecards.org/cgi-bin/carddisp.pl?gene=ABCC2</a>     |
| DLD      | Dihydrolipoamide Dehydrogenase                 | Protein Coding | 56 | GC07P107890 | 12.20763779 | <a href="https://www.genecards.org/cgi-bin/carddisp.pl?gene=F2">https://www.genecards.org/cgi-bin/carddisp.pl?gene=F2</a>           |
| PYGM     | Glycogen Phosphorylase, Muscle Associated      | Protein Coding | 53 | GC11M064746 | 12.18904305 | <a href="https://www.genecards.org/cgi-bin/carddisp.pl?gene=DLD">https://www.genecards.org/cgi-bin/carddisp.pl?gene=DLD</a>         |
| HBB      | Hemoglobin Subunit Beta                        | Protein Coding | 51 | GC11M006827 | 12.17414379 | <a href="https://www.genecards.org/cgi-bin/carddisp.pl?gene=PYGM">https://www.genecards.org/cgi-bin/carddisp.pl?gene=PYGM</a>       |
| CCL2     | C-C Motif Chemokine Ligand 2                   | Protein Coding | 56 | GC17P034255 | 12.15099144 | <a href="https://www.genecards.org/cgi-bin/carddisp.pl?gene=HBB">https://www.genecards.org/cgi-bin/carddisp.pl?gene=HBB</a>         |
| MCCC2    | Methylcrotonyl-CoA Carboxylase Subunit 2       | Protein Coding | 51 | GC05P073552 | 12.12744713 | <a href="https://www.genecards.org/cgi-bin/carddisp.pl?gene=CCL2">https://www.genecards.org/cgi-bin/carddisp.pl?gene=CCL2</a>       |
| ARSA     | Arylsulfatase A                                | Protein Coding | 53 | GC22M050622 | 12.1175108  | <a href="https://www.genecards.org/cgi-bin/carddisp.pl?gene=MCCC2">https://www.genecards.org/cgi-bin/carddisp.pl?gene=MCCC2</a>     |
| UGT1A7   | UDP Glucuronosyltransferase Family 1 Member A7 | Protein Coding | 47 | GC02P233681 | 12.10301018 | <a href="https://www.genecards.org/cgi-bin/carddisp.pl?gene=ARSA">https://www.genecards.org/cgi-bin/carddisp.pl?gene=ARSA</a>       |
| KL       | Klotho                                         | Protein Coding | 54 | GC13P033016 | 12.0826025  | <a href="https://www.genecards.org/cgi-bin/carddisp.pl?gene=UGT1A7">https://www.genecards.org/cgi-bin/carddisp.pl?gene=UGT1A7</a>   |
| SERPINE1 | Serpin Family E Member 1                       | Protein Coding | 57 | GC07P101127 | 12.04139709 | <a href="https://www.genecards.org/cgi-bin/carddisp.pl?gene=KL">https://www.genecards.org/cgi-bin/carddisp.pl?gene=KL</a>           |

|        |                                                               |                |    |             |             |                                                                                                                                                  |
|--------|---------------------------------------------------------------|----------------|----|-------------|-------------|--------------------------------------------------------------------------------------------------------------------------------------------------|
| DYRK1B | Dual Specificity Tyrosine Phosphorylation Regulated Kinase 1B | Protein Coding | 53 | GC19M039825 | 12.03226757 | ne=SERPINE1<br><a href="https://www.genecards.org/cgi-bin/carddisp.pl?gene=DYRK1B">https://www.genecards.org/cgi-bin/carddisp.pl?gene=DYRK1B</a> |
| SUOX   | Sulfite Oxidase                                               | Protein Coding | 51 | GC12P055997 | 12.02076054 | ne=SUOX<br><a href="https://www.genecards.org/cgi-bin/carddisp.pl?gene=SUOX">https://www.genecards.org/cgi-bin/carddisp.pl?gene=SUOX</a>         |
| NR1H4  | Nuclear Receptor Subfamily 1 Group H Member 4                 | Protein Coding | 55 | GC12P100473 | 12.00567818 | ne=NR1H4<br><a href="https://www.genecards.org/cgi-bin/carddisp.pl?gene=NR1H4">https://www.genecards.org/cgi-bin/carddisp.pl?gene=NR1H4</a>      |
| BCKDK  | Branched Chain Keto Acid Dehydrogenase Kinase                 | Protein Coding | 52 | GC16P042844 | 11.98306084 | ne=BCKDK<br><a href="https://www.genecards.org/cgi-bin/carddisp.pl?gene=BCKDK">https://www.genecards.org/cgi-bin/carddisp.pl?gene=BCKDK</a>      |
| PTEN   | Phosphatase And Tensin Homolog                                | Protein Coding | 59 | GC10P094594 | 11.97610664 | ne=PTEN<br><a href="https://www.genecards.org/cgi-bin/carddisp.pl?gene=PTEN">https://www.genecards.org/cgi-bin/carddisp.pl?gene=PTEN</a>         |
| CS     | Citrate Synthase                                              | Protein Coding | 51 | GC12M056271 | 11.92381477 | ne=CS<br><a href="https://www.genecards.org/cgi-bin/carddisp.pl?gene=CS">https://www.genecards.org/cgi-bin/carddisp.pl?gene=CS</a>               |
| ALDOB  | Aldolase, Fructose-Bisphosphate B                             | Protein Coding | 52 | GC09M101420 | 11.91490173 | ne=ALDOB<br><a href="https://www.genecards.org/cgi-bin/carddisp.pl?gene=ALDOB">https://www.genecards.org/cgi-bin/carddisp.pl?gene=ALDOB</a>      |
| APOA2  | Apolipoprotein A2                                             | Protein Coding | 52 | GC01M161222 | 11.90166092 | ne=APOA2<br><a href="https://www.genecards.org/cgi-bin/carddisp.pl?gene=APOA2">https://www.genecards.org/cgi-bin/carddisp.pl?gene=APOA2</a>      |
| IFNG   | Interferon Gamma                                              | Protein Coding | 57 | GC12M068154 | 11.8699913  | ne=IFNG<br><a href="https://www.genecards.org/cgi-bin/carddisp.pl?gene=IFNG">https://www.genecards.org/cgi-bin/carddisp.pl?gene=IFNG</a>         |
| DPP4   | Dipeptidyl Peptidase 4                                        | Protein Coding | 57 | GC02M161992 | 11.85106945 | ne=DPP4<br><a href="https://www.genecards.org/cgi-bin/carddisp.pl?gene=DPP4">https://www.genecards.org/cgi-bin/carddisp.pl?gene=DPP4</a>         |
| PNP    | Purine Nucleoside Phosphorylase                               | Protein Coding | 56 | GC14P034354 | 11.83236408 | ne=PNP<br><a href="https://www.genecards.org/cgi-bin/carddisp.pl?gene=PNP">https://www.genecards.org/cgi-bin/carddisp.pl?gene=PNP</a>            |
| ALPL   | Alkaline Phosphatase, Biomineralization Associated            | Protein Coding | 58 | GC01P021508 | 11.82943535 | ne=ALPL<br><a href="https://www.genecards.org/cgi-bin/carddisp.pl?gene=ALPL">https://www.genecards.org/cgi-bin/carddisp.pl?gene=ALPL</a>         |
| ALOX5  | Arachidonate 5-Lipoxygenase                                   | Protein Coding | 54 | GC10P045374 | 11.82166386 | ne=ALOX5<br><a href="https://www.genecards.org/cgi-bin/carddisp.pl?gene=ALOX5">https://www.genecards.org/cgi-bin/carddisp.pl?gene=ALOX5</a>      |
| GATM   | Glycine Amidinotransferase                                    | Protein Coding | 52 | GC15M045361 | 11.68083858 | ne=GATM<br><a href="https://www.genecards.org/cgi-bin/carddisp.pl?gene=GATM">https://www.genecards.org/cgi-bin/carddisp.pl?gene=GATM</a>         |
| MCCC1  | Methylcrotonyl-CoA Carboxylase Subunit 1                      | Protein Coding | 50 | GC03M183015 | 11.66801453 | ne=MCCC1<br><a href="https://www.genecards.org/cgi-bin/carddisp.pl?gene=MCCC1">https://www.genecards.org/cgi-bin/carddisp.pl?gene=MCCC1</a>      |

|         |                                                                              |                |    |             |             |                                                                                                                                           |
|---------|------------------------------------------------------------------------------|----------------|----|-------------|-------------|-------------------------------------------------------------------------------------------------------------------------------------------|
| BCHE    | Butyrylcholinesterase                                                        | Protein Coding | 57 | GC03M165772 | 11.63358974 | ne=MCCC1<br><a href="https://www.genecards.org/cgi-bin/carddisp.pl?gene=BCHE">https://www.genecards.org/cgi-bin/carddisp.pl?gene=BCHE</a> |
| PIK3CA  | Phosphatidylinositol-4,5-Bisphosphate 3-Kinase Catalytic Subunit Alpha       | Protein Coding | 59 | GC03P179148 | 11.63045788 | <a href="https://www.genecards.org/cgi-bin/carddisp.pl?gene=PIK3CA">https://www.genecards.org/cgi-bin/carddisp.pl?gene=PIK3CA</a>         |
| MPO     | Myeloperoxidase                                                              | Protein Coding | 59 | GC17M058269 | 11.59176159 | <a href="https://www.genecards.org/cgi-bin/carddisp.pl?gene=MPO">https://www.genecards.org/cgi-bin/carddisp.pl?gene=MPO</a>               |
| ARG1    | Arginase 1                                                                   | Protein Coding | 56 | GC06P131473 | 11.57893658 | <a href="https://www.genecards.org/cgi-bin/carddisp.pl?gene=ARG1">https://www.genecards.org/cgi-bin/carddisp.pl?gene=ARG1</a>             |
| SLC4A1  | Solute Carrier Family 4 Member 1 (Diego Blood Group)                         | Protein Coding | 54 | GC17M051897 | 11.54837894 | <a href="https://www.genecards.org/cgi-bin/carddisp.pl?gene=SLC4A1">https://www.genecards.org/cgi-bin/carddisp.pl?gene=SLC4A1</a>         |
| FABP4   | Fatty Acid Binding Protein 4                                                 | Protein Coding | 50 | GC08M081478 | 11.49729919 | <a href="https://www.genecards.org/cgi-bin/carddisp.pl?gene=FABP4">https://www.genecards.org/cgi-bin/carddisp.pl?gene=FABP4</a>           |
| CAT     | Catalase                                                                     | Protein Coding | 58 | GC11P034460 | 11.48341846 | <a href="https://www.genecards.org/cgi-bin/carddisp.pl?gene=CAT">https://www.genecards.org/cgi-bin/carddisp.pl?gene=CAT</a>               |
| STAR    | Steroidogenic Acute Regulatory Protein                                       | Protein Coding | 51 | GC08M038145 | 11.43203926 | <a href="https://www.genecards.org/cgi-bin/carddisp.pl?gene=STAR">https://www.genecards.org/cgi-bin/carddisp.pl?gene=STAR</a>             |
| ABCC8   | ATP Binding Cassette Subfamily C Member 8                                    | Protein Coding | 53 | GC11M017392 | 11.42554283 | <a href="https://www.genecards.org/cgi-bin/carddisp.pl?gene=ABCC8">https://www.genecards.org/cgi-bin/carddisp.pl?gene=ABCC8</a>           |
| OGDH    | Oxoglutarate Dehydrogenase                                                   | Protein Coding | 53 | GC07P044606 | 11.42041874 | <a href="https://www.genecards.org/cgi-bin/carddisp.pl?gene=OGDH">https://www.genecards.org/cgi-bin/carddisp.pl?gene=OGDH</a>             |
| NQO1    | NAD(P)H Quinone Dehydrogenase 1                                              | Protein Coding | 55 | GC16M069706 | 11.40145969 | <a href="https://www.genecards.org/cgi-bin/carddisp.pl?gene=NQO1">https://www.genecards.org/cgi-bin/carddisp.pl?gene=NQO1</a>             |
| HADHB   | Hydroxyacyl-CoA Dehydrogenase Trifunctional Multienzyme Complex Subunit Beta | Protein Coding | 54 | GC02P026243 | 11.36002731 | <a href="https://www.genecards.org/cgi-bin/carddisp.pl?gene=HADHB">https://www.genecards.org/cgi-bin/carddisp.pl?gene=HADHB</a>           |
| SULT1A1 | Sulfotransferase Family 1A Member 1                                          | Protein Coding | 50 | GC16M038249 | 11.33466053 | <a href="https://www.genecards.org/cgi-bin/carddisp.pl?gene=SULT1A1">https://www.genecards.org/cgi-bin/carddisp.pl?gene=SULT1A1</a>       |
| MVK     | Mevalonate Kinase                                                            | Protein Coding | 54 | GC12P109573 | 11.33141518 | <a href="https://www.genecards.org/cgi-bin/carddisp.pl?gene=MVK">https://www.genecards.org/cgi-bin/carddisp.pl?gene=MVK</a>               |
| AMPD3   | Adenosine Monophosphate Deaminase 3                                          | Protein Coding | 51 | GC11P010309 | 11.29901218 | <a href="https://www.genecards.org/cgi-bin/carddisp.pl?gene=AMPD3">https://www.genecards.org/cgi-bin/carddisp.pl?gene=AMPD3</a>           |

|        |                                                             |                |    |             |             |                                                                                                                                   |
|--------|-------------------------------------------------------------|----------------|----|-------------|-------------|-----------------------------------------------------------------------------------------------------------------------------------|
| FABP2  | Fatty Acid Binding Protein 2                                | Protein Coding | 48 | GC04M119317 | 11.29714584 | <a href="https://www.genecards.org/cgi-bin/carddisp.pl?gene=FABP2">https://www.genecards.org/cgi-bin/carddisp.pl?gene=FABP2</a>   |
| UGT1A  | UDP Glucuronosyltransferase Family 1 Member A Complex Locus | Uncategorized  | 13 | GC02P233592 | 11.28607178 | <a href="https://www.genecards.org/cgi-bin/carddisp.pl?gene=UGT1A">https://www.genecards.org/cgi-bin/carddisp.pl?gene=UGT1A</a>   |
| TF     | Transferrin                                                 | Protein Coding | 57 | GC03P135056 | 11.27254391 | <a href="https://www.genecards.org/cgi-bin/carddisp.pl?gene=TF">https://www.genecards.org/cgi-bin/carddisp.pl?gene=TF</a>         |
| RYR1   | Ryanodine Receptor 1                                        | Protein Coding | 53 | GC19P072806 | 11.22693443 | <a href="https://www.genecards.org/cgi-bin/carddisp.pl?gene=RYR1">https://www.genecards.org/cgi-bin/carddisp.pl?gene=RYR1</a>     |
| SDHB   | Succinate Dehydrogenase Complex Iron Sulfur Subunit B       | Protein Coding | 54 | GC01M018297 | 11.20557117 | <a href="https://www.genecards.org/cgi-bin/carddisp.pl?gene=SDHB">https://www.genecards.org/cgi-bin/carddisp.pl?gene=SDHB</a>     |
| CYP3A7 | Cytochrome P450 Family 3 Subfamily A Member 7               | Protein Coding | 47 | GC07M099705 | 11.19146252 | <a href="https://www.genecards.org/cgi-bin/carddisp.pl?gene=CYP3A7">https://www.genecards.org/cgi-bin/carddisp.pl?gene=CYP3A7</a> |
| ACSS2  | Acyl-CoA Synthetase Short Chain Family Member 2             | Protein Coding | 52 | GC20P034873 | 11.14794254 | <a href="https://www.genecards.org/cgi-bin/carddisp.pl?gene=ACSS2">https://www.genecards.org/cgi-bin/carddisp.pl?gene=ACSS2</a>   |
| ACAT1  | Acetyl-CoA Acetyltransferase 1                              | Protein Coding | 56 | GC11P108121 | 11.1475544  | <a href="https://www.genecards.org/cgi-bin/carddisp.pl?gene=ACAT1">https://www.genecards.org/cgi-bin/carddisp.pl?gene=ACAT1</a>   |
| CTH    | Cystathionine Gamma-Lyase                                   | Protein Coding | 56 | GC01P070411 | 11.13909245 | <a href="https://www.genecards.org/cgi-bin/carddisp.pl?gene=CTH">https://www.genecards.org/cgi-bin/carddisp.pl?gene=CTH</a>       |
| AR     | Androgen Receptor                                           | Protein Coding | 59 | GC0XP067544 | 11.10406113 | <a href="https://www.genecards.org/cgi-bin/carddisp.pl?gene=AR">https://www.genecards.org/cgi-bin/carddisp.pl?gene=AR</a>         |
| GNAS   | GNAS Complex Locus                                          | Protein Coding | 56 | GC20P058839 | 11.09564114 | <a href="https://www.genecards.org/cgi-bin/carddisp.pl?gene=GNAS">https://www.genecards.org/cgi-bin/carddisp.pl?gene=GNAS</a>     |
| GCSH   | Glycine Cleavage System Protein H                           | Protein Coding | 49 | GC16M081081 | 11.08065605 | <a href="https://www.genecards.org/cgi-bin/carddisp.pl?gene=GCSH">https://www.genecards.org/cgi-bin/carddisp.pl?gene=GCSH</a>     |
| PNPLA3 | Patatin Like Phospholipase Domain Containing 3              | Protein Coding | 48 | GC22P043923 | 11.0245285  | <a href="https://www.genecards.org/cgi-bin/carddisp.pl?gene=PNPLA3">https://www.genecards.org/cgi-bin/carddisp.pl?gene=PNPLA3</a> |
| FGF21  | Fibroblast Growth Factor 21                                 | Protein Coding | 46 | GC19P073194 | 10.99773979 | <a href="https://www.genecards.org/cgi-bin/carddisp.pl?gene=FGF21">https://www.genecards.org/cgi-bin/carddisp.pl?gene=FGF21</a>   |
| CPOX   | Coproporphyrinogen Oxidase                                  | Protein Coding | 51 | GC03M098576 | 10.99168968 | <a href="https://www.genecards.org/cgi-bin/carddisp.pl?gene=CPOX">https://www.genecards.org/cgi-bin/carddisp.pl?gene=CPOX</a>     |



|         |                                                                |                |    |             |             |                                                                                                                                     |
|---------|----------------------------------------------------------------|----------------|----|-------------|-------------|-------------------------------------------------------------------------------------------------------------------------------------|
| CNR1    | Cannabinoid Receptor 1                                         | Protein Coding | 53 | GC06M088139 | 10.95663166 | <a href="https://www.genecards.org/cgi-bin/carddisp.pl?gene=CNR1">https://www.genecards.org/cgi-bin/carddisp.pl?gene=CNR1</a>       |
| TAT     | Tyrosine Aminotransferase                                      | Protein Coding | 52 | GC16M071565 | 10.91602612 | <a href="https://www.genecards.org/cgi-bin/carddisp.pl?gene=TAT">https://www.genecards.org/cgi-bin/carddisp.pl?gene=TAT</a>         |
| GRIA2   | Glutamate Ionotropic Receptor AMPA Type Subunit 2              | Protein Coding | 58 | GC04P157204 | 10.91508484 | <a href="https://www.genecards.org/cgi-bin/carddisp.pl?gene=GRIA2">https://www.genecards.org/cgi-bin/carddisp.pl?gene=GRIA2</a>     |
| EHHADH  | Enoyl-CoA Hydratase And 3-Hydroxyacyl CoA Dehydrogenase        | Protein Coding | 50 | GC03M185190 | 10.90606213 | <a href="https://www.genecards.org/cgi-bin/carddisp.pl?gene=EHHADH">https://www.genecards.org/cgi-bin/carddisp.pl?gene=EHHADH</a>   |
| CFTR    | CF Transmembrane Conductance Regulator                         | Protein Coding | 59 | GC07P117287 | 10.90104771 | <a href="https://www.genecards.org/cgi-bin/carddisp.pl?gene=CFTR">https://www.genecards.org/cgi-bin/carddisp.pl?gene=CFTR</a>       |
| UPB1    | Beta-Ureidopropionase 1                                        | Protein Coding | 51 | GC22P024494 | 10.89578056 | <a href="https://www.genecards.org/cgi-bin/carddisp.pl?gene=UPB1">https://www.genecards.org/cgi-bin/carddisp.pl?gene=UPB1</a>       |
| PTGS1   | Prostaglandin-Endoperoxide Synthase 1                          | Protein Coding | 53 | GC09P122370 | 10.85939598 | <a href="https://www.genecards.org/cgi-bin/carddisp.pl?gene=PTGS1">https://www.genecards.org/cgi-bin/carddisp.pl?gene=PTGS1</a>     |
| RBP4    | Retinol Binding Protein 4                                      | Protein Coding | 52 | GC10M093591 | 10.77317238 | <a href="https://www.genecards.org/cgi-bin/carddisp.pl?gene=RBP4">https://www.genecards.org/cgi-bin/carddisp.pl?gene=RBP4</a>       |
| HMOX1   | Heme Oxygenase 1                                               | Protein Coding | 59 | GC22P035380 | 10.77141571 | <a href="https://www.genecards.org/cgi-bin/carddisp.pl?gene=HMOX1">https://www.genecards.org/cgi-bin/carddisp.pl?gene=HMOX1</a>     |
| POR     | Cytochrome P450 Oxidoreductase                                 | Protein Coding | 56 | GC07P075899 | 10.76194668 | <a href="https://www.genecards.org/cgi-bin/carddisp.pl?gene=POR">https://www.genecards.org/cgi-bin/carddisp.pl?gene=POR</a>         |
| MB      | Myoglobin                                                      | Protein Coding | 50 | GC22M035606 | 10.72063637 | <a href="https://www.genecards.org/cgi-bin/carddisp.pl?gene=MB">https://www.genecards.org/cgi-bin/carddisp.pl?gene=MB</a>           |
| SDHA    | Succinate Dehydrogenase Complex Flavoprotein Subunit A         | Protein Coding | 54 | GC05P000220 | 10.72057343 | <a href="https://www.genecards.org/cgi-bin/carddisp.pl?gene=SDHA">https://www.genecards.org/cgi-bin/carddisp.pl?gene=SDHA</a>       |
| ABCG2   | ATP Binding Cassette Subfamily G Member 2 (Junior Blood Group) | Protein Coding | 56 | GC04M088090 | 10.62441158 | <a href="https://www.genecards.org/cgi-bin/carddisp.pl?gene=ABCG2">https://www.genecards.org/cgi-bin/carddisp.pl?gene=ABCG2</a>     |
| DGAT1   | Diacylglycerol O-Acyltransferase 1                             | Protein Coding | 55 | GC08M144325 | 10.61318207 | <a href="https://www.genecards.org/cgi-bin/carddisp.pl?gene=DGAT1">https://www.genecards.org/cgi-bin/carddisp.pl?gene=DGAT1</a>     |
| CYP11B2 | Cytochrome P450 Family 11 Subfamily B Member 2                 | Protein Coding | 53 | GC08M142910 | 10.61117077 | <a href="https://www.genecards.org/cgi-bin/carddisp.pl?gene=CYP11B2">https://www.genecards.org/cgi-bin/carddisp.pl?gene=CYP11B2</a> |

|          |                                                    |                |    |             |             |                                                                                                                                       |
|----------|----------------------------------------------------|----------------|----|-------------|-------------|---------------------------------------------------------------------------------------------------------------------------------------|
| UGT2B7   | UDP Glucuronosyltransferase Family 2 Member B7     | Protein Coding | 50 | GC04P069051 | 10.59724236 | <a href="https://www.genecards.org/cgi-bin/carddisp.pl?gene=CYP11B2">https://www.genecards.org/cgi-bin/carddisp.pl?gene=CYP11B2</a>   |
| CYP27A1  | Cytochrome P450 Family 27 Subfamily A Member 1     | Protein Coding | 53 | GC02P218781 | 10.5703907  | <a href="https://www.genecards.org/cgi-bin/carddisp.pl?gene=UGT2B7">https://www.genecards.org/cgi-bin/carddisp.pl?gene=UGT2B7</a>     |
| SLC25A20 | Solute Carrier Family 25 Member 20                 | Protein Coding | 51 | GC03M048864 | 10.55376339 | <a href="https://www.genecards.org/cgi-bin/carddisp.pl?gene=CYP27A1">https://www.genecards.org/cgi-bin/carddisp.pl?gene=CYP27A1</a>   |
| PRL      | Prolactin                                          | Protein Coding | 50 | GC06M022287 | 10.54038048 | <a href="https://www.genecards.org/cgi-bin/carddisp.pl?gene=SLC25A20">https://www.genecards.org/cgi-bin/carddisp.pl?gene=SLC25A20</a> |
| UGT1A4   | UDP Glucuronosyltransferase Family 1 Member A4     | Protein Coding | 49 | GC02P233718 | 10.53925133 | <a href="https://www.genecards.org/cgi-bin/carddisp.pl?gene=PRL">https://www.genecards.org/cgi-bin/carddisp.pl?gene=PRL</a>           |
| VCAM1    | Vascular Cell Adhesion Molecule 1                  | Protein Coding | 52 | GC01P100719 | 10.49340725 | <a href="https://www.genecards.org/cgi-bin/carddisp.pl?gene=UGT1A4">https://www.genecards.org/cgi-bin/carddisp.pl?gene=UGT1A4</a>     |
| KYNU     | Kynureninase                                       | Protein Coding | 55 | GC02P142877 | 10.47294903 | <a href="https://www.genecards.org/cgi-bin/carddisp.pl?gene=VCAM1">https://www.genecards.org/cgi-bin/carddisp.pl?gene=VCAM1</a>       |
| SRD5A2   | Steroid 5 Alpha-Reductase 2                        | Protein Coding | 49 | GC02M031522 | 10.46125317 | <a href="https://www.genecards.org/cgi-bin/carddisp.pl?gene=KYNU">https://www.genecards.org/cgi-bin/carddisp.pl?gene=KYNU</a>         |
| TYMP     | Thymidine Phosphorylase                            | Protein Coding | 54 | GC22M050525 | 10.40325737 | <a href="https://www.genecards.org/cgi-bin/carddisp.pl?gene=SRD5A2">https://www.genecards.org/cgi-bin/carddisp.pl?gene=SRD5A2</a>     |
| MC4R     | Melanocortin 4 Receptor                            | Protein Coding | 53 | GC18M060371 | 10.38755989 | <a href="https://www.genecards.org/cgi-bin/carddisp.pl?gene=TYMP">https://www.genecards.org/cgi-bin/carddisp.pl?gene=TYMP</a>         |
| NDUFS4   | NADH:Ubiquinone Oxidoreductase Subunit S4          | Protein Coding | 50 | GC05P053560 | 10.37858486 | <a href="https://www.genecards.org/cgi-bin/carddisp.pl?gene=MC4R">https://www.genecards.org/cgi-bin/carddisp.pl?gene=MC4R</a>         |
| PCK2     | Phosphoenolpyruvate Carboxykinase 2, Mitochondrial | Protein Coding | 53 | GC14P024094 | 10.35907841 | <a href="https://www.genecards.org/cgi-bin/carddisp.pl?gene=NDUFS4">https://www.genecards.org/cgi-bin/carddisp.pl?gene=NDUFS4</a>     |
| SCD      | Stearoyl-CoA Desaturase                            | Protein Coding | 57 | GC10P100347 | 10.35372066 | <a href="https://www.genecards.org/cgi-bin/carddisp.pl?gene=PCK2">https://www.genecards.org/cgi-bin/carddisp.pl?gene=PCK2</a>         |
| GSR      | Glutathione-Disulfide Reductase                    | Protein Coding | 56 | GC08M030678 | 10.34006882 | <a href="https://www.genecards.org/cgi-bin/carddisp.pl?gene=SCD">https://www.genecards.org/cgi-bin/carddisp.pl?gene=SCD</a>           |
| GRIA1    | Glutamate Ionotropic Receptor AMPA Type Subunit 1  | Protein Coding | 56 | GC05P153467 | 10.3355341  | <a href="https://www.genecards.org/cgi-bin/carddisp.pl?gene=GSR">https://www.genecards.org/cgi-bin/carddisp.pl?gene=GSR</a>           |
|          |                                                    |                |    |             |             | <a href="https://www.genecards.org/cgi-bin/carddisp.pl?gene=GRIA1">https://www.genecards.org/cgi-bin/carddisp.pl?gene=GRIA1</a>       |

|         |                                                             |                |    |             |             |                                                                                                                                     |
|---------|-------------------------------------------------------------|----------------|----|-------------|-------------|-------------------------------------------------------------------------------------------------------------------------------------|
| HMGCS2  | 3-Hydroxy-3-Methylglutaryl-CoA Synthase 2                   | Protein Coding | 53 | GC01M119747 | 10.30286884 | <a href="https://www.genecards.org/cgi-bin/carddisp.pl?gene=HMGCS2">https://www.genecards.org/cgi-bin/carddisp.pl?gene=HMGCS2</a>   |
| FFAR2   | Free Fatty Acid Receptor 2                                  | Protein Coding | 48 | GC19P072731 | 10.30257607 | <a href="https://www.genecards.org/cgi-bin/carddisp.pl?gene=FFAR2">https://www.genecards.org/cgi-bin/carddisp.pl?gene=FFAR2</a>     |
| BLOC1S1 | Biogenesis Of Lysosomal Organelles Complex 1 Subunit 1      | Protein Coding | 42 | GC12P055950 | 10.30231476 | <a href="https://www.genecards.org/cgi-bin/carddisp.pl?gene=BLOC1S1">https://www.genecards.org/cgi-bin/carddisp.pl?gene=BLOC1S1</a> |
| GH1     | Growth Hormone 1                                            | Protein Coding | 50 | GC17M063917 | 10.25849533 | <a href="https://www.genecards.org/cgi-bin/carddisp.pl?gene=GH1">https://www.genecards.org/cgi-bin/carddisp.pl?gene=GH1</a>         |
| KCNJ1   | Potassium Inwardly Rectifying Channel Subfamily J Member 1  | Protein Coding | 54 | GC11M128741 | 10.25777531 | <a href="https://www.genecards.org/cgi-bin/carddisp.pl?gene=KCNJ1">https://www.genecards.org/cgi-bin/carddisp.pl?gene=KCNJ1</a>     |
| APP     | Amyloid Beta Precursor Protein                              | Protein Coding | 58 | GC21M025880 | 10.25391865 | <a href="https://www.genecards.org/cgi-bin/carddisp.pl?gene=APP">https://www.genecards.org/cgi-bin/carddisp.pl?gene=APP</a>         |
| EPHX2   | Epoxide Hydrolase 2                                         | Protein Coding | 53 | GC08P027490 | 10.23595047 | <a href="https://www.genecards.org/cgi-bin/carddisp.pl?gene=EPHX2">https://www.genecards.org/cgi-bin/carddisp.pl?gene=EPHX2</a>     |
| PTPN1   | Protein Tyrosine Phosphatase Non-Receptor Type 1            | Protein Coding | 57 | GC20P050510 | 10.23029804 | <a href="https://www.genecards.org/cgi-bin/carddisp.pl?gene=PTPN1">https://www.genecards.org/cgi-bin/carddisp.pl?gene=PTPN1</a>     |
| GOT2    | Glutamic-Oxaloacetic Transaminase 2                         | Protein Coding | 53 | GC16M058707 | 10.2194376  | <a href="https://www.genecards.org/cgi-bin/carddisp.pl?gene=GOT2">https://www.genecards.org/cgi-bin/carddisp.pl?gene=GOT2</a>       |
| KCNJ11  | Potassium Inwardly Rectifying Channel Subfamily J Member 11 | Protein Coding | 53 | GC11M017663 | 10.20500565 | <a href="https://www.genecards.org/cgi-bin/carddisp.pl?gene=KCNJ11">https://www.genecards.org/cgi-bin/carddisp.pl?gene=KCNJ11</a>   |
| NR113   | Nuclear Receptor Subfamily 1 Group 1 Member 3               | Protein Coding | 51 | GC01M161229 | 10.19310284 | <a href="https://www.genecards.org/cgi-bin/carddisp.pl?gene=NR113">https://www.genecards.org/cgi-bin/carddisp.pl?gene=NR113</a>     |
| CYP11B1 | Cytochrome P450 Family 11 Subfamily B Member 1              | Protein Coding | 52 | GC08M142872 | 10.17906284 | <a href="https://www.genecards.org/cgi-bin/carddisp.pl?gene=CYP11B1">https://www.genecards.org/cgi-bin/carddisp.pl?gene=CYP11B1</a> |
| HK2     | Hexokinase 2                                                | Protein Coding | 52 | GC02P074833 | 10.16204357 | <a href="https://www.genecards.org/cgi-bin/carddisp.pl?gene=HK2">https://www.genecards.org/cgi-bin/carddisp.pl?gene=HK2</a>         |
| ATP7A   | ATPase Copper Transporting Alpha                            | Protein Coding | 52 | GC0XP078031 | 10.16186047 | <a href="https://www.genecards.org/cgi-bin/carddisp.pl?gene=ATP7A">https://www.genecards.org/cgi-bin/carddisp.pl?gene=ATP7A</a>     |
| MTOR    | Mechanistic Target Of Rapamycin Kinase                      | Protein Coding | 62 | GC01M011106 | 10.12988853 | <a href="https://www.genecards.org/cgi-bin/carddisp.pl?gene=MTOR">https://www.genecards.org/cgi-bin/carddisp.pl?gene=MTOR</a>       |

|          |                                               |                |    |             |             |                                                                                                                                       |
|----------|-----------------------------------------------|----------------|----|-------------|-------------|---------------------------------------------------------------------------------------------------------------------------------------|
| IGFBP3   | Insulin Like Growth Factor Binding Protein 3  | Protein Coding | 54 | GC07M045912 | 10.12064362 | <a href="https://www.genecards.org/cgi-bin/carddisp.pl?gene=IGFBP3">https://www.genecards.org/cgi-bin/carddisp.pl?gene=IGFBP3</a>     |
| TCN2     | Transcobalamin 2                              | Protein Coding | 50 | GC22P044849 | 10.1113596  | <a href="https://www.genecards.org/cgi-bin/carddisp.pl?gene=TCN2">https://www.genecards.org/cgi-bin/carddisp.pl?gene=TCN2</a>         |
| BDNF     | Brain Derived Neurotrophic Factor             | Protein Coding | 56 | GC11M027654 | 10.10180569 | <a href="https://www.genecards.org/cgi-bin/carddisp.pl?gene=BDNF">https://www.genecards.org/cgi-bin/carddisp.pl?gene=BDNF</a>         |
| AKR1A1   | Aldo-Keto Reductase Family 1 Member A1        | Protein Coding | 51 | GC01P045550 | 10.08849812 | <a href="https://www.genecards.org/cgi-bin/carddisp.pl?gene=AKR1A1">https://www.genecards.org/cgi-bin/carddisp.pl?gene=AKR1A1</a>     |
| UCP1     | Uncoupling Protein 1                          | Protein Coding | 50 | GC04M140559 | 10.07172298 | <a href="https://www.genecards.org/cgi-bin/carddisp.pl?gene=UCP1">https://www.genecards.org/cgi-bin/carddisp.pl?gene=UCP1</a>         |
| SERPINA1 | Serpin Family A Member 1                      | Protein Coding | 56 | GC14M094376 | 10.03485966 | <a href="https://www.genecards.org/cgi-bin/carddisp.pl?gene=SERPINA1">https://www.genecards.org/cgi-bin/carddisp.pl?gene=SERPINA1</a> |
| TTR      | Transthyretin                                 | Protein Coding | 55 | GC18P031557 | 10.01377964 | <a href="https://www.genecards.org/cgi-bin/carddisp.pl?gene=TTR">https://www.genecards.org/cgi-bin/carddisp.pl?gene=TTR</a>           |
| CYP4F2   | Cytochrome P450 Family 4 Subfamily F Member 2 | Protein Coding | 50 | GC19M015878 | 9.978006363 | <a href="https://www.genecards.org/cgi-bin/carddisp.pl?gene=CYP4F2">https://www.genecards.org/cgi-bin/carddisp.pl?gene=CYP4F2</a>     |
| ALDH9A1  | Aldehyde Dehydrogenase 9 Family Member A1     | Protein Coding | 49 | GC01M165681 | 9.949209213 | <a href="https://www.genecards.org/cgi-bin/carddisp.pl?gene=ALDH9A1">https://www.genecards.org/cgi-bin/carddisp.pl?gene=ALDH9A1</a>   |
| AKT2     | AKT Serine/Threonine Kinase 2                 | Protein Coding | 61 | GC19M040230 | 9.924123764 | <a href="https://www.genecards.org/cgi-bin/carddisp.pl?gene=AKT2">https://www.genecards.org/cgi-bin/carddisp.pl?gene=AKT2</a>         |
| HNF1A    | HNF1 Homeobox A                               | Protein Coding | 53 | GC12P120978 | 9.914362907 | <a href="https://www.genecards.org/cgi-bin/carddisp.pl?gene=HNF1A">https://www.genecards.org/cgi-bin/carddisp.pl?gene=HNF1A</a>       |
| PPIG     | Peptidylprolyl Isomerase G                    | Protein Coding | 48 | GC02P169584 | 9.875458717 | <a href="https://www.genecards.org/cgi-bin/carddisp.pl?gene=PPIG">https://www.genecards.org/cgi-bin/carddisp.pl?gene=PPIG</a>         |
| LIPA     | Lipase A, Lysosomal Acid Type                 | Protein Coding | 55 | GC10M089213 | 9.852193832 | <a href="https://www.genecards.org/cgi-bin/carddisp.pl?gene=LIPA">https://www.genecards.org/cgi-bin/carddisp.pl?gene=LIPA</a>         |
| SCNN1G   | Sodium Channel Epithelial 1 Subunit Gamma     | Protein Coding | 53 | GC16P023182 | 9.823068619 | <a href="https://www.genecards.org/cgi-bin/carddisp.pl?gene=SCNN1G">https://www.genecards.org/cgi-bin/carddisp.pl?gene=SCNN1G</a>     |
| UROCI    | Urocanate Hydratase 1                         | Protein Coding | 46 | GC03M126481 | 9.821082115 | <a href="https://www.genecards.org/cgi-bin/carddisp.pl?gene=UROCI">https://www.genecards.org/cgi-bin/carddisp.pl?gene=UROCI</a>       |

|          |                                                                       |                |    |             |             |                                                                                                                                       |
|----------|-----------------------------------------------------------------------|----------------|----|-------------|-------------|---------------------------------------------------------------------------------------------------------------------------------------|
| PCK1     | Phosphoenolpyruvate Carboxykinase 1                                   | Protein Coding | 54 | GC20P057561 | 9.816595078 | <a href="https://www.genecards.org/cgi-bin/carddisp.pl?gene=PCK1">https://www.genecards.org/cgi-bin/carddisp.pl?gene=PCK1</a>         |
| NPY      | Neuropeptide Y                                                        | Protein Coding | 51 | GC07P024290 | 9.814024925 | <a href="https://www.genecards.org/cgi-bin/carddisp.pl?gene=NPY">https://www.genecards.org/cgi-bin/carddisp.pl?gene=NPY</a>           |
| SLC25A15 | Solute Carrier Family 25 Member 15                                    | Protein Coding | 50 | GC13P040789 | 9.767385483 | <a href="https://www.genecards.org/cgi-bin/carddisp.pl?gene=SLC25A15">https://www.genecards.org/cgi-bin/carddisp.pl?gene=SLC25A15</a> |
| MT-ND6   | Mitochondrially Encoded NADH:Ubiquinone Oxidoreductase Core Subunit 6 | Protein Coding | 38 | GCMTM014151 | 9.757986069 | <a href="https://www.genecards.org/cgi-bin/carddisp.pl?gene=MT-ND6">https://www.genecards.org/cgi-bin/carddisp.pl?gene=MT-ND6</a>     |
| HGD      | Homogentisate 1,2-Dioxygenase                                         | Protein Coding | 50 | GC03M120628 | 9.720542908 | <a href="https://www.genecards.org/cgi-bin/carddisp.pl?gene=HGD">https://www.genecards.org/cgi-bin/carddisp.pl?gene=HGD</a>           |
| SERPINA3 | Serpin Family A Member 3                                              | Protein Coding | 50 | GC14P094612 | 9.719280243 | <a href="https://www.genecards.org/cgi-bin/carddisp.pl?gene=SERPINA3">https://www.genecards.org/cgi-bin/carddisp.pl?gene=SERPINA3</a> |
| ASAH1    | N-Acylsphingosine Amidohydrolase 1                                    | Protein Coding | 56 | GC08M018055 | 9.712446213 | <a href="https://www.genecards.org/cgi-bin/carddisp.pl?gene=ASAH1">https://www.genecards.org/cgi-bin/carddisp.pl?gene=ASAH1</a>       |
| PDP1     | Pyruvate Dehydrogenase Phosphatase Catalytic Subunit 1                | Protein Coding | 54 | GC08P093857 | 9.703587532 | <a href="https://www.genecards.org/cgi-bin/carddisp.pl?gene=PDP1">https://www.genecards.org/cgi-bin/carddisp.pl?gene=PDP1</a>         |
| ABCC1    | ATP Binding Cassette Subfamily C Member 1                             | Protein Coding | 56 | GC16P015949 | 9.692297935 | <a href="https://www.genecards.org/cgi-bin/carddisp.pl?gene=ABCC1">https://www.genecards.org/cgi-bin/carddisp.pl?gene=ABCC1</a>       |
| DPYS     | Dihydropyrimidinase                                                   | Protein Coding | 52 | GC08M104331 | 9.645685196 | <a href="https://www.genecards.org/cgi-bin/carddisp.pl?gene=DPYS">https://www.genecards.org/cgi-bin/carddisp.pl?gene=DPYS</a>         |
| SLC5A6   | Solute Carrier Family 5 Member 6                                      | Protein Coding | 51 | GC02M027201 | 9.638032913 | <a href="https://www.genecards.org/cgi-bin/carddisp.pl?gene=SLC5A6">https://www.genecards.org/cgi-bin/carddisp.pl?gene=SLC5A6</a>     |
| TPI1     | Triosephosphate Isomerase 1                                           | Protein Coding | 54 | GC12P006867 | 9.596486092 | <a href="https://www.genecards.org/cgi-bin/carddisp.pl?gene=TPI1">https://www.genecards.org/cgi-bin/carddisp.pl?gene=TPI1</a>         |
| PRKAB1   | Protein Kinase AMP-Activated Non-Catalytic Subunit Beta 1             | Protein Coding | 53 | GC12P119632 | 9.594614029 | <a href="https://www.genecards.org/cgi-bin/carddisp.pl?gene=PRKAB1">https://www.genecards.org/cgi-bin/carddisp.pl?gene=PRKAB1</a>     |
| ABCB11   | ATP Binding Cassette Subfamily B Member 11                            | Protein Coding | 53 | GC02M168922 | 9.566059113 | <a href="https://www.genecards.org/cgi-bin/carddisp.pl?gene=ABCB11">https://www.genecards.org/cgi-bin/carddisp.pl?gene=ABCB11</a>     |
| TNFSF11  | TNF Superfamily Member 11                                             | Protein Coding | 56 | GC13P042562 | 9.559355736 | <a href="https://www.genecards.org/cgi-bin/carddisp.pl?gene=TNFSF11">https://www.genecards.org/cgi-bin/carddisp.pl?gene=TNFSF11</a>   |

|         |                                                          |                |    |             |             |                                                                                                                                     |
|---------|----------------------------------------------------------|----------------|----|-------------|-------------|-------------------------------------------------------------------------------------------------------------------------------------|
| PHKA2   | Phosphorylase Kinase Regulatory Subunit Alpha 2          | Protein Coding | 51 | GC0XM018892 | 9.55429554  | <a href="https://www.genecards.org/cgi-bin/carddisp.pl?gene=PHKA2">https://www.genecards.org/cgi-bin/carddisp.pl?gene=PHKA2</a>     |
| EPO     | Erythropoietin                                           | Protein Coding | 49 | GC07P100720 | 9.553358078 | <a href="https://www.genecards.org/cgi-bin/carddisp.pl?gene=EPO">https://www.genecards.org/cgi-bin/carddisp.pl?gene=EPO</a>         |
| EPRS1   | Glutamyl-Prolyl-TRNA Synthetase 1                        | Protein Coding | 50 | GC01M219969 | 9.552751541 | <a href="https://www.genecards.org/cgi-bin/carddisp.pl?gene=EPRS1">https://www.genecards.org/cgi-bin/carddisp.pl?gene=EPRS1</a>     |
| MAOA    | Monoamine Oxidase A                                      | Protein Coding | 55 | GC0XP043654 | 9.547767639 | <a href="https://www.genecards.org/cgi-bin/carddisp.pl?gene=MAOA">https://www.genecards.org/cgi-bin/carddisp.pl?gene=MAOA</a>       |
| ACAT2   | Acetyl-CoA Acetyltransferase 2                           | Protein Coding | 51 | GC06P160802 | 9.544605255 | <a href="https://www.genecards.org/cgi-bin/carddisp.pl?gene=ACAT2">https://www.genecards.org/cgi-bin/carddisp.pl?gene=ACAT2</a>     |
| SCARB1  | Scavenger Receptor Class B Member 1                      | Protein Coding | 55 | GC12M124776 | 9.489313126 | <a href="https://www.genecards.org/cgi-bin/carddisp.pl?gene=SCARB1">https://www.genecards.org/cgi-bin/carddisp.pl?gene=SCARB1</a>   |
| MT-CYB  | Mitochondrially Encoded Cytochrome B                     | Protein Coding | 38 | GCMTP014749 | 9.488700867 | <a href="https://www.genecards.org/cgi-bin/carddisp.pl?gene=MT-CYB">https://www.genecards.org/cgi-bin/carddisp.pl?gene=MT-CYB</a>   |
| BCL2    | BCL2 Apoptosis Regulator                                 | Protein Coding | 57 | GC18M063123 | 9.478082657 | <a href="https://www.genecards.org/cgi-bin/carddisp.pl?gene=BCL2">https://www.genecards.org/cgi-bin/carddisp.pl?gene=BCL2</a>       |
| BMP6    | Bone Morphogenetic Protein 6                             | Protein Coding | 50 | GC06P007726 | 9.47426033  | <a href="https://www.genecards.org/cgi-bin/carddisp.pl?gene=BMP6">https://www.genecards.org/cgi-bin/carddisp.pl?gene=BMP6</a>       |
| ANGPTL4 | Angiopoietin Like 4                                      | Protein Coding | 52 | GC19P008363 | 9.469734192 | <a href="https://www.genecards.org/cgi-bin/carddisp.pl?gene=ANGPTL4">https://www.genecards.org/cgi-bin/carddisp.pl?gene=ANGPTL4</a> |
| MAPK1   | Mitogen-Activated Protein Kinase 1                       | Protein Coding | 59 | GC22M021759 | 9.460432053 | <a href="https://www.genecards.org/cgi-bin/carddisp.pl?gene=MAPK1">https://www.genecards.org/cgi-bin/carddisp.pl?gene=MAPK1</a>     |
| SREBF2  | Sterol Regulatory Element Binding Transcription Factor 2 | Protein Coding | 50 | GC22P041833 | 9.449868202 | <a href="https://www.genecards.org/cgi-bin/carddisp.pl?gene=SREBF2">https://www.genecards.org/cgi-bin/carddisp.pl?gene=SREBF2</a>   |
| SLC6A8  | Solute Carrier Family 6 Member 8                         | Protein Coding | 53 | GC0XP153688 | 9.426587105 | <a href="https://www.genecards.org/cgi-bin/carddisp.pl?gene=SLC6A8">https://www.genecards.org/cgi-bin/carddisp.pl?gene=SLC6A8</a>   |
| PGR     | Progesterone Receptor                                    | Protein Coding | 56 | GC11M102130 | 9.400068283 | <a href="https://www.genecards.org/cgi-bin/carddisp.pl?gene=PGR">https://www.genecards.org/cgi-bin/carddisp.pl?gene=PGR</a>         |
| PKM     | Pyruvate Kinase M1/2                                     | Protein Coding | 56 | GC15M072199 | 9.394825935 | <a href="https://www.genecards.org/cgi-bin/carddisp.pl?gene=PKM">https://www.genecards.org/cgi-bin/carddisp.pl?gene=PKM</a>         |

|         |                                                                |                |    |             |             |                                                                                                                                     |
|---------|----------------------------------------------------------------|----------------|----|-------------|-------------|-------------------------------------------------------------------------------------------------------------------------------------|
| PRPS1   | Phosphoribosyl Pyrophosphate Synthetase 1                      | Protein Coding | 54 | GC0XP107628 | 9.386370659 | <a href="https://www.genecards.org/cgi-bin/carddisp.pl?gene=PRPS1">https://www.genecards.org/cgi-bin/carddisp.pl?gene=PRPS1</a>     |
| AHR     | Aryl Hydrocarbon Receptor                                      | Protein Coding | 54 | GC07P016916 | 9.34418869  | <a href="https://www.genecards.org/cgi-bin/carddisp.pl?gene=AHR">https://www.genecards.org/cgi-bin/carddisp.pl?gene=AHR</a>         |
| ACSS1   | Acyl-CoA Synthetase Short Chain Family Member 1                | Protein Coding | 47 | GC20M024986 | 9.330976486 | <a href="https://www.genecards.org/cgi-bin/carddisp.pl?gene=ACSS1">https://www.genecards.org/cgi-bin/carddisp.pl?gene=ACSS1</a>     |
| RRM2B   | Ribonucleotide Reductase Regulatory TP53 Inducible Subunit M2B | Protein Coding | 56 | GC08M102204 | 9.317185402 | <a href="https://www.genecards.org/cgi-bin/carddisp.pl?gene=RRM2B">https://www.genecards.org/cgi-bin/carddisp.pl?gene=RRM2B</a>     |
| B3GAT1  | Beta-1,3-Glucuronyltransferase 1                               | Protein Coding | 50 | GC11M134378 | 9.305902481 | <a href="https://www.genecards.org/cgi-bin/carddisp.pl?gene=B3GAT1">https://www.genecards.org/cgi-bin/carddisp.pl?gene=B3GAT1</a>   |
| MMP1    | Matrix Metalloproteinase 1                                     | Protein Coding | 57 | GC11M102810 | 9.27759552  | <a href="https://www.genecards.org/cgi-bin/carddisp.pl?gene=MMP1">https://www.genecards.org/cgi-bin/carddisp.pl?gene=MMP1</a>       |
| AOX1    | Aldehyde Oxidase 1                                             | Protein Coding | 51 | GC02P200585 | 9.275713921 | <a href="https://www.genecards.org/cgi-bin/carddisp.pl?gene=AOX1">https://www.genecards.org/cgi-bin/carddisp.pl?gene=AOX1</a>       |
| TFRC    | Transferrin Receptor                                           | Protein Coding | 58 | GC03M196056 | 9.241100311 | <a href="https://www.genecards.org/cgi-bin/carddisp.pl?gene=TFRC">https://www.genecards.org/cgi-bin/carddisp.pl?gene=TFRC</a>       |
| GAPDH   | Glyceraldehyde-3-Phosphate Dehydrogenase                       | Protein Coding | 57 | GC12P023539 | 9.224225998 | <a href="https://www.genecards.org/cgi-bin/carddisp.pl?gene=GAPDH">https://www.genecards.org/cgi-bin/carddisp.pl?gene=GAPDH</a>     |
| ALDH3A2 | Aldehyde Dehydrogenase 3 Family Member A2                      | Protein Coding | 52 | GC17P019648 | 9.220035553 | <a href="https://www.genecards.org/cgi-bin/carddisp.pl?gene=ALDH3A2">https://www.genecards.org/cgi-bin/carddisp.pl?gene=ALDH3A2</a> |
| CYP26A1 | Cytochrome P450 Family 26 Subfamily A Member 1                 | Protein Coding | 50 | GC10P093073 | 9.213516235 | <a href="https://www.genecards.org/cgi-bin/carddisp.pl?gene=CYP26A1">https://www.genecards.org/cgi-bin/carddisp.pl?gene=CYP26A1</a> |
| SELE    | Selectin E                                                     | Protein Coding | 50 | GC01M169722 | 9.211622238 | <a href="https://www.genecards.org/cgi-bin/carddisp.pl?gene=SELE">https://www.genecards.org/cgi-bin/carddisp.pl?gene=SELE</a>       |
| ODC1    | Ornithine Decarboxylase 1                                      | Protein Coding | 55 | GC02M010432 | 9.199753761 | <a href="https://www.genecards.org/cgi-bin/carddisp.pl?gene=ODC1">https://www.genecards.org/cgi-bin/carddisp.pl?gene=ODC1</a>       |
| SI      | Sucrase-Isomaltase                                             | Protein Coding | 51 | GC03M164978 | 9.185455322 | <a href="https://www.genecards.org/cgi-bin/carddisp.pl?gene=SI">https://www.genecards.org/cgi-bin/carddisp.pl?gene=SI</a>           |
| IL4     | Interleukin 4                                                  | Protein Coding | 53 | GC05P132673 | 9.176439285 | <a href="https://www.genecards.org/cgi-bin/carddisp.pl?gene=IL4">https://www.genecards.org/cgi-bin/carddisp.pl?gene=IL4</a>         |

|        |                                           |                |    |             |             |                                                                                                                                   |
|--------|-------------------------------------------|----------------|----|-------------|-------------|-----------------------------------------------------------------------------------------------------------------------------------|
| TGFB1  | Transforming Growth Factor Beta 1         | Protein Coding | 60 | GC19M041301 | 9.174732208 | <a href="https://www.genecards.org/cgi-bin/carddisp.pl?gene=TGFB1">https://www.genecards.org/cgi-bin/carddisp.pl?gene=TGFB1</a>   |
| CALCA  | Calcitonin Related Polypeptide Alpha      | Protein Coding | 50 | GC11M014945 | 9.166168213 | <a href="https://www.genecards.org/cgi-bin/carddisp.pl?gene=CALCA">https://www.genecards.org/cgi-bin/carddisp.pl?gene=CALCA</a>   |
| SARDH  | Sarcosine Dehydrogenase                   | Protein Coding | 48 | GC09M133663 | 9.150572777 | <a href="https://www.genecards.org/cgi-bin/carddisp.pl?gene=SARDH">https://www.genecards.org/cgi-bin/carddisp.pl?gene=SARDH</a>   |
| IRS2   | Insulin Receptor Substrate 2              | Protein Coding | 51 | GC13M109752 | 9.141462326 | <a href="https://www.genecards.org/cgi-bin/carddisp.pl?gene=IRS2">https://www.genecards.org/cgi-bin/carddisp.pl?gene=IRS2</a>     |
| TSHR   | Thyroid Stimulating Hormone Receptor      | Protein Coding | 54 | GC14P080954 | 9.134458542 | <a href="https://www.genecards.org/cgi-bin/carddisp.pl?gene=TSHR">https://www.genecards.org/cgi-bin/carddisp.pl?gene=TSHR</a>     |
| ABAT   | 4-Aminobutyrate Aminotransferase          | Protein Coding | 52 | GC16P008674 | 9.114062309 | <a href="https://www.genecards.org/cgi-bin/carddisp.pl?gene=ABAT">https://www.genecards.org/cgi-bin/carddisp.pl?gene=ABAT</a>     |
| PLA2G7 | Phospholipase A2 Group VII                | Protein Coding | 56 | GC06M046704 | 9.094242096 | <a href="https://www.genecards.org/cgi-bin/carddisp.pl?gene=PLA2G7">https://www.genecards.org/cgi-bin/carddisp.pl?gene=PLA2G7</a> |
| PPOX   | Protoporphyrinogen Oxidase                | Protein Coding | 50 | GC01P161793 | 9.073926926 | <a href="https://www.genecards.org/cgi-bin/carddisp.pl?gene=PPOX">https://www.genecards.org/cgi-bin/carddisp.pl?gene=PPOX</a>     |
| BSND   | Barttin CLCNK Type Accessory Subunit Beta | Protein Coding | 46 | GC01P054998 | 9.067605019 | <a href="https://www.genecards.org/cgi-bin/carddisp.pl?gene=BSND">https://www.genecards.org/cgi-bin/carddisp.pl?gene=BSND</a>     |
| NFE2L2 | NFE2 Like BZIP Transcription Factor 2     | Protein Coding | 57 | GC02M177227 | 9.067396164 | <a href="https://www.genecards.org/cgi-bin/carddisp.pl?gene=NFE2L2">https://www.genecards.org/cgi-bin/carddisp.pl?gene=NFE2L2</a> |
| TH     | Tyrosine Hydroxylase                      | Protein Coding | 57 | GC11M002163 | 9.036359787 | <a href="https://www.genecards.org/cgi-bin/carddisp.pl?gene=TH">https://www.genecards.org/cgi-bin/carddisp.pl?gene=TH</a>         |
| GLP1R  | Glucagon Like Peptide 1 Receptor          | Protein Coding | 53 | GC06P039048 | 9.011398315 | <a href="https://www.genecards.org/cgi-bin/carddisp.pl?gene=GLP1R">https://www.genecards.org/cgi-bin/carddisp.pl?gene=GLP1R</a>   |
| B2M    | Beta-2-Microglobulin                      | Protein Coding | 56 | GC15P044711 | 9.009315491 | <a href="https://www.genecards.org/cgi-bin/carddisp.pl?gene=B2M">https://www.genecards.org/cgi-bin/carddisp.pl?gene=B2M</a>       |
| ABCC4  | ATP Binding Cassette Subfamily C Member 4 | Protein Coding | 52 | GC13M095019 | 9.002803802 | <a href="https://www.genecards.org/cgi-bin/carddisp.pl?gene=ABCC4">https://www.genecards.org/cgi-bin/carddisp.pl?gene=ABCC4</a>   |
| FECH   | Ferrochelatase                            | Protein Coding | 53 | GC18M057544 | 8.987259865 | <a href="https://www.genecards.org/cgi-bin/carddisp.pl?gene=FECH">https://www.genecards.org/cgi-bin/carddisp.pl?gene=FECH</a>     |



|         |                                                 |                |    |             |             |                                                                                                                                     |
|---------|-------------------------------------------------|----------------|----|-------------|-------------|-------------------------------------------------------------------------------------------------------------------------------------|
| SCNN1B  | Sodium Channel Epithelial 1 Subunit Beta        | Protein Coding | 55 | GC16P023278 | 8.966176987 | <a href="https://www.genecards.org/cgi-bin/carddisp.pl?gene=SCNN1B">https://www.genecards.org/cgi-bin/carddisp.pl?gene=SCNN1B</a>   |
| CAV1    | Caveolin 1                                      | Protein Coding | 55 | GC07P116524 | 8.965511322 | <a href="https://www.genecards.org/cgi-bin/carddisp.pl?gene=CAV1">https://www.genecards.org/cgi-bin/carddisp.pl?gene=CAV1</a>       |
| PLA2G6  | Phospholipase A2 Group VI                       | Protein Coding | 54 | GC22M063106 | 8.922856331 | <a href="https://www.genecards.org/cgi-bin/carddisp.pl?gene=PLA2G6">https://www.genecards.org/cgi-bin/carddisp.pl?gene=PLA2G6</a>   |
| SLC9A3  | Solute Carrier Family 9 Member A3               | Protein Coding | 54 | GC05M000472 | 8.890376091 | <a href="https://www.genecards.org/cgi-bin/carddisp.pl?gene=SLC9A3">https://www.genecards.org/cgi-bin/carddisp.pl?gene=SLC9A3</a>   |
| KRAS    | KRAS Proto-Oncogene, GTPase                     | Protein Coding | 59 | GC12M025204 | 8.88931179  | <a href="https://www.genecards.org/cgi-bin/carddisp.pl?gene=KRAS">https://www.genecards.org/cgi-bin/carddisp.pl?gene=KRAS</a>       |
| ACSS3   | Acyl-CoA Synthetase Short Chain Family Member 3 | Protein Coding | 44 | GC12P080936 | 8.88329792  | <a href="https://www.genecards.org/cgi-bin/carddisp.pl?gene=ACSS3">https://www.genecards.org/cgi-bin/carddisp.pl?gene=ACSS3</a>     |
| PNLIP   | Pancreatic Lipase                               | Protein Coding | 55 | GC10P116545 | 8.861320496 | <a href="https://www.genecards.org/cgi-bin/carddisp.pl?gene=PNLIP">https://www.genecards.org/cgi-bin/carddisp.pl?gene=PNLIP</a>     |
| WNK1    | WNK Lysine Deficient Protein Kinase 1           | Protein Coding | 55 | GC12P000733 | 8.852413177 | <a href="https://www.genecards.org/cgi-bin/carddisp.pl?gene=WNK1">https://www.genecards.org/cgi-bin/carddisp.pl?gene=WNK1</a>       |
| AMACR   | Alpha-Methylacyl-CoA Racemase                   | Protein Coding | 51 | GC05M033986 | 8.844797134 | <a href="https://www.genecards.org/cgi-bin/carddisp.pl?gene=AMACR">https://www.genecards.org/cgi-bin/carddisp.pl?gene=AMACR</a>     |
| TPO     | Thyroid Peroxidase                              | Protein Coding | 56 | GC02P001374 | 8.836055756 | <a href="https://www.genecards.org/cgi-bin/carddisp.pl?gene=TPO">https://www.genecards.org/cgi-bin/carddisp.pl?gene=TPO</a>         |
| PLTP    | Phospholipid Transfer Protein                   | Protein Coding | 51 | GC20M045898 | 8.819312096 | <a href="https://www.genecards.org/cgi-bin/carddisp.pl?gene=PLTP">https://www.genecards.org/cgi-bin/carddisp.pl?gene=PLTP</a>       |
| PLA2G2A | Phospholipase A2 Group IIA                      | Protein Coding | 53 | GC01M019975 | 8.813098907 | <a href="https://www.genecards.org/cgi-bin/carddisp.pl?gene=PLA2G2A">https://www.genecards.org/cgi-bin/carddisp.pl?gene=PLA2G2A</a> |
| CBLIF   | Cobalamin Binding Intrinsic Factor              | Protein Coding | 50 | GC11M059829 | 8.777448654 | <a href="https://www.genecards.org/cgi-bin/carddisp.pl?gene=CBLIF">https://www.genecards.org/cgi-bin/carddisp.pl?gene=CBLIF</a>     |
| ALOX12  | Arachidonate 12-Lipoxygenase, 12S Type          | Protein Coding | 51 | GC17P006995 | 8.752995491 | <a href="https://www.genecards.org/cgi-bin/carddisp.pl?gene=ALOX12">https://www.genecards.org/cgi-bin/carddisp.pl?gene=ALOX12</a>   |
| PEPD    | Peptidase D                                     | Protein Coding | 52 | GC19M033386 | 8.72979641  | <a href="https://www.genecards.org/cgi-bin/carddisp.pl?gene=PEPD">https://www.genecards.org/cgi-bin/carddisp.pl?gene=PEPD</a>       |

|          |                                                                          |                |    |             |             |                                                                                                                                       |
|----------|--------------------------------------------------------------------------|----------------|----|-------------|-------------|---------------------------------------------------------------------------------------------------------------------------------------|
| MAOB     | Monoamine Oxidase B                                                      | Protein Coding | 51 | GC0XM043766 | 8.728715897 | <a href="https://www.genecards.org/cgi-bin/carddisp.pl?gene=MAOB">https://www.genecards.org/cgi-bin/carddisp.pl?gene=MAOB</a>         |
| SUCLG1   | Succinate-CoA Ligase GDP/ADP-Forming Subunit Alpha                       | Protein Coding | 53 | GC02M084423 | 8.726793289 | <a href="https://www.genecards.org/cgi-bin/carddisp.pl?gene=SUCLG1">https://www.genecards.org/cgi-bin/carddisp.pl?gene=SUCLG1</a>     |
| NR1H3    | Nuclear Receptor Subfamily 1 Group H Member 3                            | Protein Coding | 53 | GC11P047248 | 8.693900108 | <a href="https://www.genecards.org/cgi-bin/carddisp.pl?gene=NR1H3">https://www.genecards.org/cgi-bin/carddisp.pl?gene=NR1H3</a>       |
| ALDOA    | Aldolase, Fructose-Bisphosphate A                                        | Protein Coding | 55 | GC16P030064 | 8.690598488 | <a href="https://www.genecards.org/cgi-bin/carddisp.pl?gene=ALDOA">https://www.genecards.org/cgi-bin/carddisp.pl?gene=ALDOA</a>       |
| TALDO1   | Transaldolase 1                                                          | Protein Coding | 53 | GC11P002101 | 8.67280674  | <a href="https://www.genecards.org/cgi-bin/carddisp.pl?gene=TALDO1">https://www.genecards.org/cgi-bin/carddisp.pl?gene=TALDO1</a>     |
| PIK3C2A  | Phosphatidylinositol-4-Phosphate 3-Kinase Catalytic Subunit Type 2 Alpha | Protein Coding | 54 | GC11M017656 | 8.672620773 | <a href="https://www.genecards.org/cgi-bin/carddisp.pl?gene=PIK3C2A">https://www.genecards.org/cgi-bin/carddisp.pl?gene=PIK3C2A</a>   |
| MIR132   | MicroRNA 132                                                             | RNA Gene       | 24 | GC17M002049 | 8.668548584 | <a href="https://www.genecards.org/cgi-bin/carddisp.pl?gene=MIR132">https://www.genecards.org/cgi-bin/carddisp.pl?gene=MIR132</a>     |
| ALDH7A1  | Aldehyde Dehydrogenase 7 Family Member A1                                | Protein Coding | 55 | GC05M126541 | 8.663873672 | <a href="https://www.genecards.org/cgi-bin/carddisp.pl?gene=ALDH7A1">https://www.genecards.org/cgi-bin/carddisp.pl?gene=ALDH7A1</a>   |
| IGF1R    | Insulin Like Growth Factor 1 Receptor                                    | Protein Coding | 61 | GC15P098648 | 8.65890789  | <a href="https://www.genecards.org/cgi-bin/carddisp.pl?gene=IGF1R">https://www.genecards.org/cgi-bin/carddisp.pl?gene=IGF1R</a>       |
| SERPINA6 | Serpin Family A Member 6                                                 | Protein Coding | 52 | GC14M103107 | 8.658004761 | <a href="https://www.genecards.org/cgi-bin/carddisp.pl?gene=SERPINA6">https://www.genecards.org/cgi-bin/carddisp.pl?gene=SERPINA6</a> |
| MYC      | MYC Proto-Oncogene, BHLH Transcription Factor                            | Protein Coding | 59 | GC08P127735 | 8.656543732 | <a href="https://www.genecards.org/cgi-bin/carddisp.pl?gene=MYC">https://www.genecards.org/cgi-bin/carddisp.pl?gene=MYC</a>           |
| FAS      | Fas Cell Surface Death Receptor                                          | Protein Coding | 57 | GC10P094616 | 8.649011612 | <a href="https://www.genecards.org/cgi-bin/carddisp.pl?gene=FAS">https://www.genecards.org/cgi-bin/carddisp.pl?gene=FAS</a>           |
| HAL      | Histidine Ammonia-Lyase                                                  | Protein Coding | 50 | GC12M095972 | 8.647676468 | <a href="https://www.genecards.org/cgi-bin/carddisp.pl?gene=HAL">https://www.genecards.org/cgi-bin/carddisp.pl?gene=HAL</a>           |
| AKR1C3   | Aldo-Keto Reductase Family 1 Member C3                                   | Protein Coding | 52 | GC10P005035 | 8.643188477 | <a href="https://www.genecards.org/cgi-bin/carddisp.pl?gene=AKR1C3">https://www.genecards.org/cgi-bin/carddisp.pl?gene=AKR1C3</a>     |
| VEGFA    | Vascular Endothelial Growth Factor A                                     | Protein Coding | 56 | GC06P043770 | 8.640114784 | <a href="https://www.genecards.org/cgi-bin/carddisp.pl?gene=VEGFA">https://www.genecards.org/cgi-bin/carddisp.pl?gene=VEGFA</a>       |

|        |                                                |                |    |             |             |                                                                                                                                   |
|--------|------------------------------------------------|----------------|----|-------------|-------------|-----------------------------------------------------------------------------------------------------------------------------------|
| NPPA   | Natriuretic Peptide A                          | Protein Coding | 52 | GC01M011846 | 8.623929024 | <a href="https://www.genecards.org/cgi-bin/carddisp.pl?gene=NPPA">https://www.genecards.org/cgi-bin/carddisp.pl?gene=NPPA</a>     |
| IGF2   | Insulin Like Growth Factor 2                   | Protein Coding | 55 | GC11M004506 | 8.617035866 | <a href="https://www.genecards.org/cgi-bin/carddisp.pl?gene=IGF2">https://www.genecards.org/cgi-bin/carddisp.pl?gene=IGF2</a>     |
| NAT1   | N-Acetyltransferase 1                          | Protein Coding | 50 | GC08P018183 | 8.583248138 | <a href="https://www.genecards.org/cgi-bin/carddisp.pl?gene=NAT1">https://www.genecards.org/cgi-bin/carddisp.pl?gene=NAT1</a>     |
| CYB5A  | Cytochrome B5 Type A                           | Protein Coding | 50 | GC18M074250 | 8.580019951 | <a href="https://www.genecards.org/cgi-bin/carddisp.pl?gene=CYB5A">https://www.genecards.org/cgi-bin/carddisp.pl?gene=CYB5A</a>   |
| SOD2   | Superoxide Dismutase 2                         | Protein Coding | 53 | GC06M159669 | 8.579874039 | <a href="https://www.genecards.org/cgi-bin/carddisp.pl?gene=SOD2">https://www.genecards.org/cgi-bin/carddisp.pl?gene=SOD2</a>     |
| TLR4   | Toll Like Receptor 4                           | Protein Coding | 58 | GC09P117704 | 8.57736969  | <a href="https://www.genecards.org/cgi-bin/carddisp.pl?gene=TLR4">https://www.genecards.org/cgi-bin/carddisp.pl?gene=TLR4</a>     |
| AGK    | Acylglycerol Kinase                            | Protein Coding | 47 | GC07P141551 | 8.569777489 | <a href="https://www.genecards.org/cgi-bin/carddisp.pl?gene=AGK">https://www.genecards.org/cgi-bin/carddisp.pl?gene=AGK</a>       |
| AGPAT2 | 1-Acylglycerol-3-Phosphate O-Acyltransferase 2 | Protein Coding | 52 | GC09M136673 | 8.565602303 | <a href="https://www.genecards.org/cgi-bin/carddisp.pl?gene=AGPAT2">https://www.genecards.org/cgi-bin/carddisp.pl?gene=AGPAT2</a> |
| SRD5A1 | Steroid 5 Alpha-Reductase 1                    | Protein Coding | 50 | GC05P006633 | 8.563120842 | <a href="https://www.genecards.org/cgi-bin/carddisp.pl?gene=SRD5A1">https://www.genecards.org/cgi-bin/carddisp.pl?gene=SRD5A1</a> |
| FBN1   | Fibrillin 1                                    | Protein Coding | 53 | GC15M048408 | 8.536642075 | <a href="https://www.genecards.org/cgi-bin/carddisp.pl?gene=FBN1">https://www.genecards.org/cgi-bin/carddisp.pl?gene=FBN1</a>     |
| IL5    | Interleukin 5                                  | Protein Coding | 52 | GC05M132541 | 8.535798073 | <a href="https://www.genecards.org/cgi-bin/carddisp.pl?gene=IL5">https://www.genecards.org/cgi-bin/carddisp.pl?gene=IL5</a>       |
| GLS    | Glutaminase                                    | Protein Coding | 56 | GC02P190880 | 8.528938293 | <a href="https://www.genecards.org/cgi-bin/carddisp.pl?gene=GLS">https://www.genecards.org/cgi-bin/carddisp.pl?gene=GLS</a>       |
| EDN1   | Endothelin 1                                   | Protein Coding | 55 | GC06P012256 | 8.526630402 | <a href="https://www.genecards.org/cgi-bin/carddisp.pl?gene=EDN1">https://www.genecards.org/cgi-bin/carddisp.pl?gene=EDN1</a>     |
| GALC   | Galactosylceramidase                           | Protein Coding | 51 | GC14M087837 | 8.512210846 | <a href="https://www.genecards.org/cgi-bin/carddisp.pl?gene=GALC">https://www.genecards.org/cgi-bin/carddisp.pl?gene=GALC</a>     |
| MMP9   | Matrix Metalloproteinase 9                     | Protein Coding | 61 | GC20P046008 | 8.467338562 | <a href="https://www.genecards.org/cgi-bin/carddisp.pl?gene=MMP9">https://www.genecards.org/cgi-bin/carddisp.pl?gene=MMP9</a>     |

|         |                                                 |                |    |             |             |                                                                                                                                     |
|---------|-------------------------------------------------|----------------|----|-------------|-------------|-------------------------------------------------------------------------------------------------------------------------------------|
| SPP1    | Secreted Phosphoprotein 1                       | Protein Coding | 53 | GC04P087975 | 8.406263351 | <a href="https://www.genecards.org/cgi-bin/carddisp.pl?gene=SPP1">https://www.genecards.org/cgi-bin/carddisp.pl?gene=SPP1</a>       |
| SOAT1   | Sterol O-Acyltransferase 1                      | Protein Coding | 51 | GC01P179262 | 8.406112671 | <a href="https://www.genecards.org/cgi-bin/carddisp.pl?gene=SOAT1">https://www.genecards.org/cgi-bin/carddisp.pl?gene=SOAT1</a>     |
| FGFR1   | Fibroblast Growth Factor Receptor 1             | Protein Coding | 63 | GC08M038400 | 8.392232895 | <a href="https://www.genecards.org/cgi-bin/carddisp.pl?gene=FGFR1">https://www.genecards.org/cgi-bin/carddisp.pl?gene=FGFR1</a>     |
| MME     | Membrane Metalloendopeptidase                   | Protein Coding | 57 | GC03P155024 | 8.376724243 | <a href="https://www.genecards.org/cgi-bin/carddisp.pl?gene=MME">https://www.genecards.org/cgi-bin/carddisp.pl?gene=MME</a>         |
| FOXO3   | Forkhead Box O3                                 | Protein Coding | 53 | GC06P108559 | 8.376056671 | <a href="https://www.genecards.org/cgi-bin/carddisp.pl?gene=FOXO3">https://www.genecards.org/cgi-bin/carddisp.pl?gene=FOXO3</a>     |
| GLUL    | Glutamate-Ammonia Ligase                        | Protein Coding | 55 | GC01M182378 | 8.333607674 | <a href="https://www.genecards.org/cgi-bin/carddisp.pl?gene=GLUL">https://www.genecards.org/cgi-bin/carddisp.pl?gene=GLUL</a>       |
| CA2     | Carbonic Anhydrase 2                            | Protein Coding | 59 | GC08P085463 | 8.320440292 | <a href="https://www.genecards.org/cgi-bin/carddisp.pl?gene=CA2">https://www.genecards.org/cgi-bin/carddisp.pl?gene=CA2</a>         |
| GLA     | Galactosidase Alpha                             | Protein Coding | 56 | GC0XM101393 | 8.318837166 | <a href="https://www.genecards.org/cgi-bin/carddisp.pl?gene=GLA">https://www.genecards.org/cgi-bin/carddisp.pl?gene=GLA</a>         |
| ALAD    | Aminolevulinate Dehydratase                     | Protein Coding | 53 | GC09M113386 | 8.308020592 | <a href="https://www.genecards.org/cgi-bin/carddisp.pl?gene=ALAD">https://www.genecards.org/cgi-bin/carddisp.pl?gene=ALAD</a>       |
| UGT2B15 | UDP Glucuronosyltransferase Family 2 Member B15 | Protein Coding | 50 | GC04M068646 | 8.296926498 | <a href="https://www.genecards.org/cgi-bin/carddisp.pl?gene=UGT2B15">https://www.genecards.org/cgi-bin/carddisp.pl?gene=UGT2B15</a> |
| ACOX1   | Acyl-CoA Oxidase 1                              | Protein Coding | 52 | GC17M075941 | 8.251636505 | <a href="https://www.genecards.org/cgi-bin/carddisp.pl?gene=ACOX1">https://www.genecards.org/cgi-bin/carddisp.pl?gene=ACOX1</a>     |
| AKR1C2  | Aldo-Keto Reductase Family 1 Member C2          | Protein Coding | 52 | GC10M004987 | 8.24772644  | <a href="https://www.genecards.org/cgi-bin/carddisp.pl?gene=AKR1C2">https://www.genecards.org/cgi-bin/carddisp.pl?gene=AKR1C2</a>   |
| IGF2R   | Insulin Like Growth Factor 2 Receptor           | Protein Coding | 52 | GC06P159969 | 8.232765198 | <a href="https://www.genecards.org/cgi-bin/carddisp.pl?gene=IGF2R">https://www.genecards.org/cgi-bin/carddisp.pl?gene=IGF2R</a>     |
| LPA     | Lipoprotein(A)                                  | Protein Coding | 44 | GC06M160531 | 8.226680756 | <a href="https://www.genecards.org/cgi-bin/carddisp.pl?gene=LPA">https://www.genecards.org/cgi-bin/carddisp.pl?gene=LPA</a>         |
| AKR1B1  | Aldo-Keto Reductase Family 1 Member B           | Protein Coding | 53 | GC07M134442 | 8.226289749 | <a href="https://www.genecards.org/cgi-bin/carddisp.pl?gene=MMP9">https://www.genecards.org/cgi-bin/carddisp.pl?gene=MMP9</a>       |

|          |                                                       |                |    |             |             |                                                                                                                                     |
|----------|-------------------------------------------------------|----------------|----|-------------|-------------|-------------------------------------------------------------------------------------------------------------------------------------|
| CLOCK    | Clock Circadian Regulator                             | Protein Coding | 51 | GC04M055427 | 8.168092728 | <a href="https://www.genecards.org/cgi-bin/carddisp.pl?gene=AKR1B1">https://www.genecards.org/cgi-bin/carddisp.pl?gene=AKR1B1</a>   |
| GPX1     | Glutathione Peroxidase 1                              | Protein Coding | 52 | GC03M051566 | 8.151756287 | <a href="https://www.genecards.org/cgi-bin/carddisp.pl?gene=CLOCK">https://www.genecards.org/cgi-bin/carddisp.pl?gene=CLOCK</a>     |
| MIR22    | MicroRNA 22                                           | RNA Gene       | 23 | GC17M001713 | 8.137874603 | <a href="https://www.genecards.org/cgi-bin/carddisp.pl?gene=GPX1">https://www.genecards.org/cgi-bin/carddisp.pl?gene=GPX1</a>       |
| ALDH1A1  | Aldehyde Dehydrogenase 1 Family Member A1             | Protein Coding | 54 | GC09M072900 | 8.133259773 | <a href="https://www.genecards.org/cgi-bin/carddisp.pl?gene=MIR22">https://www.genecards.org/cgi-bin/carddisp.pl?gene=MIR22</a>     |
| COG2     | Component Of Oligomeric Golgi Complex 2               | Protein Coding | 47 | GC01P230642 | 8.130456924 | <a href="https://www.genecards.org/cgi-bin/carddisp.pl?gene=ALDH1A1">https://www.genecards.org/cgi-bin/carddisp.pl?gene=ALDH1A1</a> |
| UROD     | Uroporphyrinogen Decarboxylase                        | Protein Coding | 52 | GC01P045458 | 8.115438461 | <a href="https://www.genecards.org/cgi-bin/carddisp.pl?gene=COG2">https://www.genecards.org/cgi-bin/carddisp.pl?gene=COG2</a>       |
| BRCA1    | BRCA1 DNA Repair Associated                           | Protein Coding | 56 | GC17M043044 | 8.113157272 | <a href="https://www.genecards.org/cgi-bin/carddisp.pl?gene=UROD">https://www.genecards.org/cgi-bin/carddisp.pl?gene=UROD</a>       |
| CLCNKA   | Chloride Voltage-Gated Channel Ka                     | Protein Coding | 47 | GC01P016018 | 8.101045609 | <a href="https://www.genecards.org/cgi-bin/carddisp.pl?gene=BRCA1">https://www.genecards.org/cgi-bin/carddisp.pl?gene=BRCA1</a>     |
| EPM2A    | EPM2A Glucan Phosphatase, Laforin                     | Protein Coding | 50 | GC06M145382 | 8.040835381 | <a href="https://www.genecards.org/cgi-bin/carddisp.pl?gene=CLCNKA">https://www.genecards.org/cgi-bin/carddisp.pl?gene=CLCNKA</a>   |
| JUN      | Jun Proto-Oncogene, AP-1 Transcription Factor Subunit | Protein Coding | 55 | GC01M058780 | 8.033901215 | <a href="https://www.genecards.org/cgi-bin/carddisp.pl?gene=EPM2A">https://www.genecards.org/cgi-bin/carddisp.pl?gene=EPM2A</a>     |
| SLC52A2  | Solute Carrier Family 52 Member 2                     | Protein Coding | 46 | GC08P144333 | 8.015874863 | <a href="https://www.genecards.org/cgi-bin/carddisp.pl?gene=JUN">https://www.genecards.org/cgi-bin/carddisp.pl?gene=JUN</a>         |
| AHSG     | Alpha 2-HS Glycoprotein                               | Protein Coding | 51 | GC03P186636 | 8.000261307 | <a href="https://www.genecards.org/cgi-bin/carddisp.pl?gene=SLC52A2">https://www.genecards.org/cgi-bin/carddisp.pl?gene=SLC52A2</a> |
| FFAR3    | Free Fatty Acid Receptor 3                            | Protein Coding | 44 | GC19P073871 | 7.985510826 | <a href="https://www.genecards.org/cgi-bin/carddisp.pl?gene=AHSG">https://www.genecards.org/cgi-bin/carddisp.pl?gene=AHSG</a>       |
| DSP      | Desmoplakin                                           | Protein Coding | 57 | GC06P007541 | 7.967627048 | <a href="https://www.genecards.org/cgi-bin/carddisp.pl?gene=FFAR3">https://www.genecards.org/cgi-bin/carddisp.pl?gene=FFAR3</a>     |
| TNFRSF11 | TNF Receptor Superfamily Member 11b                   | Protein Coding | 54 | GC08M118923 | 7.947682381 | <a href="https://www.genecards.org/cgi-bin/carddisp.pl?gene=DSP">https://www.genecards.org/cgi-bin/carddisp.pl?gene=DSP</a>         |

| Gene Symbol | Gene Name                                         | Category       | Chromosome | Gene ID     | RefSeq ID   | Accession    | URL                                                                                                                             |
|-------------|---------------------------------------------------|----------------|------------|-------------|-------------|--------------|---------------------------------------------------------------------------------------------------------------------------------|
| ACO1        | Aconitase 1                                       | Protein Coding | 51         | GC09P032374 | 7.935599327 | ne=TNFRSF11B | <a href="https://www.genecards.org/cgi-bin/carddisp.pl?gene=ACO1">https://www.genecards.org/cgi-bin/carddisp.pl?gene=ACO1</a>   |
| APC         | APC Regulator Of WNT Signaling Pathway            | Protein Coding | 56         | GC05P112707 | 7.932646751 | ne=APC       | <a href="https://www.genecards.org/cgi-bin/carddisp.pl?gene=APC">https://www.genecards.org/cgi-bin/carddisp.pl?gene=APC</a>     |
| CASP8       | Caspase 8                                         | Protein Coding | 59         | GC02P201233 | 7.92381525  | ne=CASP8     | <a href="https://www.genecards.org/cgi-bin/carddisp.pl?gene=CASP8">https://www.genecards.org/cgi-bin/carddisp.pl?gene=CASP8</a> |
| GHR         | Growth Hormone Receptor                           | Protein Coding | 53         | GC05P042429 | 7.920368671 | ne=GHR       | <a href="https://www.genecards.org/cgi-bin/carddisp.pl?gene=GHR">https://www.genecards.org/cgi-bin/carddisp.pl?gene=GHR</a>     |
| FGFR4       | Fibroblast Growth Factor Receptor 4               | Protein Coding | 59         | GC05P177086 | 7.900533676 | ne=FGFR4     | <a href="https://www.genecards.org/cgi-bin/carddisp.pl?gene=FGFR4">https://www.genecards.org/cgi-bin/carddisp.pl?gene=FGFR4</a> |
| LBR         | Lamin B Receptor                                  | Protein Coding | 54         | GC01M225401 | 7.891428947 | ne=LBR       | <a href="https://www.genecards.org/cgi-bin/carddisp.pl?gene=LBR">https://www.genecards.org/cgi-bin/carddisp.pl?gene=LBR</a>     |
| TDO2        | Tryptophan 2,3-Dioxygenase                        | Protein Coding | 53         | GC04P155854 | 7.886833191 | ne=TDO2      | <a href="https://www.genecards.org/cgi-bin/carddisp.pl?gene=TDO2">https://www.genecards.org/cgi-bin/carddisp.pl?gene=TDO2</a>   |
| NOS2        | Nitric Oxide Synthase 2                           | Protein Coding | 56         | GC17M027756 | 7.879232407 | ne=NOS2      | <a href="https://www.genecards.org/cgi-bin/carddisp.pl?gene=NOS2">https://www.genecards.org/cgi-bin/carddisp.pl?gene=NOS2</a>   |
| DBH         | Dopamine Beta-Hydroxylase                         | Protein Coding | 59         | GC09P133636 | 7.875431061 | ne=DBH       | <a href="https://www.genecards.org/cgi-bin/carddisp.pl?gene=DBH">https://www.genecards.org/cgi-bin/carddisp.pl?gene=DBH</a>     |
| GUSB        | Glucuronidase Beta                                | Protein Coding | 54         | GC07M065960 | 7.864967823 | ne=GUSB      | <a href="https://www.genecards.org/cgi-bin/carddisp.pl?gene=GUSB">https://www.genecards.org/cgi-bin/carddisp.pl?gene=GUSB</a>   |
| GRIA4       | Glutamate Ionotropic Receptor AMPA Type Subunit 4 | Protein Coding | 56         | GC11P105609 | 7.864396095 | ne=GRIA4     | <a href="https://www.genecards.org/cgi-bin/carddisp.pl?gene=GRIA4">https://www.genecards.org/cgi-bin/carddisp.pl?gene=GRIA4</a> |
| PKLR        | Pyruvate Kinase L/R                               | Protein Coding | 53         | GC01M155289 | 7.860248566 | ne=PKLR      | <a href="https://www.genecards.org/cgi-bin/carddisp.pl?gene=PKLR">https://www.genecards.org/cgi-bin/carddisp.pl?gene=PKLR</a>   |
| TKT         | Transketolase                                     | Protein Coding | 52         | GC03M053224 | 7.831721306 | ne=TKT       | <a href="https://www.genecards.org/cgi-bin/carddisp.pl?gene=TKT">https://www.genecards.org/cgi-bin/carddisp.pl?gene=TKT</a>     |
| TSPO        | Translocator Protein                              | Protein Coding | 51         | GC22P043151 | 7.831576824 | ne=TSPO      | <a href="https://www.genecards.org/cgi-bin/carddisp.pl?gene=TSPO">https://www.genecards.org/cgi-bin/carddisp.pl?gene=TSPO</a>   |
| ELANE       | Elastase, Neutrophil Expressed                    | Protein Coding | 58         | GC19P003656 | 7.827675819 | ne=ELANE     | <a href="https://www.genecards.org/cgi-bin/carddisp.pl?gene=ELANE">https://www.genecards.org/cgi-bin/carddisp.pl?gene=ELANE</a> |

|        |                                                  |                |    |             |             |                                                                                                                                   |
|--------|--------------------------------------------------|----------------|----|-------------|-------------|-----------------------------------------------------------------------------------------------------------------------------------|
| ACSM3  | Acyl-CoA Synthetase Medium Chain Family Member 3 | Protein Coding | 46 | GC16P020610 | 7.801516533 | <a href="https://www.genecards.org/cgi-bin/carddisp.pl?gene=ELANE">https://www.genecards.org/cgi-bin/carddisp.pl?gene=ELANE</a>   |
| FTH1   | Ferritin Heavy Chain 1                           | Protein Coding | 57 | GC11M061959 | 7.793233395 | <a href="https://www.genecards.org/cgi-bin/carddisp.pl?gene=ACSM3">https://www.genecards.org/cgi-bin/carddisp.pl?gene=ACSM3</a>   |
| SNCA   | Synuclein Alpha                                  | Protein Coding | 59 | GC04M089724 | 7.786792278 | <a href="https://www.genecards.org/cgi-bin/carddisp.pl?gene=FTH1">https://www.genecards.org/cgi-bin/carddisp.pl?gene=FTH1</a>     |
| ATM    | ATM Serine/Threonine Kinase                      | Protein Coding | 60 | GC11P108222 | 7.77983284  | <a href="https://www.genecards.org/cgi-bin/carddisp.pl?gene=SNCA">https://www.genecards.org/cgi-bin/carddisp.pl?gene=SNCA</a>     |
| APOA4  | Apolipoprotein A4                                | Protein Coding | 48 | GC11M116820 | 7.776916027 | <a href="https://www.genecards.org/cgi-bin/carddisp.pl?gene=ATM">https://www.genecards.org/cgi-bin/carddisp.pl?gene=ATM</a>       |
| PIK3R1 | Phosphoinositide-3-Kinase Regulatory Subunit 1   | Protein Coding | 57 | GC05P068215 | 7.765260696 | <a href="https://www.genecards.org/cgi-bin/carddisp.pl?gene=APOA4">https://www.genecards.org/cgi-bin/carddisp.pl?gene=APOA4</a>   |
| DNMT1  | DNA Methyltransferase 1                          | Protein Coding | 59 | GC19M010133 | 7.755319595 | <a href="https://www.genecards.org/cgi-bin/carddisp.pl?gene=PIK3R1">https://www.genecards.org/cgi-bin/carddisp.pl?gene=PIK3R1</a> |
| SUCLA2 | Succinate-CoA Ligase ADP-Forming Subunit Beta    | Protein Coding | 53 | GC13M047745 | 7.749754429 | <a href="https://www.genecards.org/cgi-bin/carddisp.pl?gene=DNMT1">https://www.genecards.org/cgi-bin/carddisp.pl?gene=DNMT1</a>   |
| ICAM1  | Intercellular Adhesion Molecule 1                | Protein Coding | 57 | GC19P010749 | 7.744787693 | <a href="https://www.genecards.org/cgi-bin/carddisp.pl?gene=SUCLA2">https://www.genecards.org/cgi-bin/carddisp.pl?gene=SUCLA2</a> |
| MEN1   | Menin 1                                          | Protein Coding | 51 | GC11M064803 | 7.738993168 | <a href="https://www.genecards.org/cgi-bin/carddisp.pl?gene=ICAM1">https://www.genecards.org/cgi-bin/carddisp.pl?gene=ICAM1</a>   |
| FTL    | Ferritin Light Chain                             | Protein Coding | 52 | GC19P048965 | 7.7378335   | <a href="https://www.genecards.org/cgi-bin/carddisp.pl?gene=MEN1">https://www.genecards.org/cgi-bin/carddisp.pl?gene=MEN1</a>     |
| OXA1L  | OXA1L Mitochondrial Inner Membrane Protein       | Protein Coding | 45 | GC14P022766 | 7.737726212 | <a href="https://www.genecards.org/cgi-bin/carddisp.pl?gene=FTL">https://www.genecards.org/cgi-bin/carddisp.pl?gene=FTL</a>       |
| TPH1   | Tryptophan Hydroxylase 1                         | Protein Coding | 52 | GC11M018040 | 7.725982666 | <a href="https://www.genecards.org/cgi-bin/carddisp.pl?gene=OXA1L">https://www.genecards.org/cgi-bin/carddisp.pl?gene=OXA1L</a>   |
| COX4I1 | Cytochrome C Oxidase Subunit 4I1                 | Protein Coding | 52 | GC16P085798 | 7.713577747 | <a href="https://www.genecards.org/cgi-bin/carddisp.pl?gene=TPH1">https://www.genecards.org/cgi-bin/carddisp.pl?gene=TPH1</a>     |
| SLC9A1 | Solute Carrier Family 9 Member A1                | Protein Coding | 57 | GC01M027239 | 7.711806297 | <a href="https://www.genecards.org/cgi-bin/carddisp.pl?gene=COX4I1">https://www.genecards.org/cgi-bin/carddisp.pl?gene=COX4I1</a> |

|         |                                                                        |                |    |             |             |                                                                                                                                     |
|---------|------------------------------------------------------------------------|----------------|----|-------------|-------------|-------------------------------------------------------------------------------------------------------------------------------------|
| GCH1    | GTP Cyclohydrolase 1                                                   | Protein Coding | 53 | GC14M054842 | 7.711480618 | <a href="https://www.genecards.org/cgi-bin/carddisp.pl?gene=SLC9A1">https://www.genecards.org/cgi-bin/carddisp.pl?gene=SLC9A1</a>   |
| AKR1C1  | Aldo-Keto Reductase Family 1 Member C1                                 | Protein Coding | 50 | GC10P004963 | 7.708277702 | <a href="https://www.genecards.org/cgi-bin/carddisp.pl?gene=GCH1">https://www.genecards.org/cgi-bin/carddisp.pl?gene=GCH1</a>       |
| F12     | Coagulation Factor XII                                                 | Protein Coding | 56 | GC05M177402 | 7.694033146 | <a href="https://www.genecards.org/cgi-bin/carddisp.pl?gene=AKR1C1">https://www.genecards.org/cgi-bin/carddisp.pl?gene=AKR1C1</a>   |
| ABHD5   | Abhydrolase Domain Containing 5, Lysophosphatidic Acid Acyltransferase | Protein Coding | 51 | GC03P043707 | 7.663006783 | <a href="https://www.genecards.org/cgi-bin/carddisp.pl?gene=F12">https://www.genecards.org/cgi-bin/carddisp.pl?gene=F12</a>         |
| AMN     | Amnion Associated Transmembrane Protein                                | Protein Coding | 47 | GC14P102922 | 7.659276962 | <a href="https://www.genecards.org/cgi-bin/carddisp.pl?gene=ABHD5">https://www.genecards.org/cgi-bin/carddisp.pl?gene=ABHD5</a>     |
| NR0B2   | Nuclear Receptor Subfamily 0 Group B Member 2                          | Protein Coding | 50 | GC01M027236 | 7.647449017 | <a href="https://www.genecards.org/cgi-bin/carddisp.pl?gene=AMN">https://www.genecards.org/cgi-bin/carddisp.pl?gene=AMN</a>         |
| CRAT    | Carnitine O-Acetyltransferase                                          | Protein Coding | 51 | GC09M129094 | 7.64017868  | <a href="https://www.genecards.org/cgi-bin/carddisp.pl?gene=NR0B2">https://www.genecards.org/cgi-bin/carddisp.pl?gene=NR0B2</a>     |
| ALDH1B1 | Aldehyde Dehydrogenase 1 Family Member B1                              | Protein Coding | 50 | GC09P038392 | 7.639844418 | <a href="https://www.genecards.org/cgi-bin/carddisp.pl?gene=CRAT">https://www.genecards.org/cgi-bin/carddisp.pl?gene=CRAT</a>       |
| AFP     | Alpha Fetoprotein                                                      | Protein Coding | 53 | GC04P073431 | 7.626152992 | <a href="https://www.genecards.org/cgi-bin/carddisp.pl?gene=ALDH1B1">https://www.genecards.org/cgi-bin/carddisp.pl?gene=ALDH1B1</a> |
| UGT1A5  | UDP Glucuronosyltransferase Family 1 Member A5                         | Protein Coding | 40 | GC02P233712 | 7.624723434 | <a href="https://www.genecards.org/cgi-bin/carddisp.pl?gene=AFP">https://www.genecards.org/cgi-bin/carddisp.pl?gene=AFP</a>         |
| CTNNB1  | Catenin Beta 1                                                         | Protein Coding | 60 | GC03P041194 | 7.623961449 | <a href="https://www.genecards.org/cgi-bin/carddisp.pl?gene=UGT1A5">https://www.genecards.org/cgi-bin/carddisp.pl?gene=UGT1A5</a>   |
| SLC5A8  | Solute Carrier Family 5 Member 8                                       | Protein Coding | 49 | GC12M101155 | 7.623325348 | <a href="https://www.genecards.org/cgi-bin/carddisp.pl?gene=CTNNB1">https://www.genecards.org/cgi-bin/carddisp.pl?gene=CTNNB1</a>   |
| AKR1C4  | Aldo-Keto Reductase Family 1 Member C4                                 | Protein Coding | 53 | GC10P005195 | 7.621516705 | <a href="https://www.genecards.org/cgi-bin/carddisp.pl?gene=SLC5A8">https://www.genecards.org/cgi-bin/carddisp.pl?gene=SLC5A8</a>   |
| ACP5    | Acid Phosphatase 5, Tartrate Resistant                                 | Protein Coding | 53 | GC19M011574 | 7.61563921  | <a href="https://www.genecards.org/cgi-bin/carddisp.pl?gene=AKR1C4">https://www.genecards.org/cgi-bin/carddisp.pl?gene=AKR1C4</a>   |
| CCND1   | Cyclin D1                                                              | Protein Coding | 60 | GC11P069641 | 7.614154339 | <a href="https://www.genecards.org/cgi-bin/carddisp.pl?gene=ACP5">https://www.genecards.org/cgi-bin/carddisp.pl?gene=ACP5</a>       |



|           |                                                    |                |    |             |             |  |                                                                                                                                         |
|-----------|----------------------------------------------------|----------------|----|-------------|-------------|--|-----------------------------------------------------------------------------------------------------------------------------------------|
|           |                                                    |                |    |             |             |  | ne=CCND1                                                                                                                                |
| KYAT1     | Kynurenine Aminotransferase 1                      | Protein Coding | 47 | GC09M128833 | 7.60359478  |  | <a href="https://www.genecards.org/cgi-bin/carddisp.pl?gene=KYAT1">https://www.genecards.org/cgi-bin/carddisp.pl?gene=KYAT1</a>         |
| NOS1      | Nitric Oxide Synthase 1                            | Protein Coding | 56 | GC12M117208 | 7.60078907  |  | <a href="https://www.genecards.org/cgi-bin/carddisp.pl?gene=NOS1">https://www.genecards.org/cgi-bin/carddisp.pl?gene=NOS1</a>           |
| SULT1A3   | Sulfotransferase Family 1A Member 3                | Protein Coding | 43 | GC16P030199 | 7.598351002 |  | <a href="https://www.genecards.org/cgi-bin/carddisp.pl?gene=SULT1A3">https://www.genecards.org/cgi-bin/carddisp.pl?gene=SULT1A3</a>     |
| CYCS      | Cytochrome C, Somatic                              | Protein Coding | 55 | GC07M025118 | 7.579985619 |  | <a href="https://www.genecards.org/cgi-bin/carddisp.pl?gene=CYCS">https://www.genecards.org/cgi-bin/carddisp.pl?gene=CYCS</a>           |
| ACLY      | ATP Citrate Lyase                                  | Protein Coding | 53 | GC17M041866 | 7.559963703 |  | <a href="https://www.genecards.org/cgi-bin/carddisp.pl?gene=ACLY">https://www.genecards.org/cgi-bin/carddisp.pl?gene=ACLY</a>           |
| CDKN3     | Cyclin Dependent Kinase Inhibitor 3                | Protein Coding | 48 | GC14P054398 | 7.558909893 |  | <a href="https://www.genecards.org/cgi-bin/carddisp.pl?gene=CDKN3">https://www.genecards.org/cgi-bin/carddisp.pl?gene=CDKN3</a>         |
| JAK2      | Janus Kinase 2                                     | Protein Coding | 60 | GC09P004985 | 7.554831028 |  | <a href="https://www.genecards.org/cgi-bin/carddisp.pl?gene=JAK2">https://www.genecards.org/cgi-bin/carddisp.pl?gene=JAK2</a>           |
| STAT3     | Signal Transducer And Activator Of Transcription 3 | Protein Coding | 61 | GC17M042313 | 7.553854942 |  | <a href="https://www.genecards.org/cgi-bin/carddisp.pl?gene=STAT3">https://www.genecards.org/cgi-bin/carddisp.pl?gene=STAT3</a>         |
| HCRT      | Hypocretin Neuropeptide Precursor                  | Protein Coding | 46 | GC17M051782 | 7.507509232 |  | <a href="https://www.genecards.org/cgi-bin/carddisp.pl?gene=HCRT">https://www.genecards.org/cgi-bin/carddisp.pl?gene=HCRT</a>           |
| SQSTM1    | Sequestosome 1                                     | Protein Coding | 55 | GC05P179806 | 7.495340824 |  | <a href="https://www.genecards.org/cgi-bin/carddisp.pl?gene=SQSTM1">https://www.genecards.org/cgi-bin/carddisp.pl?gene=SQSTM1</a>       |
| DBT       | Dihydroliipoamide Branched Chain Transacylase E2   | Protein Coding | 49 | GC01M100186 | 7.495174885 |  | <a href="https://www.genecards.org/cgi-bin/carddisp.pl?gene=DBT">https://www.genecards.org/cgi-bin/carddisp.pl?gene=DBT</a>             |
| TNFRSF11A | TNF Receptor Superfamily Member 11a                | Protein Coding | 54 | GC18P062325 | 7.492922783 |  | <a href="https://www.genecards.org/cgi-bin/carddisp.pl?gene=TNFRSF11A">https://www.genecards.org/cgi-bin/carddisp.pl?gene=TNFRSF11A</a> |
| PHYH      | Phytanoyl-CoA 2-Hydroxylase                        | Protein Coding | 52 | GC10M013277 | 7.48562479  |  | <a href="https://www.genecards.org/cgi-bin/carddisp.pl?gene=PHYH">https://www.genecards.org/cgi-bin/carddisp.pl?gene=PHYH</a>           |
| PYY       | Peptide YY                                         | Protein Coding | 49 | GC17M043952 | 7.484090805 |  | <a href="https://www.genecards.org/cgi-bin/carddisp.pl?gene=PYY">https://www.genecards.org/cgi-bin/carddisp.pl?gene=PYY</a>             |
| VLDLR     | Very Low Density Lipoprotein Receptor              | Protein Coding | 56 | GC09P002611 | 7.477643013 |  | <a href="https://www.genecards.org/cgi-bin/carddisp.pl?gene=VLDLR">https://www.genecards.org/cgi-bin/carddisp.pl?gene=VLDLR</a>         |

A

|         |                                                     |                |    |             |             |                                                                                                                                     |
|---------|-----------------------------------------------------|----------------|----|-------------|-------------|-------------------------------------------------------------------------------------------------------------------------------------|
| CSF2    | Colony Stimulating Factor 2                         | Protein Coding | 51 | GC05P132073 | 7.462800026 | <a href="https://www.genecards.org/cgi-bin/carddisp.pl?gene=VLDLR">https://www.genecards.org/cgi-bin/carddisp.pl?gene=VLDLR</a>     |
| FOXO1   | Forkhead Box O1                                     | Protein Coding | 56 | GC13M040555 | 7.41369772  | <a href="https://www.genecards.org/cgi-bin/carddisp.pl?gene=CSF2">https://www.genecards.org/cgi-bin/carddisp.pl?gene=CSF2</a>       |
| TTPA    | Alpha Tocopherol Transfer Protein                   | Protein Coding | 47 | GC08M063048 | 7.413542747 | <a href="https://www.genecards.org/cgi-bin/carddisp.pl?gene=FOXO1">https://www.genecards.org/cgi-bin/carddisp.pl?gene=FOXO1</a>     |
| LTC4S   | Leukotriene C4 Synthase                             | Protein Coding | 49 | GC05P179793 | 7.400671959 | <a href="https://www.genecards.org/cgi-bin/carddisp.pl?gene=TTPA">https://www.genecards.org/cgi-bin/carddisp.pl?gene=TTPA</a>       |
| GSTZ1   | Glutathione S-Transferase Zeta 1                    | Protein Coding | 48 | GC14P077320 | 7.394896507 | <a href="https://www.genecards.org/cgi-bin/carddisp.pl?gene=LTC4S">https://www.genecards.org/cgi-bin/carddisp.pl?gene=LTC4S</a>     |
| ACACB   | Acetyl-CoA Carboxylase Beta                         | Protein Coding | 52 | GC12P109116 | 7.383708    | <a href="https://www.genecards.org/cgi-bin/carddisp.pl?gene=GSTZ1">https://www.genecards.org/cgi-bin/carddisp.pl?gene=GSTZ1</a>     |
| CRYAA   | Crystallin Alpha A                                  | Protein Coding | 52 | GC21P043169 | 7.340756893 | <a href="https://www.genecards.org/cgi-bin/carddisp.pl?gene=ACACB">https://www.genecards.org/cgi-bin/carddisp.pl?gene=ACACB</a>     |
| SLC10A1 | Solute Carrier Family 10 Member 1                   | Protein Coding | 51 | GC14M069775 | 7.333871365 | <a href="https://www.genecards.org/cgi-bin/carddisp.pl?gene=CRYAA">https://www.genecards.org/cgi-bin/carddisp.pl?gene=CRYAA</a>     |
| OPLAH   | 5-Oxoprolinase, ATP-Hydrolysing                     | Protein Coding | 50 | GC08M144278 | 7.333218098 | <a href="https://www.genecards.org/cgi-bin/carddisp.pl?gene=SLC10A1">https://www.genecards.org/cgi-bin/carddisp.pl?gene=SLC10A1</a> |
| IGF2BP2 | Insulin Like Growth Factor 2 mRNA Binding Protein 2 | Protein Coding | 51 | GC03M185643 | 7.331263065 | <a href="https://www.genecards.org/cgi-bin/carddisp.pl?gene=OPLAH">https://www.genecards.org/cgi-bin/carddisp.pl?gene=OPLAH</a>     |
| CD320   | CD320 Molecule                                      | Protein Coding | 47 | GC19M008302 | 7.313445091 | <a href="https://www.genecards.org/cgi-bin/carddisp.pl?gene=IGF2BP2">https://www.genecards.org/cgi-bin/carddisp.pl?gene=IGF2BP2</a> |
| PTPN11  | Protein Tyrosine Phosphatase Non-Receptor Type 11   | Protein Coding | 61 | GC12P112418 | 7.310684204 | <a href="https://www.genecards.org/cgi-bin/carddisp.pl?gene=CD320">https://www.genecards.org/cgi-bin/carddisp.pl?gene=CD320</a>     |
| HLA-B   | Major Histocompatibility Complex, Class I, B        | Protein Coding | 52 | GC06M071682 | 7.308247089 | <a href="https://www.genecards.org/cgi-bin/carddisp.pl?gene=PTPN11">https://www.genecards.org/cgi-bin/carddisp.pl?gene=PTPN11</a>   |
| CCK     | Cholecystokinin                                     | Protein Coding | 48 | GC03M042274 | 7.304950714 | <a href="https://www.genecards.org/cgi-bin/carddisp.pl?gene=HLA-B">https://www.genecards.org/cgi-bin/carddisp.pl?gene=HLA-B</a>     |
| TBXAS1  | Thromboxane A Synthase 1                            | Protein Coding | 56 | GC07P139777 | 7.303420544 | <a href="https://www.genecards.org/cgi-bin/carddisp.pl?gene=CCK">https://www.genecards.org/cgi-bin/carddisp.pl?gene=CCK</a>         |
|         |                                                     |                |    |             |             | <a href="https://www.genecards.org/cgi-bin/carddisp.pl?gene=TBXAS1">https://www.genecards.org/cgi-bin/carddisp.pl?gene=TBXAS1</a>   |

|         |                                                            |                |    |             |             |                                                                                                                                     |
|---------|------------------------------------------------------------|----------------|----|-------------|-------------|-------------------------------------------------------------------------------------------------------------------------------------|
| ACY1    | Aminoacylase 1                                             | Protein Coding | 52 | GC03P051983 | 7.282396793 | <a href="https://www.genecards.org/cgi-bin/carddisp.pl?gene=TBXAS1">https://www.genecards.org/cgi-bin/carddisp.pl?gene=TBXAS1</a>   |
| CYP4V2  | Cytochrome P450 Family 4 Subfamily V Member 2              | Protein Coding | 48 | GC04P186191 | 7.213627338 | <a href="https://www.genecards.org/cgi-bin/carddisp.pl?gene=ACY1">https://www.genecards.org/cgi-bin/carddisp.pl?gene=ACY1</a>       |
| KCNJ5   | Potassium Inwardly Rectifying Channel Subfamily J Member 5 | Protein Coding | 53 | GC11P128891 | 7.193699837 | <a href="https://www.genecards.org/cgi-bin/carddisp.pl?gene=CYP4V2">https://www.genecards.org/cgi-bin/carddisp.pl?gene=CYP4V2</a>   |
| MIR29C  | MicroRNA 29c                                               | RNA Gene       | 21 | GC01M207811 | 7.183753967 | <a href="https://www.genecards.org/cgi-bin/carddisp.pl?gene=KCNJ5">https://www.genecards.org/cgi-bin/carddisp.pl?gene=KCNJ5</a>     |
| SLC2A3  | Solute Carrier Family 2 Member 3                           | Protein Coding | 55 | GC12M007919 | 7.150427818 | <a href="https://www.genecards.org/cgi-bin/carddisp.pl?gene=MIR29C">https://www.genecards.org/cgi-bin/carddisp.pl?gene=MIR29C</a>   |
| CBR1    | Carbonyl Reductase 1                                       | Protein Coding | 51 | GC21P036069 | 7.138096809 | <a href="https://www.genecards.org/cgi-bin/carddisp.pl?gene=SLC2A3">https://www.genecards.org/cgi-bin/carddisp.pl?gene=SLC2A3</a>   |
| IL2     | Interleukin 2                                              | Protein Coding | 53 | GC04M122451 | 7.137097359 | <a href="https://www.genecards.org/cgi-bin/carddisp.pl?gene=CBR1">https://www.genecards.org/cgi-bin/carddisp.pl?gene=CBR1</a>       |
| SLC6A3  | Solute Carrier Family 6 Member 3                           | Protein Coding | 57 | GC05M001392 | 7.135263443 | <a href="https://www.genecards.org/cgi-bin/carddisp.pl?gene=IL2">https://www.genecards.org/cgi-bin/carddisp.pl?gene=IL2</a>         |
| PLA2G1B | Phospholipase A2 Group IB                                  | Protein Coding | 51 | GC12M120322 | 7.106545925 | <a href="https://www.genecards.org/cgi-bin/carddisp.pl?gene=SLC6A3">https://www.genecards.org/cgi-bin/carddisp.pl?gene=SLC6A3</a>   |
| RORA    | RAR Related Orphan Receptor A                              | Protein Coding | 55 | GC15M060488 | 7.092875957 | <a href="https://www.genecards.org/cgi-bin/carddisp.pl?gene=PLA2G1B">https://www.genecards.org/cgi-bin/carddisp.pl?gene=PLA2G1B</a> |
| SULT2A1 | Sulfotransferase Family 2A Member 1                        | Protein Coding | 50 | GC19M047870 | 7.092458248 | <a href="https://www.genecards.org/cgi-bin/carddisp.pl?gene=RORA">https://www.genecards.org/cgi-bin/carddisp.pl?gene=RORA</a>       |
| IL13    | Interleukin 13                                             | Protein Coding | 50 | GC05P132656 | 7.088688374 | <a href="https://www.genecards.org/cgi-bin/carddisp.pl?gene=SULT2A1">https://www.genecards.org/cgi-bin/carddisp.pl?gene=SULT2A1</a> |
| PGK1    | Phosphoglycerate Kinase 1                                  | Protein Coding | 56 | GC0XP078032 | 7.080644131 | <a href="https://www.genecards.org/cgi-bin/carddisp.pl?gene=IL13">https://www.genecards.org/cgi-bin/carddisp.pl?gene=IL13</a>       |
| CD4     | CD4 Molecule                                               | Protein Coding | 57 | GC12P006786 | 7.079792976 | <a href="https://www.genecards.org/cgi-bin/carddisp.pl?gene=PGK1">https://www.genecards.org/cgi-bin/carddisp.pl?gene=PGK1</a>       |
| TYR     | Tyrosinase                                                 | Protein Coding | 55 | GC11P089177 | 7.075667381 | <a href="https://www.genecards.org/cgi-bin/carddisp.pl?gene=CD4">https://www.genecards.org/cgi-bin/carddisp.pl?gene=CD4</a>         |
|         |                                                            |                |    |             |             | <a href="https://www.genecards.org/cgi-bin/carddisp.pl?gene=TYR">https://www.genecards.org/cgi-bin/carddisp.pl?gene=TYR</a>         |

|         |                                                             |                |    |             |             |                                                                                                                                     |
|---------|-------------------------------------------------------------|----------------|----|-------------|-------------|-------------------------------------------------------------------------------------------------------------------------------------|
| FAAH    | Fatty Acid Amide Hydrolase                                  | Protein Coding | 54 | GC01P046394 | 7.074492455 | <a href="https://www.genecards.org/cgi-bin/carddisp.pl?gene=FAAH">https://www.genecards.org/cgi-bin/carddisp.pl?gene=FAAH</a>       |
| CCL5    | C-C Motif Chemokine Ligand 5                                | Protein Coding | 51 | GC17M035871 | 7.05864048  | <a href="https://www.genecards.org/cgi-bin/carddisp.pl?gene=CCL5">https://www.genecards.org/cgi-bin/carddisp.pl?gene=CCL5</a>       |
| HMBS    | Hydroxymethylbilane Synthase                                | Protein Coding | 51 | GC11P119084 | 7.051350594 | <a href="https://www.genecards.org/cgi-bin/carddisp.pl?gene=HMBS">https://www.genecards.org/cgi-bin/carddisp.pl?gene=HMBS</a>       |
| KCNJ10  | Potassium Inwardly Rectifying Channel Subfamily J Member 10 | Protein Coding | 52 | GC01M159998 | 7.050767422 | <a href="https://www.genecards.org/cgi-bin/carddisp.pl?gene=KCNJ10">https://www.genecards.org/cgi-bin/carddisp.pl?gene=KCNJ10</a>   |
| CACNA1S | Calcium Voltage-Gated Channel Subunit Alpha1 S              | Protein Coding | 55 | GC01M201008 | 7.044938564 | <a href="https://www.genecards.org/cgi-bin/carddisp.pl?gene=CACNA1S">https://www.genecards.org/cgi-bin/carddisp.pl?gene=CACNA1S</a> |
| EIF2AK3 | Eukaryotic Translation Initiation Factor 2 Alpha Kinase 3   | Protein Coding | 55 | GC02M088556 | 7.033459187 | <a href="https://www.genecards.org/cgi-bin/carddisp.pl?gene=EIF2AK3">https://www.genecards.org/cgi-bin/carddisp.pl?gene=EIF2AK3</a> |
| ACSL4   | Acyl-CoA Synthetase Long Chain Family Member 4              | Protein Coding | 52 | GC0XM109624 | 7.020869732 | <a href="https://www.genecards.org/cgi-bin/carddisp.pl?gene=ACSL4">https://www.genecards.org/cgi-bin/carddisp.pl?gene=ACSL4</a>     |
| PTS     | 6-Pyruvoyltetrahydropterin Synthase                         | Protein Coding | 51 | GC11P112226 | 6.987995625 | <a href="https://www.genecards.org/cgi-bin/carddisp.pl?gene=PTS">https://www.genecards.org/cgi-bin/carddisp.pl?gene=PTS</a>         |
| ACTB    | Actin Beta                                                  | Protein Coding | 56 | GC07M005527 | 6.978267193 | <a href="https://www.genecards.org/cgi-bin/carddisp.pl?gene=ACTB">https://www.genecards.org/cgi-bin/carddisp.pl?gene=ACTB</a>       |
| FBP2    | Fructose-Bisphosphatase 2                                   | Protein Coding | 50 | GC09M094558 | 6.97452116  | <a href="https://www.genecards.org/cgi-bin/carddisp.pl?gene=FBP2">https://www.genecards.org/cgi-bin/carddisp.pl?gene=FBP2</a>       |
| SULT1A2 | Sulfotransferase Family 1A Member 2                         | Protein Coding | 48 | GC16M028591 | 6.969522476 | <a href="https://www.genecards.org/cgi-bin/carddisp.pl?gene=SULT1A2">https://www.genecards.org/cgi-bin/carddisp.pl?gene=SULT1A2</a> |
| FXN     | Frataxin                                                    | Protein Coding | 52 | GC09P069035 | 6.963536739 | <a href="https://www.genecards.org/cgi-bin/carddisp.pl?gene=FXN">https://www.genecards.org/cgi-bin/carddisp.pl?gene=FXN</a>         |
| FGFR3   | Fibroblast Growth Factor Receptor 3                         | Protein Coding | 63 | GC04P001795 | 6.953905582 | <a href="https://www.genecards.org/cgi-bin/carddisp.pl?gene=FGFR3">https://www.genecards.org/cgi-bin/carddisp.pl?gene=FGFR3</a>     |
| ALAS2   | 5'-Aminolevulinate Synthase 2                               | Protein Coding | 51 | GC0XM055009 | 6.94052887  | <a href="https://www.genecards.org/cgi-bin/carddisp.pl?gene=ALAS2">https://www.genecards.org/cgi-bin/carddisp.pl?gene=ALAS2</a>     |
| SULT1E1 | Sulfotransferase Family 1E Member 1                         | Protein Coding | 50 | GC04M069823 | 6.935936451 | <a href="https://www.genecards.org/cgi-bin/carddisp.pl?gene=SULT1E1">https://www.genecards.org/cgi-bin/carddisp.pl?gene=SULT1E1</a> |

|          |                                                                        |                |    |             |             |                                                                                                                                       |
|----------|------------------------------------------------------------------------|----------------|----|-------------|-------------|---------------------------------------------------------------------------------------------------------------------------------------|
| GOT1     | Glutamic-Oxaloacetic Transaminase 1                                    | Protein Coding | 52 | GC10M099396 | 6.932769299 | <a href="https://www.genecards.org/cgi-bin/carddisp.pl?gene=SULT1E1">https://www.genecards.org/cgi-bin/carddisp.pl?gene=SULT1E1</a>   |
| FTCD-AS1 | FTCD Antisense RNA 1                                                   | RNA Gene       | 18 | GC21P046151 | 6.917957783 | <a href="https://www.genecards.org/cgi-bin/carddisp.pl?gene=GOT1">https://www.genecards.org/cgi-bin/carddisp.pl?gene=GOT1</a>         |
| PARP1    | Poly(ADP-Ribose) Polymerase 1                                          | Protein Coding | 58 | GC01M226360 | 6.91354847  | <a href="https://www.genecards.org/cgi-bin/carddisp.pl?gene=FTCD-AS1">https://www.genecards.org/cgi-bin/carddisp.pl?gene=FTCD-AS1</a> |
| TARDBP   | TAR DNA Binding Protein                                                | Protein Coding | 53 | GC01P011013 | 6.906384468 | <a href="https://www.genecards.org/cgi-bin/carddisp.pl?gene=PARP1">https://www.genecards.org/cgi-bin/carddisp.pl?gene=PARP1</a>       |
| IL1A     | Interleukin 1 Alpha                                                    | Protein Coding | 52 | GC02M112773 | 6.887263298 | <a href="https://www.genecards.org/cgi-bin/carddisp.pl?gene=TARDBP">https://www.genecards.org/cgi-bin/carddisp.pl?gene=TARDBP</a>     |
| HPGD     | 15-Hydroxyprostaglandin Dehydrogenase                                  | Protein Coding | 53 | GC04M174490 | 6.878279209 | <a href="https://www.genecards.org/cgi-bin/carddisp.pl?gene=IL1A">https://www.genecards.org/cgi-bin/carddisp.pl?gene=IL1A</a>         |
| CCR6     | C-C Motif Chemokine Receptor 6                                         | Protein Coding | 51 | GC06P167111 | 6.876591682 | <a href="https://www.genecards.org/cgi-bin/carddisp.pl?gene=HPGD">https://www.genecards.org/cgi-bin/carddisp.pl?gene=HPGD</a>         |
| CSN1S1   | Casein Alpha S1                                                        | Protein Coding | 43 | GC04P069932 | 6.874129295 | <a href="https://www.genecards.org/cgi-bin/carddisp.pl?gene=CCR6">https://www.genecards.org/cgi-bin/carddisp.pl?gene=CCR6</a>         |
| APOC1    | Apolipoprotein C1                                                      | Protein Coding | 46 | GC19P044914 | 6.873025417 | <a href="https://www.genecards.org/cgi-bin/carddisp.pl?gene=CSN1S1">https://www.genecards.org/cgi-bin/carddisp.pl?gene=CSN1S1</a>     |
| IDO1     | Indoleamine 2,3-Dioxygenase 1                                          | Protein Coding | 53 | GC08P039891 | 6.860894203 | <a href="https://www.genecards.org/cgi-bin/carddisp.pl?gene=APOC1">https://www.genecards.org/cgi-bin/carddisp.pl?gene=APOC1</a>       |
| FOS      | Fos Proto-Oncogene, AP-1 Transcription Factor Subunit                  | Protein Coding | 57 | GC14P075278 | 6.856826782 | <a href="https://www.genecards.org/cgi-bin/carddisp.pl?gene=IDO1">https://www.genecards.org/cgi-bin/carddisp.pl?gene=IDO1</a>         |
| PIK3CG   | Phosphatidylinositol-4,5-Bisphosphate 3-Kinase Catalytic Subunit Gamma | Protein Coding | 55 | GC07P106865 | 6.855944633 | <a href="https://www.genecards.org/cgi-bin/carddisp.pl?gene=FOS">https://www.genecards.org/cgi-bin/carddisp.pl?gene=FOS</a>           |
| ADORA2A  | Adenosine A2a Receptor                                                 | Protein Coding | 53 | GC22P024417 | 6.848574162 | <a href="https://www.genecards.org/cgi-bin/carddisp.pl?gene=PIK3CG">https://www.genecards.org/cgi-bin/carddisp.pl?gene=PIK3CG</a>     |
| MAPK14   | Mitogen-Activated Protein Kinase 14                                    | Protein Coding | 58 | GC06P092286 | 6.802408218 | <a href="https://www.genecards.org/cgi-bin/carddisp.pl?gene=ADORA2A">https://www.genecards.org/cgi-bin/carddisp.pl?gene=ADORA2A</a>   |
| GUCY2C   | Guanylate Cyclase 2C                                                   | Protein Coding | 52 | GC12M014612 | 6.80224371  | <a href="https://www.genecards.org/cgi-bin/carddisp.pl?gene=MAPK14">https://www.genecards.org/cgi-bin/carddisp.pl?gene=MAPK14</a>     |
|          |                                                                        |                |    |             |             | <a href="https://www.genecards.org/cgi-bin/carddisp.pl?gene=GUCY2C">https://www.genecards.org/cgi-bin/carddisp.pl?gene=GUCY2C</a>     |

|        |                                               |                |    |             |             |                                                                                                                                   |
|--------|-----------------------------------------------|----------------|----|-------------|-------------|-----------------------------------------------------------------------------------------------------------------------------------|
| MAPK10 | Mitogen-Activated Protein Kinase 10           | Protein Coding | 56 | GC04M085990 | 6.799727917 | <a href="https://www.genecards.org/cgi-bin/carddisp.pl?gene=MAPK10">https://www.genecards.org/cgi-bin/carddisp.pl?gene=MAPK10</a> |
| AGT    | Angiotensinogen                               | Protein Coding | 56 | GC01M230690 | 6.794569969 | <a href="https://www.genecards.org/cgi-bin/carddisp.pl?gene=AGT">https://www.genecards.org/cgi-bin/carddisp.pl?gene=AGT</a>       |
| IL18   | Interleukin 18                                | Protein Coding | 50 | GC11M112143 | 6.792854786 | <a href="https://www.genecards.org/cgi-bin/carddisp.pl?gene=IL18">https://www.genecards.org/cgi-bin/carddisp.pl?gene=IL18</a>     |
| BPGM   | Bisphosphoglycerate Mutase                    | Protein Coding | 52 | GC07P134646 | 6.783220291 | <a href="https://www.genecards.org/cgi-bin/carddisp.pl?gene=BPGM">https://www.genecards.org/cgi-bin/carddisp.pl?gene=BPGM</a>     |
| SLPI   | Secretory Leukocyte Peptidase Inhibitor       | Protein Coding | 47 | GC20M045252 | 6.7794981   | <a href="https://www.genecards.org/cgi-bin/carddisp.pl?gene=SLPI">https://www.genecards.org/cgi-bin/carddisp.pl?gene=SLPI</a>     |
| LIAS   | Lipoic Acid Synthetase                        | Protein Coding | 48 | GC04P039499 | 6.778037071 | <a href="https://www.genecards.org/cgi-bin/carddisp.pl?gene=LIAS">https://www.genecards.org/cgi-bin/carddisp.pl?gene=LIAS</a>     |
| AMT    | Aminomethyltransferase                        | Protein Coding | 51 | GC03M051568 | 6.773910046 | <a href="https://www.genecards.org/cgi-bin/carddisp.pl?gene=AMT">https://www.genecards.org/cgi-bin/carddisp.pl?gene=AMT</a>       |
| GPI    | Glucose-6-Phosphate Isomerase                 | Protein Coding | 55 | GC19P034359 | 6.765838146 | <a href="https://www.genecards.org/cgi-bin/carddisp.pl?gene=GPI">https://www.genecards.org/cgi-bin/carddisp.pl?gene=GPI</a>       |
| MAPK8  | Mitogen-Activated Protein Kinase 8            | Protein Coding | 57 | GC10P048306 | 6.759390831 | <a href="https://www.genecards.org/cgi-bin/carddisp.pl?gene=MAPK8">https://www.genecards.org/cgi-bin/carddisp.pl?gene=MAPK8</a>   |
| BRAF   | B-Raf Proto-Oncogene, Serine/Threonine Kinase | Protein Coding | 60 | GC07M140742 | 6.748792171 | <a href="https://www.genecards.org/cgi-bin/carddisp.pl?gene=BRAF">https://www.genecards.org/cgi-bin/carddisp.pl?gene=BRAF</a>     |
| YARS2  | Tyrosyl-TRNA Synthetase 2                     | Protein Coding | 51 | GC12M032819 | 6.745001793 | <a href="https://www.genecards.org/cgi-bin/carddisp.pl?gene=YARS2">https://www.genecards.org/cgi-bin/carddisp.pl?gene=YARS2</a>   |
| RNASE3 | Ribonuclease A Family Member 3                | Protein Coding | 46 | GC14P020891 | 6.725999355 | <a href="https://www.genecards.org/cgi-bin/carddisp.pl?gene=RNASE3">https://www.genecards.org/cgi-bin/carddisp.pl?gene=RNASE3</a> |
| GSK3B  | Glycogen Synthase Kinase 3 Beta               | Protein Coding | 57 | GC03M119821 | 6.701512337 | <a href="https://www.genecards.org/cgi-bin/carddisp.pl?gene=GSK3B">https://www.genecards.org/cgi-bin/carddisp.pl?gene=GSK3B</a>   |
| BMP2   | Bone Morphogenetic Protein 2                  | Protein Coding | 53 | GC20P006767 | 6.691226959 | <a href="https://www.genecards.org/cgi-bin/carddisp.pl?gene=BMP2">https://www.genecards.org/cgi-bin/carddisp.pl?gene=BMP2</a>     |
| MMP3   | Matrix Metallopeptidase 3                     | Protein Coding | 57 | GC11M102835 | 6.690543175 | <a href="https://www.genecards.org/cgi-bin/carddisp.pl?gene=MMP3">https://www.genecards.org/cgi-bin/carddisp.pl?gene=MMP3</a>     |

|         |                                                            |                |    |             |             |                                                                                                                                     |
|---------|------------------------------------------------------------|----------------|----|-------------|-------------|-------------------------------------------------------------------------------------------------------------------------------------|
| FABP1   | Fatty Acid Binding Protein 1                               | Protein Coding | 49 | GC02M088122 | 6.688127518 | <a href="https://www.genecards.org/cgi-bin/carddisp.pl?gene=FABP1">https://www.genecards.org/cgi-bin/carddisp.pl?gene=FABP1</a>     |
| ALDH3A1 | Aldehyde Dehydrogenase 3 Family Member A1                  | Protein Coding | 52 | GC17M019737 | 6.668470383 | <a href="https://www.genecards.org/cgi-bin/carddisp.pl?gene=ALDH3A1">https://www.genecards.org/cgi-bin/carddisp.pl?gene=ALDH3A1</a> |
| HSPG2   | Heparan Sulfate Proteoglycan 2                             | Protein Coding | 54 | GC01M021822 | 6.655029297 | <a href="https://www.genecards.org/cgi-bin/carddisp.pl?gene=HSPG2">https://www.genecards.org/cgi-bin/carddisp.pl?gene=HSPG2</a>     |
| MMP2    | Matrix Metalloproteinase 2                                 | Protein Coding | 60 | GC16P055390 | 6.633100986 | <a href="https://www.genecards.org/cgi-bin/carddisp.pl?gene=MMP2">https://www.genecards.org/cgi-bin/carddisp.pl?gene=MMP2</a>       |
| ERCC1   | ERCC Excision Repair 1, Endonuclease Non-Catalytic Subunit | Protein Coding | 52 | GC19M070729 | 6.630684376 | <a href="https://www.genecards.org/cgi-bin/carddisp.pl?gene=ERCC1">https://www.genecards.org/cgi-bin/carddisp.pl?gene=ERCC1</a>     |
| CD38    | CD38 Molecule                                              | Protein Coding | 53 | GC04P019223 | 6.6181674   | <a href="https://www.genecards.org/cgi-bin/carddisp.pl?gene=CD38">https://www.genecards.org/cgi-bin/carddisp.pl?gene=CD38</a>       |
| TIMP1   | TIMP Metalloproteinase Inhibitor 1                         | Protein Coding | 52 | GC0XP047711 | 6.613132477 | <a href="https://www.genecards.org/cgi-bin/carddisp.pl?gene=TIMP1">https://www.genecards.org/cgi-bin/carddisp.pl?gene=TIMP1</a>     |
| GMPS    | Guanine Monophosphate Synthase                             | Protein Coding | 51 | GC03P155870 | 6.612122536 | <a href="https://www.genecards.org/cgi-bin/carddisp.pl?gene=GMPS">https://www.genecards.org/cgi-bin/carddisp.pl?gene=GMPS</a>       |
| INPPL1  | Inositol Polyphosphate Phosphatase Like 1                  | Protein Coding | 55 | GC11P072223 | 6.6092906   | <a href="https://www.genecards.org/cgi-bin/carddisp.pl?gene=INPPL1">https://www.genecards.org/cgi-bin/carddisp.pl?gene=INPPL1</a>   |
| TSC2    | TSC Complex Subunit 2                                      | Protein Coding | 56 | GC16P013513 | 6.607493401 | <a href="https://www.genecards.org/cgi-bin/carddisp.pl?gene=TSC2">https://www.genecards.org/cgi-bin/carddisp.pl?gene=TSC2</a>       |
| STS     | Steroid Sulfatase                                          | Protein Coding | 52 | GC0XP007146 | 6.60575819  | <a href="https://www.genecards.org/cgi-bin/carddisp.pl?gene=STS">https://www.genecards.org/cgi-bin/carddisp.pl?gene=STS</a>         |
| PAX4    | Paired Box 4                                               | Protein Coding | 47 | GC07M127610 | 6.605308533 | <a href="https://www.genecards.org/cgi-bin/carddisp.pl?gene=PAX4">https://www.genecards.org/cgi-bin/carddisp.pl?gene=PAX4</a>       |
| ALDH1A2 | Aldehyde Dehydrogenase 1 Family Member A2                  | Protein Coding | 55 | GC15M121963 | 6.603302479 | <a href="https://www.genecards.org/cgi-bin/carddisp.pl?gene=ALDH1A2">https://www.genecards.org/cgi-bin/carddisp.pl?gene=ALDH1A2</a> |
| PTH1LH  | Parathyroid Hormone Like Hormone                           | Protein Coding | 52 | GC12M027959 | 6.598110199 | <a href="https://www.genecards.org/cgi-bin/carddisp.pl?gene=PTH1LH">https://www.genecards.org/cgi-bin/carddisp.pl?gene=PTH1LH</a>   |
| BAAT    | Bile Acid-CoA:Amino Acid N-Acyltransferase                 | Protein Coding | 50 | GC09M101354 | 6.590001106 | <a href="https://www.genecards.org/cgi-bin/carddisp.pl?gene=BAAT">https://www.genecards.org/cgi-bin/carddisp.pl?gene=BAAT</a>       |

|         |                                                    |                |    |             |             |                                                                                                                                     |
|---------|----------------------------------------------------|----------------|----|-------------|-------------|-------------------------------------------------------------------------------------------------------------------------------------|
| CHKA    | Choline Kinase Alpha                               | Protein Coding | 49 | GC11M068052 | 6.575095654 | <a href="https://www.genecards.org/cgi-bin/carddisp.pl?gene=BAAT">https://www.genecards.org/cgi-bin/carddisp.pl?gene=BAAT</a>       |
| ELN     | Elastin                                            | Protein Coding | 50 | GC07P074027 | 6.564837456 | <a href="https://www.genecards.org/cgi-bin/carddisp.pl?gene=CHKA">https://www.genecards.org/cgi-bin/carddisp.pl?gene=CHKA</a>       |
| WDR72   | WD Repeat Domain 72                                | Protein Coding | 43 | GC15M125660 | 6.55697155  | <a href="https://www.genecards.org/cgi-bin/carddisp.pl?gene=ELN">https://www.genecards.org/cgi-bin/carddisp.pl?gene=ELN</a>         |
| HTT     | Huntingtin                                         | Protein Coding | 51 | GC04P003041 | 6.549586296 | <a href="https://www.genecards.org/cgi-bin/carddisp.pl?gene=WDR72">https://www.genecards.org/cgi-bin/carddisp.pl?gene=WDR72</a>     |
| STAT1   | Signal Transducer And Activator Of Transcription 1 | Protein Coding | 60 | GC02M190908 | 6.545604706 | <a href="https://www.genecards.org/cgi-bin/carddisp.pl?gene=HTT">https://www.genecards.org/cgi-bin/carddisp.pl?gene=HTT</a>         |
| ALOX15  | Arachidonate 15-Lipoxygenase                       | Protein Coding | 52 | GC17M004630 | 6.537812233 | <a href="https://www.genecards.org/cgi-bin/carddisp.pl?gene=STAT1">https://www.genecards.org/cgi-bin/carddisp.pl?gene=STAT1</a>     |
| FFAR4   | Free Fatty Acid Receptor 4                         | Protein Coding | 47 | GC10P093566 | 6.531475067 | <a href="https://www.genecards.org/cgi-bin/carddisp.pl?gene=ALOX15">https://www.genecards.org/cgi-bin/carddisp.pl?gene=ALOX15</a>   |
| CSF1    | Colony Stimulating Factor 1                        | Protein Coding | 51 | GC01P109911 | 6.528945923 | <a href="https://www.genecards.org/cgi-bin/carddisp.pl?gene=FFAR4">https://www.genecards.org/cgi-bin/carddisp.pl?gene=FFAR4</a>     |
| PRKN    | Parkin RBR E3 Ubiquitin Protein Ligase             | Protein Coding | 53 | GC06M161348 | 6.517373085 | <a href="https://www.genecards.org/cgi-bin/carddisp.pl?gene=CSF1">https://www.genecards.org/cgi-bin/carddisp.pl?gene=CSF1</a>       |
| SOAT2   | Sterol O-Acyltransferase 2                         | Protein Coding | 50 | GC12P053103 | 6.513618469 | <a href="https://www.genecards.org/cgi-bin/carddisp.pl?gene=PRKN">https://www.genecards.org/cgi-bin/carddisp.pl?gene=PRKN</a>       |
| NTS     | Neurotensin                                        | Protein Coding | 48 | GC12P085876 | 6.508972645 | <a href="https://www.genecards.org/cgi-bin/carddisp.pl?gene=SOAT2">https://www.genecards.org/cgi-bin/carddisp.pl?gene=SOAT2</a>     |
| HSD17B1 | Hydroxysteroid 17-Beta Dehydrogenase 1             | Protein Coding | 48 | GC17P061989 | 6.502941608 | <a href="https://www.genecards.org/cgi-bin/carddisp.pl?gene=NTS">https://www.genecards.org/cgi-bin/carddisp.pl?gene=NTS</a>         |
| KNG1    | Kininogen 1                                        | Protein Coding | 55 | GC03P186717 | 6.496859074 | <a href="https://www.genecards.org/cgi-bin/carddisp.pl?gene=HSD17B1">https://www.genecards.org/cgi-bin/carddisp.pl?gene=HSD17B1</a> |
| HBA1    | Hemoglobin Subunit Alpha 1                         | Protein Coding | 49 | GC16P013428 | 6.478796959 | <a href="https://www.genecards.org/cgi-bin/carddisp.pl?gene=KNG1">https://www.genecards.org/cgi-bin/carddisp.pl?gene=KNG1</a>       |
| ESR2    | Estrogen Receptor 2                                | Protein Coding | 56 | GC14M064084 | 6.464812279 | <a href="https://www.genecards.org/cgi-bin/carddisp.pl?gene=HBA1">https://www.genecards.org/cgi-bin/carddisp.pl?gene=HBA1</a>       |
|         |                                                    |                |    |             |             | <a href="https://www.genecards.org/cgi-bin/carddisp.pl?gene=ESR2">https://www.genecards.org/cgi-bin/carddisp.pl?gene=ESR2</a>       |



|         |                                                     |                |    |             |             |                                                                                                                                     |
|---------|-----------------------------------------------------|----------------|----|-------------|-------------|-------------------------------------------------------------------------------------------------------------------------------------|
| ERBB2   | Erb-B2 Receptor Tyrosine Kinase 2                   | Protein Coding | 62 | GC17P039687 | 6.462425709 | <a href="https://www.genecards.org/cgi-bin/carddisp.pl?gene=ERBB2">https://www.genecards.org/cgi-bin/carddisp.pl?gene=ERBB2</a>     |
| HP      | Haptoglobin                                         | Protein Coding | 52 | GC16P072372 | 6.458934307 | <a href="https://www.genecards.org/cgi-bin/carddisp.pl?gene=HP">https://www.genecards.org/cgi-bin/carddisp.pl?gene=HP</a>           |
| PTGIS   | Prostaglandin I2 Synthase                           | Protein Coding | 52 | GC20M049503 | 6.456087112 | <a href="https://www.genecards.org/cgi-bin/carddisp.pl?gene=PTGIS">https://www.genecards.org/cgi-bin/carddisp.pl?gene=PTGIS</a>     |
| ATF4    | Activating Transcription Factor 4                   | Protein Coding | 52 | GC22P039519 | 6.442789555 | <a href="https://www.genecards.org/cgi-bin/carddisp.pl?gene=ATF4">https://www.genecards.org/cgi-bin/carddisp.pl?gene=ATF4</a>       |
| THBD    | Thrombomodulin                                      | Protein Coding | 53 | GC20M023026 | 6.435276985 | <a href="https://www.genecards.org/cgi-bin/carddisp.pl?gene=THBD">https://www.genecards.org/cgi-bin/carddisp.pl?gene=THBD</a>       |
| DIO2    | Iodothyronine Deiodinase 2                          | Protein Coding | 46 | GC14M080197 | 6.413453579 | <a href="https://www.genecards.org/cgi-bin/carddisp.pl?gene=DIO2">https://www.genecards.org/cgi-bin/carddisp.pl?gene=DIO2</a>       |
| PDK1    | Pyruvate Dehydrogenase Kinase 1                     | Protein Coding | 53 | GC02P172555 | 6.402394295 | <a href="https://www.genecards.org/cgi-bin/carddisp.pl?gene=PDK1">https://www.genecards.org/cgi-bin/carddisp.pl?gene=PDK1</a>       |
| IFNB1   | Interferon Beta 1                                   | Protein Coding | 50 | GC09M021077 | 6.401349068 | <a href="https://www.genecards.org/cgi-bin/carddisp.pl?gene=IFNB1">https://www.genecards.org/cgi-bin/carddisp.pl?gene=IFNB1</a>     |
| LRP1    | LDL Receptor Related Protein 1                      | Protein Coding | 53 | GC12P057128 | 6.399954319 | <a href="https://www.genecards.org/cgi-bin/carddisp.pl?gene=LRP1">https://www.genecards.org/cgi-bin/carddisp.pl?gene=LRP1</a>       |
| VCP     | Valosin Containing Protein                          | Protein Coding | 57 | GC09M035056 | 6.39056921  | <a href="https://www.genecards.org/cgi-bin/carddisp.pl?gene=VCP">https://www.genecards.org/cgi-bin/carddisp.pl?gene=VCP</a>         |
| MOGS    | Mannosyl-Oligosaccharide Glucosidase                | Protein Coding | 50 | GC02M074461 | 6.386434078 | <a href="https://www.genecards.org/cgi-bin/carddisp.pl?gene=MOGS">https://www.genecards.org/cgi-bin/carddisp.pl?gene=MOGS</a>       |
| MIR3944 | MicroRNA 3944                                       | RNA Gene       | 15 | GC10M133371 | 6.384291649 | <a href="https://www.genecards.org/cgi-bin/carddisp.pl?gene=MIR3944">https://www.genecards.org/cgi-bin/carddisp.pl?gene=MIR3944</a> |
| GPAM    | Glycerol-3-Phosphate Acyltransferase, Mitochondrial | Protein Coding | 50 | GC10M112148 | 6.383892059 | <a href="https://www.genecards.org/cgi-bin/carddisp.pl?gene=GPAM">https://www.genecards.org/cgi-bin/carddisp.pl?gene=GPAM</a>       |
| PPT1    | Palmitoyl-Protein Thioesterase 1                    | Protein Coding | 53 | GC01M040103 | 6.374232292 | <a href="https://www.genecards.org/cgi-bin/carddisp.pl?gene=PPT1">https://www.genecards.org/cgi-bin/carddisp.pl?gene=PPT1</a>       |
| CTSD    | Cathepsin D                                         | Protein Coding | 59 | GC11M001752 | 6.372982979 | <a href="https://www.genecards.org/cgi-bin/carddisp.pl?gene=CTSD">https://www.genecards.org/cgi-bin/carddisp.pl?gene=CTSD</a>       |

|         |                                                    |                |    |             |             |                                                                                                                                     |
|---------|----------------------------------------------------|----------------|----|-------------|-------------|-------------------------------------------------------------------------------------------------------------------------------------|
| HRAS    | HRas Proto-Oncogene, GTPase                        | Protein Coding | 59 | GC11M004421 | 6.359884739 | <a href="https://www.genecards.org/cgi-bin/carddisp.pl?gene=CTSD">https://www.genecards.org/cgi-bin/carddisp.pl?gene=CTSD</a>       |
| PLAT    | Plasminogen Activator, Tissue Type                 | Protein Coding | 57 | GC08M042174 | 6.354998589 | <a href="https://www.genecards.org/cgi-bin/carddisp.pl?gene=HRAS">https://www.genecards.org/cgi-bin/carddisp.pl?gene=HRAS</a>       |
| GRIA3   | Glutamate Ionotropic Receptor AMPA Type Subunit 3  | Protein Coding | 58 | GC0XP123184 | 6.331629753 | <a href="https://www.genecards.org/cgi-bin/carddisp.pl?gene=PLAT">https://www.genecards.org/cgi-bin/carddisp.pl?gene=PLAT</a>       |
| AVP     | Arginine Vasopressin                               | Protein Coding | 51 | GC20M003082 | 6.322710514 | <a href="https://www.genecards.org/cgi-bin/carddisp.pl?gene=GRIA3">https://www.genecards.org/cgi-bin/carddisp.pl?gene=GRIA3</a>     |
| EGFR    | Epidermal Growth Factor Receptor                   | Protein Coding | 62 | GC07P055019 | 6.309800625 | <a href="https://www.genecards.org/cgi-bin/carddisp.pl?gene=AVP">https://www.genecards.org/cgi-bin/carddisp.pl?gene=AVP</a>         |
| PLG     | Plasminogen                                        | Protein Coding | 56 | GC06P160702 | 6.293350697 | <a href="https://www.genecards.org/cgi-bin/carddisp.pl?gene=EGFR">https://www.genecards.org/cgi-bin/carddisp.pl?gene=EGFR</a>       |
| ACHE    | Acetylcholinesterase (Cartwright Blood Group)      | Protein Coding | 53 | GC07M100889 | 6.264330864 | <a href="https://www.genecards.org/cgi-bin/carddisp.pl?gene=PLG">https://www.genecards.org/cgi-bin/carddisp.pl?gene=PLG</a>         |
| CASP3   | Caspase 3                                          | Protein Coding | 57 | GC04M184627 | 6.237726212 | <a href="https://www.genecards.org/cgi-bin/carddisp.pl?gene=ACHE">https://www.genecards.org/cgi-bin/carddisp.pl?gene=ACHE</a>       |
| ST3GAL4 | ST3 Beta-Galactoside Alpha-2,3-Sialyltransferase 4 | Protein Coding | 50 | GC11P126355 | 6.23571682  | <a href="https://www.genecards.org/cgi-bin/carddisp.pl?gene=CASP3">https://www.genecards.org/cgi-bin/carddisp.pl?gene=CASP3</a>     |
| SLC30A8 | Solute Carrier Family 30 Member 8                  | Protein Coding | 48 | GC08P116950 | 6.219080925 | <a href="https://www.genecards.org/cgi-bin/carddisp.pl?gene=ST3GAL4">https://www.genecards.org/cgi-bin/carddisp.pl?gene=ST3GAL4</a> |
| DLAT    | Dihydroliipoamide S-Acetyltransferase              | Protein Coding | 53 | GC11P112026 | 6.217043877 | <a href="https://www.genecards.org/cgi-bin/carddisp.pl?gene=SLC30A8">https://www.genecards.org/cgi-bin/carddisp.pl?gene=SLC30A8</a> |
| PDGFRB  | Platelet Derived Growth Factor Receptor Beta       | Protein Coding | 60 | GC05M150113 | 6.213683605 | <a href="https://www.genecards.org/cgi-bin/carddisp.pl?gene=DLAT">https://www.genecards.org/cgi-bin/carddisp.pl?gene=DLAT</a>       |
| GYG1    | Glycogenin 1                                       | Protein Coding | 53 | GC03P148991 | 6.206664085 | <a href="https://www.genecards.org/cgi-bin/carddisp.pl?gene=PDGFRB">https://www.genecards.org/cgi-bin/carddisp.pl?gene=PDGFRB</a>   |
| GPHN    | Gephyrin                                           | Protein Coding | 55 | GC14P066507 | 6.201871395 | <a href="https://www.genecards.org/cgi-bin/carddisp.pl?gene=GYG1">https://www.genecards.org/cgi-bin/carddisp.pl?gene=GYG1</a>       |
| ALDH3B1 | Aldehyde Dehydrogenase 3 Family Member B1          | Protein Coding | 47 | GC11P071077 | 6.159162521 | <a href="https://www.genecards.org/cgi-bin/carddisp.pl?gene=GPHN">https://www.genecards.org/cgi-bin/carddisp.pl?gene=GPHN</a>       |
|         |                                                    |                |    |             |             | <a href="https://www.genecards.org/cgi-bin/carddisp.pl?gene=ALDH3B1">https://www.genecards.org/cgi-bin/carddisp.pl?gene=ALDH3B1</a> |

|         |                                                                              |                |    |             |             |                                                                                                                                                 |
|---------|------------------------------------------------------------------------------|----------------|----|-------------|-------------|-------------------------------------------------------------------------------------------------------------------------------------------------|
| PIEZO2  | Piezo Type Mechanosensitive Ion Channel Component 2                          | Protein Coding | 43 | GC18M010670 | 6.156918049 | ne=ALDH3B1<br><a href="https://www.genecards.org/cgi-bin/carddisp.pl?gene=PIEZO2">https://www.genecards.org/cgi-bin/carddisp.pl?gene=PIEZO2</a> |
| HTR1A   | 5-Hydroxytryptamine Receptor 1A                                              | Protein Coding | 53 | GC05M063960 | 6.154148102 | <a href="https://www.genecards.org/cgi-bin/carddisp.pl?gene=HTR1A">https://www.genecards.org/cgi-bin/carddisp.pl?gene=HTR1A</a>                 |
| UGT2B17 | UDP Glucuronosyltransferase Family 2 Member B17                              | Protein Coding | 47 | GC04M068537 | 6.152544975 | <a href="https://www.genecards.org/cgi-bin/carddisp.pl?gene=UGT2B17">https://www.genecards.org/cgi-bin/carddisp.pl?gene=UGT2B17</a>             |
| RUNX2   | RUNX Family Transcription Factor 2                                           | Protein Coding | 53 | GC06P092371 | 6.151573658 | <a href="https://www.genecards.org/cgi-bin/carddisp.pl?gene=RUNX2">https://www.genecards.org/cgi-bin/carddisp.pl?gene=RUNX2</a>                 |
| ALOX5AP | Arachidonate 5-Lipoxygenase Activating Protein                               | Protein Coding | 51 | GC13P030713 | 6.141064167 | <a href="https://www.genecards.org/cgi-bin/carddisp.pl?gene=ALOX5AP">https://www.genecards.org/cgi-bin/carddisp.pl?gene=ALOX5AP</a>             |
| PHGDH   | Phosphoglycerate Dehydrogenase                                               | Protein Coding | 57 | GC01P119660 | 6.127547741 | <a href="https://www.genecards.org/cgi-bin/carddisp.pl?gene=PHGDH">https://www.genecards.org/cgi-bin/carddisp.pl?gene=PHGDH</a>                 |
| WWOX    | WW Domain Containing Oxidoreductase                                          | Protein Coding | 52 | GC16P078099 | 6.116097927 | <a href="https://www.genecards.org/cgi-bin/carddisp.pl?gene=WWOX">https://www.genecards.org/cgi-bin/carddisp.pl?gene=WWOX</a>                   |
| ALDH1A3 | Aldehyde Dehydrogenase 1 Family Member A3                                    | Protein Coding | 52 | GC15P100877 | 6.111147881 | <a href="https://www.genecards.org/cgi-bin/carddisp.pl?gene=ALDH1A3">https://www.genecards.org/cgi-bin/carddisp.pl?gene=ALDH1A3</a>             |
| PLCB1   | Phospholipase C Beta 1                                                       | Protein Coding | 53 | GC20P008061 | 6.108633518 | <a href="https://www.genecards.org/cgi-bin/carddisp.pl?gene=PLCB1">https://www.genecards.org/cgi-bin/carddisp.pl?gene=PLCB1</a>                 |
| HSD3B1  | Hydroxy-Delta-5-Steroid Dehydrogenase, 3 Beta- And Steroid Delta-Isomerase 1 | Protein Coding | 49 | GC01P119507 | 6.108185291 | <a href="https://www.genecards.org/cgi-bin/carddisp.pl?gene=HSD3B1">https://www.genecards.org/cgi-bin/carddisp.pl?gene=HSD3B1</a>               |
| HMGA1   | High Mobility Group AT-Hook 1                                                | Protein Coding | 53 | GC06P092259 | 6.101529121 | <a href="https://www.genecards.org/cgi-bin/carddisp.pl?gene=HMGA1">https://www.genecards.org/cgi-bin/carddisp.pl?gene=HMGA1</a>                 |
| ESRRA   | Estrogen Related Receptor Alpha                                              | Protein Coding | 53 | GC11P064305 | 6.093959808 | <a href="https://www.genecards.org/cgi-bin/carddisp.pl?gene=ESRRA">https://www.genecards.org/cgi-bin/carddisp.pl?gene=ESRRA</a>                 |
| FLT3    | Fms Related Receptor Tyrosine Kinase 3                                       | Protein Coding | 60 | GC13M028003 | 6.085923672 | <a href="https://www.genecards.org/cgi-bin/carddisp.pl?gene=FLT3">https://www.genecards.org/cgi-bin/carddisp.pl?gene=FLT3</a>                   |
| CPT1B   | Carnitine Palmitoyltransferase 1B                                            | Protein Coding | 51 | GC22M061624 | 6.08046484  | <a href="https://www.genecards.org/cgi-bin/carddisp.pl?gene=CPT1B">https://www.genecards.org/cgi-bin/carddisp.pl?gene=CPT1B</a>                 |
| GFAP    | Glial Fibrillary Acidic Protein                                              | Protein Coding | 55 | GC17M051925 | 6.074894428 | <a href="https://www.genecards.org/cgi-bin/carddisp.pl?gene=GFAP">https://www.genecards.org/cgi-bin/carddisp.pl?gene=GFAP</a>                   |

|        |                                                     |                |    |             |             |                                                                                                                                   |
|--------|-----------------------------------------------------|----------------|----|-------------|-------------|-----------------------------------------------------------------------------------------------------------------------------------|
| CHAT   | Choline O-Acetyltransferase                         | Protein Coding | 55 | GC10P049609 | 6.072665691 | <a href="https://www.genecards.org/cgi-bin/carddisp.pl?gene=GFAP">https://www.genecards.org/cgi-bin/carddisp.pl?gene=GFAP</a>     |
| DRD2   | Dopamine Receptor D2                                | Protein Coding | 56 | GC11M113409 | 6.065560818 | <a href="https://www.genecards.org/cgi-bin/carddisp.pl?gene=CHAT">https://www.genecards.org/cgi-bin/carddisp.pl?gene=CHAT</a>     |
| ABCC3  | ATP Binding Cassette Subfamily C Member 3           | Protein Coding | 53 | GC17P050634 | 6.057796955 | <a href="https://www.genecards.org/cgi-bin/carddisp.pl?gene=DRD2">https://www.genecards.org/cgi-bin/carddisp.pl?gene=DRD2</a>     |
| SLC7A5 | Solute Carrier Family 7 Member 5                    | Protein Coding | 51 | GC16M087830 | 6.049738884 | <a href="https://www.genecards.org/cgi-bin/carddisp.pl?gene=ABCC3">https://www.genecards.org/cgi-bin/carddisp.pl?gene=ABCC3</a>   |
| NNMT   | Nicotinamide N-Methyltransferase                    | Protein Coding | 51 | GC11P114257 | 6.028770924 | <a href="https://www.genecards.org/cgi-bin/carddisp.pl?gene=SLC7A5">https://www.genecards.org/cgi-bin/carddisp.pl?gene=SLC7A5</a> |
| FABP5  | Fatty Acid Binding Protein 5                        | Protein Coding | 49 | GC08P081282 | 6.027059078 | <a href="https://www.genecards.org/cgi-bin/carddisp.pl?gene=NNMT">https://www.genecards.org/cgi-bin/carddisp.pl?gene=NNMT</a>     |
| F9     | Coagulation Factor IX                               | Protein Coding | 54 | GC0XP139530 | 6.001158714 | <a href="https://www.genecards.org/cgi-bin/carddisp.pl?gene=FABP5">https://www.genecards.org/cgi-bin/carddisp.pl?gene=FABP5</a>   |
| AGTR1  | Angiotensin II Receptor Type 1                      | Protein Coding | 58 | GC03P148697 | 5.997434139 | <a href="https://www.genecards.org/cgi-bin/carddisp.pl?gene=F9">https://www.genecards.org/cgi-bin/carddisp.pl?gene=F9</a>         |
| AIFM1  | Apoptosis Inducing Factor Mitochondria Associated 1 | Protein Coding | 56 | GC0XM130129 | 5.993622303 | <a href="https://www.genecards.org/cgi-bin/carddisp.pl?gene=AGTR1">https://www.genecards.org/cgi-bin/carddisp.pl?gene=AGTR1</a>   |
| TG     | Thyroglobulin                                       | Protein Coding | 51 | GC08P132866 | 5.986973286 | <a href="https://www.genecards.org/cgi-bin/carddisp.pl?gene=AIFM1">https://www.genecards.org/cgi-bin/carddisp.pl?gene=AIFM1</a>   |
| LOX    | Lysyl Oxidase                                       | Protein Coding | 54 | GC05M122063 | 5.978069305 | <a href="https://www.genecards.org/cgi-bin/carddisp.pl?gene=TG">https://www.genecards.org/cgi-bin/carddisp.pl?gene=TG</a>         |
| SCP2   | Sterol Carrier Protein 2                            | Protein Coding | 52 | GC01P052927 | 5.971069813 | <a href="https://www.genecards.org/cgi-bin/carddisp.pl?gene=LOX">https://www.genecards.org/cgi-bin/carddisp.pl?gene=LOX</a>       |
| FOLH1  | Folate Hydrolase 1                                  | Protein Coding | 54 | GC11M099394 | 5.953541756 | <a href="https://www.genecards.org/cgi-bin/carddisp.pl?gene=SCP2">https://www.genecards.org/cgi-bin/carddisp.pl?gene=SCP2</a>     |
| ANXA5  | Annexin A5                                          | Protein Coding | 52 | GC04M121667 | 5.934454441 | <a href="https://www.genecards.org/cgi-bin/carddisp.pl?gene=FOLH1">https://www.genecards.org/cgi-bin/carddisp.pl?gene=FOLH1</a>   |
| F3     | Coagulation Factor III, Tissue Factor               | Protein Coding | 52 | GC01M094610 | 5.908566475 | <a href="https://www.genecards.org/cgi-bin/carddisp.pl?gene=ANXA5">https://www.genecards.org/cgi-bin/carddisp.pl?gene=ANXA5</a>   |

|         |                                                 |                |    |             |             |                                                                                                                                     |
|---------|-------------------------------------------------|----------------|----|-------------|-------------|-------------------------------------------------------------------------------------------------------------------------------------|
| CREB1   | CAMP Responsive Element Binding Protein 1       | Protein Coding | 56 | GC02P207529 | 5.901594639 | <a href="https://www.genecards.org/cgi-bin/carddisp.pl?gene=CREB1">https://www.genecards.org/cgi-bin/carddisp.pl?gene=CREB1</a>     |
| MAP2K1  | Mitogen-Activated Protein Kinase Kinase 1       | Protein Coding | 60 | GC15P066386 | 5.901299477 | <a href="https://www.genecards.org/cgi-bin/carddisp.pl?gene=MAP2K1">https://www.genecards.org/cgi-bin/carddisp.pl?gene=MAP2K1</a>   |
| HGSNAT  | Heparan-Alpha-Glucosaminide N-Acetyltransferase | Protein Coding | 43 | GC08P043140 | 5.899586678 | <a href="https://www.genecards.org/cgi-bin/carddisp.pl?gene=HGSNAT">https://www.genecards.org/cgi-bin/carddisp.pl?gene=HGSNAT</a>   |
| CCL11   | C-C Motif Chemokine Ligand 11                   | Protein Coding | 52 | GC17P034285 | 5.89659977  | <a href="https://www.genecards.org/cgi-bin/carddisp.pl?gene=CCL11">https://www.genecards.org/cgi-bin/carddisp.pl?gene=CCL11</a>     |
| SST     | Somatostatin                                    | Protein Coding | 47 | GC03M187668 | 5.892080307 | <a href="https://www.genecards.org/cgi-bin/carddisp.pl?gene=SST">https://www.genecards.org/cgi-bin/carddisp.pl?gene=SST</a>         |
| ABCB7   | ATP Binding Cassette Subfamily B Member 7       | Protein Coding | 50 | GC0XM075053 | 5.879004955 | <a href="https://www.genecards.org/cgi-bin/carddisp.pl?gene=ABCB7">https://www.genecards.org/cgi-bin/carddisp.pl?gene=ABCB7</a>     |
| NFKBIA  | NFKB Inhibitor Alpha                            | Protein Coding | 57 | GC14M035401 | 5.857986927 | <a href="https://www.genecards.org/cgi-bin/carddisp.pl?gene=NFKBIA">https://www.genecards.org/cgi-bin/carddisp.pl?gene=NFKBIA</a>   |
| ASNS    | Asparagine Synthetase (Glutamine-Hydrolyzing)   | Protein Coding | 54 | GC07M097854 | 5.841819763 | <a href="https://www.genecards.org/cgi-bin/carddisp.pl?gene=ASNS">https://www.genecards.org/cgi-bin/carddisp.pl?gene=ASNS</a>       |
| HNRNPA1 | Heterogeneous Nuclear Ribonucleoprotein A1      | Protein Coding | 55 | GC12P054280 | 5.838124752 | <a href="https://www.genecards.org/cgi-bin/carddisp.pl?gene=HNRNPA1">https://www.genecards.org/cgi-bin/carddisp.pl?gene=HNRNPA1</a> |
| ARSH    | Arylsulfatase Family Member H                   | Protein Coding | 39 | GC0XP003006 | 5.814909458 | <a href="https://www.genecards.org/cgi-bin/carddisp.pl?gene=ARSH">https://www.genecards.org/cgi-bin/carddisp.pl?gene=ARSH</a>       |
| UGT2B4  | UDP Glucuronosyltransferase Family 2 Member B4  | Protein Coding | 47 | GC04M069484 | 5.801847935 | <a href="https://www.genecards.org/cgi-bin/carddisp.pl?gene=UGT2B4">https://www.genecards.org/cgi-bin/carddisp.pl?gene=UGT2B4</a>   |
| GAD1    | Glutamate Decarboxylase 1                       | Protein Coding | 56 | GC02P170813 | 5.800939083 | <a href="https://www.genecards.org/cgi-bin/carddisp.pl?gene=GAD1">https://www.genecards.org/cgi-bin/carddisp.pl?gene=GAD1</a>       |
| GLO1    | Glyoxalase I                                    | Protein Coding | 52 | GC06M071882 | 5.783227921 | <a href="https://www.genecards.org/cgi-bin/carddisp.pl?gene=GLO1">https://www.genecards.org/cgi-bin/carddisp.pl?gene=GLO1</a>       |
| TPH2    | Tryptophan Hydroxylase 2                        | Protein Coding | 56 | GC12P071938 | 5.7809062   | <a href="https://www.genecards.org/cgi-bin/carddisp.pl?gene=TPH2">https://www.genecards.org/cgi-bin/carddisp.pl?gene=TPH2</a>       |
| CTSA    | Cathepsin A                                     | Protein Coding | 53 | GC20P045890 | 5.778818607 | <a href="https://www.genecards.org/cgi-bin/carddisp.pl?gene=CTSA">https://www.genecards.org/cgi-bin/carddisp.pl?gene=CTSA</a>       |

|         |                                                   |                |    |             |             |                                                                                                                                     |
|---------|---------------------------------------------------|----------------|----|-------------|-------------|-------------------------------------------------------------------------------------------------------------------------------------|
| CRH     | Corticotropin Releasing Hormone                   | Protein Coding | 50 | GC08M066176 | 5.773647785 | <a href="https://www.genecards.org/cgi-bin/carddisp.pl?gene=CTSA">https://www.genecards.org/cgi-bin/carddisp.pl?gene=CTSA</a>       |
| EP300   | E1A Binding Protein P300                          | Protein Coding | 59 | GC22P045272 | 5.772609711 | <a href="https://www.genecards.org/cgi-bin/carddisp.pl?gene=CRH">https://www.genecards.org/cgi-bin/carddisp.pl?gene=CRH</a>         |
| FGF2    | Fibroblast Growth Factor 2                        | Protein Coding | 52 | GC04P122826 | 5.771065235 | <a href="https://www.genecards.org/cgi-bin/carddisp.pl?gene=EP300">https://www.genecards.org/cgi-bin/carddisp.pl?gene=EP300</a>     |
| MGLL    | Monoglyceride Lipase                              | Protein Coding | 51 | GC03M127689 | 5.765919685 | <a href="https://www.genecards.org/cgi-bin/carddisp.pl?gene=FGF2">https://www.genecards.org/cgi-bin/carddisp.pl?gene=FGF2</a>       |
| MAPK3   | Mitogen-Activated Protein Kinase 3                | Protein Coding | 56 | GC16M038440 | 5.753620148 | <a href="https://www.genecards.org/cgi-bin/carddisp.pl?gene=MGLL">https://www.genecards.org/cgi-bin/carddisp.pl?gene=MGLL</a>       |
| ABCC6   | ATP Binding Cassette Subfamily C Member 6         | Protein Coding | 53 | GC16M016148 | 5.726374149 | <a href="https://www.genecards.org/cgi-bin/carddisp.pl?gene=MAPK3">https://www.genecards.org/cgi-bin/carddisp.pl?gene=MAPK3</a>     |
| AGPAT1  | 1-Acylglycerol-3-Phosphate O-Acyltransferase 1    | Protein Coding | 47 | GC06M032168 | 5.723912716 | <a href="https://www.genecards.org/cgi-bin/carddisp.pl?gene=ABCC6">https://www.genecards.org/cgi-bin/carddisp.pl?gene=ABCC6</a>     |
| DMD     | Dystrophin                                        | Protein Coding | 52 | GC0XM031097 | 5.719425678 | <a href="https://www.genecards.org/cgi-bin/carddisp.pl?gene=AGPAT1">https://www.genecards.org/cgi-bin/carddisp.pl?gene=AGPAT1</a>   |
| SULT2B1 | Sulfotransferase Family 2B Member 1               | Protein Coding | 52 | GC19P048552 | 5.709708691 | <a href="https://www.genecards.org/cgi-bin/carddisp.pl?gene=DMD">https://www.genecards.org/cgi-bin/carddisp.pl?gene=DMD</a>         |
| MET     | MET Proto-Oncogene, Receptor Tyrosine Kinase      | Protein Coding | 61 | GC07P116672 | 5.706713676 | <a href="https://www.genecards.org/cgi-bin/carddisp.pl?gene=SULT2B1">https://www.genecards.org/cgi-bin/carddisp.pl?gene=SULT2B1</a> |
| MAPT    | Microtubule Associated Protein Tau                | Protein Coding | 57 | GC17P045894 | 5.706644535 | <a href="https://www.genecards.org/cgi-bin/carddisp.pl?gene=MET">https://www.genecards.org/cgi-bin/carddisp.pl?gene=MET</a>         |
| PTPN22  | Protein Tyrosine Phosphatase Non-Receptor Type 22 | Protein Coding | 54 | GC01M113813 | 5.706405664 | <a href="https://www.genecards.org/cgi-bin/carddisp.pl?gene=MAPT">https://www.genecards.org/cgi-bin/carddisp.pl?gene=MAPT</a>       |
| PGAM2   | Phosphoglycerate Mutase 2                         | Protein Coding | 51 | GC07M044062 | 5.703668118 | <a href="https://www.genecards.org/cgi-bin/carddisp.pl?gene=PTPN22">https://www.genecards.org/cgi-bin/carddisp.pl?gene=PTPN22</a>   |
| EGF     | Epidermal Growth Factor                           | Protein Coding | 58 | GC04P109912 | 5.701561451 | <a href="https://www.genecards.org/cgi-bin/carddisp.pl?gene=PGAM2">https://www.genecards.org/cgi-bin/carddisp.pl?gene=PGAM2</a>     |
| ACSM1   | Acyl-CoA Synthetase Medium Chain Family Member 1  | Protein Coding | 46 | GC16M020634 | 5.699780464 | <a href="https://www.genecards.org/cgi-bin/carddisp.pl?gene=EGF">https://www.genecards.org/cgi-bin/carddisp.pl?gene=EGF</a>         |
|         |                                                   |                |    |             |             | <a href="https://www.genecards.org/cgi-bin/carddisp.pl?gene=ACSM1">https://www.genecards.org/cgi-bin/carddisp.pl?gene=ACSM1</a>     |

|          |                                                          |                |    |             |             |                                                                                                                                       |
|----------|----------------------------------------------------------|----------------|----|-------------|-------------|---------------------------------------------------------------------------------------------------------------------------------------|
| PSEN1    | Presenilin 1                                             | Protein Coding | 60 | GC14P073136 | 5.696412563 | <a href="https://www.genecards.org/cgi-bin/carddisp.pl?gene=PSEN1">https://www.genecards.org/cgi-bin/carddisp.pl?gene=PSEN1</a>       |
| F5       | Coagulation Factor V                                     | Protein Coding | 53 | GC01M169511 | 5.685031414 | <a href="https://www.genecards.org/cgi-bin/carddisp.pl?gene=F5">https://www.genecards.org/cgi-bin/carddisp.pl?gene=F5</a>             |
| SLC5A4   | Solute Carrier Family 5 Member 4                         | Protein Coding | 46 | GC22M032218 | 5.675738335 | <a href="https://www.genecards.org/cgi-bin/carddisp.pl?gene=SLC5A4">https://www.genecards.org/cgi-bin/carddisp.pl?gene=SLC5A4</a>     |
| NT5E     | 5'-Nucleotidase Ecto                                     | Protein Coding | 59 | GC06P085449 | 5.674291611 | <a href="https://www.genecards.org/cgi-bin/carddisp.pl?gene=NT5E">https://www.genecards.org/cgi-bin/carddisp.pl?gene=NT5E</a>         |
| DCK      | Deoxycytidine Kinase                                     | Protein Coding | 50 | GC04P070992 | 5.673641205 | <a href="https://www.genecards.org/cgi-bin/carddisp.pl?gene=DCK">https://www.genecards.org/cgi-bin/carddisp.pl?gene=DCK</a>           |
| SCN4A    | Sodium Voltage-Gated Channel Alpha Subunit 4             | Protein Coding | 52 | GC17M063938 | 5.664630413 | <a href="https://www.genecards.org/cgi-bin/carddisp.pl?gene=SCN4A">https://www.genecards.org/cgi-bin/carddisp.pl?gene=SCN4A</a>       |
| THRA     | Thyroid Hormone Receptor Alpha                           | Protein Coding | 55 | GC17P040058 | 5.65968132  | <a href="https://www.genecards.org/cgi-bin/carddisp.pl?gene=THRA">https://www.genecards.org/cgi-bin/carddisp.pl?gene=THRA</a>         |
| HLA-DRB1 | Major Histocompatibility Complex, Class II, DR Beta 1    | Protein Coding | 53 | GC06M071772 | 5.655965805 | <a href="https://www.genecards.org/cgi-bin/carddisp.pl?gene=HLA-DRB1">https://www.genecards.org/cgi-bin/carddisp.pl?gene=HLA-DRB1</a> |
| HDAC9    | Histone Deacetylase 9                                    | Protein Coding | 56 | GC07P018086 | 5.649218082 | <a href="https://www.genecards.org/cgi-bin/carddisp.pl?gene=HDAC9">https://www.genecards.org/cgi-bin/carddisp.pl?gene=HDAC9</a>       |
| CREBBP   | CREB Binding Protein                                     | Protein Coding | 60 | GC16M008258 | 5.642336845 | <a href="https://www.genecards.org/cgi-bin/carddisp.pl?gene=CREBBP">https://www.genecards.org/cgi-bin/carddisp.pl?gene=CREBBP</a>     |
| KARS1    | Lysyl-TRNA Synthetase 1                                  | Protein Coding | 52 | GC16M075800 | 5.635137081 | <a href="https://www.genecards.org/cgi-bin/carddisp.pl?gene=KARS1">https://www.genecards.org/cgi-bin/carddisp.pl?gene=KARS1</a>       |
| EIF2S1   | Eukaryotic Translation Initiation Factor 2 Subunit Alpha | Protein Coding | 50 | GC14P067359 | 5.618702412 | <a href="https://www.genecards.org/cgi-bin/carddisp.pl?gene=EIF2S1">https://www.genecards.org/cgi-bin/carddisp.pl?gene=EIF2S1</a>     |
| FABP3    | Fatty Acid Binding Protein 3                             | Protein Coding | 50 | GC01M031365 | 5.583105087 | <a href="https://www.genecards.org/cgi-bin/carddisp.pl?gene=FABP3">https://www.genecards.org/cgi-bin/carddisp.pl?gene=FABP3</a>       |
| LPXN     | Leupaxin                                                 | Protein Coding | 47 | GC11M099445 | 5.580239773 | <a href="https://www.genecards.org/cgi-bin/carddisp.pl?gene=LPXN">https://www.genecards.org/cgi-bin/carddisp.pl?gene=LPXN</a>         |
| VDAC1    | Voltage Dependent Anion Channel 1                        | Protein Coding | 53 | GC05M133975 | 5.569249153 | <a href="https://www.genecards.org/cgi-bin/carddisp.pl?gene=VDAC1">https://www.genecards.org/cgi-bin/carddisp.pl?gene=VDAC1</a>       |

|         |                                                                                                   |                |    |             |             |                                                                                                                                     |
|---------|---------------------------------------------------------------------------------------------------|----------------|----|-------------|-------------|-------------------------------------------------------------------------------------------------------------------------------------|
| EHMT2   | Euchromatic Histone Lysine Methyltransferase 2                                                    | Protein Coding | 52 | GC06M031879 | 5.56857872  | <a href="https://www.genecards.org/cgi-bin/carddisp.pl?gene=EHMT2">https://www.genecards.org/cgi-bin/carddisp.pl?gene=EHMT2</a>     |
| HNMT    | Histamine N-Methyltransferase                                                                     | Protein Coding | 52 | GC02P137964 | 5.568031788 | <a href="https://www.genecards.org/cgi-bin/carddisp.pl?gene=HNMT">https://www.genecards.org/cgi-bin/carddisp.pl?gene=HNMT</a>       |
| IL1RN   | Interleukin 1 Receptor Antagonist                                                                 | Protein Coding | 57 | GC02P123802 | 5.564380646 | <a href="https://www.genecards.org/cgi-bin/carddisp.pl?gene=IL1RN">https://www.genecards.org/cgi-bin/carddisp.pl?gene=IL1RN</a>     |
| HLA-A   | Major Histocompatibility Complex, Class I, A                                                      | Protein Coding | 52 | GC06P092113 | 5.557308197 | <a href="https://www.genecards.org/cgi-bin/carddisp.pl?gene=HLA-A">https://www.genecards.org/cgi-bin/carddisp.pl?gene=HLA-A</a>     |
| FGFR2   | Fibroblast Growth Factor Receptor 2                                                               | Protein Coding | 63 | GC10M121478 | 5.551764965 | <a href="https://www.genecards.org/cgi-bin/carddisp.pl?gene=FGFR2">https://www.genecards.org/cgi-bin/carddisp.pl?gene=FGFR2</a>     |
| SMARCA4 | SWI/SNF Related, Matrix Associated, Actin Dependent Regulator Of Chromatin, Subfamily A, Member 4 | Protein Coding | 57 | GC19P010932 | 5.540520191 | <a href="https://www.genecards.org/cgi-bin/carddisp.pl?gene=SMARCA4">https://www.genecards.org/cgi-bin/carddisp.pl?gene=SMARCA4</a> |
| GNRH1   | Gonadotropin Releasing Hormone 1                                                                  | Protein Coding | 47 | GC08M025419 | 5.540391922 | <a href="https://www.genecards.org/cgi-bin/carddisp.pl?gene=GNRH1">https://www.genecards.org/cgi-bin/carddisp.pl?gene=GNRH1</a>     |
| ARNT    | Aryl Hydrocarbon Receptor Nuclear Translocator                                                    | Protein Coding | 51 | GC01M150809 | 5.535038948 | <a href="https://www.genecards.org/cgi-bin/carddisp.pl?gene=ARNT">https://www.genecards.org/cgi-bin/carddisp.pl?gene=ARNT</a>       |
| ANPEP   | Alanyl Aminopeptidase, Membrane                                                                   | Protein Coding | 57 | GC15M089784 | 5.533632755 | <a href="https://www.genecards.org/cgi-bin/carddisp.pl?gene=ANPEP">https://www.genecards.org/cgi-bin/carddisp.pl?gene=ANPEP</a>     |
| PRKCA   | Protein Kinase C Alpha                                                                            | Protein Coding | 57 | GC17P066302 | 5.513727188 | <a href="https://www.genecards.org/cgi-bin/carddisp.pl?gene=PRKCA">https://www.genecards.org/cgi-bin/carddisp.pl?gene=PRKCA</a>     |
| CFH     | Complement Factor H                                                                               | Protein Coding | 54 | GC01P196621 | 5.510847569 | <a href="https://www.genecards.org/cgi-bin/carddisp.pl?gene=CFH">https://www.genecards.org/cgi-bin/carddisp.pl?gene=CFH</a>         |
| SMPD2   | Sphingomyelin Phosphodiesterase 2                                                                 | Protein Coding | 47 | GC06P109440 | 5.505710602 | <a href="https://www.genecards.org/cgi-bin/carddisp.pl?gene=SMPD2">https://www.genecards.org/cgi-bin/carddisp.pl?gene=SMPD2</a>     |
| KIT     | KIT Proto-Oncogene, Receptor Tyrosine Kinase                                                      | Protein Coding | 60 | GC04P054657 | 5.501556873 | <a href="https://www.genecards.org/cgi-bin/carddisp.pl?gene=KIT">https://www.genecards.org/cgi-bin/carddisp.pl?gene=KIT</a>         |
| TERT    | Telomerase Reverse Transcriptase                                                                  | Protein Coding | 58 | GC05M001253 | 5.497232914 | <a href="https://www.genecards.org/cgi-bin/carddisp.pl?gene=TERT">https://www.genecards.org/cgi-bin/carddisp.pl?gene=TERT</a>       |
| MBOAT7  | Membrane Bound O-Acyltransferase Domain Containing 7                                              | Protein Coding | 46 | GC19M054173 | 5.496452332 | <a href="https://www.genecards.org/cgi-bin/carddisp.pl?gene=MBOAT7">https://www.genecards.org/cgi-bin/carddisp.pl?gene=MBOAT7</a>   |



|          |                                                       |                |    |             |             |                                                                                                                                       |
|----------|-------------------------------------------------------|----------------|----|-------------|-------------|---------------------------------------------------------------------------------------------------------------------------------------|
| TK1      | Thymidine Kinase 1                                    | Protein Coding | 52 | GC17M078175 | 5.495685577 | <a href="https://www.genecards.org/cgi-bin/carddisp.pl?gene=MBOAT7">https://www.genecards.org/cgi-bin/carddisp.pl?gene=MBOAT7</a>     |
| MTM1     | Myotubularin 1                                        | Protein Coding | 50 | GC0XP150562 | 5.492345333 | <a href="https://www.genecards.org/cgi-bin/carddisp.pl?gene=TK1">https://www.genecards.org/cgi-bin/carddisp.pl?gene=TK1</a>           |
| SPTLC1   | Serine Palmitoyltransferase Long Chain Base Subunit 1 | Protein Coding | 53 | GC09M096508 | 5.490951538 | <a href="https://www.genecards.org/cgi-bin/carddisp.pl?gene=MTM1">https://www.genecards.org/cgi-bin/carddisp.pl?gene=MTM1</a>         |
| NFKB1    | Nuclear Factor Kappa B Subunit 1                      | Protein Coding | 60 | GC04P102501 | 5.488479137 | <a href="https://www.genecards.org/cgi-bin/carddisp.pl?gene=SPTLC1">https://www.genecards.org/cgi-bin/carddisp.pl?gene=SPTLC1</a>     |
| ERCC5    | ERCC Excision Repair 5, Endonuclease                  | Protein Coding | 51 | GC13P102845 | 5.477799416 | <a href="https://www.genecards.org/cgi-bin/carddisp.pl?gene=NFKB1">https://www.genecards.org/cgi-bin/carddisp.pl?gene=NFKB1</a>       |
| SP1      | Sp1 Transcription Factor                              | Protein Coding | 53 | GC12P053380 | 5.475884914 | <a href="https://www.genecards.org/cgi-bin/carddisp.pl?gene=ERCC5">https://www.genecards.org/cgi-bin/carddisp.pl?gene=ERCC5</a>       |
| HNRNPK   | Heterogeneous Nuclear Ribonucleoprotein K             | Protein Coding | 52 | GC09M096203 | 5.475253105 | <a href="https://www.genecards.org/cgi-bin/carddisp.pl?gene=SP1">https://www.genecards.org/cgi-bin/carddisp.pl?gene=SP1</a>           |
| NPPB     | Natriuretic Peptide B                                 | Protein Coding | 50 | GC01M011858 | 5.447532177 | <a href="https://www.genecards.org/cgi-bin/carddisp.pl?gene=HNRNPK">https://www.genecards.org/cgi-bin/carddisp.pl?gene=HNRNPK</a>     |
| TNFRSF1B | TNF Receptor Superfamily Member 1B                    | Protein Coding | 56 | GC01P012301 | 5.443855286 | <a href="https://www.genecards.org/cgi-bin/carddisp.pl?gene=NPPB">https://www.genecards.org/cgi-bin/carddisp.pl?gene=NPPB</a>         |
| SLC22A2  | Solute Carrier Family 22 Member 2                     | Protein Coding | 50 | GC06M160195 | 5.439086437 | <a href="https://www.genecards.org/cgi-bin/carddisp.pl?gene=TNFRSF1B">https://www.genecards.org/cgi-bin/carddisp.pl?gene=TNFRSF1B</a> |
| SLC25A3  | Solute Carrier Family 25 Member 3                     | Protein Coding | 51 | GC12P098593 | 5.434689522 | <a href="https://www.genecards.org/cgi-bin/carddisp.pl?gene=SLC22A2">https://www.genecards.org/cgi-bin/carddisp.pl?gene=SLC22A2</a>   |
| ABL1     | ABL Proto-Oncogene 1, Non-Receptor Tyrosine Kinase    | Protein Coding | 59 | GC09P130713 | 5.431687832 | <a href="https://www.genecards.org/cgi-bin/carddisp.pl?gene=SLC25A3">https://www.genecards.org/cgi-bin/carddisp.pl?gene=SLC25A3</a>   |
| SCARB2   | Scavenger Receptor Class B Member 2                   | Protein Coding | 53 | GC04M076158 | 5.430082798 | <a href="https://www.genecards.org/cgi-bin/carddisp.pl?gene=ABL1">https://www.genecards.org/cgi-bin/carddisp.pl?gene=ABL1</a>         |
| ENPP2    | Ectonucleotide Pyrophosphatase/Phosphodiesterase 2    | Protein Coding | 52 | GC08M119556 | 5.429513454 | <a href="https://www.genecards.org/cgi-bin/carddisp.pl?gene=SCARB2">https://www.genecards.org/cgi-bin/carddisp.pl?gene=SCARB2</a>     |
| DNM2     | Dynamin 2                                             | Protein Coding | 56 | GC19P010718 | 5.426211834 | <a href="https://www.genecards.org/cgi-bin/carddisp.pl?gene=ENPP2">https://www.genecards.org/cgi-bin/carddisp.pl?gene=ENPP2</a>       |

|          |                                                      |                |    |             |             |                                                                                                                                       |
|----------|------------------------------------------------------|----------------|----|-------------|-------------|---------------------------------------------------------------------------------------------------------------------------------------|
| ENO3     | Enolase 3                                            | Protein Coding | 55 | GC17P004948 | 5.420696259 | <a href="https://www.genecards.org/cgi-bin/carddisp.pl?gene=ENO3">https://www.genecards.org/cgi-bin/carddisp.pl?gene=ENO3</a>         |
| IGFBP2   | Insulin Like Growth Factor Binding Protein 2         | Protein Coding | 51 | GC02P216632 | 5.415290833 | <a href="https://www.genecards.org/cgi-bin/carddisp.pl?gene=IGFBP2">https://www.genecards.org/cgi-bin/carddisp.pl?gene=IGFBP2</a>     |
| AGA      | Aspartylglucosaminidase                              | Protein Coding | 52 | GC04M177430 | 5.402294636 | <a href="https://www.genecards.org/cgi-bin/carddisp.pl?gene=AGA">https://www.genecards.org/cgi-bin/carddisp.pl?gene=AGA</a>           |
| UROS     | Uroporphyrinogen III Synthase                        | Protein Coding | 48 | GC10M125784 | 5.398243904 | <a href="https://www.genecards.org/cgi-bin/carddisp.pl?gene=UROS">https://www.genecards.org/cgi-bin/carddisp.pl?gene=UROS</a>         |
| PDE5A    | Phosphodiesterase 5A                                 | Protein Coding | 52 | GC04M119494 | 5.394932747 | <a href="https://www.genecards.org/cgi-bin/carddisp.pl?gene=PDE5A">https://www.genecards.org/cgi-bin/carddisp.pl?gene=PDE5A</a>       |
| BLVRB    | Biliverdin Reductase B                               | Protein Coding | 46 | GC19M040447 | 5.39385891  | <a href="https://www.genecards.org/cgi-bin/carddisp.pl?gene=BLVRB">https://www.genecards.org/cgi-bin/carddisp.pl?gene=BLVRB</a>       |
| SERPINC1 | Serpin Family C Member 1                             | Protein Coding | 56 | GC01M174653 | 5.383127689 | <a href="https://www.genecards.org/cgi-bin/carddisp.pl?gene=SERPINC1">https://www.genecards.org/cgi-bin/carddisp.pl?gene=SERPINC1</a> |
| PLA2G5   | Phospholipase A2 Group V                             | Protein Coding | 48 | GC01P020028 | 5.379155159 | <a href="https://www.genecards.org/cgi-bin/carddisp.pl?gene=PLA2G5">https://www.genecards.org/cgi-bin/carddisp.pl?gene=PLA2G5</a>     |
| CD40LG   | CD40 Ligand                                          | Protein Coding | 57 | GC0XP136649 | 5.369486809 | <a href="https://www.genecards.org/cgi-bin/carddisp.pl?gene=CD40LG">https://www.genecards.org/cgi-bin/carddisp.pl?gene=CD40LG</a>     |
| NCOA2    | Nuclear Receptor Coactivator 2                       | Protein Coding | 52 | GC08M070109 | 5.368606567 | <a href="https://www.genecards.org/cgi-bin/carddisp.pl?gene=NCOA2">https://www.genecards.org/cgi-bin/carddisp.pl?gene=NCOA2</a>       |
| CEL      | Carboxyl Ester Lipase                                | Protein Coding | 52 | GC09P133061 | 5.360735893 | <a href="https://www.genecards.org/cgi-bin/carddisp.pl?gene=CEL">https://www.genecards.org/cgi-bin/carddisp.pl?gene=CEL</a>           |
| ADH5     | Alcohol Dehydrogenase 5 (Class III), Chi Polypeptide | Protein Coding | 53 | GC04M099070 | 5.359493732 | <a href="https://www.genecards.org/cgi-bin/carddisp.pl?gene=ADH5">https://www.genecards.org/cgi-bin/carddisp.pl?gene=ADH5</a>         |
| ACSL1    | Acyl-CoA Synthetase Long Chain Family Member 1       | Protein Coding | 52 | GC04M184755 | 5.358801365 | <a href="https://www.genecards.org/cgi-bin/carddisp.pl?gene=ACSL1">https://www.genecards.org/cgi-bin/carddisp.pl?gene=ACSL1</a>       |
| VWF      | Von Willebrand Factor                                | Protein Coding | 55 | GC12M005949 | 5.354763508 | <a href="https://www.genecards.org/cgi-bin/carddisp.pl?gene=VWF">https://www.genecards.org/cgi-bin/carddisp.pl?gene=VWF</a>           |
| FSHR     | Follicle Stimulating Hormone Receptor                | Protein Coding | 54 | GC02M048962 | 5.346429825 | <a href="https://www.genecards.org/cgi-bin/carddisp.pl?gene=FSHR">https://www.genecards.org/cgi-bin/carddisp.pl?gene=FSHR</a>         |

|          |                                                            |                |    |             |             |                                                                                                                                       |
|----------|------------------------------------------------------------|----------------|----|-------------|-------------|---------------------------------------------------------------------------------------------------------------------------------------|
| SAA1     | Serum Amyloid A1                                           | Protein Coding | 46 | GC11P018579 | 5.33243227  | <a href="https://www.genecards.org/cgi-bin/carddisp.pl?gene=SAA1">https://www.genecards.org/cgi-bin/carddisp.pl?gene=SAA1</a>         |
| PSTPIP1  | Proline-Serine-Threonine Phosphatase Interacting Protein 1 | Protein Coding | 50 | GC15P076993 | 5.325975895 | <a href="https://www.genecards.org/cgi-bin/carddisp.pl?gene=PSTPIP1">https://www.genecards.org/cgi-bin/carddisp.pl?gene=PSTPIP1</a>   |
| PDHB     | Pyruvate Dehydrogenase E1 Subunit Beta                     | Protein Coding | 52 | GC03M058428 | 5.320480824 | <a href="https://www.genecards.org/cgi-bin/carddisp.pl?gene=PDHB">https://www.genecards.org/cgi-bin/carddisp.pl?gene=PDHB</a>         |
| DAO      | D-Amino Acid Oxidase                                       | Protein Coding | 51 | GC12P108859 | 5.318780422 | <a href="https://www.genecards.org/cgi-bin/carddisp.pl?gene=DAO">https://www.genecards.org/cgi-bin/carddisp.pl?gene=DAO</a>           |
| SHC1     | SHC Adaptor Protein 1                                      | Protein Coding | 50 | GC01M154962 | 5.312389851 | <a href="https://www.genecards.org/cgi-bin/carddisp.pl?gene=SHC1">https://www.genecards.org/cgi-bin/carddisp.pl?gene=SHC1</a>         |
| PTH1R    | Parathyroid Hormone 1 Receptor                             | Protein Coding | 57 | GC03P046877 | 5.307143688 | <a href="https://www.genecards.org/cgi-bin/carddisp.pl?gene=PTH1R">https://www.genecards.org/cgi-bin/carddisp.pl?gene=PTH1R</a>       |
| GRIN2A   | Glutamate Ionotropic Receptor NMDA Type Subunit 2A         | Protein Coding | 59 | GC16M009753 | 5.30063343  | <a href="https://www.genecards.org/cgi-bin/carddisp.pl?gene=GRIN2A">https://www.genecards.org/cgi-bin/carddisp.pl?gene=GRIN2A</a>     |
| FABP12   | Fatty Acid Binding Protein 12                              | Protein Coding | 38 | GC08M081524 | 5.29920435  | <a href="https://www.genecards.org/cgi-bin/carddisp.pl?gene=FABP12">https://www.genecards.org/cgi-bin/carddisp.pl?gene=FABP12</a>     |
| IL6R     | Interleukin 6 Receptor                                     | Protein Coding | 57 | GC01P154405 | 5.290779114 | <a href="https://www.genecards.org/cgi-bin/carddisp.pl?gene=IL6R">https://www.genecards.org/cgi-bin/carddisp.pl?gene=IL6R</a>         |
| RAD51    | RAD51 Recombinase                                          | Protein Coding | 57 | GC15P040694 | 5.285461426 | <a href="https://www.genecards.org/cgi-bin/carddisp.pl?gene=RAD51">https://www.genecards.org/cgi-bin/carddisp.pl?gene=RAD51</a>       |
| HSP90AA1 | Heat Shock Protein 90 Alpha Family Class A Member 1        | Protein Coding | 57 | GC14M102080 | 5.282570362 | <a href="https://www.genecards.org/cgi-bin/carddisp.pl?gene=HSP90AA1">https://www.genecards.org/cgi-bin/carddisp.pl?gene=HSP90AA1</a> |
| STAT6    | Signal Transducer And Activator Of Transcription 6         | Protein Coding | 57 | GC12M057095 | 5.278360844 | <a href="https://www.genecards.org/cgi-bin/carddisp.pl?gene=STAT6">https://www.genecards.org/cgi-bin/carddisp.pl?gene=STAT6</a>       |
| APEX1    | Apurinic/Apyrimidinic Endodeoxyribonuclease 1              | Protein Coding | 52 | GC14P020455 | 5.276880264 | <a href="https://www.genecards.org/cgi-bin/carddisp.pl?gene=APEX1">https://www.genecards.org/cgi-bin/carddisp.pl?gene=APEX1</a>       |
| SLC22A12 | Solute Carrier Family 22 Member 12                         | Protein Coding | 51 | GC11P064609 | 5.276699543 | <a href="https://www.genecards.org/cgi-bin/carddisp.pl?gene=SLC22A12">https://www.genecards.org/cgi-bin/carddisp.pl?gene=SLC22A12</a> |
| TP63     | Tumor Protein P63                                          | Protein Coding | 53 | GC03P189598 | 5.272655487 | <a href="https://www.genecards.org/cgi-bin/carddisp.pl?gene=TP63">https://www.genecards.org/cgi-bin/carddisp.pl?gene=TP63</a>         |

|         |                                                                       |                |    |             |             |                                                                                                                                     |
|---------|-----------------------------------------------------------------------|----------------|----|-------------|-------------|-------------------------------------------------------------------------------------------------------------------------------------|
| DDIT3   | DNA Damage Inducible Transcript 3                                     | Protein Coding | 52 | GC12M057516 | 5.258716583 | <a href="https://www.genecards.org/cgi-bin/carddisp.pl?gene=DDIT3">https://www.genecards.org/cgi-bin/carddisp.pl?gene=DDIT3</a>     |
| APOH    | Apolipoprotein H                                                      | Protein Coding | 51 | GC17M066212 | 5.254735947 | <a href="https://www.genecards.org/cgi-bin/carddisp.pl?gene=APOH">https://www.genecards.org/cgi-bin/carddisp.pl?gene=APOH</a>       |
| KMO     | Kynurenine 3-Monooxygenase                                            | Protein Coding | 53 | GC01P241532 | 5.254042149 | <a href="https://www.genecards.org/cgi-bin/carddisp.pl?gene=KMO">https://www.genecards.org/cgi-bin/carddisp.pl?gene=KMO</a>         |
| CTSB    | Cathepsin B                                                           | Protein Coding | 59 | GC08M011842 | 5.253155708 | <a href="https://www.genecards.org/cgi-bin/carddisp.pl?gene=CTSB">https://www.genecards.org/cgi-bin/carddisp.pl?gene=CTSB</a>       |
| SRC     | SRC Proto-Oncogene, Non-Receptor Tyrosine Kinase                      | Protein Coding | 58 | GC20P037344 | 5.242369652 | <a href="https://www.genecards.org/cgi-bin/carddisp.pl?gene=SRC">https://www.genecards.org/cgi-bin/carddisp.pl?gene=SRC</a>         |
| DGKB    | Diacylglycerol Kinase Beta                                            | Protein Coding | 50 | GC07M014145 | 5.21872282  | <a href="https://www.genecards.org/cgi-bin/carddisp.pl?gene=DGKB">https://www.genecards.org/cgi-bin/carddisp.pl?gene=DGKB</a>       |
| GATA6   | GATA Binding Protein 6                                                | Protein Coding | 53 | GC18P022169 | 5.218309879 | <a href="https://www.genecards.org/cgi-bin/carddisp.pl?gene=GATA6">https://www.genecards.org/cgi-bin/carddisp.pl?gene=GATA6</a>     |
| IL3     | Interleukin 3                                                         | Protein Coding | 52 | GC05P132060 | 5.218032837 | <a href="https://www.genecards.org/cgi-bin/carddisp.pl?gene=IL3">https://www.genecards.org/cgi-bin/carddisp.pl?gene=IL3</a>         |
| CD46    | CD46 Molecule                                                         | Protein Coding | 55 | GC01P207752 | 5.215385437 | <a href="https://www.genecards.org/cgi-bin/carddisp.pl?gene=CD46">https://www.genecards.org/cgi-bin/carddisp.pl?gene=CD46</a>       |
| F10     | Coagulation Factor X                                                  | Protein Coding | 57 | GC13P113122 | 5.205245495 | <a href="https://www.genecards.org/cgi-bin/carddisp.pl?gene=F10">https://www.genecards.org/cgi-bin/carddisp.pl?gene=F10</a>         |
| FLNA    | Filamin A                                                             | Protein Coding | 55 | GC0XM154348 | 5.204764843 | <a href="https://www.genecards.org/cgi-bin/carddisp.pl?gene=FLNA">https://www.genecards.org/cgi-bin/carddisp.pl?gene=FLNA</a>       |
| ACOT1   | Acyl-CoA Thioesterase 1                                               | Protein Coding | 42 | GC14P073493 | 5.202662945 | <a href="https://www.genecards.org/cgi-bin/carddisp.pl?gene=ACOT1">https://www.genecards.org/cgi-bin/carddisp.pl?gene=ACOT1</a>     |
| PIK3CB  | Phosphatidylinositol-4,5-Bisphosphate 3-Kinase Catalytic Subunit Beta | Protein Coding | 55 | GC03M138652 | 5.201896667 | <a href="https://www.genecards.org/cgi-bin/carddisp.pl?gene=PIK3CB">https://www.genecards.org/cgi-bin/carddisp.pl?gene=PIK3CB</a>   |
| CDKN2A  | Cyclin Dependent Kinase Inhibitor 2A                                  | Protein Coding | 57 | GC09M021967 | 5.197295666 | <a href="https://www.genecards.org/cgi-bin/carddisp.pl?gene=CDKN2A">https://www.genecards.org/cgi-bin/carddisp.pl?gene=CDKN2A</a>   |
| ALOX15B | Arachidonate 15-Lipoxygenase Type B                                   | Protein Coding | 48 | GC17P008039 | 5.185217857 | <a href="https://www.genecards.org/cgi-bin/carddisp.pl?gene=ALOX15B">https://www.genecards.org/cgi-bin/carddisp.pl?gene=ALOX15B</a> |

|         |                                                          |                |    |             |             |                                                                                                                                     |
|---------|----------------------------------------------------------|----------------|----|-------------|-------------|-------------------------------------------------------------------------------------------------------------------------------------|
| GSK3A   | Glycogen Synthase Kinase 3 Alpha                         | Protein Coding | 56 | GC19M070637 | 5.179674149 | <a href="https://www.genecards.org/cgi-bin/carddisp.pl?gene=ALOX15B">https://www.genecards.org/cgi-bin/carddisp.pl?gene=ALOX15B</a> |
| AQP2    | Aquaporin 2                                              | Protein Coding | 53 | GC12P049950 | 5.167989254 | <a href="https://www.genecards.org/cgi-bin/carddisp.pl?gene=GSK3A">https://www.genecards.org/cgi-bin/carddisp.pl?gene=GSK3A</a>     |
| RPS6KB1 | Ribosomal Protein S6 Kinase B1                           | Protein Coding | 55 | GC17P059893 | 5.164863586 | <a href="https://www.genecards.org/cgi-bin/carddisp.pl?gene=AQP2">https://www.genecards.org/cgi-bin/carddisp.pl?gene=AQP2</a>       |
| CXCL10  | C-X-C Motif Chemokine Ligand 10                          | Protein Coding | 51 | GC04M076021 | 5.147573948 | <a href="https://www.genecards.org/cgi-bin/carddisp.pl?gene=RPS6KB1">https://www.genecards.org/cgi-bin/carddisp.pl?gene=RPS6KB1</a> |
| APBB1   | Amyloid Beta Precursor Protein Binding Family B Member 1 | Protein Coding | 51 | GC11M006936 | 5.13942337  | <a href="https://www.genecards.org/cgi-bin/carddisp.pl?gene=CXCL10">https://www.genecards.org/cgi-bin/carddisp.pl?gene=CXCL10</a>   |
| FDX1    | Ferredoxin 1                                             | Protein Coding | 45 | GC11P110429 | 5.134989262 | <a href="https://www.genecards.org/cgi-bin/carddisp.pl?gene=APBB1">https://www.genecards.org/cgi-bin/carddisp.pl?gene=APBB1</a>     |
| CD44    | CD44 Molecule (Indian Blood Group)                       | Protein Coding | 55 | GC11P035139 | 5.127356052 | <a href="https://www.genecards.org/cgi-bin/carddisp.pl?gene=FDX1">https://www.genecards.org/cgi-bin/carddisp.pl?gene=FDX1</a>       |
| IL4I1   | Interleukin 4 Induced 1                                  | Protein Coding | 46 | GC19M070913 | 5.122427464 | <a href="https://www.genecards.org/cgi-bin/carddisp.pl?gene=CD44">https://www.genecards.org/cgi-bin/carddisp.pl?gene=CD44</a>       |
| IL17A   | Interleukin 17A                                          | Protein Coding | 50 | GC06P052186 | 5.119236469 | <a href="https://www.genecards.org/cgi-bin/carddisp.pl?gene=IL4I1">https://www.genecards.org/cgi-bin/carddisp.pl?gene=IL4I1</a>     |
| AOC3    | Amine Oxidase Copper Containing 3                        | Protein Coding | 52 | GC17P042851 | 5.119176865 | <a href="https://www.genecards.org/cgi-bin/carddisp.pl?gene=IL17A">https://www.genecards.org/cgi-bin/carddisp.pl?gene=IL17A</a>     |
| KAT5    | Lysine Acetyltransferase 5                               | Protein Coding | 57 | GC11P065711 | 5.108136654 | <a href="https://www.genecards.org/cgi-bin/carddisp.pl?gene=AOC3">https://www.genecards.org/cgi-bin/carddisp.pl?gene=AOC3</a>       |
| HGF     | Hepatocyte Growth Factor                                 | Protein Coding | 58 | GC07M081699 | 5.10415411  | <a href="https://www.genecards.org/cgi-bin/carddisp.pl?gene=KAT5">https://www.genecards.org/cgi-bin/carddisp.pl?gene=KAT5</a>       |
| XRCC1   | X-Ray Repair Cross Complementing 1                       | Protein Coding | 51 | GC19M043543 | 5.097961426 | <a href="https://www.genecards.org/cgi-bin/carddisp.pl?gene=HGF">https://www.genecards.org/cgi-bin/carddisp.pl?gene=HGF</a>         |
| FFAR1   | Free Fatty Acid Receptor 1                               | Protein Coding | 47 | GC19P073870 | 5.093933582 | <a href="https://www.genecards.org/cgi-bin/carddisp.pl?gene=XRCC1">https://www.genecards.org/cgi-bin/carddisp.pl?gene=XRCC1</a>     |
| EPAS1   | Endothelial PAS Domain Protein 1                         | Protein Coding | 57 | GC02P046293 | 5.093504906 | <a href="https://www.genecards.org/cgi-bin/carddisp.pl?gene=FFAR1">https://www.genecards.org/cgi-bin/carddisp.pl?gene=FFAR1</a>     |

|         |                                                                                  |                |    |             |             |                                                                                                                                   |
|---------|----------------------------------------------------------------------------------|----------------|----|-------------|-------------|-----------------------------------------------------------------------------------------------------------------------------------|
| ABCC5   | ATP Binding Cassette Subfamily C Member 5                                        | Protein Coding | 51 | GC03M183919 | 5.09292078  | <a href="https://www.genecards.org/cgi-bin/carddisp.pl?gene=ABCC5">https://www.genecards.org/cgi-bin/carddisp.pl?gene=ABCC5</a>   |
| ITGB2   | Integrin Subunit Beta 2                                                          | Protein Coding | 57 | GC21M044885 | 5.083768845 | <a href="https://www.genecards.org/cgi-bin/carddisp.pl?gene=ITGB2">https://www.genecards.org/cgi-bin/carddisp.pl?gene=ITGB2</a>   |
| ACOT8   | Acyl-CoA Thioesterase 8                                                          | Protein Coding | 44 | GC20M045841 | 5.071051598 | <a href="https://www.genecards.org/cgi-bin/carddisp.pl?gene=ACOT8">https://www.genecards.org/cgi-bin/carddisp.pl?gene=ACOT8</a>   |
| APPL1   | Adaptor Protein, Phosphotyrosine Interacting With PH Domain And Leucine Zipper 1 | Protein Coding | 51 | GC03P057227 | 5.065500736 | <a href="https://www.genecards.org/cgi-bin/carddisp.pl?gene=APPL1">https://www.genecards.org/cgi-bin/carddisp.pl?gene=APPL1</a>   |
| HMOX2   | Heme Oxygenase 2                                                                 | Protein Coding | 53 | GC16P004474 | 5.051269531 | <a href="https://www.genecards.org/cgi-bin/carddisp.pl?gene=HMOX2">https://www.genecards.org/cgi-bin/carddisp.pl?gene=HMOX2</a>   |
| CSNK2B  | Casein Kinase 2 Beta                                                             | Protein Coding | 55 | GC06P092157 | 5.048334599 | <a href="https://www.genecards.org/cgi-bin/carddisp.pl?gene=CSNK2B">https://www.genecards.org/cgi-bin/carddisp.pl?gene=CSNK2B</a> |
| SRD5A3  | Steroid 5 Alpha-Reductase 3                                                      | Protein Coding | 50 | GC04P055346 | 5.043519974 | <a href="https://www.genecards.org/cgi-bin/carddisp.pl?gene=SRD5A3">https://www.genecards.org/cgi-bin/carddisp.pl?gene=SRD5A3</a> |
| BCR     | BCR Activator Of RhoGEF And GTPase                                               | Protein Coding | 59 | GC22P023179 | 5.043236256 | <a href="https://www.genecards.org/cgi-bin/carddisp.pl?gene=BCR">https://www.genecards.org/cgi-bin/carddisp.pl?gene=BCR</a>       |
| CPT1C   | Carnitine Palmitoyltransferase 1C                                                | Protein Coding | 50 | GC19P049690 | 5.040052414 | <a href="https://www.genecards.org/cgi-bin/carddisp.pl?gene=CPT1C">https://www.genecards.org/cgi-bin/carddisp.pl?gene=CPT1C</a>   |
| NGF     | Nerve Growth Factor                                                              | Protein Coding | 58 | GC01M115285 | 5.035580635 | <a href="https://www.genecards.org/cgi-bin/carddisp.pl?gene=NGF">https://www.genecards.org/cgi-bin/carddisp.pl?gene=NGF</a>       |
| RARA    | Retinoic Acid Receptor Alpha                                                     | Protein Coding | 57 | GC17P040309 | 5.034917831 | <a href="https://www.genecards.org/cgi-bin/carddisp.pl?gene=RARA">https://www.genecards.org/cgi-bin/carddisp.pl?gene=RARA</a>     |
| OSBP    | Oxysterol Binding Protein                                                        | Protein Coding | 47 | GC11M099460 | 5.02068615  | <a href="https://www.genecards.org/cgi-bin/carddisp.pl?gene=OSBP">https://www.genecards.org/cgi-bin/carddisp.pl?gene=OSBP</a>     |
| RELA    | RELA Proto-Oncogene, NF-KB Subunit                                               | Protein Coding | 59 | GC11M065653 | 5.020265102 | <a href="https://www.genecards.org/cgi-bin/carddisp.pl?gene=RELA">https://www.genecards.org/cgi-bin/carddisp.pl?gene=RELA</a>     |
| GPBAR1  | G Protein-Coupled Bile Acid Receptor 1                                           | Protein Coding | 47 | GC02P218259 | 5.01853466  | <a href="https://www.genecards.org/cgi-bin/carddisp.pl?gene=GPBAR1">https://www.genecards.org/cgi-bin/carddisp.pl?gene=GPBAR1</a> |
| SLC22A6 | Solute Carrier Family 22 Member 6                                                | Protein Coding | 51 | GC11M099607 | 5.0164814   | <a href="https://www.genecards.org/cgi-bin/carddisp.pl?gene=EPAS1">https://www.genecards.org/cgi-bin/carddisp.pl?gene=EPAS1</a>   |

|          |                                                                                                                            |                |    |             |             |                                                                                                                                       |
|----------|----------------------------------------------------------------------------------------------------------------------------|----------------|----|-------------|-------------|---------------------------------------------------------------------------------------------------------------------------------------|
| SLC16A2  | Solute Carrier Family 16 Member 2                                                                                          | Protein Coding | 50 | GC0XP074510 | 5.015535355 | <a href="https://www.genecards.org/cgi-bin/carddisp.pl?gene=SLC16A2">https://www.genecards.org/cgi-bin/carddisp.pl?gene=SLC16A2</a>   |
| RET      | Ret Proto-Oncogene                                                                                                         | Protein Coding | 61 | GC10P043237 | 5.005290031 | <a href="https://www.genecards.org/cgi-bin/carddisp.pl?gene=RET">https://www.genecards.org/cgi-bin/carddisp.pl?gene=RET</a>           |
| DHODH    | Dihydroorotate Dehydrogenase (Quinone)                                                                                     | Protein Coding | 53 | GC16P072008 | 5.001195908 | <a href="https://www.genecards.org/cgi-bin/carddisp.pl?gene=DHODH">https://www.genecards.org/cgi-bin/carddisp.pl?gene=DHODH</a>       |
| PLCG1    | Phospholipase C Gamma 1                                                                                                    | Protein Coding | 53 | GC20P041136 | 4.999927521 | <a href="https://www.genecards.org/cgi-bin/carddisp.pl?gene=PLCG1">https://www.genecards.org/cgi-bin/carddisp.pl?gene=PLCG1</a>       |
| IL6ST    | Interleukin 6 Cytokine Family Signal Transducer                                                                            | Protein Coding | 56 | GC05M055935 | 4.997031212 | <a href="https://www.genecards.org/cgi-bin/carddisp.pl?gene=IL6ST">https://www.genecards.org/cgi-bin/carddisp.pl?gene=IL6ST</a>       |
| SPHK1    | Sphingosine Kinase 1                                                                                                       | Protein Coding | 53 | GC17P076376 | 4.993997097 | <a href="https://www.genecards.org/cgi-bin/carddisp.pl?gene=SPHK1">https://www.genecards.org/cgi-bin/carddisp.pl?gene=SPHK1</a>       |
| SLC3A2   | Solute Carrier Family 3 Member 2                                                                                           | Protein Coding | 50 | GC11P062856 | 4.993354797 | <a href="https://www.genecards.org/cgi-bin/carddisp.pl?gene=SLC3A2">https://www.genecards.org/cgi-bin/carddisp.pl?gene=SLC3A2</a>     |
| MIF      | Macrophage Migration Inhibitory Factor                                                                                     | Protein Coding | 55 | GC22P023894 | 4.985460281 | <a href="https://www.genecards.org/cgi-bin/carddisp.pl?gene=MIF">https://www.genecards.org/cgi-bin/carddisp.pl?gene=MIF</a>           |
| GIP      | Gastric Inhibitory Polypeptide                                                                                             | Protein Coding | 44 | GC17M048958 | 4.984392643 | <a href="https://www.genecards.org/cgi-bin/carddisp.pl?gene=GIP">https://www.genecards.org/cgi-bin/carddisp.pl?gene=GIP</a>           |
| GART     | Phosphoribosylglycinamide Formyltransferase, Phosphoribosylglycinamide Synthetase, Phosphoribosylaminoimidazole Synthetase | Protein Coding | 50 | GC21M033503 | 4.982872963 | <a href="https://www.genecards.org/cgi-bin/carddisp.pl?gene=GART">https://www.genecards.org/cgi-bin/carddisp.pl?gene=GART</a>         |
| SELP     | Selectin P                                                                                                                 | Protein Coding | 52 | GC01M169558 | 4.982637405 | <a href="https://www.genecards.org/cgi-bin/carddisp.pl?gene=SELP">https://www.genecards.org/cgi-bin/carddisp.pl?gene=SELP</a>         |
| RPS27A   | Ribosomal Protein S27a                                                                                                     | Protein Coding | 48 | GC02P055231 | 4.981519699 | <a href="https://www.genecards.org/cgi-bin/carddisp.pl?gene=RPS27A">https://www.genecards.org/cgi-bin/carddisp.pl?gene=RPS27A</a>     |
| GAST     | Gastrin                                                                                                                    | Protein Coding | 46 | GC17P041712 | 4.976635933 | <a href="https://www.genecards.org/cgi-bin/carddisp.pl?gene=GAST">https://www.genecards.org/cgi-bin/carddisp.pl?gene=GAST</a>         |
| TNFRSF1A | TNF Receptor Superfamily Member 1A                                                                                         | Protein Coding | 57 | GC12M006328 | 4.969126225 | <a href="https://www.genecards.org/cgi-bin/carddisp.pl?gene=TNFRSF1A">https://www.genecards.org/cgi-bin/carddisp.pl?gene=TNFRSF1A</a> |

|   |         |                                                       |                |    |             |             |                                                                                                                                       |
|---|---------|-------------------------------------------------------|----------------|----|-------------|-------------|---------------------------------------------------------------------------------------------------------------------------------------|
| 1 | HLA-DQB | Major Histocompatibility Complex, Class II, DQ Beta 1 | Protein Coding | 48 | GC06M071781 | 4.959109306 | <a href="https://www.genecards.org/cgi-bin/carddisp.pl?gene=HLA-DQB1">https://www.genecards.org/cgi-bin/carddisp.pl?gene=HLA-DQB1</a> |
|   | COASY   | Coenzyme A Synthase                                   | Protein Coding | 52 | GC17P042561 | 4.956408024 | <a href="https://www.genecards.org/cgi-bin/carddisp.pl?gene=COASY">https://www.genecards.org/cgi-bin/carddisp.pl?gene=COASY</a>       |
|   | MYD88   | MYD88 Innate Immune Signal Transduction Adaptor       | Protein Coding | 56 | GC03P038152 | 4.956139088 | <a href="https://www.genecards.org/cgi-bin/carddisp.pl?gene=MYD88">https://www.genecards.org/cgi-bin/carddisp.pl?gene=MYD88</a>       |
|   | CTSG    | Cathepsin G                                           | Protein Coding | 52 | GC14M024573 | 4.955893993 | <a href="https://www.genecards.org/cgi-bin/carddisp.pl?gene=CTSG">https://www.genecards.org/cgi-bin/carddisp.pl?gene=CTSG</a>         |
|   | PRKACA  | Protein Kinase CAMP-Activated Catalytic Subunit Alpha | Protein Coding | 59 | GC19M014672 | 4.948847294 | <a href="https://www.genecards.org/cgi-bin/carddisp.pl?gene=PRKACA">https://www.genecards.org/cgi-bin/carddisp.pl?gene=PRKACA</a>     |
|   | KDR     | Kinase Insert Domain Receptor                         | Protein Coding | 60 | GC04M055078 | 4.945917606 | <a href="https://www.genecards.org/cgi-bin/carddisp.pl?gene=KDR">https://www.genecards.org/cgi-bin/carddisp.pl?gene=KDR</a>           |
|   | DGAT2   | Diacylglycerol O-Acyltransferase 2                    | Protein Coding | 49 | GC11P075759 | 4.939157963 | <a href="https://www.genecards.org/cgi-bin/carddisp.pl?gene=DGAT2">https://www.genecards.org/cgi-bin/carddisp.pl?gene=DGAT2</a>       |
|   | HDAC1   | Histone Deacetylase 1                                 | Protein Coding | 57 | GC01P032292 | 4.924383163 | <a href="https://www.genecards.org/cgi-bin/carddisp.pl?gene=HDAC1">https://www.genecards.org/cgi-bin/carddisp.pl?gene=HDAC1</a>       |
|   | BTK     | Bruton Tyrosine Kinase                                | Protein Coding | 60 | GC0XM101349 | 4.922725201 | <a href="https://www.genecards.org/cgi-bin/carddisp.pl?gene=BTK">https://www.genecards.org/cgi-bin/carddisp.pl?gene=BTK</a>           |
|   | VIM     | Vimentin                                              | Protein Coding | 57 | GC10P017227 | 4.918421745 | <a href="https://www.genecards.org/cgi-bin/carddisp.pl?gene=VIM">https://www.genecards.org/cgi-bin/carddisp.pl?gene=VIM</a>           |
|   | CHEK2   | Checkpoint Kinase 2                                   | Protein Coding | 61 | GC22M028687 | 4.904974937 | <a href="https://www.genecards.org/cgi-bin/carddisp.pl?gene=CHEK2">https://www.genecards.org/cgi-bin/carddisp.pl?gene=CHEK2</a>       |
|   | CALR    | Calreticulin                                          | Protein Coding | 58 | GC19P012938 | 4.903204918 | <a href="https://www.genecards.org/cgi-bin/carddisp.pl?gene=CALR">https://www.genecards.org/cgi-bin/carddisp.pl?gene=CALR</a>         |
|   | HMGCS1  | 3-Hydroxy-3-Methylglutaryl-CoA Synthase 1             | Protein Coding | 48 | GC05M044196 | 4.901966095 | <a href="https://www.genecards.org/cgi-bin/carddisp.pl?gene=HMGCS1">https://www.genecards.org/cgi-bin/carddisp.pl?gene=HMGCS1</a>     |
|   | GAD2    | Glutamate Decarboxylase 2                             | Protein Coding | 51 | GC10P026216 | 4.901376247 | <a href="https://www.genecards.org/cgi-bin/carddisp.pl?gene=GAD2">https://www.genecards.org/cgi-bin/carddisp.pl?gene=GAD2</a>         |
|   | CYB5R3  | Cytochrome B5 Reductase 3                             | Protein Coding | 52 | GC22M061501 | 4.898460865 | <a href="https://www.genecards.org/cgi-bin/carddisp.pl?gene=CYB5R3">https://www.genecards.org/cgi-bin/carddisp.pl?gene=CYB5R3</a>     |



|         |                                                           |                |    |             |             |                                                                                                                                     |
|---------|-----------------------------------------------------------|----------------|----|-------------|-------------|-------------------------------------------------------------------------------------------------------------------------------------|
| ALAS1   | 5'-Aminolevulinate Synthase 1                             | Protein Coding | 50 | GC03P052198 | 4.893675804 | <a href="https://www.genecards.org/cgi-bin/carddisp.pl?gene=ALAS1">https://www.genecards.org/cgi-bin/carddisp.pl?gene=ALAS1</a>     |
| BAX     | BCL2 Associated X, Apoptosis Regulator                    | Protein Coding | 57 | GC19P048954 | 4.886703491 | <a href="https://www.genecards.org/cgi-bin/carddisp.pl?gene=BAX">https://www.genecards.org/cgi-bin/carddisp.pl?gene=BAX</a>         |
| ACOT4   | Acyl-CoA Thioesterase 4                                   | Protein Coding | 42 | GC14P073592 | 4.880039692 | <a href="https://www.genecards.org/cgi-bin/carddisp.pl?gene=ACOT4">https://www.genecards.org/cgi-bin/carddisp.pl?gene=ACOT4</a>     |
| SPR     | Sepiapterin Reductase                                     | Protein Coding | 56 | GC02P072850 | 4.879478931 | <a href="https://www.genecards.org/cgi-bin/carddisp.pl?gene=SPR">https://www.genecards.org/cgi-bin/carddisp.pl?gene=SPR</a>         |
| VHL     | Von Hippel-Lindau Tumor Suppressor                        | Protein Coding | 54 | GC03P013681 | 4.872748375 | <a href="https://www.genecards.org/cgi-bin/carddisp.pl?gene=VHL">https://www.genecards.org/cgi-bin/carddisp.pl?gene=VHL</a>         |
| SETD2   | SET Domain Containing 2, Histone Lysine Methyltransferase | Protein Coding | 53 | GC03M047033 | 4.872437    | <a href="https://www.genecards.org/cgi-bin/carddisp.pl?gene=SETD2">https://www.genecards.org/cgi-bin/carddisp.pl?gene=SETD2</a>     |
| HBA2    | Hemoglobin Subunit Alpha 2                                | Protein Coding | 48 | GC16P013429 | 4.87237978  | <a href="https://www.genecards.org/cgi-bin/carddisp.pl?gene=HBA2">https://www.genecards.org/cgi-bin/carddisp.pl?gene=HBA2</a>       |
| ACSL6   | Acyl-CoA Synthetase Long Chain Family Member 6            | Protein Coding | 47 | GC05M131949 | 4.870249748 | <a href="https://www.genecards.org/cgi-bin/carddisp.pl?gene=ACSL6">https://www.genecards.org/cgi-bin/carddisp.pl?gene=ACSL6</a>     |
| IDE     | Insulin Degrading Enzyme                                  | Protein Coding | 55 | GC10M092451 | 4.864925861 | <a href="https://www.genecards.org/cgi-bin/carddisp.pl?gene=IDE">https://www.genecards.org/cgi-bin/carddisp.pl?gene=IDE</a>         |
| HSPA5   | Heat Shock Protein Family A (Hsp70) Member 5              | Protein Coding | 55 | GC09M125234 | 4.862672329 | <a href="https://www.genecards.org/cgi-bin/carddisp.pl?gene=HSPA5">https://www.genecards.org/cgi-bin/carddisp.pl?gene=HSPA5</a>     |
| ALDH3B2 | Aldehyde Dehydrogenase 3 Family Member B2                 | Protein Coding | 45 | GC11M067662 | 4.860623837 | <a href="https://www.genecards.org/cgi-bin/carddisp.pl?gene=ALDH3B2">https://www.genecards.org/cgi-bin/carddisp.pl?gene=ALDH3B2</a> |
| CLCN1   | Chloride Voltage-Gated Channel 1                          | Protein Coding | 50 | GC07P143316 | 4.854913712 | <a href="https://www.genecards.org/cgi-bin/carddisp.pl?gene=CLCN1">https://www.genecards.org/cgi-bin/carddisp.pl?gene=CLCN1</a>     |
| NGFR    | Nerve Growth Factor Receptor                              | Protein Coding | 54 | GC17P049495 | 4.847626686 | <a href="https://www.genecards.org/cgi-bin/carddisp.pl?gene=NGFR">https://www.genecards.org/cgi-bin/carddisp.pl?gene=NGFR</a>       |
| KRT18   | Keratin 18                                                | Protein Coding | 56 | GC12P052948 | 4.843678474 | <a href="https://www.genecards.org/cgi-bin/carddisp.pl?gene=KRT18">https://www.genecards.org/cgi-bin/carddisp.pl?gene=KRT18</a>     |
| HBG2    | Hemoglobin Subunit Gamma 2                                | Protein Coding | 47 | GC11M006835 | 4.837977886 | <a href="https://www.genecards.org/cgi-bin/carddisp.pl?gene=HBG2">https://www.genecards.org/cgi-bin/carddisp.pl?gene=HBG2</a>       |

|         |                                                                        |                |    |             |             |                                                                                                                                     |
|---------|------------------------------------------------------------------------|----------------|----|-------------|-------------|-------------------------------------------------------------------------------------------------------------------------------------|
| PSPH    | Phosphoserine Phosphatase                                              | Protein Coding | 52 | GC07M061179 | 4.837378979 | <a href="https://www.genecards.org/cgi-bin/carddisp.pl?gene=PSPH">https://www.genecards.org/cgi-bin/carddisp.pl?gene=PSPH</a>       |
| GNPAT   | Glyceronephosphate O-Acyltransferase                                   | Protein Coding | 51 | GC01P231241 | 4.835204601 | <a href="https://www.genecards.org/cgi-bin/carddisp.pl?gene=GNPAT">https://www.genecards.org/cgi-bin/carddisp.pl?gene=GNPAT</a>     |
| BACE1   | Beta-Secretase 1                                                       | Protein Coding | 53 | GC11M117285 | 4.827996254 | <a href="https://www.genecards.org/cgi-bin/carddisp.pl?gene=BACE1">https://www.genecards.org/cgi-bin/carddisp.pl?gene=BACE1</a>     |
| IGHE    | Immunoglobulin Heavy Constant Epsilon                                  | Protein Coding | 36 | GC14M113319 | 4.824530125 | <a href="https://www.genecards.org/cgi-bin/carddisp.pl?gene=IGHE">https://www.genecards.org/cgi-bin/carddisp.pl?gene=IGHE</a>       |
| CASK    | Calcium/Calmodulin Dependent Serine Protein Kinase                     | Protein Coding | 56 | GC0XM041514 | 4.822626591 | <a href="https://www.genecards.org/cgi-bin/carddisp.pl?gene=CASK">https://www.genecards.org/cgi-bin/carddisp.pl?gene=CASK</a>       |
| DLST    | Dihydrolipoamide S-Succinyltransferase                                 | Protein Coding | 52 | GC14P074881 | 4.821403027 | <a href="https://www.genecards.org/cgi-bin/carddisp.pl?gene=DLST">https://www.genecards.org/cgi-bin/carddisp.pl?gene=DLST</a>       |
| FLG     | Filaggrin                                                              | Protein Coding | 47 | GC01M152828 | 4.818543434 | <a href="https://www.genecards.org/cgi-bin/carddisp.pl?gene=FLG">https://www.genecards.org/cgi-bin/carddisp.pl?gene=FLG</a>         |
| HYOU1   | Hypoxia Up-Regulated 1                                                 | Protein Coding | 52 | GC11M119272 | 4.812234402 | <a href="https://www.genecards.org/cgi-bin/carddisp.pl?gene=HYOU1">https://www.genecards.org/cgi-bin/carddisp.pl?gene=HYOU1</a>     |
| CDKL5   | Cyclin Dependent Kinase Like 5                                         | Protein Coding | 50 | GC0XP018425 | 4.80866766  | <a href="https://www.genecards.org/cgi-bin/carddisp.pl?gene=CDKL5">https://www.genecards.org/cgi-bin/carddisp.pl?gene=CDKL5</a>     |
| AOC1    | Amine Oxidase Copper Containing 1                                      | Protein Coding | 49 | GC07P150824 | 4.807901382 | <a href="https://www.genecards.org/cgi-bin/carddisp.pl?gene=AOC1">https://www.genecards.org/cgi-bin/carddisp.pl?gene=AOC1</a>       |
| GRIN1   | Glutamate Ionotropic Receptor NMDA Type Subunit 1                      | Protein Coding | 57 | GC09P137184 | 4.80106926  | <a href="https://www.genecards.org/cgi-bin/carddisp.pl?gene=GRIN1">https://www.genecards.org/cgi-bin/carddisp.pl?gene=GRIN1</a>     |
| FUT2    | Fucosyltransferase 2                                                   | Protein Coding | 52 | GC19P048695 | 4.799116611 | <a href="https://www.genecards.org/cgi-bin/carddisp.pl?gene=FUT2">https://www.genecards.org/cgi-bin/carddisp.pl?gene=FUT2</a>       |
| SLCO1B3 | Solute Carrier Organic Anion Transporter Family Member 1B3             | Protein Coding | 51 | GC12P020810 | 4.793128967 | <a href="https://www.genecards.org/cgi-bin/carddisp.pl?gene=SLCO1B3">https://www.genecards.org/cgi-bin/carddisp.pl?gene=SLCO1B3</a> |
| TACR1   | Tachykinin Receptor 1                                                  | Protein Coding | 51 | GC02M075203 | 4.782237053 | <a href="https://www.genecards.org/cgi-bin/carddisp.pl?gene=TACR1">https://www.genecards.org/cgi-bin/carddisp.pl?gene=TACR1</a>     |
| PIK3CD  | Phosphatidylinositol-4,5-Bisphosphate 3-Kinase Catalytic Subunit Delta | Protein Coding | 60 | GC01P009628 | 4.779503822 | <a href="https://www.genecards.org/cgi-bin/carddisp.pl?gene=PIK3CD">https://www.genecards.org/cgi-bin/carddisp.pl?gene=PIK3CD</a>   |

|         |                                                      |                |    |             |             |                                                                                                                                     |
|---------|------------------------------------------------------|----------------|----|-------------|-------------|-------------------------------------------------------------------------------------------------------------------------------------|
| AIRE    | Autoimmune Regulator                                 | Protein Coding | 50 | GC21P044285 | 4.776328087 | <a href="https://www.genecards.org/cgi-bin/carddisp.pl?gene=AIRE">https://www.genecards.org/cgi-bin/carddisp.pl?gene=AIRE</a>       |
| ACSM2B  | Acyl-CoA Synthetase Medium Chain Family Member 2B    | Protein Coding | 40 | GC16M020547 | 4.77520895  | <a href="https://www.genecards.org/cgi-bin/carddisp.pl?gene=ACSM2B">https://www.genecards.org/cgi-bin/carddisp.pl?gene=ACSM2B</a>   |
| ATOX1   | Antioxidant 1 Copper Chaperone                       | Protein Coding | 46 | GC05M151743 | 4.772132397 | <a href="https://www.genecards.org/cgi-bin/carddisp.pl?gene=ATOX1">https://www.genecards.org/cgi-bin/carddisp.pl?gene=ATOX1</a>     |
| LCN2    | Lipocalin 2                                          | Protein Coding | 52 | GC09P128149 | 4.771922112 | <a href="https://www.genecards.org/cgi-bin/carddisp.pl?gene=LCN2">https://www.genecards.org/cgi-bin/carddisp.pl?gene=LCN2</a>       |
| HSD17B2 | Hydroxysteroid 17-Beta Dehydrogenase 2               | Protein Coding | 50 | GC16P082068 | 4.765637875 | <a href="https://www.genecards.org/cgi-bin/carddisp.pl?gene=HSD17B2">https://www.genecards.org/cgi-bin/carddisp.pl?gene=HSD17B2</a> |
| ACP1    | Acid Phosphatase 1                                   | Protein Coding | 50 | GC02P000402 | 4.764500618 | <a href="https://www.genecards.org/cgi-bin/carddisp.pl?gene=ACP1">https://www.genecards.org/cgi-bin/carddisp.pl?gene=ACP1</a>       |
| HSD17B7 | Hydroxysteroid 17-Beta Dehydrogenase 7               | Protein Coding | 50 | GC01P162790 | 4.741034031 | <a href="https://www.genecards.org/cgi-bin/carddisp.pl?gene=HSD17B7">https://www.genecards.org/cgi-bin/carddisp.pl?gene=HSD17B7</a> |
| CDK1    | Cyclin Dependent Kinase 1                            | Protein Coding | 54 | GC10P060772 | 4.737948895 | <a href="https://www.genecards.org/cgi-bin/carddisp.pl?gene=CDK1">https://www.genecards.org/cgi-bin/carddisp.pl?gene=CDK1</a>       |
| ANGPT2  | Angiopoietin 2                                       | Protein Coding | 55 | GC08M006499 | 4.737078667 | <a href="https://www.genecards.org/cgi-bin/carddisp.pl?gene=ANGPT2">https://www.genecards.org/cgi-bin/carddisp.pl?gene=ANGPT2</a>   |
| HSPB1   | Heat Shock Protein Family B (Small) Member 1         | Protein Coding | 59 | GC07P076302 | 4.732555866 | <a href="https://www.genecards.org/cgi-bin/carddisp.pl?gene=HSPB1">https://www.genecards.org/cgi-bin/carddisp.pl?gene=HSPB1</a>     |
| SAT1    | Spermidine/Spermine N1-Acetyltransferase 1           | Protein Coding | 51 | GC0XP023784 | 4.724458218 | <a href="https://www.genecards.org/cgi-bin/carddisp.pl?gene=SAT1">https://www.genecards.org/cgi-bin/carddisp.pl?gene=SAT1</a>       |
| HSPA8   | Heat Shock Protein Family A (Hsp70) Member 8         | Protein Coding | 56 | GC11M123057 | 4.723155022 | <a href="https://www.genecards.org/cgi-bin/carddisp.pl?gene=HSPA8">https://www.genecards.org/cgi-bin/carddisp.pl?gene=HSPA8</a>     |
| TXNRD2  | Thioredoxin Reductase 2                              | Protein Coding | 51 | GC22M019863 | 4.720499992 | <a href="https://www.genecards.org/cgi-bin/carddisp.pl?gene=TXNRD2">https://www.genecards.org/cgi-bin/carddisp.pl?gene=TXNRD2</a>   |
| KCNQ1   | Potassium Voltage-Gated Channel Subfamily Q Member 1 | Protein Coding | 57 | GC11P002444 | 4.712696552 | <a href="https://www.genecards.org/cgi-bin/carddisp.pl?gene=KCNQ1">https://www.genecards.org/cgi-bin/carddisp.pl?gene=KCNQ1</a>     |
| HDC     | Histidine Decarboxylase                              | Protein Coding | 51 | GC15M050241 | 4.712660789 | <a href="https://www.genecards.org/cgi-bin/carddisp.pl?gene=HDC">https://www.genecards.org/cgi-bin/carddisp.pl?gene=HDC</a>         |

|         |                                                            |                |    |             |             |                                                                                                                                     |
|---------|------------------------------------------------------------|----------------|----|-------------|-------------|-------------------------------------------------------------------------------------------------------------------------------------|
| GRIN2B  | Glutamate Ionotropic Receptor NMDA Type Subunit 2B         | Protein Coding | 59 | GC12M013437 | 4.70554781  | <a href="https://www.genecards.org/cgi-bin/carddisp.pl?gene=GRIN2B">https://www.genecards.org/cgi-bin/carddisp.pl?gene=GRIN2B</a>   |
| ACE2    | Angiotensin Converting Enzyme 2                            | Protein Coding | 56 | GC0XM015494 | 4.698474884 | <a href="https://www.genecards.org/cgi-bin/carddisp.pl?gene=ACE2">https://www.genecards.org/cgi-bin/carddisp.pl?gene=ACE2</a>       |
| RAF1    | Raf-1 Proto-Oncogene, Serine/Threonine Kinase              | Protein Coding | 61 | GC03M012583 | 4.69260931  | <a href="https://www.genecards.org/cgi-bin/carddisp.pl?gene=RAF1">https://www.genecards.org/cgi-bin/carddisp.pl?gene=RAF1</a>       |
| NTRK2   | Neurotrophic Receptor Tyrosine Kinase 2                    | Protein Coding | 60 | GC09P084668 | 4.689634323 | <a href="https://www.genecards.org/cgi-bin/carddisp.pl?gene=NTRK2">https://www.genecards.org/cgi-bin/carddisp.pl?gene=NTRK2</a>     |
| TIMM8A  | Translocase Of Inner Mitochondrial Membrane 8A             | Protein Coding | 48 | GC0XM101345 | 4.683206081 | <a href="https://www.genecards.org/cgi-bin/carddisp.pl?gene=TIMM8A">https://www.genecards.org/cgi-bin/carddisp.pl?gene=TIMM8A</a>   |
| DNAH8   | Dynein Axonemal Heavy Chain 8                              | Protein Coding | 44 | GC06P092313 | 4.681497574 | <a href="https://www.genecards.org/cgi-bin/carddisp.pl?gene=DNAH8">https://www.genecards.org/cgi-bin/carddisp.pl?gene=DNAH8</a>     |
| CROT    | Carnitine O-Octanoyltransferase                            | Protein Coding | 46 | GC07P087369 | 4.68108654  | <a href="https://www.genecards.org/cgi-bin/carddisp.pl?gene=CROT">https://www.genecards.org/cgi-bin/carddisp.pl?gene=CROT</a>       |
| YAP1    | Yes1 Associated Transcriptional Regulator                  | Protein Coding | 55 | GC11P102110 | 4.661038876 | <a href="https://www.genecards.org/cgi-bin/carddisp.pl?gene=YAP1">https://www.genecards.org/cgi-bin/carddisp.pl?gene=YAP1</a>       |
| LPCAT1  | Lysophosphatidylcholine Acyltransferase 1                  | Protein Coding | 42 | GC05M001456 | 4.657835007 | <a href="https://www.genecards.org/cgi-bin/carddisp.pl?gene=LPCAT1">https://www.genecards.org/cgi-bin/carddisp.pl?gene=LPCAT1</a>   |
| IL7     | Interleukin 7                                              | Protein Coding | 50 | GC08M078689 | 4.655595779 | <a href="https://www.genecards.org/cgi-bin/carddisp.pl?gene=IL7">https://www.genecards.org/cgi-bin/carddisp.pl?gene=IL7</a>         |
| ANGPT1  | Angiopoietin 1                                             | Protein Coding | 53 | GC08M107246 | 4.639920712 | <a href="https://www.genecards.org/cgi-bin/carddisp.pl?gene=ANGPT1">https://www.genecards.org/cgi-bin/carddisp.pl?gene=ANGPT1</a>   |
| SFTPD   | Surfactant Protein D                                       | Protein Coding | 51 | GC10M079937 | 4.638412476 | <a href="https://www.genecards.org/cgi-bin/carddisp.pl?gene=SFTPD">https://www.genecards.org/cgi-bin/carddisp.pl?gene=SFTPD</a>     |
| SLCO1A2 | Solute Carrier Organic Anion Transporter Family Member 1A2 | Protein Coding | 44 | GC12M021264 | 4.631290436 | <a href="https://www.genecards.org/cgi-bin/carddisp.pl?gene=SLCO1A2">https://www.genecards.org/cgi-bin/carddisp.pl?gene=SLCO1A2</a> |
| ELOVL2  | ELOVL Fatty Acid Elongase 2                                | Protein Coding | 45 | GC06M010980 | 4.627637386 | <a href="https://www.genecards.org/cgi-bin/carddisp.pl?gene=ELOVL2">https://www.genecards.org/cgi-bin/carddisp.pl?gene=ELOVL2</a>   |
| HSPA4   | Heat Shock Protein Family A (Hsp70) Member 4               | Protein Coding | 49 | GC05P133054 | 4.618183136 | <a href="https://www.genecards.org/cgi-bin/carddisp.pl?gene=HSPA4">https://www.genecards.org/cgi-bin/carddisp.pl?gene=HSPA4</a>     |

|         |                                                      |                |    |             |             |                                                                                                                                     |
|---------|------------------------------------------------------|----------------|----|-------------|-------------|-------------------------------------------------------------------------------------------------------------------------------------|
| CSNK2A1 | Casein Kinase 2 Alpha 1                              | Protein Coding | 57 | GC20M000472 | 4.617533207 | <a href="https://www.genecards.org/cgi-bin/carddisp.pl?gene=CSNK2A1">https://www.genecards.org/cgi-bin/carddisp.pl?gene=CSNK2A1</a> |
| SLC4A4  | Solute Carrier Family 4 Member 4                     | Protein Coding | 53 | GC04P071063 | 4.614068985 | <a href="https://www.genecards.org/cgi-bin/carddisp.pl?gene=SLC4A4">https://www.genecards.org/cgi-bin/carddisp.pl?gene=SLC4A4</a>   |
| CNDP1   | Carnosine Dipeptidase 1                              | Protein Coding | 50 | GC18P074534 | 4.612370491 | <a href="https://www.genecards.org/cgi-bin/carddisp.pl?gene=CNDP1">https://www.genecards.org/cgi-bin/carddisp.pl?gene=CNDP1</a>     |
| LTA4H   | Leukotriene A4 Hydrolase                             | Protein Coding | 53 | GC12M096000 | 4.609683037 | <a href="https://www.genecards.org/cgi-bin/carddisp.pl?gene=LTA4H">https://www.genecards.org/cgi-bin/carddisp.pl?gene=LTA4H</a>     |
| CHGA    | Chromogranin A                                       | Protein Coding | 50 | GC14P092950 | 4.607313633 | <a href="https://www.genecards.org/cgi-bin/carddisp.pl?gene=CHGA">https://www.genecards.org/cgi-bin/carddisp.pl?gene=CHGA</a>       |
| KCNH2   | Potassium Voltage-Gated Channel Subfamily H Member 2 | Protein Coding | 57 | GC07M150944 | 4.600515842 | <a href="https://www.genecards.org/cgi-bin/carddisp.pl?gene=KCNH2">https://www.genecards.org/cgi-bin/carddisp.pl?gene=KCNH2</a>     |
| CYBA    | Cytochrome B-245 Alpha Chain                         | Protein Coding | 54 | GC16M088643 | 4.597821712 | <a href="https://www.genecards.org/cgi-bin/carddisp.pl?gene=CYBA">https://www.genecards.org/cgi-bin/carddisp.pl?gene=CYBA</a>       |
| ACSM2A  | Acyl-CoA Synthetase Medium Chain Family Member 2A    | Protein Coding | 39 | GC16P020463 | 4.596745014 | <a href="https://www.genecards.org/cgi-bin/carddisp.pl?gene=ACSM2A">https://www.genecards.org/cgi-bin/carddisp.pl?gene=ACSM2A</a>   |
| PTGES   | Prostaglandin E Synthase                             | Protein Coding | 48 | GC09M129738 | 4.596619606 | <a href="https://www.genecards.org/cgi-bin/carddisp.pl?gene=PTGES">https://www.genecards.org/cgi-bin/carddisp.pl?gene=PTGES</a>     |
| TFAP2A  | Transcription Factor AP-2 Alpha                      | Protein Coding | 53 | GC06M010393 | 4.594346046 | <a href="https://www.genecards.org/cgi-bin/carddisp.pl?gene=TFAP2A">https://www.genecards.org/cgi-bin/carddisp.pl?gene=TFAP2A</a>   |
| SLC6A14 | Solute Carrier Family 6 Member 14                    | Protein Coding | 48 | GC0XP116436 | 4.591845036 | <a href="https://www.genecards.org/cgi-bin/carddisp.pl?gene=SLC6A14">https://www.genecards.org/cgi-bin/carddisp.pl?gene=SLC6A14</a> |
| HTR2C   | 5-Hydroxytryptamine Receptor 2C                      | Protein Coding | 52 | GC0XP114584 | 4.588009834 | <a href="https://www.genecards.org/cgi-bin/carddisp.pl?gene=HTR2C">https://www.genecards.org/cgi-bin/carddisp.pl?gene=HTR2C</a>     |
| PRMT1   | Protein Arginine Methyltransferase 1                 | Protein Coding | 55 | GC19P049675 | 4.583292007 | <a href="https://www.genecards.org/cgi-bin/carddisp.pl?gene=PRMT1">https://www.genecards.org/cgi-bin/carddisp.pl?gene=PRMT1</a>     |
| CAMK2G  | Calcium/Calmodulin Dependent Protein Kinase II Gamma | Protein Coding | 54 | GC10M073812 | 4.57988739  | <a href="https://www.genecards.org/cgi-bin/carddisp.pl?gene=CAMK2G">https://www.genecards.org/cgi-bin/carddisp.pl?gene=CAMK2G</a>   |
| HSPD1   | Heat Shock Protein Family D (Hsp60) Member 1         | Protein Coding | 55 | GC02M197486 | 4.576894283 | <a href="https://www.genecards.org/cgi-bin/carddisp.pl?gene=HSPD1">https://www.genecards.org/cgi-bin/carddisp.pl?gene=HSPD1</a>     |

|         |                                                      |                |    |             |             |                                                                                                                                     |
|---------|------------------------------------------------------|----------------|----|-------------|-------------|-------------------------------------------------------------------------------------------------------------------------------------|
| SLC7A11 | Solute Carrier Family 7 Member 11                    | Protein Coding | 51 | GC04M138164 | 4.569381237 | <a href="https://www.genecards.org/cgi-bin/carddisp.pl?gene=SLC7A11">https://www.genecards.org/cgi-bin/carddisp.pl?gene=SLC7A11</a> |
| NCOA1   | Nuclear Receptor Coactivator 1                       | Protein Coding | 51 | GC02P024492 | 4.565952778 | <a href="https://www.genecards.org/cgi-bin/carddisp.pl?gene=NCOA1">https://www.genecards.org/cgi-bin/carddisp.pl?gene=NCOA1</a>     |
| SLC6A4  | Solute Carrier Family 6 Member 4                     | Protein Coding | 55 | GC17M030194 | 4.565765858 | <a href="https://www.genecards.org/cgi-bin/carddisp.pl?gene=SLC6A4">https://www.genecards.org/cgi-bin/carddisp.pl?gene=SLC6A4</a>   |
| SMN1    | Survival Of Motor Neuron 1, Telomeric                | Protein Coding | 47 | GC05P070924 | 4.564593792 | <a href="https://www.genecards.org/cgi-bin/carddisp.pl?gene=SMN1">https://www.genecards.org/cgi-bin/carddisp.pl?gene=SMN1</a>       |
| TLR2    | Toll Like Receptor 2                                 | Protein Coding | 59 | GC04P153684 | 4.562651634 | <a href="https://www.genecards.org/cgi-bin/carddisp.pl?gene=TLR2">https://www.genecards.org/cgi-bin/carddisp.pl?gene=TLR2</a>       |
| P2RX7   | Purinergic Receptor P2X 7                            | Protein Coding | 54 | GC12P126979 | 4.556344986 | <a href="https://www.genecards.org/cgi-bin/carddisp.pl?gene=P2RX7">https://www.genecards.org/cgi-bin/carddisp.pl?gene=P2RX7</a>     |
| RHOA    | Ras Homolog Family Member A                          | Protein Coding | 57 | GC03M049359 | 4.555493832 | <a href="https://www.genecards.org/cgi-bin/carddisp.pl?gene=RHOA">https://www.genecards.org/cgi-bin/carddisp.pl?gene=RHOA</a>       |
| MLH1    | MutL Homolog 1                                       | Protein Coding | 55 | GC03P036993 | 4.549809933 | <a href="https://www.genecards.org/cgi-bin/carddisp.pl?gene=MLH1">https://www.genecards.org/cgi-bin/carddisp.pl?gene=MLH1</a>       |
| ADRB1   | Adrenoceptor Beta 1                                  | Protein Coding | 54 | GC10P114044 | 4.549460411 | <a href="https://www.genecards.org/cgi-bin/carddisp.pl?gene=ADRB1">https://www.genecards.org/cgi-bin/carddisp.pl?gene=ADRB1</a>     |
| TIMP2   | TIMP Metallopeptidase Inhibitor 2                    | Protein Coding | 48 | GC17M078852 | 4.54147768  | <a href="https://www.genecards.org/cgi-bin/carddisp.pl?gene=TIMP2">https://www.genecards.org/cgi-bin/carddisp.pl?gene=TIMP2</a>     |
| DBI     | Diazepam Binding Inhibitor, Acyl-CoA Binding Protein | Protein Coding | 51 | GC02P119366 | 4.539021969 | <a href="https://www.genecards.org/cgi-bin/carddisp.pl?gene=DBI">https://www.genecards.org/cgi-bin/carddisp.pl?gene=DBI</a>         |
| CDH1    | Cadherin 1                                           | Protein Coding | 56 | GC16P068737 | 4.532455921 | <a href="https://www.genecards.org/cgi-bin/carddisp.pl?gene=CDH1">https://www.genecards.org/cgi-bin/carddisp.pl?gene=CDH1</a>       |
| CDKN2B  | Cyclin Dependent Kinase Inhibitor 2B                 | Protein Coding | 53 | GC09M022002 | 4.53066206  | <a href="https://www.genecards.org/cgi-bin/carddisp.pl?gene=CDKN2B">https://www.genecards.org/cgi-bin/carddisp.pl?gene=CDKN2B</a>   |
| PLCD1   | Phospholipase C Delta 1                              | Protein Coding | 55 | GC03M038008 | 4.52986908  | <a href="https://www.genecards.org/cgi-bin/carddisp.pl?gene=PLCD1">https://www.genecards.org/cgi-bin/carddisp.pl?gene=PLCD1</a>     |
| CYSLTR1 | Cysteinyl Leukotriene Receptor 1                     | Protein Coding | 50 | GC0XM078271 | 4.527486801 | <a href="https://www.genecards.org/cgi-bin/carddisp.pl?gene=CYSLTR1">https://www.genecards.org/cgi-bin/carddisp.pl?gene=CYSLTR1</a> |

|        |                                                       |                |    |             |             |                                                                                                                                   |
|--------|-------------------------------------------------------|----------------|----|-------------|-------------|-----------------------------------------------------------------------------------------------------------------------------------|
| SPTLC2 | Serine Palmitoyltransferase Long Chain Base Subunit 2 | Protein Coding | 54 | GC14M077505 | 4.527154922 | <a href="https://www.genecards.org/cgi-bin/carddisp.pl?gene=SPTLC2">https://www.genecards.org/cgi-bin/carddisp.pl?gene=SPTLC2</a> |
| ARAF   | A-Raf Proto-Oncogene, Serine/Threonine Kinase         | Protein Coding | 53 | GC0XP047710 | 4.521902084 | <a href="https://www.genecards.org/cgi-bin/carddisp.pl?gene=ARAF">https://www.genecards.org/cgi-bin/carddisp.pl?gene=ARAF</a>     |
| DGKQ   | Diacylglycerol Kinase Theta                           | Protein Coding | 48 | GC04M000958 | 4.516810894 | <a href="https://www.genecards.org/cgi-bin/carddisp.pl?gene=DGKQ">https://www.genecards.org/cgi-bin/carddisp.pl?gene=DGKQ</a>     |
| ACAA1  | Acetyl-CoA Acyltransferase 1                          | Protein Coding | 48 | GC03M038103 | 4.513883114 | <a href="https://www.genecards.org/cgi-bin/carddisp.pl?gene=ACAA1">https://www.genecards.org/cgi-bin/carddisp.pl?gene=ACAA1</a>   |
| BLVRA  | Biliverdin Reductase A                                | Protein Coding | 51 | GC07P043758 | 4.509799004 | <a href="https://www.genecards.org/cgi-bin/carddisp.pl?gene=BLVRA">https://www.genecards.org/cgi-bin/carddisp.pl?gene=BLVRA</a>   |
| RPA1   | Replication Protein A1                                | Protein Coding | 53 | GC17P001829 | 4.499402523 | <a href="https://www.genecards.org/cgi-bin/carddisp.pl?gene=RPA1">https://www.genecards.org/cgi-bin/carddisp.pl?gene=RPA1</a>     |
| CDKN1A | Cyclin Dependent Kinase Inhibitor 1A                  | Protein Coding | 55 | GC06P092294 | 4.492255211 | <a href="https://www.genecards.org/cgi-bin/carddisp.pl?gene=CDKN1A">https://www.genecards.org/cgi-bin/carddisp.pl?gene=CDKN1A</a> |
| LTF    | Lactotransferrin                                      | Protein Coding | 52 | GC03M046435 | 4.481446266 | <a href="https://www.genecards.org/cgi-bin/carddisp.pl?gene=LTF">https://www.genecards.org/cgi-bin/carddisp.pl?gene=LTF</a>       |
| SOCS3  | Suppressor Of Cytokine Signaling 3                    | Protein Coding | 50 | GC17M078356 | 4.479187489 | <a href="https://www.genecards.org/cgi-bin/carddisp.pl?gene=SOCS3">https://www.genecards.org/cgi-bin/carddisp.pl?gene=SOCS3</a>   |
| COL2A1 | Collagen Type II Alpha 1 Chain                        | Protein Coding | 56 | GC12M047972 | 4.477406502 | <a href="https://www.genecards.org/cgi-bin/carddisp.pl?gene=COL2A1">https://www.genecards.org/cgi-bin/carddisp.pl?gene=COL2A1</a> |
| WT1    | WT1 Transcription Factor                              | Protein Coding | 55 | GC11M032365 | 4.475149155 | <a href="https://www.genecards.org/cgi-bin/carddisp.pl?gene=WT1">https://www.genecards.org/cgi-bin/carddisp.pl?gene=WT1</a>       |
| LDHB   | Lactate Dehydrogenase B                               | Protein Coding | 53 | GC12M021635 | 4.47364521  | <a href="https://www.genecards.org/cgi-bin/carddisp.pl?gene=LDHB">https://www.genecards.org/cgi-bin/carddisp.pl?gene=LDHB</a>     |
| ACSBG1 | Acyl-CoA Synthetase Bubblegum Family Member 1         | Protein Coding | 48 | GC15M078167 | 4.471997738 | <a href="https://www.genecards.org/cgi-bin/carddisp.pl?gene=ACSBG1">https://www.genecards.org/cgi-bin/carddisp.pl?gene=ACSBG1</a> |
| SNAP25 | Synaptosome Associated Protein 25                     | Protein Coding | 55 | GC20P010193 | 4.466922283 | <a href="https://www.genecards.org/cgi-bin/carddisp.pl?gene=SNAP25">https://www.genecards.org/cgi-bin/carddisp.pl?gene=SNAP25</a> |
| NME1   | NME/NM23 Nucleoside Diphosphate Kinase 1              | Protein Coding | 51 | GC17P062974 | 4.462903023 | <a href="https://www.genecards.org/cgi-bin/carddisp.pl?gene=NME1">https://www.genecards.org/cgi-bin/carddisp.pl?gene=NME1</a>     |

|        |                                                               |                |    |             |             |                                                                                                                                   |
|--------|---------------------------------------------------------------|----------------|----|-------------|-------------|-----------------------------------------------------------------------------------------------------------------------------------|
| ADRA2A | Adrenoceptor Alpha 2A                                         | Protein Coding | 52 | GC10P111077 | 4.449795246 | <a href="https://www.genecards.org/cgi-bin/carddisp.pl?gene=ADRA2A">https://www.genecards.org/cgi-bin/carddisp.pl?gene=ADRA2A</a> |
| DYRK1A | Dual Specificity Tyrosine Phosphorylation Regulated Kinase 1A | Protein Coding | 57 | GC21P037365 | 4.449550152 | <a href="https://www.genecards.org/cgi-bin/carddisp.pl?gene=DYRK1A">https://www.genecards.org/cgi-bin/carddisp.pl?gene=DYRK1A</a> |
| FASLG  | Fas Ligand                                                    | Protein Coding | 55 | GC01P172628 | 4.443905354 | <a href="https://www.genecards.org/cgi-bin/carddisp.pl?gene=FASLG">https://www.genecards.org/cgi-bin/carddisp.pl?gene=FASLG</a>   |
| ACSL3  | Acyl-CoA Synthetase Long Chain Family Member 3                | Protein Coding | 49 | GC02P222860 | 4.439405918 | <a href="https://www.genecards.org/cgi-bin/carddisp.pl?gene=ACSL3">https://www.genecards.org/cgi-bin/carddisp.pl?gene=ACSL3</a>   |
| AGER   | Advanced Glycosylation End-Product Specific Receptor          | Protein Coding | 53 | GC06M032180 | 4.438507557 | <a href="https://www.genecards.org/cgi-bin/carddisp.pl?gene=AGER">https://www.genecards.org/cgi-bin/carddisp.pl?gene=AGER</a>     |
| CXCR4  | C-X-C Motif Chemokine Receptor 4                              | Protein Coding | 59 | GC02M136114 | 4.436937332 | <a href="https://www.genecards.org/cgi-bin/carddisp.pl?gene=CXCR4">https://www.genecards.org/cgi-bin/carddisp.pl?gene=CXCR4</a>   |
| CBL    | Cbl Proto-Oncogene                                            | Protein Coding | 59 | GC11P119206 | 4.430374146 | <a href="https://www.genecards.org/cgi-bin/carddisp.pl?gene=CBL">https://www.genecards.org/cgi-bin/carddisp.pl?gene=CBL</a>       |
| THBS1  | Thrombospondin 1                                              | Protein Coding | 52 | GC15P039581 | 4.425669193 | <a href="https://www.genecards.org/cgi-bin/carddisp.pl?gene=THBS1">https://www.genecards.org/cgi-bin/carddisp.pl?gene=THBS1</a>   |
| IFNA1  | Interferon Alpha 1                                            | Protein Coding | 45 | GC09P021611 | 4.422715187 | <a href="https://www.genecards.org/cgi-bin/carddisp.pl?gene=IFNA1">https://www.genecards.org/cgi-bin/carddisp.pl?gene=IFNA1</a>   |
| SRR    | Serine Racemase                                               | Protein Coding | 48 | GC17P002303 | 4.418429375 | <a href="https://www.genecards.org/cgi-bin/carddisp.pl?gene=SRR">https://www.genecards.org/cgi-bin/carddisp.pl?gene=SRR</a>       |
| ADPRH  | ADP-Ribosylarginine Hydrolase                                 | Protein Coding | 42 | GC03P119579 | 4.417760849 | <a href="https://www.genecards.org/cgi-bin/carddisp.pl?gene=ADPRH">https://www.genecards.org/cgi-bin/carddisp.pl?gene=ADPRH</a>   |
| CCN2   | Cellular Communication Network Factor 2                       | Protein Coding | 53 | GC06M131948 | 4.404472828 | <a href="https://www.genecards.org/cgi-bin/carddisp.pl?gene=CCN2">https://www.genecards.org/cgi-bin/carddisp.pl?gene=CCN2</a>     |
| TGFA   | Transforming Growth Factor Alpha                              | Protein Coding | 53 | GC02M070447 | 4.400311947 | <a href="https://www.genecards.org/cgi-bin/carddisp.pl?gene=TGFA">https://www.genecards.org/cgi-bin/carddisp.pl?gene=TGFA</a>     |
| PAX5   | Paired Box 5                                                  | Protein Coding | 52 | GC09M036879 | 4.399440765 | <a href="https://www.genecards.org/cgi-bin/carddisp.pl?gene=PAX5">https://www.genecards.org/cgi-bin/carddisp.pl?gene=PAX5</a>     |
| RUNX1  | RUNX Family Transcription Factor 1                            | Protein Coding | 56 | GC21M034787 | 4.396518707 | <a href="https://www.genecards.org/cgi-bin/carddisp.pl?gene=RUNX1">https://www.genecards.org/cgi-bin/carddisp.pl?gene=RUNX1</a>   |



|         |                                            |                |    |             |             |                                                                                                                                     |
|---------|--------------------------------------------|----------------|----|-------------|-------------|-------------------------------------------------------------------------------------------------------------------------------------|
| ENG     | Endoglin                                   | Protein Coding | 55 | GC09M127815 | 4.393945217 | <a href="https://www.genecards.org/cgi-bin/carddisp.pl?gene=ENG">https://www.genecards.org/cgi-bin/carddisp.pl?gene=ENG</a>         |
| PDGFB   | Platelet Derived Growth Factor Subunit B   | Protein Coding | 58 | GC22M062326 | 4.381302357 | <a href="https://www.genecards.org/cgi-bin/carddisp.pl?gene=PDGFB">https://www.genecards.org/cgi-bin/carddisp.pl?gene=PDGFB</a>     |
| EDNRA   | Endothelin Receptor Type A                 | Protein Coding | 56 | GC04P147480 | 4.378360271 | <a href="https://www.genecards.org/cgi-bin/carddisp.pl?gene=EDNRA">https://www.genecards.org/cgi-bin/carddisp.pl?gene=EDNRA</a>     |
| SLC27A2 | Solute Carrier Family 27 Member 2          | Protein Coding | 52 | GC15P050182 | 4.3697896   | <a href="https://www.genecards.org/cgi-bin/carddisp.pl?gene=SLC27A2">https://www.genecards.org/cgi-bin/carddisp.pl?gene=SLC27A2</a> |
| NCOA3   | Nuclear Receptor Coactivator 3             | Protein Coding | 54 | GC20P047501 | 4.368255615 | <a href="https://www.genecards.org/cgi-bin/carddisp.pl?gene=NCOA3">https://www.genecards.org/cgi-bin/carddisp.pl?gene=NCOA3</a>     |
| CDK2    | Cyclin Dependent Kinase 2                  | Protein Coding | 58 | GC12P055966 | 4.363362789 | <a href="https://www.genecards.org/cgi-bin/carddisp.pl?gene=CDK2">https://www.genecards.org/cgi-bin/carddisp.pl?gene=CDK2</a>       |
| GAL     | Galanin And GMAP Prepropeptide             | Protein Coding | 51 | GC11P071097 | 4.357871056 | <a href="https://www.genecards.org/cgi-bin/carddisp.pl?gene=GAL">https://www.genecards.org/cgi-bin/carddisp.pl?gene=GAL</a>         |
| PLCG2   | Phospholipase C Gamma 2                    | Protein Coding | 58 | GC16P081773 | 4.349803448 | <a href="https://www.genecards.org/cgi-bin/carddisp.pl?gene=PLCG2">https://www.genecards.org/cgi-bin/carddisp.pl?gene=PLCG2</a>     |
| LTA     | Lymphotoxin Alpha                          | Protein Coding | 49 | GC06P092152 | 4.348684311 | <a href="https://www.genecards.org/cgi-bin/carddisp.pl?gene=LTA">https://www.genecards.org/cgi-bin/carddisp.pl?gene=LTA</a>         |
| CLU     | Clusterin                                  | Protein Coding | 54 | GC08M027596 | 4.345746994 | <a href="https://www.genecards.org/cgi-bin/carddisp.pl?gene=CLU">https://www.genecards.org/cgi-bin/carddisp.pl?gene=CLU</a>         |
| MUC1    | Mucin 1, Cell Surface Associated           | Protein Coding | 55 | GC01M155185 | 4.336580753 | <a href="https://www.genecards.org/cgi-bin/carddisp.pl?gene=MUC1">https://www.genecards.org/cgi-bin/carddisp.pl?gene=MUC1</a>       |
| SMAD4   | SMAD Family Member 4                       | Protein Coding | 59 | GC18P051028 | 4.335887909 | <a href="https://www.genecards.org/cgi-bin/carddisp.pl?gene=SMAD4">https://www.genecards.org/cgi-bin/carddisp.pl?gene=SMAD4</a>     |
| FN1     | Fibronectin 1                              | Protein Coding | 57 | GC02M215360 | 4.331896305 | <a href="https://www.genecards.org/cgi-bin/carddisp.pl?gene=FN1">https://www.genecards.org/cgi-bin/carddisp.pl?gene=FN1</a>         |
| TGFBR1  | Transforming Growth Factor Beta Receptor 1 | Protein Coding | 61 | GC09P099104 | 4.330105305 | <a href="https://www.genecards.org/cgi-bin/carddisp.pl?gene=TGFBR1">https://www.genecards.org/cgi-bin/carddisp.pl?gene=TGFBR1</a>   |
| BSG     | Basigin (Ok Blood Group)                   | Protein Coding | 51 | GC19P000571 | 4.324801445 | <a href="https://www.genecards.org/cgi-bin/carddisp.pl?gene=BSG">https://www.genecards.org/cgi-bin/carddisp.pl?gene=BSG</a>         |

|          |                                                |                |    |             |             |                                                                                                                                       |
|----------|------------------------------------------------|----------------|----|-------------|-------------|---------------------------------------------------------------------------------------------------------------------------------------|
| RRM2     | Ribonucleotide Reductase Regulatory Subunit M2 | Protein Coding | 55 | GC02P010123 | 4.324131966 | <a href="https://www.genecards.org/cgi-bin/carddisp.pl?gene=RRM2">https://www.genecards.org/cgi-bin/carddisp.pl?gene=RRM2</a>         |
| PARK7    | Parkinsonism Associated Deglycase              | Protein Coding | 54 | GC01P008140 | 4.317549706 | <a href="https://www.genecards.org/cgi-bin/carddisp.pl?gene=PARK7">https://www.genecards.org/cgi-bin/carddisp.pl?gene=PARK7</a>       |
| TGFBR2   | Transforming Growth Factor Beta Receptor 2     | Protein Coding | 59 | GC03P030623 | 4.308754444 | <a href="https://www.genecards.org/cgi-bin/carddisp.pl?gene=TGFBR2">https://www.genecards.org/cgi-bin/carddisp.pl?gene=TGFBR2</a>     |
| HDAC2    | Histone Deacetylase 2                          | Protein Coding | 59 | GC06M113933 | 4.305524826 | <a href="https://www.genecards.org/cgi-bin/carddisp.pl?gene=HDAC2">https://www.genecards.org/cgi-bin/carddisp.pl?gene=HDAC2</a>       |
| PRNP     | Prion Protein                                  | Protein Coding | 55 | GC20P004686 | 4.301037312 | <a href="https://www.genecards.org/cgi-bin/carddisp.pl?gene=PRNP">https://www.genecards.org/cgi-bin/carddisp.pl?gene=PRNP</a>         |
| RRM1     | Ribonucleotide Reductase Catalytic Subunit M1  | Protein Coding | 56 | GC11P004115 | 4.299415112 | <a href="https://www.genecards.org/cgi-bin/carddisp.pl?gene=RRM1">https://www.genecards.org/cgi-bin/carddisp.pl?gene=RRM1</a>         |
| PRKCD    | Protein Kinase C Delta                         | Protein Coding | 59 | GC03P053156 | 4.297080994 | <a href="https://www.genecards.org/cgi-bin/carddisp.pl?gene=PRKCD">https://www.genecards.org/cgi-bin/carddisp.pl?gene=PRKCD</a>       |
| SLC26A4  | Solute Carrier Family 26 Member 4              | Protein Coding | 49 | GC07P107660 | 4.296963692 | <a href="https://www.genecards.org/cgi-bin/carddisp.pl?gene=SLC26A4">https://www.genecards.org/cgi-bin/carddisp.pl?gene=SLC26A4</a>   |
| PRDX5    | Peroxiredoxin 5                                | Protein Coding | 51 | GC11P064460 | 4.295131683 | <a href="https://www.genecards.org/cgi-bin/carddisp.pl?gene=PRDX5">https://www.genecards.org/cgi-bin/carddisp.pl?gene=PRDX5</a>       |
| SEMA4D   | Semaphorin 4D                                  | Protein Coding | 53 | GC09M089360 | 4.28213644  | <a href="https://www.genecards.org/cgi-bin/carddisp.pl?gene=SEMA4D">https://www.genecards.org/cgi-bin/carddisp.pl?gene=SEMA4D</a>     |
| NKX2-1   | NK2 Homeobox 1                                 | Protein Coding | 53 | GC14M036516 | 4.278104782 | <a href="https://www.genecards.org/cgi-bin/carddisp.pl?gene=NKX2-1">https://www.genecards.org/cgi-bin/carddisp.pl?gene=NKX2-1</a>     |
| NEU3     | Neuraminidase 3                                | Protein Coding | 45 | GC11P078455 | 4.275635242 | <a href="https://www.genecards.org/cgi-bin/carddisp.pl?gene=NEU3">https://www.genecards.org/cgi-bin/carddisp.pl?gene=NEU3</a>         |
| WRN      | WRN RecQ Like Helicase                         | Protein Coding | 53 | GC08P031033 | 4.274279118 | <a href="https://www.genecards.org/cgi-bin/carddisp.pl?gene=WRN">https://www.genecards.org/cgi-bin/carddisp.pl?gene=WRN</a>           |
| TBK1     | TANK Binding Kinase 1                          | Protein Coding | 56 | GC12P064451 | 4.270060539 | <a href="https://www.genecards.org/cgi-bin/carddisp.pl?gene=TBK1">https://www.genecards.org/cgi-bin/carddisp.pl?gene=TBK1</a>         |
| B4GALNT1 | Beta-1,4-N-Acetyl-Galactosaminyltransferase 1  | Protein Coding | 53 | GC12M057623 | 4.263757229 | <a href="https://www.genecards.org/cgi-bin/carddisp.pl?gene=B4GALNT1">https://www.genecards.org/cgi-bin/carddisp.pl?gene=B4GALNT1</a> |

|         |                                                           |                |    |             |             |                                                                                                                                     |
|---------|-----------------------------------------------------------|----------------|----|-------------|-------------|-------------------------------------------------------------------------------------------------------------------------------------|
| CD19    | CD19 Molecule                                             | Protein Coding | 58 | GC16P042650 | 4.263446808 | <a href="https://www.genecards.org/cgi-bin/carddisp.pl?gene=CD19">https://www.genecards.org/cgi-bin/carddisp.pl?gene=CD19</a>       |
| IKBKB   | Inhibitor Of Nuclear Factor Kappa B Kinase Subunit Beta   | Protein Coding | 61 | GC08P042271 | 4.261201859 | <a href="https://www.genecards.org/cgi-bin/carddisp.pl?gene=IKBKB">https://www.genecards.org/cgi-bin/carddisp.pl?gene=IKBKB</a>     |
| ACOT12  | Acyl-CoA Thioesterase 12                                  | Protein Coding | 44 | GC05M081309 | 4.259821892 | <a href="https://www.genecards.org/cgi-bin/carddisp.pl?gene=ACOT12">https://www.genecards.org/cgi-bin/carddisp.pl?gene=ACOT12</a>   |
| NRAS    | NRAS Proto-Oncogene, GTPase                               | Protein Coding | 57 | GC01M114704 | 4.258516312 | <a href="https://www.genecards.org/cgi-bin/carddisp.pl?gene=NRAS">https://www.genecards.org/cgi-bin/carddisp.pl?gene=NRAS</a>       |
| ABCD2   | ATP Binding Cassette Subfamily D Member 2                 | Protein Coding | 47 | GC12M039530 | 4.252993107 | <a href="https://www.genecards.org/cgi-bin/carddisp.pl?gene=ABCD2">https://www.genecards.org/cgi-bin/carddisp.pl?gene=ABCD2</a>     |
| FAR1    | Fatty Acyl-CoA Reductase 1                                | Protein Coding | 49 | GC11P013668 | 4.249789238 | <a href="https://www.genecards.org/cgi-bin/carddisp.pl?gene=FAR1">https://www.genecards.org/cgi-bin/carddisp.pl?gene=FAR1</a>       |
| SLC1A3  | Solute Carrier Family 1 Member 3                          | Protein Coding | 56 | GC05P036654 | 4.249479294 | <a href="https://www.genecards.org/cgi-bin/carddisp.pl?gene=SLC1A3">https://www.genecards.org/cgi-bin/carddisp.pl?gene=SLC1A3</a>   |
| PTK2B   | Protein Tyrosine Kinase 2 Beta                            | Protein Coding | 55 | GC08P027311 | 4.24893856  | <a href="https://www.genecards.org/cgi-bin/carddisp.pl?gene=PTK2B">https://www.genecards.org/cgi-bin/carddisp.pl?gene=PTK2B</a>     |
| PRKG1   | Protein Kinase CGMP-Dependent 1                           | Protein Coding | 57 | GC10P050991 | 4.246487141 | <a href="https://www.genecards.org/cgi-bin/carddisp.pl?gene=PRKG1">https://www.genecards.org/cgi-bin/carddisp.pl?gene=PRKG1</a>     |
| PIKFYVE | Phosphoinositide Kinase, FYVE-Type Zinc Finger Containing | Protein Coding | 55 | GC02P208266 | 4.238278866 | <a href="https://www.genecards.org/cgi-bin/carddisp.pl?gene=PIKFYVE">https://www.genecards.org/cgi-bin/carddisp.pl?gene=PIKFYVE</a> |
| NTRK1   | Neurotrophic Receptor Tyrosine Kinase 1                   | Protein Coding | 57 | GC01P156815 | 4.233635426 | <a href="https://www.genecards.org/cgi-bin/carddisp.pl?gene=NTRK1">https://www.genecards.org/cgi-bin/carddisp.pl?gene=NTRK1</a>     |
| PLAU    | Plasminogen Activator, Urokinase                          | Protein Coding | 59 | GC10P073909 | 4.2326684   | <a href="https://www.genecards.org/cgi-bin/carddisp.pl?gene=PLAU">https://www.genecards.org/cgi-bin/carddisp.pl?gene=PLAU</a>       |
| ITGAM   | Integrin Subunit Alpha M                                  | Protein Coding | 55 | GC16P042850 | 4.231232643 | <a href="https://www.genecards.org/cgi-bin/carddisp.pl?gene=ITGAM">https://www.genecards.org/cgi-bin/carddisp.pl?gene=ITGAM</a>     |
| HPX     | Hemopexin                                                 | Protein Coding | 48 | GC11M006939 | 4.224319935 | <a href="https://www.genecards.org/cgi-bin/carddisp.pl?gene=HPX">https://www.genecards.org/cgi-bin/carddisp.pl?gene=HPX</a>         |
| VIP     | Vasoactive Intestinal Peptide                             | Protein Coding | 51 | GC06P152750 | 4.223753452 | <a href="https://www.genecards.org/cgi-bin/carddisp.pl?gene=VIP">https://www.genecards.org/cgi-bin/carddisp.pl?gene=VIP</a>         |

|        |                                                                  |                |    |             |             |                                                                                                                                   |
|--------|------------------------------------------------------------------|----------------|----|-------------|-------------|-----------------------------------------------------------------------------------------------------------------------------------|
| SYNJ1  | Synaptojanin 1                                                   | Protein Coding | 52 | GC21M032628 | 4.215205193 | <a href="https://www.genecards.org/cgi-bin/carddisp.pl?gene=SYNJ1">https://www.genecards.org/cgi-bin/carddisp.pl?gene=SYNJ1</a>   |
| PRSS1  | Serine Protease 1                                                | Protein Coding | 51 | GC07P149953 | 4.214827061 | <a href="https://www.genecards.org/cgi-bin/carddisp.pl?gene=PRSS1">https://www.genecards.org/cgi-bin/carddisp.pl?gene=PRSS1</a>   |
| IDO2   | Indoleamine 2,3-Dioxygenase 2                                    | Protein Coding | 45 | GC08P039976 | 4.204556465 | <a href="https://www.genecards.org/cgi-bin/carddisp.pl?gene=IDO2">https://www.genecards.org/cgi-bin/carddisp.pl?gene=IDO2</a>     |
| OARD1  | O-Acyl-ADP-Ribose Deacylase 1                                    | Protein Coding | 39 | GC06M071913 | 4.190365314 | <a href="https://www.genecards.org/cgi-bin/carddisp.pl?gene=OARD1">https://www.genecards.org/cgi-bin/carddisp.pl?gene=OARD1</a>   |
| PSEN2  | Presenilin 2                                                     | Protein Coding | 56 | GC01P226870 | 4.188182831 | <a href="https://www.genecards.org/cgi-bin/carddisp.pl?gene=PSEN2">https://www.genecards.org/cgi-bin/carddisp.pl?gene=PSEN2</a>   |
| GPC3   | Glypican 3                                                       | Protein Coding | 53 | GC0XM133535 | 4.185760498 | <a href="https://www.genecards.org/cgi-bin/carddisp.pl?gene=GPC3">https://www.genecards.org/cgi-bin/carddisp.pl?gene=GPC3</a>     |
| HDAC3  | Histone Deacetylase 3                                            | Protein Coding | 56 | GC05M141620 | 4.183124065 | <a href="https://www.genecards.org/cgi-bin/carddisp.pl?gene=HDAC3">https://www.genecards.org/cgi-bin/carddisp.pl?gene=HDAC3</a>   |
| PTGES2 | Prostaglandin E Synthase 2                                       | Protein Coding | 50 | GC09M128120 | 4.17619276  | <a href="https://www.genecards.org/cgi-bin/carddisp.pl?gene=PTGES2">https://www.genecards.org/cgi-bin/carddisp.pl?gene=PTGES2</a> |
| PTPMT1 | Protein Tyrosine Phosphatase Mitochondrial 1                     | Protein Coding | 44 | GC11P047568 | 4.171000481 | <a href="https://www.genecards.org/cgi-bin/carddisp.pl?gene=PTPMT1">https://www.genecards.org/cgi-bin/carddisp.pl?gene=PTPMT1</a> |
| P4HB   | Prolyl 4-Hydroxylase Subunit Beta                                | Protein Coding | 56 | GC17M081843 | 4.170737743 | <a href="https://www.genecards.org/cgi-bin/carddisp.pl?gene=P4HB">https://www.genecards.org/cgi-bin/carddisp.pl?gene=P4HB</a>     |
| XK     | X-Linked Kx Blood Group Antigen, Kell And VPS13A Binding Protein | Protein Coding | 47 | GC0XP037685 | 4.168406487 | <a href="https://www.genecards.org/cgi-bin/carddisp.pl?gene=XK">https://www.genecards.org/cgi-bin/carddisp.pl?gene=XK</a>         |
| CDK4   | Cyclin Dependent Kinase 4                                        | Protein Coding | 61 | GC12M057787 | 4.165514946 | <a href="https://www.genecards.org/cgi-bin/carddisp.pl?gene=CDK4">https://www.genecards.org/cgi-bin/carddisp.pl?gene=CDK4</a>     |
| SPTLC3 | Serine Palmitoyltransferase Long Chain Base Subunit 3            | Protein Coding | 46 | GC20P013008 | 4.162569523 | <a href="https://www.genecards.org/cgi-bin/carddisp.pl?gene=SPTLC3">https://www.genecards.org/cgi-bin/carddisp.pl?gene=SPTLC3</a> |
| XPC    | XPC Complex Subunit, DNA Damage Recognition And Repair Factor    | Protein Coding | 52 | GC03M021831 | 4.16207695  | <a href="https://www.genecards.org/cgi-bin/carddisp.pl?gene=XPC">https://www.genecards.org/cgi-bin/carddisp.pl?gene=XPC</a>       |
| SLC1A1 | Solute Carrier Family 1 Member 1                                 | Protein Coding | 56 | GC09P004490 | 4.161443233 | <a href="https://www.genecards.org/cgi-bin/carddisp.pl?gene=SLC1A1">https://www.genecards.org/cgi-bin/carddisp.pl?gene=SLC1A1</a> |

|         |                                                                  |                |    |             |             |                                                                                                                                     |
|---------|------------------------------------------------------------------|----------------|----|-------------|-------------|-------------------------------------------------------------------------------------------------------------------------------------|
| OGT     | O-Linked N-Acetylglucosamine (GlcNAc) Transferase                | Protein Coding | 51 | GC0XP071534 | 4.159537315 | <a href="https://www.genecards.org/cgi-bin/carddisp.pl?gene=OGT">https://www.genecards.org/cgi-bin/carddisp.pl?gene=OGT</a>         |
| SMAD3   | SMAD Family Member 3                                             | Protein Coding | 59 | GC15P067063 | 4.158631802 | <a href="https://www.genecards.org/cgi-bin/carddisp.pl?gene=SMAD3">https://www.genecards.org/cgi-bin/carddisp.pl?gene=SMAD3</a>     |
| ELOVL1  | ELOVL Fatty Acid Elongase 1                                      | Protein Coding | 48 | GC01M043363 | 4.157157898 | <a href="https://www.genecards.org/cgi-bin/carddisp.pl?gene=ELOVL1">https://www.genecards.org/cgi-bin/carddisp.pl?gene=ELOVL1</a>   |
| TRPV4   | Transient Receptor Potential Cation Channel Subfamily V Member 4 | Protein Coding | 56 | GC12M109783 | 4.151106358 | <a href="https://www.genecards.org/cgi-bin/carddisp.pl?gene=TRPV4">https://www.genecards.org/cgi-bin/carddisp.pl?gene=TRPV4</a>     |
| GSTA2   | Glutathione S-Transferase Alpha 2                                | Protein Coding | 47 | GC06M052750 | 4.144515514 | <a href="https://www.genecards.org/cgi-bin/carddisp.pl?gene=GSTA2">https://www.genecards.org/cgi-bin/carddisp.pl?gene=GSTA2</a>     |
| M6PR    | Mannose-6-Phosphate Receptor, Cation Dependent                   | Protein Coding | 50 | GC12M009029 | 4.144075394 | <a href="https://www.genecards.org/cgi-bin/carddisp.pl?gene=M6PR">https://www.genecards.org/cgi-bin/carddisp.pl?gene=M6PR</a>       |
| SLCO2B1 | Solute Carrier Organic Anion Transporter Family Member 2B1       | Protein Coding | 51 | GC11P078457 | 4.143146515 | <a href="https://www.genecards.org/cgi-bin/carddisp.pl?gene=SLCO2B1">https://www.genecards.org/cgi-bin/carddisp.pl?gene=SLCO2B1</a> |
| ENO2    | Enolase 2                                                        | Protein Coding | 54 | GC12P006913 | 4.141520023 | <a href="https://www.genecards.org/cgi-bin/carddisp.pl?gene=ENO2">https://www.genecards.org/cgi-bin/carddisp.pl?gene=ENO2</a>       |
| CD40    | CD40 Molecule                                                    | Protein Coding | 57 | GC20P046118 | 4.141496658 | <a href="https://www.genecards.org/cgi-bin/carddisp.pl?gene=CD40">https://www.genecards.org/cgi-bin/carddisp.pl?gene=CD40</a>       |
| NAT8L   | N-Acetyltransferase 8 Like                                       | Protein Coding | 44 | GC04P002061 | 4.136281013 | <a href="https://www.genecards.org/cgi-bin/carddisp.pl?gene=NAT8L">https://www.genecards.org/cgi-bin/carddisp.pl?gene=NAT8L</a>     |
| CD8A    | CD8a Molecule                                                    | Protein Coding | 54 | GC02M086784 | 4.132395267 | <a href="https://www.genecards.org/cgi-bin/carddisp.pl?gene=CD8A">https://www.genecards.org/cgi-bin/carddisp.pl?gene=CD8A</a>       |
| FGF19   | Fibroblast Growth Factor 19                                      | Protein Coding | 49 | GC11M099882 | 4.129551411 | <a href="https://www.genecards.org/cgi-bin/carddisp.pl?gene=FGF19">https://www.genecards.org/cgi-bin/carddisp.pl?gene=FGF19</a>     |
| ACAA2   | Acetyl-CoA Acyltransferase 2                                     | Protein Coding | 51 | GC18M049782 | 4.127201557 | <a href="https://www.genecards.org/cgi-bin/carddisp.pl?gene=ACAA2">https://www.genecards.org/cgi-bin/carddisp.pl?gene=ACAA2</a>     |
| DCN     | Decorin                                                          | Protein Coding | 54 | GC12M091140 | 4.126251698 | <a href="https://www.genecards.org/cgi-bin/carddisp.pl?gene=DCN">https://www.genecards.org/cgi-bin/carddisp.pl?gene=DCN</a>         |
| XIAP    | X-Linked Inhibitor Of Apoptosis                                  | Protein Coding | 59 | GC0XP123859 | 4.12197876  | <a href="https://www.genecards.org/cgi-bin/carddisp.pl?gene=XIAP">https://www.genecards.org/cgi-bin/carddisp.pl?gene=XIAP</a>       |

|          |                                                    |                |    |             |             |                                                                                                                                       |
|----------|----------------------------------------------------|----------------|----|-------------|-------------|---------------------------------------------------------------------------------------------------------------------------------------|
| MDM2     | MDM2 Proto-Oncogene                                | Protein Coding | 59 | GC12P068808 | 4.121714115 | <a href="https://www.genecards.org/cgi-bin/carddisp.pl?gene=MDM2">https://www.genecards.org/cgi-bin/carddisp.pl?gene=MDM2</a>         |
| OPRM1    | Opioid Receptor Mu 1                               | Protein Coding | 55 | GC06P154123 | 4.121528625 | <a href="https://www.genecards.org/cgi-bin/carddisp.pl?gene=OPRM1">https://www.genecards.org/cgi-bin/carddisp.pl?gene=OPRM1</a>       |
| FHIT     | Fragile Histidine Triad Diadenosine Triphosphatase | Protein Coding | 51 | GC03M059747 | 4.118954182 | <a href="https://www.genecards.org/cgi-bin/carddisp.pl?gene=FHIT">https://www.genecards.org/cgi-bin/carddisp.pl?gene=FHIT</a>         |
| LRP6     | LDL Receptor Related Protein 6                     | Protein Coding | 55 | GC12M022658 | 4.107475281 | <a href="https://www.genecards.org/cgi-bin/carddisp.pl?gene=LRP6">https://www.genecards.org/cgi-bin/carddisp.pl?gene=LRP6</a>         |
| SLC22A11 | Solute Carrier Family 22 Member 11                 | Protein Coding | 47 | GC11P064573 | 4.107285976 | <a href="https://www.genecards.org/cgi-bin/carddisp.pl?gene=SLC22A11">https://www.genecards.org/cgi-bin/carddisp.pl?gene=SLC22A11</a> |
| ACTA1    | Actin Alpha 1, Skeletal Muscle                     | Protein Coding | 55 | GC01M229647 | 4.103856087 | <a href="https://www.genecards.org/cgi-bin/carddisp.pl?gene=ACTA1">https://www.genecards.org/cgi-bin/carddisp.pl?gene=ACTA1</a>       |
| ITGB3    | Integrin Subunit Beta 3                            | Protein Coding | 59 | GC17P062247 | 4.099756241 | <a href="https://www.genecards.org/cgi-bin/carddisp.pl?gene=ITGB3">https://www.genecards.org/cgi-bin/carddisp.pl?gene=ITGB3</a>       |
| NPM1     | Nucleophosmin 1                                    | Protein Coding | 57 | GC05P171387 | 4.094702721 | <a href="https://www.genecards.org/cgi-bin/carddisp.pl?gene=NPM1">https://www.genecards.org/cgi-bin/carddisp.pl?gene=NPM1</a>         |
| SGK1     | Serum/Glucocorticoid Regulated Kinase 1            | Protein Coding | 56 | GC06M134169 | 4.088385105 | <a href="https://www.genecards.org/cgi-bin/carddisp.pl?gene=SGK1">https://www.genecards.org/cgi-bin/carddisp.pl?gene=SGK1</a>         |
| IL1R1    | Interleukin 1 Receptor Type 1                      | Protein Coding | 53 | GC02P102136 | 4.08834362  | <a href="https://www.genecards.org/cgi-bin/carddisp.pl?gene=IL1R1">https://www.genecards.org/cgi-bin/carddisp.pl?gene=IL1R1</a>       |
| DLG4     | Discs Large MAGUK Scaffold Protein 4               | Protein Coding | 55 | GC17M007226 | 4.085865021 | <a href="https://www.genecards.org/cgi-bin/carddisp.pl?gene=DLG4">https://www.genecards.org/cgi-bin/carddisp.pl?gene=DLG4</a>         |
| PRTN3    | Proteinase 3                                       | Protein Coding | 52 | GC19P000840 | 4.081354618 | <a href="https://www.genecards.org/cgi-bin/carddisp.pl?gene=PRTN3">https://www.genecards.org/cgi-bin/carddisp.pl?gene=PRTN3</a>       |
| PPA1     | Inorganic Pyrophosphatase 1                        | Protein Coding | 50 | GC10M070202 | 4.078914165 | <a href="https://www.genecards.org/cgi-bin/carddisp.pl?gene=PPA1">https://www.genecards.org/cgi-bin/carddisp.pl?gene=PPA1</a>         |
| PDHA2    | Pyruvate Dehydrogenase E1 Subunit Alpha 2          | Protein Coding | 50 | GC04P095840 | 4.076750755 | <a href="https://www.genecards.org/cgi-bin/carddisp.pl?gene=PDHA2">https://www.genecards.org/cgi-bin/carddisp.pl?gene=PDHA2</a>       |
| OXT      | Oxytocin/Neurophysin I Prepropeptide               | Protein Coding | 44 | GC20P004488 | 4.070765495 | <a href="https://www.genecards.org/cgi-bin/carddisp.pl?gene=OXT">https://www.genecards.org/cgi-bin/carddisp.pl?gene=OXT</a>           |

|          |                                                                 |                |    |             |             |                                                                                                                                       |
|----------|-----------------------------------------------------------------|----------------|----|-------------|-------------|---------------------------------------------------------------------------------------------------------------------------------------|
| LMNB1    | Lamin B1                                                        | Protein Coding | 53 | GC05P126776 | 4.070357323 | <a href="https://www.genecards.org/cgi-bin/carddisp.pl?gene=LMNB1">https://www.genecards.org/cgi-bin/carddisp.pl?gene=LMNB1</a>       |
| INPP5D   | Inositol Polyphosphate-5-Phosphatase D                          | Protein Coding | 51 | GC02P233059 | 4.067728996 | <a href="https://www.genecards.org/cgi-bin/carddisp.pl?gene=INPP5D">https://www.genecards.org/cgi-bin/carddisp.pl?gene=INPP5D</a>     |
| NCOR2    | Nuclear Receptor Corepressor 2                                  | Protein Coding | 50 | GC12M124324 | 4.064220428 | <a href="https://www.genecards.org/cgi-bin/carddisp.pl?gene=NCOR2">https://www.genecards.org/cgi-bin/carddisp.pl?gene=NCOR2</a>       |
| XBP1     | X-Box Binding Protein 1                                         | Protein Coding | 52 | GC22M028794 | 4.061617851 | <a href="https://www.genecards.org/cgi-bin/carddisp.pl?gene=XBP1">https://www.genecards.org/cgi-bin/carddisp.pl?gene=XBP1</a>         |
| CHUK     | Component Of Inhibitor Of Nuclear Factor Kappa B Kinase Complex | Protein Coding | 58 | GC10M100202 | 4.053830147 | <a href="https://www.genecards.org/cgi-bin/carddisp.pl?gene=CHUK">https://www.genecards.org/cgi-bin/carddisp.pl?gene=CHUK</a>         |
| SERPINA7 | Serpin Family A Member 7                                        | Protein Coding | 48 | GC0XM106032 | 4.048786163 | <a href="https://www.genecards.org/cgi-bin/carddisp.pl?gene=SERPINA7">https://www.genecards.org/cgi-bin/carddisp.pl?gene=SERPINA7</a> |
| RB1      | RB Transcriptional Corepressor 1                                | Protein Coding | 55 | GC13P048303 | 4.047911167 | <a href="https://www.genecards.org/cgi-bin/carddisp.pl?gene=RB1">https://www.genecards.org/cgi-bin/carddisp.pl?gene=RB1</a>           |
| NOTCH1   | Notch Receptor 1                                                | Protein Coding | 60 | GC09M137729 | 4.046423912 | <a href="https://www.genecards.org/cgi-bin/carddisp.pl?gene=NOTCH1">https://www.genecards.org/cgi-bin/carddisp.pl?gene=NOTCH1</a>     |
| TSC1     | TSC Complex Subunit 1                                           | Protein Coding | 54 | GC09M132891 | 4.045608997 | <a href="https://www.genecards.org/cgi-bin/carddisp.pl?gene=TSC1">https://www.genecards.org/cgi-bin/carddisp.pl?gene=TSC1</a>         |
| CEBPB    | CCAAT Enhancer Binding Protein Beta                             | Protein Coding | 50 | GC20P050190 | 4.044969082 | <a href="https://www.genecards.org/cgi-bin/carddisp.pl?gene=CEBPB">https://www.genecards.org/cgi-bin/carddisp.pl?gene=CEBPB</a>       |
| PLD1     | Phospholipase D1                                                | Protein Coding | 55 | GC03M171600 | 4.041944981 | <a href="https://www.genecards.org/cgi-bin/carddisp.pl?gene=PLD1">https://www.genecards.org/cgi-bin/carddisp.pl?gene=PLD1</a>         |
| UGT2B10  | UDP Glucuronosyltransferase Family 2 Member B10                 | Protein Coding | 47 | GC04P068816 | 4.030697823 | <a href="https://www.genecards.org/cgi-bin/carddisp.pl?gene=UGT2B10">https://www.genecards.org/cgi-bin/carddisp.pl?gene=UGT2B10</a>   |
| WDR45    | WD Repeat Domain 45                                             | Protein Coding | 46 | GC0XM049074 | 4.027177334 | <a href="https://www.genecards.org/cgi-bin/carddisp.pl?gene=WDR45">https://www.genecards.org/cgi-bin/carddisp.pl?gene=WDR45</a>       |
| RIPK1    | Receptor Interacting Serine/Threonine Kinase 1                  | Protein Coding | 56 | GC06P003333 | 4.020352364 | <a href="https://www.genecards.org/cgi-bin/carddisp.pl?gene=RIPK1">https://www.genecards.org/cgi-bin/carddisp.pl?gene=RIPK1</a>       |
| EIF2AK4  | Eukaryotic Translation Initiation Factor 2 Alpha Kinase 4       | Protein Coding | 52 | GC15P039934 | 4.020245075 | <a href="https://www.genecards.org/cgi-bin/carddisp.pl?gene=EIF2AK4">https://www.genecards.org/cgi-bin/carddisp.pl?gene=EIF2AK4</a>   |

|         |                                                         |                |    |             |             |                                                                                                                                     |
|---------|---------------------------------------------------------|----------------|----|-------------|-------------|-------------------------------------------------------------------------------------------------------------------------------------|
| CERS1   | Ceramide Synthase 1                                     | Protein Coding | 49 | GC19M018868 | 4.019072056 | <a href="https://www.genecards.org/cgi-bin/carddisp.pl?gene=CERS1">https://www.genecards.org/cgi-bin/carddisp.pl?gene=CERS1</a>     |
| ENTPD1  | Ectonucleoside Triphosphate Diphosphohydrolase 1        | Protein Coding | 57 | GC10P095711 | 4.01881361  | <a href="https://www.genecards.org/cgi-bin/carddisp.pl?gene=ENTPD1">https://www.genecards.org/cgi-bin/carddisp.pl?gene=ENTPD1</a>   |
| CYP51A1 | Cytochrome P450 Family 51 Subfamily A Member 1          | Protein Coding | 50 | GC07M092112 | 4.017743111 | <a href="https://www.genecards.org/cgi-bin/carddisp.pl?gene=CYP51A1">https://www.genecards.org/cgi-bin/carddisp.pl?gene=CYP51A1</a> |
| MAP3K5  | Mitogen-Activated Protein Kinase Kinase Kinase 5        | Protein Coding | 55 | GC06M136557 | 4.017704487 | <a href="https://www.genecards.org/cgi-bin/carddisp.pl?gene=MAP3K5">https://www.genecards.org/cgi-bin/carddisp.pl?gene=MAP3K5</a>   |
| SLC36A1 | Solute Carrier Family 36 Member 1                       | Protein Coding | 46 | GC05P151344 | 4.017536163 | <a href="https://www.genecards.org/cgi-bin/carddisp.pl?gene=SLC36A1">https://www.genecards.org/cgi-bin/carddisp.pl?gene=SLC36A1</a> |
| HMMR    | Hyaluronan Mediated Motility Receptor                   | Protein Coding | 50 | GC05P163480 | 4.016493797 | <a href="https://www.genecards.org/cgi-bin/carddisp.pl?gene=HMMR">https://www.genecards.org/cgi-bin/carddisp.pl?gene=HMMR</a>       |
| PRKCB   | Protein Kinase C Beta                                   | Protein Coding | 55 | GC16P024574 | 4.015511513 | <a href="https://www.genecards.org/cgi-bin/carddisp.pl?gene=PRKCB">https://www.genecards.org/cgi-bin/carddisp.pl?gene=PRKCB</a>     |
| MOGAT2  | Monoacylglycerol O-Acyltransferase 2                    | Protein Coding | 43 | GC11P075717 | 4.011301994 | <a href="https://www.genecards.org/cgi-bin/carddisp.pl?gene=MOGAT2">https://www.genecards.org/cgi-bin/carddisp.pl?gene=MOGAT2</a>   |
| APOM    | Apolipoprotein M                                        | Protein Coding | 47 | GC06P092161 | 3.997857571 | <a href="https://www.genecards.org/cgi-bin/carddisp.pl?gene=APOM">https://www.genecards.org/cgi-bin/carddisp.pl?gene=APOM</a>       |
| THRB    | Thyroid Hormone Receptor Beta                           | Protein Coding | 56 | GC03M024117 | 3.983554363 | <a href="https://www.genecards.org/cgi-bin/carddisp.pl?gene=THRB">https://www.genecards.org/cgi-bin/carddisp.pl?gene=THRB</a>       |
| CKB     | Creatine Kinase B                                       | Protein Coding | 51 | GC14M103519 | 3.977226257 | <a href="https://www.genecards.org/cgi-bin/carddisp.pl?gene=CKB">https://www.genecards.org/cgi-bin/carddisp.pl?gene=CKB</a>         |
| RAPSN   | Receptor Associated Protein Of The Synapse              | Protein Coding | 48 | GC11M099370 | 3.971043825 | <a href="https://www.genecards.org/cgi-bin/carddisp.pl?gene=RAPSN">https://www.genecards.org/cgi-bin/carddisp.pl?gene=RAPSN</a>     |
| GRP     | Gastrin Releasing Peptide                               | Protein Coding | 47 | GC18P059220 | 3.969022274 | <a href="https://www.genecards.org/cgi-bin/carddisp.pl?gene=GRP">https://www.genecards.org/cgi-bin/carddisp.pl?gene=GRP</a>         |
| KCNMA1  | Potassium Calcium-Activated Channel Subfamily M Alpha 1 | Protein Coding | 56 | GC10M076869 | 3.950283051 | <a href="https://www.genecards.org/cgi-bin/carddisp.pl?gene=KCNMA1">https://www.genecards.org/cgi-bin/carddisp.pl?gene=KCNMA1</a>   |
| KLK3    | Kallikrein Related Peptidase 3                          | Protein Coding | 53 | GC19P050854 | 3.946335554 | <a href="https://www.genecards.org/cgi-bin/carddisp.pl?gene=KLK3">https://www.genecards.org/cgi-bin/carddisp.pl?gene=KLK3</a>       |



|         |                                               |                |    |             |             |                                                                                                                                     |
|---------|-----------------------------------------------|----------------|----|-------------|-------------|-------------------------------------------------------------------------------------------------------------------------------------|
| CDK5    | Cyclin Dependent Kinase 5                     | Protein Coding | 60 | GC07M151053 | 3.944981575 | <a href="https://www.genecards.org/cgi-bin/carddisp.pl?gene=CDK5">https://www.genecards.org/cgi-bin/carddisp.pl?gene=CDK5</a>       |
| SLC12A5 | Solute Carrier Family 12 Member 5             | Protein Coding | 55 | GC20P046021 | 3.943710566 | <a href="https://www.genecards.org/cgi-bin/carddisp.pl?gene=SLC12A5">https://www.genecards.org/cgi-bin/carddisp.pl?gene=SLC12A5</a> |
| CSF3    | Colony Stimulating Factor 3                   | Protein Coding | 47 | GC17P040015 | 3.937470913 | <a href="https://www.genecards.org/cgi-bin/carddisp.pl?gene=CSF3">https://www.genecards.org/cgi-bin/carddisp.pl?gene=CSF3</a>       |
| PDE3B   | Phosphodiesterase 3B                          | Protein Coding | 50 | GC11P014643 | 3.933916092 | <a href="https://www.genecards.org/cgi-bin/carddisp.pl?gene=PDE3B">https://www.genecards.org/cgi-bin/carddisp.pl?gene=PDE3B</a>     |
| IFNA2   | Interferon Alpha 2                            | Protein Coding | 50 | GC09M021384 | 3.93334651  | <a href="https://www.genecards.org/cgi-bin/carddisp.pl?gene=IFNA2">https://www.genecards.org/cgi-bin/carddisp.pl?gene=IFNA2</a>     |
| SLC1A4  | Solute Carrier Family 1 Member 4              | Protein Coding | 52 | GC02P064988 | 3.931900501 | <a href="https://www.genecards.org/cgi-bin/carddisp.pl?gene=SLC1A4">https://www.genecards.org/cgi-bin/carddisp.pl?gene=SLC1A4</a>   |
| AKT3    | AKT Serine/Threonine Kinase 3                 | Protein Coding | 61 | GC01M243488 | 3.922803879 | <a href="https://www.genecards.org/cgi-bin/carddisp.pl?gene=AKT3">https://www.genecards.org/cgi-bin/carddisp.pl?gene=AKT3</a>       |
| H19     | H19 Imprinted Maternally Expressed Transcript | RNA Gene       | 30 | GC11M001995 | 3.921946287 | <a href="https://www.genecards.org/cgi-bin/carddisp.pl?gene=H19">https://www.genecards.org/cgi-bin/carddisp.pl?gene=H19</a>         |
| CTLA4   | Cytotoxic T-Lymphocyte Associated Protein 4   | Protein Coding | 54 | GC02P203854 | 3.916200161 | <a href="https://www.genecards.org/cgi-bin/carddisp.pl?gene=CTLA4">https://www.genecards.org/cgi-bin/carddisp.pl?gene=CTLA4</a>     |
| RAC1    | Rac Family Small GTPase 1                     | Protein Coding | 55 | GC07P006377 | 3.913594246 | <a href="https://www.genecards.org/cgi-bin/carddisp.pl?gene=RAC1">https://www.genecards.org/cgi-bin/carddisp.pl?gene=RAC1</a>       |
| H4C16   | H4 Histone 16                                 | Protein Coding | 42 | GC12M022801 | 3.911123037 | <a href="https://www.genecards.org/cgi-bin/carddisp.pl?gene=H4C16">https://www.genecards.org/cgi-bin/carddisp.pl?gene=H4C16</a>     |
| GPX3    | Glutathione Peroxidase 3                      | Protein Coding | 47 | GC05P150997 | 3.910354376 | <a href="https://www.genecards.org/cgi-bin/carddisp.pl?gene=GPX3">https://www.genecards.org/cgi-bin/carddisp.pl?gene=GPX3</a>       |
| MYO5B   | Myosin VB                                     | Protein Coding | 50 | GC18M049822 | 3.909657717 | <a href="https://www.genecards.org/cgi-bin/carddisp.pl?gene=MYO5B">https://www.genecards.org/cgi-bin/carddisp.pl?gene=MYO5B</a>     |
| STUB1   | STIP1 Homology And U-Box Containing Protein 1 | Protein Coding | 53 | GC16P013453 | 3.907438517 | <a href="https://www.genecards.org/cgi-bin/carddisp.pl?gene=STUB1">https://www.genecards.org/cgi-bin/carddisp.pl?gene=STUB1</a>     |
| E2F1    | E2F Transcription Factor 1                    | Protein Coding | 50 | GC20M033675 | 3.905562401 | <a href="https://www.genecards.org/cgi-bin/carddisp.pl?gene=E2F1">https://www.genecards.org/cgi-bin/carddisp.pl?gene=E2F1</a>       |

|          |                                                                     |                |    |             |             |                                                                                                                                       |
|----------|---------------------------------------------------------------------|----------------|----|-------------|-------------|---------------------------------------------------------------------------------------------------------------------------------------|
| IL15     | Interleukin 15                                                      | Protein Coding | 49 | GC04P141636 | 3.902137041 | <a href="https://www.genecards.org/cgi-bin/carddisp.pl?gene=IL15">https://www.genecards.org/cgi-bin/carddisp.pl?gene=IL15</a>         |
| HTR2A    | 5-Hydroxytryptamine Receptor 2A                                     | Protein Coding | 55 | GC13M046831 | 3.901376009 | <a href="https://www.genecards.org/cgi-bin/carddisp.pl?gene=HTR2A">https://www.genecards.org/cgi-bin/carddisp.pl?gene=HTR2A</a>       |
| LPO      | Lactoperoxidase                                                     | Protein Coding | 46 | GC17P058218 | 3.900479317 | <a href="https://www.genecards.org/cgi-bin/carddisp.pl?gene=LPO">https://www.genecards.org/cgi-bin/carddisp.pl?gene=LPO</a>           |
| LAMP1    | Lysosomal Associated Membrane Protein 1                             | Protein Coding | 50 | GC13P113297 | 3.897934437 | <a href="https://www.genecards.org/cgi-bin/carddisp.pl?gene=LAMP1">https://www.genecards.org/cgi-bin/carddisp.pl?gene=LAMP1</a>       |
| IKBKG    | Inhibitor Of Nuclear Factor Kappa B Kinase Regulatory Subunit Gamma | Protein Coding | 55 | GC0XP154541 | 3.894810677 | <a href="https://www.genecards.org/cgi-bin/carddisp.pl?gene=IKBKG">https://www.genecards.org/cgi-bin/carddisp.pl?gene=IKBKG</a>       |
| ADM      | Adrenomedullin                                                      | Protein Coding | 51 | GC11P010304 | 3.88862443  | <a href="https://www.genecards.org/cgi-bin/carddisp.pl?gene=ADM">https://www.genecards.org/cgi-bin/carddisp.pl?gene=ADM</a>           |
| MSH6     | MutS Homolog 6                                                      | Protein Coding | 55 | GC02P047695 | 3.887536764 | <a href="https://www.genecards.org/cgi-bin/carddisp.pl?gene=MSH6">https://www.genecards.org/cgi-bin/carddisp.pl?gene=MSH6</a>         |
| CA9      | Carbonic Anhydrase 9                                                | Protein Coding | 53 | GC09P035673 | 3.883813143 | <a href="https://www.genecards.org/cgi-bin/carddisp.pl?gene=CA9">https://www.genecards.org/cgi-bin/carddisp.pl?gene=CA9</a>           |
| TUBB1    | Tubulin Beta 1 Class VI                                             | Protein Coding | 53 | GC20P059020 | 3.882990837 | <a href="https://www.genecards.org/cgi-bin/carddisp.pl?gene=TUBB1">https://www.genecards.org/cgi-bin/carddisp.pl?gene=TUBB1</a>       |
| GATA3    | GATA Binding Protein 3                                              | Protein Coding | 56 | GC10P008045 | 3.879091263 | <a href="https://www.genecards.org/cgi-bin/carddisp.pl?gene=GATA3">https://www.genecards.org/cgi-bin/carddisp.pl?gene=GATA3</a>       |
| GRB2     | Growth Factor Receptor Bound Protein 2                              | Protein Coding | 52 | GC17M075318 | 3.878803253 | <a href="https://www.genecards.org/cgi-bin/carddisp.pl?gene=GRB2">https://www.genecards.org/cgi-bin/carddisp.pl?gene=GRB2</a>         |
| ESRRB    | Estrogen Related Receptor Beta                                      | Protein Coding | 54 | GC14P076310 | 3.874730587 | <a href="https://www.genecards.org/cgi-bin/carddisp.pl?gene=ESRRB">https://www.genecards.org/cgi-bin/carddisp.pl?gene=ESRRB</a>       |
| SERPINF1 | Serpin Family F Member 1                                            | Protein Coding | 53 | GC17P001766 | 3.874513626 | <a href="https://www.genecards.org/cgi-bin/carddisp.pl?gene=SERPINF1">https://www.genecards.org/cgi-bin/carddisp.pl?gene=SERPINF1</a> |
| IL7R     | Interleukin 7 Receptor                                              | Protein Coding | 52 | GC05P035852 | 3.873098135 | <a href="https://www.genecards.org/cgi-bin/carddisp.pl?gene=IL7R">https://www.genecards.org/cgi-bin/carddisp.pl?gene=IL7R</a>         |
| CD55     | CD55 Molecule (Cromer Blood Group)                                  | Protein Coding | 56 | GC01P207321 | 3.870641232 | <a href="https://www.genecards.org/cgi-bin/carddisp.pl?gene=CD55">https://www.genecards.org/cgi-bin/carddisp.pl?gene=CD55</a>         |

|          |                                                                       |                |    |             |             |                                                                                                                                       |
|----------|-----------------------------------------------------------------------|----------------|----|-------------|-------------|---------------------------------------------------------------------------------------------------------------------------------------|
| NPR3     | Natriuretic Peptide Receptor 3                                        | Protein Coding | 52 | GC05P032689 | 3.868728161 | <a href="https://www.genecards.org/cgi-bin/carddisp.pl?gene=NPR3">https://www.genecards.org/cgi-bin/carddisp.pl?gene=NPR3</a>         |
| HNRNPC   | Heterogeneous Nuclear Ribonucleoprotein C                             | Protein Coding | 48 | GC14M023657 | 3.863192081 | <a href="https://www.genecards.org/cgi-bin/carddisp.pl?gene=HNRNPC">https://www.genecards.org/cgi-bin/carddisp.pl?gene=HNRNPC</a>     |
| PTK2     | Protein Tyrosine Kinase 2                                             | Protein Coding | 55 | GC08M140657 | 3.861723185 | <a href="https://www.genecards.org/cgi-bin/carddisp.pl?gene=PTK2">https://www.genecards.org/cgi-bin/carddisp.pl?gene=PTK2</a>         |
| NME2     | NME/NM23 Nucleoside Diphosphate Kinase 2                              | Protein Coding | 52 | GC17P051165 | 3.860429049 | <a href="https://www.genecards.org/cgi-bin/carddisp.pl?gene=NME2">https://www.genecards.org/cgi-bin/carddisp.pl?gene=NME2</a>         |
| SLC16A10 | Solute Carrier Family 16 Member 10                                    | Protein Coding | 44 | GC06P111087 | 3.857141495 | <a href="https://www.genecards.org/cgi-bin/carddisp.pl?gene=SLC16A10">https://www.genecards.org/cgi-bin/carddisp.pl?gene=SLC16A10</a> |
| IRAK1    | Interleukin 1 Receptor Associated Kinase 1                            | Protein Coding | 56 | GC0XM154010 | 3.856891394 | <a href="https://www.genecards.org/cgi-bin/carddisp.pl?gene=IRAK1">https://www.genecards.org/cgi-bin/carddisp.pl?gene=IRAK1</a>       |
| IGFBP5   | Insulin Like Growth Factor Binding Protein 5                          | Protein Coding | 49 | GC02M216672 | 3.853482246 | <a href="https://www.genecards.org/cgi-bin/carddisp.pl?gene=IGFBP5">https://www.genecards.org/cgi-bin/carddisp.pl?gene=IGFBP5</a>     |
| KHDRBS1  | KH RNA Binding Domain Containing, Signal Transduction Associated<br>1 | Protein Coding | 47 | GC01P032013 | 3.852282047 | <a href="https://www.genecards.org/cgi-bin/carddisp.pl?gene=KHDRBS1">https://www.genecards.org/cgi-bin/carddisp.pl?gene=KHDRBS1</a>   |
| GARS1    | Glycyl-TRNA Synthetase 1                                              | Protein Coding | 52 | GC07P030580 | 3.85188961  | <a href="https://www.genecards.org/cgi-bin/carddisp.pl?gene=GARS1">https://www.genecards.org/cgi-bin/carddisp.pl?gene=GARS1</a>       |
| ACSM5    | Acyl-CoA Synthetase Medium Chain Family Member 5                      | Protein Coding | 44 | GC16P020410 | 3.850166559 | <a href="https://www.genecards.org/cgi-bin/carddisp.pl?gene=ACSM5">https://www.genecards.org/cgi-bin/carddisp.pl?gene=ACSM5</a>       |
| FGA      | Fibrinogen Alpha Chain                                                | Protein Coding | 56 | GC04M154583 | 3.84565568  | <a href="https://www.genecards.org/cgi-bin/carddisp.pl?gene=FGA">https://www.genecards.org/cgi-bin/carddisp.pl?gene=FGA</a>           |
| ADCYAP1  | Adenylate Cyclase Activating Polypeptide 1                            | Protein Coding | 47 | GC18P000895 | 3.83665657  | <a href="https://www.genecards.org/cgi-bin/carddisp.pl?gene=ADCYAP1">https://www.genecards.org/cgi-bin/carddisp.pl?gene=ADCYAP1</a>   |
| KEAP1    | Kelch Like ECH Associated Protein 1                                   | Protein Coding | 56 | GC19M010486 | 3.835975885 | <a href="https://www.genecards.org/cgi-bin/carddisp.pl?gene=KEAP1">https://www.genecards.org/cgi-bin/carddisp.pl?gene=KEAP1</a>       |
| PDE4A    | Phosphodiesterase 4A                                                  | Protein Coding | 51 | GC19P010416 | 3.835870028 | <a href="https://www.genecards.org/cgi-bin/carddisp.pl?gene=PDE4A">https://www.genecards.org/cgi-bin/carddisp.pl?gene=PDE4A</a>       |
| CCKAR    | Cholecystokinin A Receptor                                            | Protein Coding | 52 | GC04M026483 | 3.835656404 | <a href="https://www.genecards.org/cgi-bin/carddisp.pl?gene=CCKAR">https://www.genecards.org/cgi-bin/carddisp.pl?gene=CCKAR</a>       |

|         |                                                       |                |    |             |             |                                                                                                                                     |
|---------|-------------------------------------------------------|----------------|----|-------------|-------------|-------------------------------------------------------------------------------------------------------------------------------------|
| PRKACG  | Protein Kinase CAMP-Activated Catalytic Subunit Gamma | Protein Coding | 53 | GC09M069046 | 3.832050562 | <a href="https://www.genecards.org/cgi-bin/carddisp.pl?gene=PRKACG">https://www.genecards.org/cgi-bin/carddisp.pl?gene=PRKACG</a>   |
| ACSL5   | Acyl-CoA Synthetase Long Chain Family Member 5        | Protein Coding | 49 | GC10P112374 | 3.831627607 | <a href="https://www.genecards.org/cgi-bin/carddisp.pl?gene=ACSL5">https://www.genecards.org/cgi-bin/carddisp.pl?gene=ACSL5</a>     |
| PNMT    | Phenylethanolamine N-Methyltransferase                | Protein Coding | 50 | GC17P039667 | 3.831362724 | <a href="https://www.genecards.org/cgi-bin/carddisp.pl?gene=PNMT">https://www.genecards.org/cgi-bin/carddisp.pl?gene=PNMT</a>       |
| CGB5    | Chorionic Gonadotropin Subunit Beta 5                 | Protein Coding | 37 | GC19P049043 | 3.828410149 | <a href="https://www.genecards.org/cgi-bin/carddisp.pl?gene=CGB5">https://www.genecards.org/cgi-bin/carddisp.pl?gene=CGB5</a>       |
| GUK1    | Guanylate Kinase 1                                    | Protein Coding | 47 | GC01P228139 | 3.826385498 | <a href="https://www.genecards.org/cgi-bin/carddisp.pl?gene=GUK1">https://www.genecards.org/cgi-bin/carddisp.pl?gene=GUK1</a>       |
| AGMO    | Alkylglycerol Monooxygenase                           | Protein Coding | 42 | GC07M015117 | 3.824967861 | <a href="https://www.genecards.org/cgi-bin/carddisp.pl?gene=AGMO">https://www.genecards.org/cgi-bin/carddisp.pl?gene=AGMO</a>       |
| SYK     | Spleen Associated Tyrosine Kinase                     | Protein Coding | 56 | GC09P092704 | 3.822367668 | <a href="https://www.genecards.org/cgi-bin/carddisp.pl?gene=SYK">https://www.genecards.org/cgi-bin/carddisp.pl?gene=SYK</a>         |
| CERS6   | Ceramide Synthase 6                                   | Protein Coding | 47 | GC02P168455 | 3.821056366 | <a href="https://www.genecards.org/cgi-bin/carddisp.pl?gene=CERS6">https://www.genecards.org/cgi-bin/carddisp.pl?gene=CERS6</a>     |
| SEC14L2 | SEC14 Like Lipid Binding 2                            | Protein Coding | 46 | GC22P030396 | 3.81583333  | <a href="https://www.genecards.org/cgi-bin/carddisp.pl?gene=SEC14L2">https://www.genecards.org/cgi-bin/carddisp.pl?gene=SEC14L2</a> |
| SORT1   | Sortilin 1                                            | Protein Coding | 51 | GC01M109310 | 3.81338954  | <a href="https://www.genecards.org/cgi-bin/carddisp.pl?gene=SORT1">https://www.genecards.org/cgi-bin/carddisp.pl?gene=SORT1</a>     |
| RARB    | Retinoic Acid Receptor Beta                           | Protein Coding | 56 | GC03P024689 | 3.813275337 | <a href="https://www.genecards.org/cgi-bin/carddisp.pl?gene=RARB">https://www.genecards.org/cgi-bin/carddisp.pl?gene=RARB</a>       |
| LRP8    | LDL Receptor Related Protein 8                        | Protein Coding | 50 | GC01M053243 | 3.812624216 | <a href="https://www.genecards.org/cgi-bin/carddisp.pl?gene=LRP8">https://www.genecards.org/cgi-bin/carddisp.pl?gene=LRP8</a>       |
| ITGB1   | Integrin Subunit Beta 1                               | Protein Coding | 57 | GC10M033645 | 3.809351444 | <a href="https://www.genecards.org/cgi-bin/carddisp.pl?gene=ITGB1">https://www.genecards.org/cgi-bin/carddisp.pl?gene=ITGB1</a>     |
| SRY     | Sex Determining Region Y                              | Protein Coding | 42 | GC0YM002698 | 3.805636406 | <a href="https://www.genecards.org/cgi-bin/carddisp.pl?gene=SRY">https://www.genecards.org/cgi-bin/carddisp.pl?gene=SRY</a>         |
| MGST1   | Microsomal Glutathione S-Transferase 1                | Protein Coding | 47 | GC12P016347 | 3.804653168 | <a href="https://www.genecards.org/cgi-bin/carddisp.pl?gene=MGST1">https://www.genecards.org/cgi-bin/carddisp.pl?gene=MGST1</a>     |

|         |                                                     |                |    |             |             |                                                                                                                                     |
|---------|-----------------------------------------------------|----------------|----|-------------|-------------|-------------------------------------------------------------------------------------------------------------------------------------|
| CANX    | Calnexin                                            | Protein Coding | 51 | GC05P179678 | 3.798567057 | <a href="https://www.genecards.org/cgi-bin/carddisp.pl?gene=CANX">https://www.genecards.org/cgi-bin/carddisp.pl?gene=CANX</a>       |
| PLA2G2E | Phospholipase A2 Group IIE                          | Protein Coding | 43 | GC01M019920 | 3.789566994 | <a href="https://www.genecards.org/cgi-bin/carddisp.pl?gene=PLA2G2E">https://www.genecards.org/cgi-bin/carddisp.pl?gene=PLA2G2E</a> |
| SULT1B1 | Sulfotransferase Family 1B Member 1                 | Protein Coding | 47 | GC04M069721 | 3.787377834 | <a href="https://www.genecards.org/cgi-bin/carddisp.pl?gene=SULT1B1">https://www.genecards.org/cgi-bin/carddisp.pl?gene=SULT1B1</a> |
| NR4A2   | Nuclear Receptor Subfamily 4 Group A Member 2       | Protein Coding | 53 | GC02M156324 | 3.786156893 | <a href="https://www.genecards.org/cgi-bin/carddisp.pl?gene=NR4A2">https://www.genecards.org/cgi-bin/carddisp.pl?gene=NR4A2</a>     |
| SMN2    | Survival Of Motor Neuron 2, Centromeric             | Protein Coding | 46 | GC05P070049 | 3.781511784 | <a href="https://www.genecards.org/cgi-bin/carddisp.pl?gene=SMN2">https://www.genecards.org/cgi-bin/carddisp.pl?gene=SMN2</a>       |
| BTBD10  | BTB Domain Containing 10                            | Protein Coding | 43 | GC11M013387 | 3.778814316 | <a href="https://www.genecards.org/cgi-bin/carddisp.pl?gene=BTBD10">https://www.genecards.org/cgi-bin/carddisp.pl?gene=BTBD10</a>   |
| ADAR    | Adenosine Deaminase RNA Specific                    | Protein Coding | 52 | GC01M154599 | 3.766012192 | <a href="https://www.genecards.org/cgi-bin/carddisp.pl?gene=ADAR">https://www.genecards.org/cgi-bin/carddisp.pl?gene=ADAR</a>       |
| CTSK    | Cathepsin K                                         | Protein Coding | 57 | GC01M152758 | 3.764894962 | <a href="https://www.genecards.org/cgi-bin/carddisp.pl?gene=CTSK">https://www.genecards.org/cgi-bin/carddisp.pl?gene=CTSK</a>       |
| TRAF6   | TNF Receptor Associated Factor 6                    | Protein Coding | 52 | GC11M036467 | 3.761487722 | <a href="https://www.genecards.org/cgi-bin/carddisp.pl?gene=TRAF6">https://www.genecards.org/cgi-bin/carddisp.pl?gene=TRAF6</a>     |
| CNR2    | Cannabinoid Receptor 2                              | Protein Coding | 51 | GC01M023870 | 3.759726048 | <a href="https://www.genecards.org/cgi-bin/carddisp.pl?gene=CNR2">https://www.genecards.org/cgi-bin/carddisp.pl?gene=CNR2</a>       |
| DGKA    | Diacylglycerol Kinase Alpha                         | Protein Coding | 51 | GC12P055927 | 3.755910397 | <a href="https://www.genecards.org/cgi-bin/carddisp.pl?gene=DGKA">https://www.genecards.org/cgi-bin/carddisp.pl?gene=DGKA</a>       |
| CYP3A43 | Cytochrome P450 Family 3 Subfamily A Member 43      | Protein Coding | 46 | GC07P099833 | 3.754785776 | <a href="https://www.genecards.org/cgi-bin/carddisp.pl?gene=CYP3A43">https://www.genecards.org/cgi-bin/carddisp.pl?gene=CYP3A43</a> |
| DRD4    | Dopamine Receptor D4                                | Protein Coding | 52 | GC11P002096 | 3.753496647 | <a href="https://www.genecards.org/cgi-bin/carddisp.pl?gene=DRD4">https://www.genecards.org/cgi-bin/carddisp.pl?gene=DRD4</a>       |
| PCSK2   | Proprotein Convertase Subtilisin/Kexin Type 2       | Protein Coding | 50 | GC20P017226 | 3.745601177 | <a href="https://www.genecards.org/cgi-bin/carddisp.pl?gene=PCSK2">https://www.genecards.org/cgi-bin/carddisp.pl?gene=PCSK2</a>     |
| STAT5B  | Signal Transducer And Activator Of Transcription 5B | Protein Coding | 56 | GC17M042199 | 3.744742155 | <a href="https://www.genecards.org/cgi-bin/carddisp.pl?gene=STAT5B">https://www.genecards.org/cgi-bin/carddisp.pl?gene=STAT5B</a>   |

|         |                                                            |                |    |             |             |                                                                                                                                     |
|---------|------------------------------------------------------------|----------------|----|-------------|-------------|-------------------------------------------------------------------------------------------------------------------------------------|
| TJP2    | Tight Junction Protein 2                                   | Protein Coding | 51 | GC09P069121 | 3.744441032 | <a href="https://www.genecards.org/cgi-bin/carddisp.pl?gene=TJP2">https://www.genecards.org/cgi-bin/carddisp.pl?gene=TJP2</a>       |
| KCNJ2   | Potassium Inwardly Rectifying Channel Subfamily J Member 2 | Protein Coding | 55 | GC17P070168 | 3.729247332 | <a href="https://www.genecards.org/cgi-bin/carddisp.pl?gene=KCNJ2">https://www.genecards.org/cgi-bin/carddisp.pl?gene=KCNJ2</a>     |
| GPAT3   | Glycerol-3-Phosphate Acyltransferase 3                     | Protein Coding | 47 | GC04P083536 | 3.729138851 | <a href="https://www.genecards.org/cgi-bin/carddisp.pl?gene=GPAT3">https://www.genecards.org/cgi-bin/carddisp.pl?gene=GPAT3</a>     |
| SIK2    | Salt Inducible Kinase 2                                    | Protein Coding | 52 | GC11P111989 | 3.725149632 | <a href="https://www.genecards.org/cgi-bin/carddisp.pl?gene=SIK2">https://www.genecards.org/cgi-bin/carddisp.pl?gene=SIK2</a>       |
| TWIST1  | Twist Family BHLH Transcription Factor 1                   | Protein Coding | 52 | GC07M019020 | 3.721744061 | <a href="https://www.genecards.org/cgi-bin/carddisp.pl?gene=TWIST1">https://www.genecards.org/cgi-bin/carddisp.pl?gene=TWIST1</a>   |
| GLRX    | Glutaredoxin                                               | Protein Coding | 50 | GC05M095752 | 3.718975544 | <a href="https://www.genecards.org/cgi-bin/carddisp.pl?gene=GLRX">https://www.genecards.org/cgi-bin/carddisp.pl?gene=GLRX</a>       |
| PAM     | Peptidylglycine Alpha-Amidating Monooxygenase              | Protein Coding | 50 | GC05P102753 | 3.717186213 | <a href="https://www.genecards.org/cgi-bin/carddisp.pl?gene=PAM">https://www.genecards.org/cgi-bin/carddisp.pl?gene=PAM</a>         |
| SELL    | Selectin L                                                 | Protein Coding | 50 | GC01M169690 | 3.716027021 | <a href="https://www.genecards.org/cgi-bin/carddisp.pl?gene=SELL">https://www.genecards.org/cgi-bin/carddisp.pl?gene=SELL</a>       |
| SULT4A1 | Sulfotransferase Family 4A Member 1                        | Protein Coding | 46 | GC22M043824 | 3.715360165 | <a href="https://www.genecards.org/cgi-bin/carddisp.pl?gene=SULT4A1">https://www.genecards.org/cgi-bin/carddisp.pl?gene=SULT4A1</a> |
| HNRNPD  | Heterogeneous Nuclear Ribonucleoprotein D                  | Protein Coding | 50 | GC04M082352 | 3.702080965 | <a href="https://www.genecards.org/cgi-bin/carddisp.pl?gene=HNRNPD">https://www.genecards.org/cgi-bin/carddisp.pl?gene=HNRNPD</a>   |
| CERS2   | Ceramide Synthase 2                                        | Protein Coding | 48 | GC01M150960 | 3.701366425 | <a href="https://www.genecards.org/cgi-bin/carddisp.pl?gene=CERS2">https://www.genecards.org/cgi-bin/carddisp.pl?gene=CERS2</a>     |
| GPAT2   | Glycerol-3-Phosphate Acyltransferase 2, Mitochondrial      | Protein Coding | 39 | GC02M098745 | 3.699226379 | <a href="https://www.genecards.org/cgi-bin/carddisp.pl?gene=GPAT2">https://www.genecards.org/cgi-bin/carddisp.pl?gene=GPAT2</a>     |
| CASP1   | Caspase 1                                                  | Protein Coding | 56 | GC11M105025 | 3.698204041 | <a href="https://www.genecards.org/cgi-bin/carddisp.pl?gene=CASP1">https://www.genecards.org/cgi-bin/carddisp.pl?gene=CASP1</a>     |
| CAV2    | Caveolin 2                                                 | Protein Coding | 50 | GC07P116287 | 3.696254253 | <a href="https://www.genecards.org/cgi-bin/carddisp.pl?gene=CAV2">https://www.genecards.org/cgi-bin/carddisp.pl?gene=CAV2</a>       |
| PSAT1   | Phosphoserine Aminotransferase 1                           | Protein Coding | 54 | GC09P078297 | 3.693089008 | <a href="https://www.genecards.org/cgi-bin/carddisp.pl?gene=PSAT1">https://www.genecards.org/cgi-bin/carddisp.pl?gene=PSAT1</a>     |

|          |                                                                  |                |    |             |             |                                                                                                                                       |
|----------|------------------------------------------------------------------|----------------|----|-------------|-------------|---------------------------------------------------------------------------------------------------------------------------------------|
| TGM2     | Transglutaminase 2                                               | Protein Coding | 54 | GC20M038127 | 3.692184448 | <a href="https://www.genecards.org/cgi-bin/carddisp.pl?gene=TGM2">https://www.genecards.org/cgi-bin/carddisp.pl?gene=TGM2</a>         |
| TLR3     | Toll Like Receptor 3                                             | Protein Coding | 58 | GC04P186059 | 3.689142704 | <a href="https://www.genecards.org/cgi-bin/carddisp.pl?gene=TLR3">https://www.genecards.org/cgi-bin/carddisp.pl?gene=TLR3</a>         |
| WARS1    | Tryptophanyl-TRNA Synthetase 1                                   | Protein Coding | 52 | GC14M103181 | 3.687915325 | <a href="https://www.genecards.org/cgi-bin/carddisp.pl?gene=WARS1">https://www.genecards.org/cgi-bin/carddisp.pl?gene=WARS1</a>       |
| GSTA4    | Glutathione S-Transferase Alpha 4                                | Protein Coding | 47 | GC06M052977 | 3.68756938  | <a href="https://www.genecards.org/cgi-bin/carddisp.pl?gene=GSTA4">https://www.genecards.org/cgi-bin/carddisp.pl?gene=GSTA4</a>       |
| HSD17B12 | Hydroxysteroid 17-Beta Dehydrogenase 12                          | Protein Coding | 46 | GC11P043652 | 3.686990738 | <a href="https://www.genecards.org/cgi-bin/carddisp.pl?gene=HSD17B12">https://www.genecards.org/cgi-bin/carddisp.pl?gene=HSD17B12</a> |
| LIPF     | Lipase F, Gastric Type                                           | Protein Coding | 49 | GC10P088664 | 3.683813572 | <a href="https://www.genecards.org/cgi-bin/carddisp.pl?gene=LIPF">https://www.genecards.org/cgi-bin/carddisp.pl?gene=LIPF</a>         |
| SCD5     | Stearoyl-CoA Desaturase 5                                        | Protein Coding | 48 | GC04M082629 | 3.682816505 | <a href="https://www.genecards.org/cgi-bin/carddisp.pl?gene=SCD5">https://www.genecards.org/cgi-bin/carddisp.pl?gene=SCD5</a>         |
| PTGES3   | Prostaglandin E Synthase 3                                       | Protein Coding | 51 | GC12M057070 | 3.682389259 | <a href="https://www.genecards.org/cgi-bin/carddisp.pl?gene=PTGES3">https://www.genecards.org/cgi-bin/carddisp.pl?gene=PTGES3</a>     |
| AZIN2    | Antizyme Inhibitor 2                                             | Protein Coding | 47 | GC01P033081 | 3.678210258 | <a href="https://www.genecards.org/cgi-bin/carddisp.pl?gene=AZIN2">https://www.genecards.org/cgi-bin/carddisp.pl?gene=AZIN2</a>       |
| BMP4     | Bone Morphogenetic Protein 4                                     | Protein Coding | 55 | GC14M053949 | 3.675657272 | <a href="https://www.genecards.org/cgi-bin/carddisp.pl?gene=BMP4">https://www.genecards.org/cgi-bin/carddisp.pl?gene=BMP4</a>         |
| PLCB4    | Phospholipase C Beta 4                                           | Protein Coding | 52 | GC20P009024 | 3.674196005 | <a href="https://www.genecards.org/cgi-bin/carddisp.pl?gene=PLCB4">https://www.genecards.org/cgi-bin/carddisp.pl?gene=PLCB4</a>       |
| MBL2     | Mannose Binding Lectin 2                                         | Protein Coding | 53 | GC10M052760 | 3.673710585 | <a href="https://www.genecards.org/cgi-bin/carddisp.pl?gene=MBL2">https://www.genecards.org/cgi-bin/carddisp.pl?gene=MBL2</a>         |
| AGTR2    | Angiotensin II Receptor Type 2                                   | Protein Coding | 51 | GC0XP116170 | 3.668705702 | <a href="https://www.genecards.org/cgi-bin/carddisp.pl?gene=AGTR2">https://www.genecards.org/cgi-bin/carddisp.pl?gene=AGTR2</a>       |
| RPL11    | Ribosomal Protein L11                                            | Protein Coding | 55 | GC01P023691 | 3.668517351 | <a href="https://www.genecards.org/cgi-bin/carddisp.pl?gene=RPL11">https://www.genecards.org/cgi-bin/carddisp.pl?gene=RPL11</a>       |
| TRPV1    | Transient Receptor Potential Cation Channel Subfamily V Member 1 | Protein Coding | 55 | GC17M003565 | 3.657725573 | <a href="https://www.genecards.org/cgi-bin/carddisp.pl?gene=TRPV1">https://www.genecards.org/cgi-bin/carddisp.pl?gene=TRPV1</a>       |

|          |                                                               |                |    |             |             |                                                                                                                                       |
|----------|---------------------------------------------------------------|----------------|----|-------------|-------------|---------------------------------------------------------------------------------------------------------------------------------------|
| CNTF     | Ciliary Neurotrophic Factor                                   | Protein Coding | 47 | GC11P058622 | 3.656933069 | <a href="https://www.genecards.org/cgi-bin/carddisp.pl?gene=CNTF">https://www.genecards.org/cgi-bin/carddisp.pl?gene=CNTF</a>         |
| IL2RA    | Interleukin 2 Receptor Subunit Alpha                          | Protein Coding | 57 | GC10M006010 | 3.654792786 | <a href="https://www.genecards.org/cgi-bin/carddisp.pl?gene=IL2RA">https://www.genecards.org/cgi-bin/carddisp.pl?gene=IL2RA</a>       |
| ACSM4    | Acyl-CoA Synthetase Medium Chain Family Member 4              | Protein Coding | 38 | GC12P007304 | 3.649587154 | <a href="https://www.genecards.org/cgi-bin/carddisp.pl?gene=ACSM4">https://www.genecards.org/cgi-bin/carddisp.pl?gene=ACSM4</a>       |
| EIF4EBP1 | Eukaryotic Translation Initiation Factor 4E Binding Protein 1 | Protein Coding | 53 | GC08P038607 | 3.646658659 | <a href="https://www.genecards.org/cgi-bin/carddisp.pl?gene=EIF4EBP1">https://www.genecards.org/cgi-bin/carddisp.pl?gene=EIF4EBP1</a> |
| BIRC5    | Baculoviral IAP Repeat Containing 5                           | Protein Coding | 52 | GC17P078214 | 3.645214796 | <a href="https://www.genecards.org/cgi-bin/carddisp.pl?gene=BIRC5">https://www.genecards.org/cgi-bin/carddisp.pl?gene=BIRC5</a>       |
| CALM1    | Calmodulin 1                                                  | Protein Coding | 52 | GC14P090396 | 3.641564131 | <a href="https://www.genecards.org/cgi-bin/carddisp.pl?gene=CALM1">https://www.genecards.org/cgi-bin/carddisp.pl?gene=CALM1</a>       |
| ETV6     | ETS Variant Transcription Factor 6                            | Protein Coding | 52 | GC12P011649 | 3.639504433 | <a href="https://www.genecards.org/cgi-bin/carddisp.pl?gene=ETV6">https://www.genecards.org/cgi-bin/carddisp.pl?gene=ETV6</a>         |
| BMPR2    | Bone Morphogenetic Protein Receptor Type 2                    | Protein Coding | 57 | GC02P202376 | 3.636691809 | <a href="https://www.genecards.org/cgi-bin/carddisp.pl?gene=BMPR2">https://www.genecards.org/cgi-bin/carddisp.pl?gene=BMPR2</a>       |
| IL1RAPL2 | Interleukin 1 Receptor Accessory Protein Like 2               | Protein Coding | 46 | GC0XP104566 | 3.632210255 | <a href="https://www.genecards.org/cgi-bin/carddisp.pl?gene=IL1RAPL2">https://www.genecards.org/cgi-bin/carddisp.pl?gene=IL1RAPL2</a> |
| SLC6A2   | Solute Carrier Family 6 Member 2                              | Protein Coding | 54 | GC16P055656 | 3.631602526 | <a href="https://www.genecards.org/cgi-bin/carddisp.pl?gene=SLC6A2">https://www.genecards.org/cgi-bin/carddisp.pl?gene=SLC6A2</a>     |
| PCBP2    | Poly(RC) Binding Protein 2                                    | Protein Coding | 48 | GC12P053452 | 3.630653381 | <a href="https://www.genecards.org/cgi-bin/carddisp.pl?gene=PCBP2">https://www.genecards.org/cgi-bin/carddisp.pl?gene=PCBP2</a>       |
| PIK3R2   | Phosphoinositide-3-Kinase Regulatory Subunit 2                | Protein Coding | 56 | GC19P018153 | 3.626128674 | <a href="https://www.genecards.org/cgi-bin/carddisp.pl?gene=PIK3R2">https://www.genecards.org/cgi-bin/carddisp.pl?gene=PIK3R2</a>     |
| ACOT2    | Acyl-CoA Thioesterase 2                                       | Protein Coding | 44 | GC14P073567 | 3.625527143 | <a href="https://www.genecards.org/cgi-bin/carddisp.pl?gene=ACOT2">https://www.genecards.org/cgi-bin/carddisp.pl?gene=ACOT2</a>       |
| ACP3     | Acid Phosphatase 3                                            | Protein Coding | 50 | GC03P135034 | 3.619726658 | <a href="https://www.genecards.org/cgi-bin/carddisp.pl?gene=ACP3">https://www.genecards.org/cgi-bin/carddisp.pl?gene=ACP3</a>         |
| C4A      | Complement C4A (Rodgers Blood Group)                          | Protein Coding | 50 | GC06P092175 | 3.611579657 | <a href="https://www.genecards.org/cgi-bin/carddisp.pl?gene=C4A">https://www.genecards.org/cgi-bin/carddisp.pl?gene=C4A</a>           |



|         |                                                                           |                |    |             |             |                                                                                                                                     |
|---------|---------------------------------------------------------------------------|----------------|----|-------------|-------------|-------------------------------------------------------------------------------------------------------------------------------------|
| GPAT4   | Glycerol-3-Phosphate Acyltransferase 4                                    | Protein Coding | 44 | GC08P041577 | 3.610387325 | <a href="https://www.genecards.org/cgi-bin/carddisp.pl?gene=GPAT4">https://www.genecards.org/cgi-bin/carddisp.pl?gene=GPAT4</a>     |
| THPO    | Thrombopoietin                                                            | Protein Coding | 50 | GC03M184371 | 3.601413965 | <a href="https://www.genecards.org/cgi-bin/carddisp.pl?gene=THPO">https://www.genecards.org/cgi-bin/carddisp.pl?gene=THPO</a>       |
| HSD17B8 | Hydroxysteroid 17-Beta Dehydrogenase 8                                    | Protein Coding | 46 | GC06P092209 | 3.600556135 | <a href="https://www.genecards.org/cgi-bin/carddisp.pl?gene=HSD17B8">https://www.genecards.org/cgi-bin/carddisp.pl?gene=HSD17B8</a> |
| PGAM1   | Phosphoglycerate Mutase 1                                                 | Protein Coding | 51 | GC10P097426 | 3.594974279 | <a href="https://www.genecards.org/cgi-bin/carddisp.pl?gene=PGAM1">https://www.genecards.org/cgi-bin/carddisp.pl?gene=PGAM1</a>     |
| ANXA1   | Annexin A1                                                                | Protein Coding | 54 | GC09P073151 | 3.584882736 | <a href="https://www.genecards.org/cgi-bin/carddisp.pl?gene=ANXA1">https://www.genecards.org/cgi-bin/carddisp.pl?gene=ANXA1</a>     |
| CYP20A1 | Cytochrome P450 Family 20 Subfamily A Member 1                            | Protein Coding | 44 | GC02P203238 | 3.581699133 | <a href="https://www.genecards.org/cgi-bin/carddisp.pl?gene=CYP20A1">https://www.genecards.org/cgi-bin/carddisp.pl?gene=CYP20A1</a> |
| CD79B   | CD79b Molecule                                                            | Protein Coding | 54 | GC17M063928 | 3.581664562 | <a href="https://www.genecards.org/cgi-bin/carddisp.pl?gene=CD79B">https://www.genecards.org/cgi-bin/carddisp.pl?gene=CD79B</a>     |
| PLEK    | Pleckstrin                                                                | Protein Coding | 47 | GC02P068365 | 3.565039635 | <a href="https://www.genecards.org/cgi-bin/carddisp.pl?gene=PLEK">https://www.genecards.org/cgi-bin/carddisp.pl?gene=PLEK</a>       |
| UGT2B11 | UDP Glucuronosyltransferase Family 2 Member B11                           | Protein Coding | 44 | GC04M069199 | 3.564004183 | <a href="https://www.genecards.org/cgi-bin/carddisp.pl?gene=UGT2B11">https://www.genecards.org/cgi-bin/carddisp.pl?gene=UGT2B11</a> |
| NOX4    | NADPH Oxidase 4                                                           | Protein Coding | 50 | GC11M089324 | 3.563686609 | <a href="https://www.genecards.org/cgi-bin/carddisp.pl?gene=NOX4">https://www.genecards.org/cgi-bin/carddisp.pl?gene=NOX4</a>       |
| ATP2A3  | ATPase Sarcoplasmic/Endoplasmic Reticulum Ca <sup>2+</sup> Transporting 3 | Protein Coding | 52 | GC17M003923 | 3.559276819 | <a href="https://www.genecards.org/cgi-bin/carddisp.pl?gene=ATP2A3">https://www.genecards.org/cgi-bin/carddisp.pl?gene=ATP2A3</a>   |
| SOCS1   | Suppressor Of Cytokine Signaling 1                                        | Protein Coding | 52 | GC16M012467 | 3.558186293 | <a href="https://www.genecards.org/cgi-bin/carddisp.pl?gene=SOCS1">https://www.genecards.org/cgi-bin/carddisp.pl?gene=SOCS1</a>     |
| TRH     | Thyrotropin Releasing Hormone                                             | Protein Coding | 48 | GC03P129974 | 3.556975603 | <a href="https://www.genecards.org/cgi-bin/carddisp.pl?gene=TRH">https://www.genecards.org/cgi-bin/carddisp.pl?gene=TRH</a>         |
| CA1     | Carbonic Anhydrase 1                                                      | Protein Coding | 54 | GC08M085327 | 3.556869507 | <a href="https://www.genecards.org/cgi-bin/carddisp.pl?gene=CA1">https://www.genecards.org/cgi-bin/carddisp.pl?gene=CA1</a>         |
| NR4A3   | Nuclear Receptor Subfamily 4 Group A Member 3                             | Protein Coding | 49 | GC09P099821 | 3.555757046 | <a href="https://www.genecards.org/cgi-bin/carddisp.pl?gene=NR4A3">https://www.genecards.org/cgi-bin/carddisp.pl?gene=NR4A3</a>     |

|         |                                                      |                |    |             |             |                                                                                                                                     |
|---------|------------------------------------------------------|----------------|----|-------------|-------------|-------------------------------------------------------------------------------------------------------------------------------------|
| PRDX6   | Peroxiredoxin 6                                      | Protein Coding | 53 | GC01P173477 | 3.552488565 | <a href="https://www.genecards.org/cgi-bin/carddisp.pl?gene=PRDX6">https://www.genecards.org/cgi-bin/carddisp.pl?gene=PRDX6</a>     |
| SH2B1   | SH2B Adaptor Protein 1                               | Protein Coding | 48 | GC16P042648 | 3.546960115 | <a href="https://www.genecards.org/cgi-bin/carddisp.pl?gene=SH2B1">https://www.genecards.org/cgi-bin/carddisp.pl?gene=SH2B1</a>     |
| GRIK2   | Glutamate Ionotropic Receptor Kainate Type Subunit 2 | Protein Coding | 56 | GC06P100962 | 3.546540976 | <a href="https://www.genecards.org/cgi-bin/carddisp.pl?gene=GRIK2">https://www.genecards.org/cgi-bin/carddisp.pl?gene=GRIK2</a>     |
| SPARC   | Secreted Protein Acidic And Cysteine Rich            | Protein Coding | 56 | GC05M151661 | 3.546322346 | <a href="https://www.genecards.org/cgi-bin/carddisp.pl?gene=SPARC">https://www.genecards.org/cgi-bin/carddisp.pl?gene=SPARC</a>     |
| TGFB2   | Transforming Growth Factor Beta 2                    | Protein Coding | 58 | GC01P218345 | 3.546247482 | <a href="https://www.genecards.org/cgi-bin/carddisp.pl?gene=TGFB2">https://www.genecards.org/cgi-bin/carddisp.pl?gene=TGFB2</a>     |
| SCT     | Secretin                                             | Protein Coding | 39 | GC11M000626 | 3.542740107 | <a href="https://www.genecards.org/cgi-bin/carddisp.pl?gene=SCT">https://www.genecards.org/cgi-bin/carddisp.pl?gene=SCT</a>         |
| ACSM6   | Acyl-CoA Synthetase Medium Chain Family Member 6     | Protein Coding | 37 | GC10P095194 | 3.540477037 | <a href="https://www.genecards.org/cgi-bin/carddisp.pl?gene=ACSM6">https://www.genecards.org/cgi-bin/carddisp.pl?gene=ACSM6</a>     |
| STAT5A  | Signal Transducer And Activator Of Transcription 5A  | Protein Coding | 55 | GC17P042287 | 3.540235758 | <a href="https://www.genecards.org/cgi-bin/carddisp.pl?gene=STAT5A">https://www.genecards.org/cgi-bin/carddisp.pl?gene=STAT5A</a>   |
| ELOVL6  | ELOVL Fatty Acid Elongase 6                          | Protein Coding | 48 | GC04M110045 | 3.538087368 | <a href="https://www.genecards.org/cgi-bin/carddisp.pl?gene=ELOVL6">https://www.genecards.org/cgi-bin/carddisp.pl?gene=ELOVL6</a>   |
| TBXA2R  | Thromboxane A2 Receptor                              | Protein Coding | 56 | GC19M003594 | 3.5368433   | <a href="https://www.genecards.org/cgi-bin/carddisp.pl?gene=TBXA2R">https://www.genecards.org/cgi-bin/carddisp.pl?gene=TBXA2R</a>   |
| LYN     | LYN Proto-Oncogene, Src Family Tyrosine Kinase       | Protein Coding | 55 | GC08P055879 | 3.53446126  | <a href="https://www.genecards.org/cgi-bin/carddisp.pl?gene=LYN">https://www.genecards.org/cgi-bin/carddisp.pl?gene=LYN</a>         |
| AKR1B15 | Aldo-Keto Reductase Family 1 Member B15              | Protein Coding | 37 | GC07P134549 | 3.529265165 | <a href="https://www.genecards.org/cgi-bin/carddisp.pl?gene=AKR1B15">https://www.genecards.org/cgi-bin/carddisp.pl?gene=AKR1B15</a> |
| F8      | Coagulation Factor VIII                              | Protein Coding | 54 | GC0XM154835 | 3.527348995 | <a href="https://www.genecards.org/cgi-bin/carddisp.pl?gene=F8">https://www.genecards.org/cgi-bin/carddisp.pl?gene=F8</a>           |
| LGALS1  | Galectin 1                                           | Protein Coding | 50 | GC22P037675 | 3.524164677 | <a href="https://www.genecards.org/cgi-bin/carddisp.pl?gene=LGALS1">https://www.genecards.org/cgi-bin/carddisp.pl?gene=LGALS1</a>   |
| UGT2B28 | UDP Glucuronosyltransferase Family 2 Member B28      | Protein Coding | 45 | GC04P069280 | 3.52409482  | <a href="https://www.genecards.org/cgi-bin/carddisp.pl?gene=UGT2B28">https://www.genecards.org/cgi-bin/carddisp.pl?gene=UGT2B28</a> |

|         |                                               |                |    |             |             |                                                                                                                                     |
|---------|-----------------------------------------------|----------------|----|-------------|-------------|-------------------------------------------------------------------------------------------------------------------------------------|
| SLC27A5 | Solute Carrier Family 27 Member 5             | Protein Coding | 48 | GC19M058479 | 3.523803711 | <a href="https://www.genecards.org/cgi-bin/carddisp.pl?gene=SLC27A5">https://www.genecards.org/cgi-bin/carddisp.pl?gene=SLC27A5</a> |
| LGALS3  | Galectin 3                                    | Protein Coding | 52 | GC14P055124 | 3.522946119 | <a href="https://www.genecards.org/cgi-bin/carddisp.pl?gene=LGALS3">https://www.genecards.org/cgi-bin/carddisp.pl?gene=LGALS3</a>   |
| EEF2    | Eukaryotic Translation Elongation Factor 2    | Protein Coding | 55 | GC19M003976 | 3.522862434 | <a href="https://www.genecards.org/cgi-bin/carddisp.pl?gene=EEF2">https://www.genecards.org/cgi-bin/carddisp.pl?gene=EEF2</a>       |
| CGA     | Glycoprotein Hormones, Alpha Polypeptide      | Protein Coding | 51 | GC06M087085 | 3.522000551 | <a href="https://www.genecards.org/cgi-bin/carddisp.pl?gene=CGA">https://www.genecards.org/cgi-bin/carddisp.pl?gene=CGA</a>         |
| HAO1    | Hydroxyacid Oxidase 1                         | Protein Coding | 48 | GC20M008508 | 3.519673824 | <a href="https://www.genecards.org/cgi-bin/carddisp.pl?gene=HAO1">https://www.genecards.org/cgi-bin/carddisp.pl?gene=HAO1</a>       |
| CD34    | CD34 Molecule                                 | Protein Coding | 52 | GC01M207880 | 3.518568277 | <a href="https://www.genecards.org/cgi-bin/carddisp.pl?gene=CD34">https://www.genecards.org/cgi-bin/carddisp.pl?gene=CD34</a>       |
| TOP1    | DNA Topoisomerase I                           | Protein Coding | 55 | GC20P041028 | 3.516348362 | <a href="https://www.genecards.org/cgi-bin/carddisp.pl?gene=TOP1">https://www.genecards.org/cgi-bin/carddisp.pl?gene=TOP1</a>       |
| PSMC6   | Proteasome 26S Subunit, ATPase 6              | Protein Coding | 46 | GC14P052707 | 3.516238689 | <a href="https://www.genecards.org/cgi-bin/carddisp.pl?gene=PSMC6">https://www.genecards.org/cgi-bin/carddisp.pl?gene=PSMC6</a>     |
| HAS2    | Hyaluronan Synthase 2                         | Protein Coding | 47 | GC08M121594 | 3.513864279 | <a href="https://www.genecards.org/cgi-bin/carddisp.pl?gene=HAS2">https://www.genecards.org/cgi-bin/carddisp.pl?gene=HAS2</a>       |
| HSPA1A  | Heat Shock Protein Family A (Hsp70) Member 1A | Protein Coding | 53 | GC06P092171 | 3.513021469 | <a href="https://www.genecards.org/cgi-bin/carddisp.pl?gene=HSPA1A">https://www.genecards.org/cgi-bin/carddisp.pl?gene=HSPA1A</a>   |
| DLK1    | Delta Like Non-Canonical Notch Ligand 1       | Protein Coding | 51 | GC14P110708 | 3.512380123 | <a href="https://www.genecards.org/cgi-bin/carddisp.pl?gene=DLK1">https://www.genecards.org/cgi-bin/carddisp.pl?gene=DLK1</a>       |
| UBC     | Ubiquitin C                                   | Protein Coding | 49 | GC12M124911 | 3.51091814  | <a href="https://www.genecards.org/cgi-bin/carddisp.pl?gene=UBC">https://www.genecards.org/cgi-bin/carddisp.pl?gene=UBC</a>         |
| AGRN    | Agrin                                         | Protein Coding | 52 | GC01P001020 | 3.509435892 | <a href="https://www.genecards.org/cgi-bin/carddisp.pl?gene=AGRN">https://www.genecards.org/cgi-bin/carddisp.pl?gene=AGRN</a>       |
| CA8     | Carbonic Anhydrase 8                          | Protein Coding | 53 | GC08M060187 | 3.495261669 | <a href="https://www.genecards.org/cgi-bin/carddisp.pl?gene=CA8">https://www.genecards.org/cgi-bin/carddisp.pl?gene=CA8</a>         |
| HNRNPU  | Heterogeneous Nuclear Ribonucleoprotein U     | Protein Coding | 50 | GC01M244844 | 3.492166042 | <a href="https://www.genecards.org/cgi-bin/carddisp.pl?gene=HNRNPU">https://www.genecards.org/cgi-bin/carddisp.pl?gene=HNRNPU</a>   |

|         |                                                      |                |    |             |             |                                                                                                                                     |
|---------|------------------------------------------------------|----------------|----|-------------|-------------|-------------------------------------------------------------------------------------------------------------------------------------|
| TOP2A   | DNA Topoisomerase II Alpha                           | Protein Coding | 57 | GC17M040388 | 3.486743212 | <a href="https://www.genecards.org/cgi-bin/carddisp.pl?gene=TOP2A">https://www.genecards.org/cgi-bin/carddisp.pl?gene=TOP2A</a>     |
| TNFSF10 | TNF Superfamily Member 10                            | Protein Coding | 51 | GC03M172505 | 3.47996521  | <a href="https://www.genecards.org/cgi-bin/carddisp.pl?gene=TNFSF10">https://www.genecards.org/cgi-bin/carddisp.pl?gene=TNFSF10</a> |
| INPP5J  | Inositol Polyphosphate-5-Phosphatase J               | Protein Coding | 48 | GC22P044897 | 3.474000692 | <a href="https://www.genecards.org/cgi-bin/carddisp.pl?gene=INPP5J">https://www.genecards.org/cgi-bin/carddisp.pl?gene=INPP5J</a>   |
| SLC22A1 | Solute Carrier Family 22 Member 1                    | Protein Coding | 51 | GC06P160121 | 3.473587513 | <a href="https://www.genecards.org/cgi-bin/carddisp.pl?gene=SLC22A1">https://www.genecards.org/cgi-bin/carddisp.pl?gene=SLC22A1</a> |
| HMGB1   | High Mobility Group Box 1                            | Protein Coding | 54 | GC13M030456 | 3.468208075 | <a href="https://www.genecards.org/cgi-bin/carddisp.pl?gene=HMGB1">https://www.genecards.org/cgi-bin/carddisp.pl?gene=HMGB1</a>     |
| MYH9    | Myosin Heavy Chain 9                                 | Protein Coding | 55 | GC22M036281 | 3.46468854  | <a href="https://www.genecards.org/cgi-bin/carddisp.pl?gene=MYH9">https://www.genecards.org/cgi-bin/carddisp.pl?gene=MYH9</a>       |
| OLR1    | Oxidized Low Density Lipoprotein Receptor 1          | Protein Coding | 50 | GC12M022629 | 3.458401203 | <a href="https://www.genecards.org/cgi-bin/carddisp.pl?gene=OLR1">https://www.genecards.org/cgi-bin/carddisp.pl?gene=OLR1</a>       |
| GP1BA   | Glycoprotein Ib Platelet Subunit Alpha               | Protein Coding | 54 | GC17P004932 | 3.456385374 | <a href="https://www.genecards.org/cgi-bin/carddisp.pl?gene=GP1BA">https://www.genecards.org/cgi-bin/carddisp.pl?gene=GP1BA</a>     |
| GRIK1   | Glutamate Ionotropic Receptor Kainate Type Subunit 1 | Protein Coding | 53 | GC21M029536 | 3.454291821 | <a href="https://www.genecards.org/cgi-bin/carddisp.pl?gene=GRIK1">https://www.genecards.org/cgi-bin/carddisp.pl?gene=GRIK1</a>     |
| ERBB4   | Erb-B2 Receptor Tyrosine Kinase 4                    | Protein Coding | 61 | GC02M211375 | 3.447304487 | <a href="https://www.genecards.org/cgi-bin/carddisp.pl?gene=ERBB4">https://www.genecards.org/cgi-bin/carddisp.pl?gene=ERBB4</a>     |
| NFKB2   | Nuclear Factor Kappa B Subunit 2                     | Protein Coding | 59 | GC10P102394 | 3.43983674  | <a href="https://www.genecards.org/cgi-bin/carddisp.pl?gene=NFKB2">https://www.genecards.org/cgi-bin/carddisp.pl?gene=NFKB2</a>     |
| ELOVL4  | ELOVL Fatty Acid Elongase 4                          | Protein Coding | 52 | GC06M079914 | 3.439374208 | <a href="https://www.genecards.org/cgi-bin/carddisp.pl?gene=ELOVL4">https://www.genecards.org/cgi-bin/carddisp.pl?gene=ELOVL4</a>   |
| CD28    | CD28 Molecule                                        | Protein Coding | 55 | GC02P203706 | 3.433174372 | <a href="https://www.genecards.org/cgi-bin/carddisp.pl?gene=CD28">https://www.genecards.org/cgi-bin/carddisp.pl?gene=CD28</a>       |
| THEM5   | Thioesterase Superfamily Member 5                    | Protein Coding | 41 | GC01M152803 | 3.431970835 | <a href="https://www.genecards.org/cgi-bin/carddisp.pl?gene=THEM5">https://www.genecards.org/cgi-bin/carddisp.pl?gene=THEM5</a>     |
| PDZK1   | PDZ Domain Containing 1                              | Protein Coding | 47 | GC01M145670 | 3.431917667 | <a href="https://www.genecards.org/cgi-bin/carddisp.pl?gene=PDZK1">https://www.genecards.org/cgi-bin/carddisp.pl?gene=PDZK1</a>     |

|         |                                                                |                |    |             |             |                                                                                                                                     |
|---------|----------------------------------------------------------------|----------------|----|-------------|-------------|-------------------------------------------------------------------------------------------------------------------------------------|
| SLC51A  | Solute Carrier Family 51 Subunit Alpha                         | Protein Coding | 45 | GC03P196211 | 3.431206226 | <a href="https://www.genecards.org/cgi-bin/carddisp.pl?gene=SLC51A">https://www.genecards.org/cgi-bin/carddisp.pl?gene=SLC51A</a>   |
| ATF3    | Activating Transcription Factor 3                              | Protein Coding | 51 | GC01P212565 | 3.43088913  | <a href="https://www.genecards.org/cgi-bin/carddisp.pl?gene=ATF3">https://www.genecards.org/cgi-bin/carddisp.pl?gene=ATF3</a>       |
| PKD1    | Polycystin 1, Transient Receptor Potential Channel Interacting | Protein Coding | 52 | GC16M008093 | 3.430216074 | <a href="https://www.genecards.org/cgi-bin/carddisp.pl?gene=PKD1">https://www.genecards.org/cgi-bin/carddisp.pl?gene=PKD1</a>       |
| HARS1   | Histidyl-TRNA Synthetase 1                                     | Protein Coding | 51 | GC05M140673 | 3.425354958 | <a href="https://www.genecards.org/cgi-bin/carddisp.pl?gene=HARS1">https://www.genecards.org/cgi-bin/carddisp.pl?gene=HARS1</a>     |
| COL1A2  | Collagen Type 1 Alpha 2 Chain                                  | Protein Coding | 54 | GC07P094394 | 3.421122074 | <a href="https://www.genecards.org/cgi-bin/carddisp.pl?gene=COL1A2">https://www.genecards.org/cgi-bin/carddisp.pl?gene=COL1A2</a>   |
| FGB     | Fibrinogen Beta Chain                                          | Protein Coding | 53 | GC04P154604 | 3.418199778 | <a href="https://www.genecards.org/cgi-bin/carddisp.pl?gene=FGB">https://www.genecards.org/cgi-bin/carddisp.pl?gene=FGB</a>         |
| CEACAM5 | CEA Cell Adhesion Molecule 5                                   | Protein Coding | 50 | GC19P072938 | 3.411329746 | <a href="https://www.genecards.org/cgi-bin/carddisp.pl?gene=CEACAM5">https://www.genecards.org/cgi-bin/carddisp.pl?gene=CEACAM5</a> |
| CDKN1B  | Cyclin Dependent Kinase Inhibitor 1B                           | Protein Coding | 54 | GC12P023759 | 3.411257982 | <a href="https://www.genecards.org/cgi-bin/carddisp.pl?gene=CDKN1B">https://www.genecards.org/cgi-bin/carddisp.pl?gene=CDKN1B</a>   |
| PSMB8   | Proteasome 20S Subunit Beta 8                                  | Protein Coding | 56 | GC06M032840 | 3.408988237 | <a href="https://www.genecards.org/cgi-bin/carddisp.pl?gene=PSMB8">https://www.genecards.org/cgi-bin/carddisp.pl?gene=PSMB8</a>     |
| DRD1    | Dopamine Receptor D1                                           | Protein Coding | 51 | GC05M175440 | 3.405468225 | <a href="https://www.genecards.org/cgi-bin/carddisp.pl?gene=DRD1">https://www.genecards.org/cgi-bin/carddisp.pl?gene=DRD1</a>       |
| IL11    | Interleukin 11                                                 | Protein Coding | 47 | GC19M055364 | 3.404547215 | <a href="https://www.genecards.org/cgi-bin/carddisp.pl?gene=IL11">https://www.genecards.org/cgi-bin/carddisp.pl?gene=IL11</a>       |
| SLC8A1  | Solute Carrier Family 8 Member A1                              | Protein Coding | 51 | GC02M040078 | 3.403540134 | <a href="https://www.genecards.org/cgi-bin/carddisp.pl?gene=SLC8A1">https://www.genecards.org/cgi-bin/carddisp.pl?gene=SLC8A1</a>   |
| HDAC4   | Histone Deacetylase 4                                          | Protein Coding | 59 | GC02M239048 | 3.39973402  | <a href="https://www.genecards.org/cgi-bin/carddisp.pl?gene=HDAC4">https://www.genecards.org/cgi-bin/carddisp.pl?gene=HDAC4</a>     |
| PTPN2   | Protein Tyrosine Phosphatase Non-Receptor Type 2               | Protein Coding | 54 | GC18M027584 | 3.393139839 | <a href="https://www.genecards.org/cgi-bin/carddisp.pl?gene=PTPN2">https://www.genecards.org/cgi-bin/carddisp.pl?gene=PTPN2</a>     |
| MMP14   | Matrix Metalloproteinase 14                                    | Protein Coding | 57 | GC14P034667 | 3.391114712 | <a href="https://www.genecards.org/cgi-bin/carddisp.pl?gene=MMP14">https://www.genecards.org/cgi-bin/carddisp.pl?gene=MMP14</a>     |

|         |                                                     |                |    |             |             |                                                                                                                                     |
|---------|-----------------------------------------------------|----------------|----|-------------|-------------|-------------------------------------------------------------------------------------------------------------------------------------|
| YARS1   | Tyrosyl-TRNA Synthetase 1                           | Protein Coding | 50 | GC01M032776 | 3.390839338 | <a href="https://www.genecards.org/cgi-bin/carddisp.pl?gene=YARS1">https://www.genecards.org/cgi-bin/carddisp.pl?gene=YARS1</a>     |
| PRLR    | Prolactin Receptor                                  | Protein Coding | 56 | GC05M035048 | 3.390128136 | <a href="https://www.genecards.org/cgi-bin/carddisp.pl?gene=PRLR">https://www.genecards.org/cgi-bin/carddisp.pl?gene=PRLR</a>       |
| TUBB    | Tubulin Beta Class I                                | Protein Coding | 57 | GC06P092134 | 3.388349056 | <a href="https://www.genecards.org/cgi-bin/carddisp.pl?gene=TUBB">https://www.genecards.org/cgi-bin/carddisp.pl?gene=TUBB</a>       |
| IRF1    | Interferon Regulatory Factor 1                      | Protein Coding | 53 | GC05M132440 | 3.387298346 | <a href="https://www.genecards.org/cgi-bin/carddisp.pl?gene=IRF1">https://www.genecards.org/cgi-bin/carddisp.pl?gene=IRF1</a>       |
| PABPC1  | Poly(A) Binding Protein Cytoplasmic 1               | Protein Coding | 49 | GC08M100685 | 3.384418249 | <a href="https://www.genecards.org/cgi-bin/carddisp.pl?gene=PABPC1">https://www.genecards.org/cgi-bin/carddisp.pl?gene=PABPC1</a>   |
| BCL2L1  | BCL2 Like 1                                         | Protein Coding | 55 | GC20M031664 | 3.38163662  | <a href="https://www.genecards.org/cgi-bin/carddisp.pl?gene=BCL2L1">https://www.genecards.org/cgi-bin/carddisp.pl?gene=BCL2L1</a>   |
| CYBB    | Cytochrome B-245 Beta Chain                         | Protein Coding | 56 | GC0XP037780 | 3.380608082 | <a href="https://www.genecards.org/cgi-bin/carddisp.pl?gene=CYBB">https://www.genecards.org/cgi-bin/carddisp.pl?gene=CYBB</a>       |
| OXTR    | Oxytocin Receptor                                   | Protein Coding | 53 | GC03M008767 | 3.37797904  | <a href="https://www.genecards.org/cgi-bin/carddisp.pl?gene=OXTR">https://www.genecards.org/cgi-bin/carddisp.pl?gene=OXTR</a>       |
| CERS5   | Ceramide Synthase 5                                 | Protein Coding | 46 | GC12M050129 | 3.376144171 | <a href="https://www.genecards.org/cgi-bin/carddisp.pl?gene=CERS5">https://www.genecards.org/cgi-bin/carddisp.pl?gene=CERS5</a>     |
| AWAT2   | Acyl-CoA Wax Alcohol Acyltransferase 2              | Protein Coding | 38 | GC0XM070040 | 3.374199867 | <a href="https://www.genecards.org/cgi-bin/carddisp.pl?gene=AWAT2">https://www.genecards.org/cgi-bin/carddisp.pl?gene=AWAT2</a>     |
| RAC2    | Rac Family Small GTPase 2                           | Protein Coding | 58 | GC22M061462 | 3.370952129 | <a href="https://www.genecards.org/cgi-bin/carddisp.pl?gene=RAC2">https://www.genecards.org/cgi-bin/carddisp.pl?gene=RAC2</a>       |
| IGF2BP3 | Insulin Like Growth Factor 2 mRNA Binding Protein 3 | Protein Coding | 48 | GC07M023354 | 3.36882925  | <a href="https://www.genecards.org/cgi-bin/carddisp.pl?gene=IGF2BP3">https://www.genecards.org/cgi-bin/carddisp.pl?gene=IGF2BP3</a> |
| PBX1    | PBX Homeobox 1                                      | Protein Coding | 55 | GC01P164524 | 3.368083    | <a href="https://www.genecards.org/cgi-bin/carddisp.pl?gene=PBX1">https://www.genecards.org/cgi-bin/carddisp.pl?gene=PBX1</a>       |
| DLG1    | Discs Large MAGUK Scaffold Protein 1                | Protein Coding | 50 | GC03M197042 | 3.367190838 | <a href="https://www.genecards.org/cgi-bin/carddisp.pl?gene=DLG1">https://www.genecards.org/cgi-bin/carddisp.pl?gene=DLG1</a>       |
| HSP90B1 | Heat Shock Protein 90 Beta Family Member 1          | Protein Coding | 53 | GC12P103930 | 3.367063761 | <a href="https://www.genecards.org/cgi-bin/carddisp.pl?gene=HSP90B1">https://www.genecards.org/cgi-bin/carddisp.pl?gene=HSP90B1</a> |

|         |                                                    |                |    |             |             |                                                                                                                                     |
|---------|----------------------------------------------------|----------------|----|-------------|-------------|-------------------------------------------------------------------------------------------------------------------------------------|
| SLC38A3 | Solute Carrier Family 38 Member 3                  | Protein Coding | 45 | GC03P050205 | 3.364940166 | <a href="https://www.genecards.org/cgi-bin/carddisp.pl?gene=SLC38A3">https://www.genecards.org/cgi-bin/carddisp.pl?gene=SLC38A3</a> |
| RHD     | Rh Blood Group D Antigen                           | Protein Coding | 48 | GC01P025272 | 3.362401962 | <a href="https://www.genecards.org/cgi-bin/carddisp.pl?gene=RHD">https://www.genecards.org/cgi-bin/carddisp.pl?gene=RHD</a>         |
| PLD2    | Phospholipase D2                                   | Protein Coding | 53 | GC17P004808 | 3.361949444 | <a href="https://www.genecards.org/cgi-bin/carddisp.pl?gene=PLD2">https://www.genecards.org/cgi-bin/carddisp.pl?gene=PLD2</a>       |
| PIM1    | Pim-1 Proto-Oncogene, Serine/Threonine Kinase      | Protein Coding | 56 | GC06P092302 | 3.3618958   | <a href="https://www.genecards.org/cgi-bin/carddisp.pl?gene=PIM1">https://www.genecards.org/cgi-bin/carddisp.pl?gene=PIM1</a>       |
| CDH13   | Cadherin 13                                        | Protein Coding | 51 | GC16P082626 | 3.359909773 | <a href="https://www.genecards.org/cgi-bin/carddisp.pl?gene=CDH13">https://www.genecards.org/cgi-bin/carddisp.pl?gene=CDH13</a>     |
| PTPRC   | Protein Tyrosine Phosphatase Receptor Type C       | Protein Coding | 59 | GC01P198607 | 3.355715752 | <a href="https://www.genecards.org/cgi-bin/carddisp.pl?gene=PTPRC">https://www.genecards.org/cgi-bin/carddisp.pl?gene=PTPRC</a>     |
| ESD     | Esterase D                                         | Protein Coding | 50 | GC13M046771 | 3.354079723 | <a href="https://www.genecards.org/cgi-bin/carddisp.pl?gene=ESD">https://www.genecards.org/cgi-bin/carddisp.pl?gene=ESD</a>         |
| GPBR1   | G Protein-Coupled Estrogen Receptor 1              | Protein Coding | 48 | GC07P003391 | 3.351549625 | <a href="https://www.genecards.org/cgi-bin/carddisp.pl?gene=GPBR1">https://www.genecards.org/cgi-bin/carddisp.pl?gene=GPBR1</a>     |
| MAP2K2  | Mitogen-Activated Protein Kinase Kinase 2          | Protein Coding | 61 | GC19M004090 | 3.350414038 | <a href="https://www.genecards.org/cgi-bin/carddisp.pl?gene=MAP2K2">https://www.genecards.org/cgi-bin/carddisp.pl?gene=MAP2K2</a>   |
| GRIP1   | Glutamate Receptor Interacting Protein 1           | Protein Coding | 50 | GC12M066347 | 3.350006342 | <a href="https://www.genecards.org/cgi-bin/carddisp.pl?gene=GRIP1">https://www.genecards.org/cgi-bin/carddisp.pl?gene=GRIP1</a>     |
| UCHL1   | Ubiquitin C-Terminal Hydrolase L1                  | Protein Coding | 59 | GC04P041256 | 3.342181206 | <a href="https://www.genecards.org/cgi-bin/carddisp.pl?gene=UCHL1">https://www.genecards.org/cgi-bin/carddisp.pl?gene=UCHL1</a>     |
| TP73    | Tumor Protein P73                                  | Protein Coding | 52 | GC01P003652 | 3.339853287 | <a href="https://www.genecards.org/cgi-bin/carddisp.pl?gene=TP73">https://www.genecards.org/cgi-bin/carddisp.pl?gene=TP73</a>       |
| EEF1A1  | Eukaryotic Translation Elongation Factor 1 Alpha 1 | Protein Coding | 50 | GC06M074523 | 3.338254929 | <a href="https://www.genecards.org/cgi-bin/carddisp.pl?gene=EEF1A1">https://www.genecards.org/cgi-bin/carddisp.pl?gene=EEF1A1</a>   |
| ELOVL5  | ELOVL Fatty Acid Elongase 5                        | Protein Coding | 51 | GC06M053267 | 3.337735653 | <a href="https://www.genecards.org/cgi-bin/carddisp.pl?gene=ELOVL5">https://www.genecards.org/cgi-bin/carddisp.pl?gene=ELOVL5</a>   |
| GRM7    | Glutamate Metabotropic Receptor 7                  | Protein Coding | 54 | GC03P006770 | 3.334997654 | <a href="https://www.genecards.org/cgi-bin/carddisp.pl?gene=GRM7">https://www.genecards.org/cgi-bin/carddisp.pl?gene=GRM7</a>       |

|         |                                                  |                |    |             |             |                                                                                                                                     |
|---------|--------------------------------------------------|----------------|----|-------------|-------------|-------------------------------------------------------------------------------------------------------------------------------------|
| HBEGF   | Heparin Binding EGF Like Growth Factor           | Protein Coding | 50 | GC05M140332 | 3.331227303 | <a href="https://www.genecards.org/cgi-bin/carddisp.pl?gene=HBEGF">https://www.genecards.org/cgi-bin/carddisp.pl?gene=HBEGF</a>     |
| SOS1    | SOS Ras/Rac Guanine Nucleotide Exchange Factor 1 | Protein Coding | 56 | GC02M039054 | 3.329431534 | <a href="https://www.genecards.org/cgi-bin/carddisp.pl?gene=SOS1">https://www.genecards.org/cgi-bin/carddisp.pl?gene=SOS1</a>       |
| BRS3    | Bombesin Receptor Subtype 3                      | Protein Coding | 48 | GC0XP136500 | 3.328694344 | <a href="https://www.genecards.org/cgi-bin/carddisp.pl?gene=BRS3">https://www.genecards.org/cgi-bin/carddisp.pl?gene=BRS3</a>       |
| CD59    | CD59 Molecule (CD59 Blood Group)                 | Protein Coding | 53 | GC11M033704 | 3.327222586 | <a href="https://www.genecards.org/cgi-bin/carddisp.pl?gene=CD59">https://www.genecards.org/cgi-bin/carddisp.pl?gene=CD59</a>       |
| CASP9   | Caspase 9                                        | Protein Coding | 53 | GC01M015491 | 3.326052904 | <a href="https://www.genecards.org/cgi-bin/carddisp.pl?gene=CASP9">https://www.genecards.org/cgi-bin/carddisp.pl?gene=CASP9</a>     |
| KRT8    | Keratin 8                                        | Protein Coding | 53 | GC12M052897 | 3.321171284 | <a href="https://www.genecards.org/cgi-bin/carddisp.pl?gene=KRT8">https://www.genecards.org/cgi-bin/carddisp.pl?gene=KRT8</a>       |
| OGA     | O-GlcNAcase                                      | Protein Coding | 47 | GC10M101785 | 3.319125414 | <a href="https://www.genecards.org/cgi-bin/carddisp.pl?gene=OGA">https://www.genecards.org/cgi-bin/carddisp.pl?gene=OGA</a>         |
| PDIA3   | Protein Disulfide Isomerase Family A Member 3    | Protein Coding | 51 | GC15P043746 | 3.316093206 | <a href="https://www.genecards.org/cgi-bin/carddisp.pl?gene=PDIA3">https://www.genecards.org/cgi-bin/carddisp.pl?gene=PDIA3</a>     |
| SLC18A2 | Solute Carrier Family 18 Member A2               | Protein Coding | 53 | GC10P117241 | 3.314780474 | <a href="https://www.genecards.org/cgi-bin/carddisp.pl?gene=SLC18A2">https://www.genecards.org/cgi-bin/carddisp.pl?gene=SLC18A2</a> |
| LIF     | LIF Interleukin 6 Family Cytokine                | Protein Coding | 50 | GC22M030240 | 3.313483238 | <a href="https://www.genecards.org/cgi-bin/carddisp.pl?gene=LIF">https://www.genecards.org/cgi-bin/carddisp.pl?gene=LIF</a>         |
| ADAM10  | ADAM Metallopeptidase Domain 10                  | Protein Coding | 60 | GC15M058588 | 3.312374353 | <a href="https://www.genecards.org/cgi-bin/carddisp.pl?gene=ADAM10">https://www.genecards.org/cgi-bin/carddisp.pl?gene=ADAM10</a>   |
| HTR3A   | 5-Hydroxytryptamine Receptor 3A                  | Protein Coding | 53 | GC11P113975 | 3.311017513 | <a href="https://www.genecards.org/cgi-bin/carddisp.pl?gene=HTR3A">https://www.genecards.org/cgi-bin/carddisp.pl?gene=HTR3A</a>     |
| PDE3A   | Phosphodiesterase 3A                             | Protein Coding | 56 | GC12P023897 | 3.31002903  | <a href="https://www.genecards.org/cgi-bin/carddisp.pl?gene=PDE3A">https://www.genecards.org/cgi-bin/carddisp.pl?gene=PDE3A</a>     |
| ACTN4   | Actinin Alpha 4                                  | Protein Coding | 53 | GC19P038647 | 3.30234313  | <a href="https://www.genecards.org/cgi-bin/carddisp.pl?gene=ACTN4">https://www.genecards.org/cgi-bin/carddisp.pl?gene=ACTN4</a>     |
| PDGFRA  | Platelet Derived Growth Factor Receptor Alpha    | Protein Coding | 60 | GC04P054229 | 3.300298452 | <a href="https://www.genecards.org/cgi-bin/carddisp.pl?gene=PDGFRA">https://www.genecards.org/cgi-bin/carddisp.pl?gene=PDGFRA</a>   |



|        |                                                |                |    |             |             |                                                                                                                                   |
|--------|------------------------------------------------|----------------|----|-------------|-------------|-----------------------------------------------------------------------------------------------------------------------------------|
| CD5    | CD5 Molecule                                   | Protein Coding | 49 | GC11P061118 | 3.298510313 | <a href="https://www.genecards.org/cgi-bin/carddisp.pl?gene=CD5">https://www.genecards.org/cgi-bin/carddisp.pl?gene=CD5</a>       |
| MKKS   | MKKS Centrosomal Shuttling Protein             | Protein Coding | 46 | GC20M010424 | 3.296190262 | <a href="https://www.genecards.org/cgi-bin/carddisp.pl?gene=MKKS">https://www.genecards.org/cgi-bin/carddisp.pl?gene=MKKS</a>     |
| MBP    | Myelin Basic Protein                           | Protein Coding | 51 | GC18M076978 | 3.292306185 | <a href="https://www.genecards.org/cgi-bin/carddisp.pl?gene=MBP">https://www.genecards.org/cgi-bin/carddisp.pl?gene=MBP</a>       |
| GATA1  | GATA Binding Protein 1                         | Protein Coding | 53 | GC0XP048786 | 3.289469004 | <a href="https://www.genecards.org/cgi-bin/carddisp.pl?gene=GATA1">https://www.genecards.org/cgi-bin/carddisp.pl?gene=GATA1</a>   |
| PRLH   | Prolactin Releasing Hormone                    | Protein Coding | 37 | GC02P237566 | 3.283510208 | <a href="https://www.genecards.org/cgi-bin/carddisp.pl?gene=PRLH">https://www.genecards.org/cgi-bin/carddisp.pl?gene=PRLH</a>     |
| FLT1   | Fms Related Receptor Tyrosine Kinase 1         | Protein Coding | 57 | GC13M028300 | 3.281445742 | <a href="https://www.genecards.org/cgi-bin/carddisp.pl?gene=FLT1">https://www.genecards.org/cgi-bin/carddisp.pl?gene=FLT1</a>     |
| NR4A1  | Nuclear Receptor Subfamily 4 Group A Member 1  | Protein Coding | 54 | GC12P052022 | 3.275763988 | <a href="https://www.genecards.org/cgi-bin/carddisp.pl?gene=NR4A1">https://www.genecards.org/cgi-bin/carddisp.pl?gene=NR4A1</a>   |
| DUSP1  | Dual Specificity Phosphatase 1                 | Protein Coding | 52 | GC05M172768 | 3.268606186 | <a href="https://www.genecards.org/cgi-bin/carddisp.pl?gene=DUSP1">https://www.genecards.org/cgi-bin/carddisp.pl?gene=DUSP1</a>   |
| NMT1   | N-Myristoyltransferase 1                       | Protein Coding | 50 | GC17P062083 | 3.262718201 | <a href="https://www.genecards.org/cgi-bin/carddisp.pl?gene=NMT1">https://www.genecards.org/cgi-bin/carddisp.pl?gene=NMT1</a>     |
| SMAD2  | SMAD Family Member 2                           | Protein Coding | 59 | GC18M047809 | 3.257688046 | <a href="https://www.genecards.org/cgi-bin/carddisp.pl?gene=SMAD2">https://www.genecards.org/cgi-bin/carddisp.pl?gene=SMAD2</a>   |
| F2RL1  | F2R Like Trypsin Receptor 1                    | Protein Coding | 51 | GC05P076818 | 3.256936073 | <a href="https://www.genecards.org/cgi-bin/carddisp.pl?gene=F2RL1">https://www.genecards.org/cgi-bin/carddisp.pl?gene=F2RL1</a>   |
| MT3    | Metallothionein 3                              | Protein Coding | 44 | GC16P056589 | 3.255939245 | <a href="https://www.genecards.org/cgi-bin/carddisp.pl?gene=MT3">https://www.genecards.org/cgi-bin/carddisp.pl?gene=MT3</a>       |
| AGPAT3 | 1-Acylglycerol-3-Phosphate O-Acyltransferase 3 | Protein Coding | 46 | GC21P043865 | 3.250079155 | <a href="https://www.genecards.org/cgi-bin/carddisp.pl?gene=AGPAT3">https://www.genecards.org/cgi-bin/carddisp.pl?gene=AGPAT3</a> |
| LRRK2  | Leucine Rich Repeat Kinase 2                   | Protein Coding | 56 | GC12P040196 | 3.246121168 | <a href="https://www.genecards.org/cgi-bin/carddisp.pl?gene=LRRK2">https://www.genecards.org/cgi-bin/carddisp.pl?gene=LRRK2</a>   |
| SGCB   | Sarcoglycan Beta                               | Protein Coding | 47 | GC04M052019 | 3.243461609 | <a href="https://www.genecards.org/cgi-bin/carddisp.pl?gene=SGCB">https://www.genecards.org/cgi-bin/carddisp.pl?gene=SGCB</a>     |

|        |                                                             |                |    |             |             |                                                                                                                                   |
|--------|-------------------------------------------------------------|----------------|----|-------------|-------------|-----------------------------------------------------------------------------------------------------------------------------------|
| CRHR2  | Corticotropin Releasing Hormone Receptor 2                  | Protein Coding | 50 | GC07M030651 | 3.241627216 | <a href="https://www.genecards.org/cgi-bin/carddisp.pl?gene=CRHR2">https://www.genecards.org/cgi-bin/carddisp.pl?gene=CRHR2</a>   |
| PROS1  | Protein S                                                   | Protein Coding | 55 | GC03M093873 | 3.237989426 | <a href="https://www.genecards.org/cgi-bin/carddisp.pl?gene=PROS1">https://www.genecards.org/cgi-bin/carddisp.pl?gene=PROS1</a>   |
| TRIM63 | Tripartite Motif Containing 63                              | Protein Coding | 48 | GC01M026066 | 3.235760689 | <a href="https://www.genecards.org/cgi-bin/carddisp.pl?gene=TRIM63">https://www.genecards.org/cgi-bin/carddisp.pl?gene=TRIM63</a> |
| IL16   | Interleukin 16                                              | Protein Coding | 48 | GC15P081159 | 3.232122421 | <a href="https://www.genecards.org/cgi-bin/carddisp.pl?gene=IL16">https://www.genecards.org/cgi-bin/carddisp.pl?gene=IL16</a>     |
| DRD3   | Dopamine Receptor D3                                        | Protein Coding | 51 | GC03M114128 | 3.227733612 | <a href="https://www.genecards.org/cgi-bin/carddisp.pl?gene=DRD3">https://www.genecards.org/cgi-bin/carddisp.pl?gene=DRD3</a>     |
| ALK    | ALK Receptor Tyrosine Kinase                                | Protein Coding | 59 | GC02M029190 | 3.226660728 | <a href="https://www.genecards.org/cgi-bin/carddisp.pl?gene=ALK">https://www.genecards.org/cgi-bin/carddisp.pl?gene=ALK</a>       |
| NF1    | Neurofibromin 1                                             | Protein Coding | 54 | GC17P031094 | 3.22521162  | <a href="https://www.genecards.org/cgi-bin/carddisp.pl?gene=NF1">https://www.genecards.org/cgi-bin/carddisp.pl?gene=NF1</a>       |
| BUD23  | BUD23 RRNA Methyltransferase And Ribosome Maturation Factor | Protein Coding | 44 | GC07P076357 | 3.224797249 | <a href="https://www.genecards.org/cgi-bin/carddisp.pl?gene=BUD23">https://www.genecards.org/cgi-bin/carddisp.pl?gene=BUD23</a>   |
| ATXN3  | Ataxin 3                                                    | Protein Coding | 52 | GC14M103083 | 3.224014997 | <a href="https://www.genecards.org/cgi-bin/carddisp.pl?gene=ATXN3">https://www.genecards.org/cgi-bin/carddisp.pl?gene=ATXN3</a>   |
| EIF4E  | Eukaryotic Translation Initiation Factor 4E                 | Protein Coding | 56 | GC04M098879 | 3.223826408 | <a href="https://www.genecards.org/cgi-bin/carddisp.pl?gene=EIF4E">https://www.genecards.org/cgi-bin/carddisp.pl?gene=EIF4E</a>   |
| JAK1   | Janus Kinase 1                                              | Protein Coding | 60 | GC01M064833 | 3.22107625  | <a href="https://www.genecards.org/cgi-bin/carddisp.pl?gene=JAK1">https://www.genecards.org/cgi-bin/carddisp.pl?gene=JAK1</a>     |
| SAT2   | Spermidine/Spermine N1-Acetyltransferase Family Member 2    | Protein Coding | 43 | GC17M007626 | 3.216407537 | <a href="https://www.genecards.org/cgi-bin/carddisp.pl?gene=SAT2">https://www.genecards.org/cgi-bin/carddisp.pl?gene=SAT2</a>     |
| CHRM3  | Cholinergic Receptor Muscarinic 3                           | Protein Coding | 55 | GC01P239386 | 3.215517282 | <a href="https://www.genecards.org/cgi-bin/carddisp.pl?gene=CHRM3">https://www.genecards.org/cgi-bin/carddisp.pl?gene=CHRM3</a>   |
| KRT14  | Keratin 14                                                  | Protein Coding | 53 | GC17M041582 | 3.214873791 | <a href="https://www.genecards.org/cgi-bin/carddisp.pl?gene=KRT14">https://www.genecards.org/cgi-bin/carddisp.pl?gene=KRT14</a>   |
| LALBA  | Lactalbumin Alpha                                           | Protein Coding | 45 | GC12M048567 | 3.212843418 | <a href="https://www.genecards.org/cgi-bin/carddisp.pl?gene=LALBA">https://www.genecards.org/cgi-bin/carddisp.pl?gene=LALBA</a>   |

|          |                                                                  |                |    |             |             |                                                                                                                                       |
|----------|------------------------------------------------------------------|----------------|----|-------------|-------------|---------------------------------------------------------------------------------------------------------------------------------------|
| TAC1     | Tachykinin Precursor 1                                           | Protein Coding | 48 | GC07P097731 | 3.212556362 | <a href="https://www.genecards.org/cgi-bin/carddisp.pl?gene=TAC1">https://www.genecards.org/cgi-bin/carddisp.pl?gene=TAC1</a>         |
| SMAD6    | SMAD Family Member 6                                             | Protein Coding | 53 | GC15P066702 | 3.210130453 | <a href="https://www.genecards.org/cgi-bin/carddisp.pl?gene=SMAD6">https://www.genecards.org/cgi-bin/carddisp.pl?gene=SMAD6</a>       |
| CYSLTR2  | Cysteinyl Leukotriene Receptor 2                                 | Protein Coding | 54 | GC13P048653 | 3.206436157 | <a href="https://www.genecards.org/cgi-bin/carddisp.pl?gene=CYSLTR2">https://www.genecards.org/cgi-bin/carddisp.pl?gene=CYSLTR2</a>   |
| MAG      | Myelin Associated Glycoprotein                                   | Protein Coding | 54 | GC19P035292 | 3.204558611 | <a href="https://www.genecards.org/cgi-bin/carddisp.pl?gene=MAG">https://www.genecards.org/cgi-bin/carddisp.pl?gene=MAG</a>           |
| KHDRBS3  | KH RNA Binding Domain Containing, Signal Transduction Associated | Protein Coding | 45 | GC08P135457 | 3.195662022 | <a href="https://www.genecards.org/cgi-bin/carddisp.pl?gene=KHDRBS3">https://www.genecards.org/cgi-bin/carddisp.pl?gene=KHDRBS3</a>   |
| ACTN1    | Actinin Alpha 1                                                  | Protein Coding | 56 | GC14M068874 | 3.193297863 | <a href="https://www.genecards.org/cgi-bin/carddisp.pl?gene=ACTN1">https://www.genecards.org/cgi-bin/carddisp.pl?gene=ACTN1</a>       |
| TTF2     | Transcription Termination Factor 2                               | Protein Coding | 46 | GC01P117060 | 3.191391945 | <a href="https://www.genecards.org/cgi-bin/carddisp.pl?gene=TTF2">https://www.genecards.org/cgi-bin/carddisp.pl?gene=TTF2</a>         |
| SLC22A8  | Solute Carrier Family 22 Member 8                                | Protein Coding | 49 | GC11M099608 | 3.190941095 | <a href="https://www.genecards.org/cgi-bin/carddisp.pl?gene=SLC22A8">https://www.genecards.org/cgi-bin/carddisp.pl?gene=SLC22A8</a>   |
| UBE3A    | Ubiquitin Protein Ligase E3A                                     | Protein Coding | 53 | GC15M025333 | 3.18576026  | <a href="https://www.genecards.org/cgi-bin/carddisp.pl?gene=UBE3A">https://www.genecards.org/cgi-bin/carddisp.pl?gene=UBE3A</a>       |
| CSF1R    | Colony Stimulating Factor 1 Receptor                             | Protein Coding | 59 | GC05M150053 | 3.183142424 | <a href="https://www.genecards.org/cgi-bin/carddisp.pl?gene=CSF1R">https://www.genecards.org/cgi-bin/carddisp.pl?gene=CSF1R</a>       |
| SLC1A2   | Solute Carrier Family 1 Member 2                                 | Protein Coding | 56 | GC11M035267 | 3.181488752 | <a href="https://www.genecards.org/cgi-bin/carddisp.pl?gene=SLC1A2">https://www.genecards.org/cgi-bin/carddisp.pl?gene=SLC1A2</a>     |
| ANG      | Angiogenin                                                       | Protein Coding | 51 | GC14P034388 | 3.176154375 | <a href="https://www.genecards.org/cgi-bin/carddisp.pl?gene=ANG">https://www.genecards.org/cgi-bin/carddisp.pl?gene=ANG</a>           |
| RPA2     | Replication Protein A2                                           | Protein Coding | 50 | GC01M028119 | 3.170302391 | <a href="https://www.genecards.org/cgi-bin/carddisp.pl?gene=RPA2">https://www.genecards.org/cgi-bin/carddisp.pl?gene=RPA2</a>         |
| SERPING1 | Serpin Family G Member 1                                         | Protein Coding | 54 | GC11P057597 | 3.169795513 | <a href="https://www.genecards.org/cgi-bin/carddisp.pl?gene=SERPING1">https://www.genecards.org/cgi-bin/carddisp.pl?gene=SERPING1</a> |
| PTGER3   | Prostaglandin E Receptor 3                                       | Protein Coding | 53 | GC01M070852 | 3.167470455 | <a href="https://www.genecards.org/cgi-bin/carddisp.pl?gene=PTGER3">https://www.genecards.org/cgi-bin/carddisp.pl?gene=PTGER3</a>     |

|         |                                                                        |                |    |             |             |                                                                                                                                     |
|---------|------------------------------------------------------------------------|----------------|----|-------------|-------------|-------------------------------------------------------------------------------------------------------------------------------------|
| JAK3    | Janus Kinase 3                                                         | Protein Coding | 58 | GC19M017824 | 3.165206909 | <a href="https://www.genecards.org/cgi-bin/carddisp.pl?gene=JAK3">https://www.genecards.org/cgi-bin/carddisp.pl?gene=JAK3</a>       |
| CDC42   | Cell Division Cycle 42                                                 | Protein Coding | 57 | GC01P022052 | 3.15984416  | <a href="https://www.genecards.org/cgi-bin/carddisp.pl?gene=CDC42">https://www.genecards.org/cgi-bin/carddisp.pl?gene=CDC42</a>     |
| WNT5A   | Wnt Family Member 5A                                                   | Protein Coding | 56 | GC03M055465 | 3.15939784  | <a href="https://www.genecards.org/cgi-bin/carddisp.pl?gene=WNT5A">https://www.genecards.org/cgi-bin/carddisp.pl?gene=WNT5A</a>     |
| S100A9  | S100 Calcium Binding Protein A9                                        | Protein Coding | 50 | GC01P153357 | 3.159015179 | <a href="https://www.genecards.org/cgi-bin/carddisp.pl?gene=S100A9">https://www.genecards.org/cgi-bin/carddisp.pl?gene=S100A9</a>   |
| CYGB    | Cytoglobin                                                             | Protein Coding | 45 | GC17M076527 | 3.154545784 | <a href="https://www.genecards.org/cgi-bin/carddisp.pl?gene=CYGB">https://www.genecards.org/cgi-bin/carddisp.pl?gene=CYGB</a>       |
| KMT2A   | Lysine Methyltransferase 2A                                            | Protein Coding | 54 | GC11P118436 | 3.151390553 | <a href="https://www.genecards.org/cgi-bin/carddisp.pl?gene=KMT2A">https://www.genecards.org/cgi-bin/carddisp.pl?gene=KMT2A</a>     |
| PDGFRL  | Platelet Derived Growth Factor Receptor Like                           | Protein Coding | 50 | GC08P017576 | 3.149273634 | <a href="https://www.genecards.org/cgi-bin/carddisp.pl?gene=PDGFRL">https://www.genecards.org/cgi-bin/carddisp.pl?gene=PDGFRL</a>   |
| GRK2    | G Protein-Coupled Receptor Kinase 2                                    | Protein Coding | 53 | GC11P067266 | 3.148638248 | <a href="https://www.genecards.org/cgi-bin/carddisp.pl?gene=GRK2">https://www.genecards.org/cgi-bin/carddisp.pl?gene=GRK2</a>       |
| KITLG   | KIT Ligand                                                             | Protein Coding | 53 | GC12M088492 | 3.148565292 | <a href="https://www.genecards.org/cgi-bin/carddisp.pl?gene=KITLG">https://www.genecards.org/cgi-bin/carddisp.pl?gene=KITLG</a>     |
| CDH2    | Cadherin 2                                                             | Protein Coding | 59 | GC18M028088 | 3.1409235   | <a href="https://www.genecards.org/cgi-bin/carddisp.pl?gene=CDH2">https://www.genecards.org/cgi-bin/carddisp.pl?gene=CDH2</a>       |
| CSNK2A2 | Casein Kinase 2 Alpha 2                                                | Protein Coding | 53 | GC16M058157 | 3.137202501 | <a href="https://www.genecards.org/cgi-bin/carddisp.pl?gene=CSNK2A2">https://www.genecards.org/cgi-bin/carddisp.pl?gene=CSNK2A2</a> |
| POMGNT2 | Protein O-Linked Mannose N-Acetylglucosaminyltransferase 2 (Beta 1,4-) | Protein Coding | 44 | GC03M043121 | 3.133676291 | <a href="https://www.genecards.org/cgi-bin/carddisp.pl?gene=POMGNT2">https://www.genecards.org/cgi-bin/carddisp.pl?gene=POMGNT2</a> |
| ANXA2   | Annexin A2                                                             | Protein Coding | 55 | GC15M060347 | 3.130560637 | <a href="https://www.genecards.org/cgi-bin/carddisp.pl?gene=ANXA2">https://www.genecards.org/cgi-bin/carddisp.pl?gene=ANXA2</a>     |
| DDR1    | Discoidin Domain Receptor Tyrosine Kinase 1                            | Protein Coding | 53 | GC06P092137 | 3.126752853 | <a href="https://www.genecards.org/cgi-bin/carddisp.pl?gene=DDR1">https://www.genecards.org/cgi-bin/carddisp.pl?gene=DDR1</a>       |
| CDK6    | Cyclin Dependent Kinase 6                                              | Protein Coding | 59 | GC07M092604 | 3.125250101 | <a href="https://www.genecards.org/cgi-bin/carddisp.pl?gene=CDK6">https://www.genecards.org/cgi-bin/carddisp.pl?gene=CDK6</a>       |

|         |                                                      |                |    |             |             |                                                                                                                                     |
|---------|------------------------------------------------------|----------------|----|-------------|-------------|-------------------------------------------------------------------------------------------------------------------------------------|
| MLN     | Motilin                                              | Protein Coding | 40 | GC06M033794 | 3.12496376  | <a href="https://www.genecards.org/cgi-bin/carddisp.pl?gene=MLN">https://www.genecards.org/cgi-bin/carddisp.pl?gene=MLN</a>         |
| GSN     | Gelsolin                                             | Protein Coding | 56 | GC09P121201 | 3.119424343 | <a href="https://www.genecards.org/cgi-bin/carddisp.pl?gene=GSN">https://www.genecards.org/cgi-bin/carddisp.pl?gene=GSN</a>         |
| PTCH1   | Patched 1                                            | Protein Coding | 57 | GC09M095442 | 3.118463278 | <a href="https://www.genecards.org/cgi-bin/carddisp.pl?gene=PTCH1">https://www.genecards.org/cgi-bin/carddisp.pl?gene=PTCH1</a>     |
| SCG5    | Secretogranin V                                      | Protein Coding | 43 | GC15P032641 | 3.115576029 | <a href="https://www.genecards.org/cgi-bin/carddisp.pl?gene=SCG5">https://www.genecards.org/cgi-bin/carddisp.pl?gene=SCG5</a>       |
| ITPR1   | Inositol 1,4,5-Trisphosphate Receptor Type 1         | Protein Coding | 55 | GC03P004486 | 3.114220381 | <a href="https://www.genecards.org/cgi-bin/carddisp.pl?gene=ITPR1">https://www.genecards.org/cgi-bin/carddisp.pl?gene=ITPR1</a>     |
| ELOVL7  | ELOVL Fatty Acid Elongase 7                          | Protein Coding | 44 | GC05M060751 | 3.107929945 | <a href="https://www.genecards.org/cgi-bin/carddisp.pl?gene=ELOVL7">https://www.genecards.org/cgi-bin/carddisp.pl?gene=ELOVL7</a>   |
| CPQ     | Carboxypeptidase Q                                   | Protein Coding | 44 | GC08P096645 | 3.10552454  | <a href="https://www.genecards.org/cgi-bin/carddisp.pl?gene=CPQ">https://www.genecards.org/cgi-bin/carddisp.pl?gene=CPQ</a>         |
| STC2    | Stanniocalcin 2                                      | Protein Coding | 48 | GC05M173314 | 3.101755142 | <a href="https://www.genecards.org/cgi-bin/carddisp.pl?gene=STC2">https://www.genecards.org/cgi-bin/carddisp.pl?gene=STC2</a>       |
| SLC15A1 | Solute Carrier Family 15 Member 1                    | Protein Coding | 50 | GC13M098683 | 3.098032951 | <a href="https://www.genecards.org/cgi-bin/carddisp.pl?gene=SLC15A1">https://www.genecards.org/cgi-bin/carddisp.pl?gene=SLC15A1</a> |
| CA10    | Carbonic Anhydrase 10                                | Protein Coding | 46 | GC17M051630 | 3.09686017  | <a href="https://www.genecards.org/cgi-bin/carddisp.pl?gene=CA10">https://www.genecards.org/cgi-bin/carddisp.pl?gene=CA10</a>       |
| TPR     | Translocated Promoter Region, Nuclear Basket Protein | Protein Coding | 50 | GC01M186323 | 3.096314192 | <a href="https://www.genecards.org/cgi-bin/carddisp.pl?gene=TPR">https://www.genecards.org/cgi-bin/carddisp.pl?gene=TPR</a>         |
| CALB1   | Calbindin 1                                          | Protein Coding | 49 | GC08M090058 | 3.095009327 | <a href="https://www.genecards.org/cgi-bin/carddisp.pl?gene=CALB1">https://www.genecards.org/cgi-bin/carddisp.pl?gene=CALB1</a>     |
| REL     | REL Proto-Oncogene, NF-KB Subunit                    | Protein Coding | 53 | GC02P060881 | 3.093712807 | <a href="https://www.genecards.org/cgi-bin/carddisp.pl?gene=REL">https://www.genecards.org/cgi-bin/carddisp.pl?gene=REL</a>         |
| DDX5    | DEAD-Box Helicase 5                                  | Protein Coding | 52 | GC17M064498 | 3.092330456 | <a href="https://www.genecards.org/cgi-bin/carddisp.pl?gene=DDX5">https://www.genecards.org/cgi-bin/carddisp.pl?gene=DDX5</a>       |
| PDCD1   | Programmed Cell Death 1                              | Protein Coding | 55 | GC02M241849 | 3.091902733 | <a href="https://www.genecards.org/cgi-bin/carddisp.pl?gene=PDCD1">https://www.genecards.org/cgi-bin/carddisp.pl?gene=PDCD1</a>     |

|          |                                              |                |    |             |             |                                                                                                                                       |
|----------|----------------------------------------------|----------------|----|-------------|-------------|---------------------------------------------------------------------------------------------------------------------------------------|
| MSR1     | Macrophage Scavenger Receptor 1              | Protein Coding | 52 | GC08M016107 | 3.090070248 | <a href="https://www.genecards.org/cgi-bin/carddisp.pl?gene=MSR1">https://www.genecards.org/cgi-bin/carddisp.pl?gene=MSR1</a>         |
| RAN      | RAN, Member RAS Oncogene Family              | Protein Coding | 50 | GC12P130871 | 3.086040258 | <a href="https://www.genecards.org/cgi-bin/carddisp.pl?gene=RAN">https://www.genecards.org/cgi-bin/carddisp.pl?gene=RAN</a>           |
| CDC25A   | Cell Division Cycle 25A                      | Protein Coding | 54 | GC03M048195 | 3.084305286 | <a href="https://www.genecards.org/cgi-bin/carddisp.pl?gene=CDC25A">https://www.genecards.org/cgi-bin/carddisp.pl?gene=CDC25A</a>     |
| ZDHHC5   | Zinc Finger DHHC-Type Palmitoyltransferase 5 | Protein Coding | 44 | GC11P057670 | 3.082505703 | <a href="https://www.genecards.org/cgi-bin/carddisp.pl?gene=ZDHHC5">https://www.genecards.org/cgi-bin/carddisp.pl?gene=ZDHHC5</a>     |
| HPR      | Haptoglobin-Related Protein                  | Protein Coding | 46 | GC16P072373 | 3.08214283  | <a href="https://www.genecards.org/cgi-bin/carddisp.pl?gene=HPR">https://www.genecards.org/cgi-bin/carddisp.pl?gene=HPR</a>           |
| ACOT7    | Acyl-CoA Thioesterase 7                      | Protein Coding | 47 | GC01M007591 | 3.081958532 | <a href="https://www.genecards.org/cgi-bin/carddisp.pl?gene=ACOT7">https://www.genecards.org/cgi-bin/carddisp.pl?gene=ACOT7</a>       |
| PAK1     | P21 (RAC1) Activated Kinase 1                | Protein Coding | 57 | GC11M100100 | 3.080955982 | <a href="https://www.genecards.org/cgi-bin/carddisp.pl?gene=PAK1">https://www.genecards.org/cgi-bin/carddisp.pl?gene=PAK1</a>         |
| HYAL2    | Hyaluronidase 2                              | Protein Coding | 51 | GC03M050317 | 3.079611301 | <a href="https://www.genecards.org/cgi-bin/carddisp.pl?gene=HYAL2">https://www.genecards.org/cgi-bin/carddisp.pl?gene=HYAL2</a>       |
| DUSP19   | Dual Specificity Phosphatase 19              | Protein Coding | 44 | GC02P183078 | 3.077805996 | <a href="https://www.genecards.org/cgi-bin/carddisp.pl?gene=DUSP19">https://www.genecards.org/cgi-bin/carddisp.pl?gene=DUSP19</a>     |
| MAPK7    | Mitogen-Activated Protein Kinase 7           | Protein Coding | 54 | GC17P061131 | 3.077512503 | <a href="https://www.genecards.org/cgi-bin/carddisp.pl?gene=MAPK7">https://www.genecards.org/cgi-bin/carddisp.pl?gene=MAPK7</a>       |
| BAD      | BCL2 Associated Agonist Of Cell Death        | Protein Coding | 51 | GC11M099650 | 3.075921774 | <a href="https://www.genecards.org/cgi-bin/carddisp.pl?gene=BAD">https://www.genecards.org/cgi-bin/carddisp.pl?gene=BAD</a>           |
| ADCY5    | Adenylate Cyclase 5                          | Protein Coding | 55 | GC03M123282 | 3.074261189 | <a href="https://www.genecards.org/cgi-bin/carddisp.pl?gene=ADCY5">https://www.genecards.org/cgi-bin/carddisp.pl?gene=ADCY5</a>       |
| ADAMTSL1 | ADAMTS Like 1                                | Protein Coding | 49 | GC09P017906 | 3.073168039 | <a href="https://www.genecards.org/cgi-bin/carddisp.pl?gene=ADAMTSL1">https://www.genecards.org/cgi-bin/carddisp.pl?gene=ADAMTSL1</a> |
| CCR5     | C-C Motif Chemokine Receptor 5               | Protein Coding | 53 | GC03P047615 | 3.073025703 | <a href="https://www.genecards.org/cgi-bin/carddisp.pl?gene=CCR5">https://www.genecards.org/cgi-bin/carddisp.pl?gene=CCR5</a>         |
| GZMB     | Granzyme B                                   | Protein Coding | 54 | GC14M024630 | 3.072257996 | <a href="https://www.genecards.org/cgi-bin/carddisp.pl?gene=GZMB">https://www.genecards.org/cgi-bin/carddisp.pl?gene=GZMB</a>         |

|        |                                           |                |    |             |             |                                                                                                                                   |
|--------|-------------------------------------------|----------------|----|-------------|-------------|-----------------------------------------------------------------------------------------------------------------------------------|
| HRH1   | Histamine Receptor H1                     | Protein Coding | 52 | GC03P013698 | 3.071516037 | <a href="https://www.genecards.org/cgi-bin/carddisp.pl?gene=HRH1">https://www.genecards.org/cgi-bin/carddisp.pl?gene=HRH1</a>     |
| CERS3  | Ceramide Synthase 3                       | Protein Coding | 47 | GC15M122864 | 3.067425251 | <a href="https://www.genecards.org/cgi-bin/carddisp.pl?gene=CERS3">https://www.genecards.org/cgi-bin/carddisp.pl?gene=CERS3</a>   |
| NEFH   | Neurofilament Heavy Chain                 | Protein Coding | 52 | GC22P029480 | 3.063281059 | <a href="https://www.genecards.org/cgi-bin/carddisp.pl?gene=NEFH">https://www.genecards.org/cgi-bin/carddisp.pl?gene=NEFH</a>     |
| RPS6   | Ribosomal Protein S6                      | Protein Coding | 50 | GC09M019375 | 3.061184645 | <a href="https://www.genecards.org/cgi-bin/carddisp.pl?gene=RPS6">https://www.genecards.org/cgi-bin/carddisp.pl?gene=RPS6</a>     |
| POU1F1 | POU Class 1 Homeobox 1                    | Protein Coding | 48 | GC03M087259 | 3.055360556 | <a href="https://www.genecards.org/cgi-bin/carddisp.pl?gene=POU1F1">https://www.genecards.org/cgi-bin/carddisp.pl?gene=POU1F1</a> |
| AANAT  | Aralkylamine N-Acetyltransferase          | Protein Coding | 46 | GC17P076453 | 3.053804159 | <a href="https://www.genecards.org/cgi-bin/carddisp.pl?gene=AANAT">https://www.genecards.org/cgi-bin/carddisp.pl?gene=AANAT</a>   |
| GNAQ   | G Protein Subunit Alpha Q                 | Protein Coding | 55 | GC09M077716 | 3.051543951 | <a href="https://www.genecards.org/cgi-bin/carddisp.pl?gene=GNAQ">https://www.genecards.org/cgi-bin/carddisp.pl?gene=GNAQ</a>     |
| LCLAT1 | Lysocardiolipin Acyltransferase 1         | Protein Coding | 43 | GC02P030447 | 3.03848815  | <a href="https://www.genecards.org/cgi-bin/carddisp.pl?gene=LCLAT1">https://www.genecards.org/cgi-bin/carddisp.pl?gene=LCLAT1</a> |
| IL2RG  | Interleukin 2 Receptor Subunit Gamma      | Protein Coding | 55 | GC0XM071108 | 3.037034273 | <a href="https://www.genecards.org/cgi-bin/carddisp.pl?gene=IL2RG">https://www.genecards.org/cgi-bin/carddisp.pl?gene=IL2RG</a>   |
| NOX1   | NADPH Oxidase 1                           | Protein Coding | 50 | GC0XM100843 | 3.033960581 | <a href="https://www.genecards.org/cgi-bin/carddisp.pl?gene=NOX1">https://www.genecards.org/cgi-bin/carddisp.pl?gene=NOX1</a>     |
| LPCAT3 | Lysophosphatidylcholine Acyltransferase 3 | Protein Coding | 44 | GC12M006976 | 3.032484293 | <a href="https://www.genecards.org/cgi-bin/carddisp.pl?gene=LPCAT3">https://www.genecards.org/cgi-bin/carddisp.pl?gene=LPCAT3</a> |
| DSPP   | Dentin Sialophosphoprotein                | Protein Coding | 45 | GC04P087608 | 3.03011179  | <a href="https://www.genecards.org/cgi-bin/carddisp.pl?gene=DSPP">https://www.genecards.org/cgi-bin/carddisp.pl?gene=DSPP</a>     |
| EDNRB  | Endothelin Receptor Type B                | Protein Coding | 56 | GC13M077895 | 3.028537989 | <a href="https://www.genecards.org/cgi-bin/carddisp.pl?gene=EDNRB">https://www.genecards.org/cgi-bin/carddisp.pl?gene=EDNRB</a>   |
| CCN1   | Cellular Communication Network Factor 1   | Protein Coding | 47 | GC01P085581 | 3.02657032  | <a href="https://www.genecards.org/cgi-bin/carddisp.pl?gene=CCN1">https://www.genecards.org/cgi-bin/carddisp.pl?gene=CCN1</a>     |
| UTS2   | Urotensin 2                               | Protein Coding | 46 | GC01M007843 | 3.025096655 | <a href="https://www.genecards.org/cgi-bin/carddisp.pl?gene=UTS2">https://www.genecards.org/cgi-bin/carddisp.pl?gene=UTS2</a>     |

|         |                                                                          |                |    |             |             |                                                                                                                                     |
|---------|--------------------------------------------------------------------------|----------------|----|-------------|-------------|-------------------------------------------------------------------------------------------------------------------------------------|
| CCND2   | Cyclin D2                                                                | Protein Coding | 55 | GC12P023493 | 3.024245024 | <a href="https://www.genecards.org/cgi-bin/carddisp.pl?gene=CCND2">https://www.genecards.org/cgi-bin/carddisp.pl?gene=CCND2</a>     |
| RAB5A   | RAB5A, Member RAS Oncogene Family                                        | Protein Coding | 51 | GC03P019948 | 3.02043581  | <a href="https://www.genecards.org/cgi-bin/carddisp.pl?gene=RAB5A">https://www.genecards.org/cgi-bin/carddisp.pl?gene=RAB5A</a>     |
| MKI67   | Marker Of Proliferation Ki-67                                            | Protein Coding | 51 | GC10M128096 | 3.018312931 | <a href="https://www.genecards.org/cgi-bin/carddisp.pl?gene=MKI67">https://www.genecards.org/cgi-bin/carddisp.pl?gene=MKI67</a>     |
| EIF2AK1 | Eukaryotic Translation Initiation Factor 2 Alpha Kinase 1                | Protein Coding | 51 | GC07M006022 | 3.017688274 | <a href="https://www.genecards.org/cgi-bin/carddisp.pl?gene=EIF2AK1">https://www.genecards.org/cgi-bin/carddisp.pl?gene=EIF2AK1</a> |
| MAP3K7  | Mitogen-Activated Protein Kinase Kinase Kinase 7                         | Protein Coding | 57 | GC06M090513 | 3.015327454 | <a href="https://www.genecards.org/cgi-bin/carddisp.pl?gene=MAP3K7">https://www.genecards.org/cgi-bin/carddisp.pl?gene=MAP3K7</a>   |
| CERS4   | Ceramide Synthase 4                                                      | Protein Coding | 48 | GC19P008206 | 3.009953976 | <a href="https://www.genecards.org/cgi-bin/carddisp.pl?gene=CERS4">https://www.genecards.org/cgi-bin/carddisp.pl?gene=CERS4</a>     |
| F2R     | Coagulation Factor II Thrombin Receptor                                  | Protein Coding | 53 | GC05P076716 | 3.008503437 | <a href="https://www.genecards.org/cgi-bin/carddisp.pl?gene=F2R">https://www.genecards.org/cgi-bin/carddisp.pl?gene=F2R</a>         |
| CR1     | Complement C3b/C4b Receptor 1 (Knops Blood Group)                        | Protein Coding | 51 | GC01P207496 | 3.006123543 | <a href="https://www.genecards.org/cgi-bin/carddisp.pl?gene=CR1">https://www.genecards.org/cgi-bin/carddisp.pl?gene=CR1</a>         |
| CCNA2   | Cyclin A2                                                                | Protein Coding | 52 | GC04M121816 | 3.00469923  | <a href="https://www.genecards.org/cgi-bin/carddisp.pl?gene=CCNA2">https://www.genecards.org/cgi-bin/carddisp.pl?gene=CCNA2</a>     |
| MSBP1   | Minisatellite Binding Protein 1                                          | Protein Coding | 6  | GC00U990213 | 3.003406048 | <a href="https://www.genecards.org/cgi-bin/carddisp.pl?gene=MSBP1">https://www.genecards.org/cgi-bin/carddisp.pl?gene=MSBP1</a>     |
| EIF4B   | Eukaryotic Translation Initiation Factor 4B                              | Protein Coding | 48 | GC12P053006 | 3.003115654 | <a href="https://www.genecards.org/cgi-bin/carddisp.pl?gene=EIF4B">https://www.genecards.org/cgi-bin/carddisp.pl?gene=EIF4B</a>     |
| IYD     | Iodotyrosine Deiodinase                                                  | Protein Coding | 47 | GC06P150368 | 3.001287222 | <a href="https://www.genecards.org/cgi-bin/carddisp.pl?gene=IYD">https://www.genecards.org/cgi-bin/carddisp.pl?gene=IYD</a>         |
| NSF     | N-Ethylmaleimide Sensitive Factor, Vesicle Fusing ATPase                 | Protein Coding | 51 | GC17P046590 | 2.995528221 | <a href="https://www.genecards.org/cgi-bin/carddisp.pl?gene=NSF">https://www.genecards.org/cgi-bin/carddisp.pl?gene=NSF</a>         |
| LPCAT2  | Lysophosphatidylcholine Acyltransferase 2                                | Protein Coding | 48 | GC16P055510 | 2.994910717 | <a href="https://www.genecards.org/cgi-bin/carddisp.pl?gene=LPCAT2">https://www.genecards.org/cgi-bin/carddisp.pl?gene=LPCAT2</a>   |
| MGAT5   | Alpha-1,6-Mannosylglycoprotein<br>6-Beta-N-Acetylglucosaminyltransferase | Protein Coding | 48 | GC02P134119 | 2.994092226 | <a href="https://www.genecards.org/cgi-bin/carddisp.pl?gene=MGAT5">https://www.genecards.org/cgi-bin/carddisp.pl?gene=MGAT5</a>     |



|         |                                               |                |    |             |             |                                                                                                                                     |
|---------|-----------------------------------------------|----------------|----|-------------|-------------|-------------------------------------------------------------------------------------------------------------------------------------|
| TGFB1   | Transforming Growth Factor Beta Induced       | Protein Coding | 53 | GC05P136027 | 2.993627071 | <a href="https://www.genecards.org/cgi-bin/carddisp.pl?gene=TGFB1">https://www.genecards.org/cgi-bin/carddisp.pl?gene=TGFB1</a>     |
| TGIF1   | TGFB Induced Factor Homeobox 1                | Protein Coding | 53 | GC18P003411 | 2.990906    | <a href="https://www.genecards.org/cgi-bin/carddisp.pl?gene=TGIF1">https://www.genecards.org/cgi-bin/carddisp.pl?gene=TGIF1</a>     |
| ARHGAP1 | Rho GTPase Activating Protein 1               | Protein Coding | 49 | GC11M099353 | 2.990369797 | <a href="https://www.genecards.org/cgi-bin/carddisp.pl?gene=ARHGAP1">https://www.genecards.org/cgi-bin/carddisp.pl?gene=ARHGAP1</a> |
| FHL2    | Four And A Half LIM Domains 2                 | Protein Coding | 53 | GC02M105357 | 2.988026142 | <a href="https://www.genecards.org/cgi-bin/carddisp.pl?gene=FHL2">https://www.genecards.org/cgi-bin/carddisp.pl?gene=FHL2</a>       |
| ELOVL3  | ELOVL Fatty Acid Elongase 3                   | Protein Coding | 41 | GC10P102226 | 2.985116005 | <a href="https://www.genecards.org/cgi-bin/carddisp.pl?gene=ELOVL3">https://www.genecards.org/cgi-bin/carddisp.pl?gene=ELOVL3</a>   |
| GRM5    | Glutamate Metabotropic Receptor 5             | Protein Coding | 53 | GC11M088504 | 2.984042168 | <a href="https://www.genecards.org/cgi-bin/carddisp.pl?gene=GRM5">https://www.genecards.org/cgi-bin/carddisp.pl?gene=GRM5</a>       |
| HDAC6   | Histone Deacetylase 6                         | Protein Coding | 61 | GC0XP048801 | 2.98350811  | <a href="https://www.genecards.org/cgi-bin/carddisp.pl?gene=HDAC6">https://www.genecards.org/cgi-bin/carddisp.pl?gene=HDAC6</a>     |
| AQP9    | Aquaporin 9                                   | Protein Coding | 49 | GC15P058138 | 2.982341766 | <a href="https://www.genecards.org/cgi-bin/carddisp.pl?gene=AQP9">https://www.genecards.org/cgi-bin/carddisp.pl?gene=AQP9</a>       |
| CD274   | CD274 Molecule                                | Protein Coding | 52 | GC09P005450 | 2.978649139 | <a href="https://www.genecards.org/cgi-bin/carddisp.pl?gene=CD274">https://www.genecards.org/cgi-bin/carddisp.pl?gene=CD274</a>     |
| LNPEP   | Leucyl And Cystinyl Aminopeptidase            | Protein Coding | 52 | GC05P096935 | 2.976631403 | <a href="https://www.genecards.org/cgi-bin/carddisp.pl?gene=LNPEP">https://www.genecards.org/cgi-bin/carddisp.pl?gene=LNPEP</a>     |
| L1CAM   | L1 Cell Adhesion Molecule                     | Protein Coding | 54 | GC0XM153864 | 2.975522995 | <a href="https://www.genecards.org/cgi-bin/carddisp.pl?gene=L1CAM">https://www.genecards.org/cgi-bin/carddisp.pl?gene=L1CAM</a>     |
| PDPK1   | 3-Phosphoinositide Dependent Protein Kinase 1 | Protein Coding | 55 | GC16P002537 | 2.972537518 | <a href="https://www.genecards.org/cgi-bin/carddisp.pl?gene=PDPK1">https://www.genecards.org/cgi-bin/carddisp.pl?gene=PDPK1</a>     |
| DES     | Desmin                                        | Protein Coding | 55 | GC02P219418 | 2.970502853 | <a href="https://www.genecards.org/cgi-bin/carddisp.pl?gene=DES">https://www.genecards.org/cgi-bin/carddisp.pl?gene=DES</a>         |
| PPBP    | Pro-Platelet Basic Protein                    | Protein Coding | 49 | GC04M073986 | 2.964915276 | <a href="https://www.genecards.org/cgi-bin/carddisp.pl?gene=PPBP">https://www.genecards.org/cgi-bin/carddisp.pl?gene=PPBP</a>       |
| BLM     | BLM RecQ Like Helicase                        | Protein Coding | 56 | GC15P090717 | 2.963648319 | <a href="https://www.genecards.org/cgi-bin/carddisp.pl?gene=BLM">https://www.genecards.org/cgi-bin/carddisp.pl?gene=BLM</a>         |

|        |                                                      |                |    |             |             |                                                                                                                                   |
|--------|------------------------------------------------------|----------------|----|-------------|-------------|-----------------------------------------------------------------------------------------------------------------------------------|
| S100B  | S100 Calcium Binding Protein B                       | Protein Coding | 51 | GC21M051379 | 2.961237431 | <a href="https://www.genecards.org/cgi-bin/carddisp.pl?gene=S100B">https://www.genecards.org/cgi-bin/carddisp.pl?gene=S100B</a>   |
| RAB6A  | RAB6A, Member RAS Oncogene Family                    | Protein Coding | 47 | GC11M099960 | 2.959060907 | <a href="https://www.genecards.org/cgi-bin/carddisp.pl?gene=RAB6A">https://www.genecards.org/cgi-bin/carddisp.pl?gene=RAB6A</a>   |
| HELLS  | Helicase, Lymphoid Specific                          | Protein Coding | 52 | GC10P094814 | 2.958610773 | <a href="https://www.genecards.org/cgi-bin/carddisp.pl?gene=HELLS">https://www.genecards.org/cgi-bin/carddisp.pl?gene=HELLS</a>   |
| PLAUR  | Plasminogen Activator, Urokinase Receptor            | Protein Coding | 52 | GC19M043646 | 2.953312874 | <a href="https://www.genecards.org/cgi-bin/carddisp.pl?gene=PLAUR">https://www.genecards.org/cgi-bin/carddisp.pl?gene=PLAUR</a>   |
| ATF2   | Activating Transcription Factor 2                    | Protein Coding | 54 | GC02M175072 | 2.950472832 | <a href="https://www.genecards.org/cgi-bin/carddisp.pl?gene=ATF2">https://www.genecards.org/cgi-bin/carddisp.pl?gene=ATF2</a>     |
| PTX3   | Pentraxin 3                                          | Protein Coding | 50 | GC03P157436 | 2.950279713 | <a href="https://www.genecards.org/cgi-bin/carddisp.pl?gene=PTX3">https://www.genecards.org/cgi-bin/carddisp.pl?gene=PTX3</a>     |
| CCND3  | Cyclin D3                                            | Protein Coding | 53 | GC06M041934 | 2.947537661 | <a href="https://www.genecards.org/cgi-bin/carddisp.pl?gene=CCND3">https://www.genecards.org/cgi-bin/carddisp.pl?gene=CCND3</a>   |
| ACSBG2 | Acyl-CoA Synthetase Bubblegum Family Member 2        | Protein Coding | 44 | GC19P006135 | 2.947389603 | <a href="https://www.genecards.org/cgi-bin/carddisp.pl?gene=ACSBG2">https://www.genecards.org/cgi-bin/carddisp.pl?gene=ACSBG2</a> |
| ITGA5  | Integrin Subunit Alpha 5                             | Protein Coding | 56 | GC12M055005 | 2.947187424 | <a href="https://www.genecards.org/cgi-bin/carddisp.pl?gene=ITGA5">https://www.genecards.org/cgi-bin/carddisp.pl?gene=ITGA5</a>   |
| MBOAT2 | Membrane Bound O-Acyltransferase Domain Containing 2 | Protein Coding | 42 | GC02M008853 | 2.943485022 | <a href="https://www.genecards.org/cgi-bin/carddisp.pl?gene=MBOAT2">https://www.genecards.org/cgi-bin/carddisp.pl?gene=MBOAT2</a> |
| PTPA   | Protein Phosphatase 2 Phosphatase Activator          | Protein Coding | 50 | GC09P129119 | 2.941158295 | <a href="https://www.genecards.org/cgi-bin/carddisp.pl?gene=PTPA">https://www.genecards.org/cgi-bin/carddisp.pl?gene=PTPA</a>     |
| THOP1  | Thimet Oligopeptidase 1                              | Protein Coding | 48 | GC19P002785 | 2.939968348 | <a href="https://www.genecards.org/cgi-bin/carddisp.pl?gene=THOP1">https://www.genecards.org/cgi-bin/carddisp.pl?gene=THOP1</a>   |
| ITGA2  | Integrin Subunit Alpha 2                             | Protein Coding | 53 | GC05P052989 | 2.937961817 | <a href="https://www.genecards.org/cgi-bin/carddisp.pl?gene=ITGA2">https://www.genecards.org/cgi-bin/carddisp.pl?gene=ITGA2</a>   |
| BCL6   | BCL6 Transcription Repressor                         | Protein Coding | 52 | GC03M187721 | 2.929877281 | <a href="https://www.genecards.org/cgi-bin/carddisp.pl?gene=BCL6">https://www.genecards.org/cgi-bin/carddisp.pl?gene=BCL6</a>     |
| NPY4R  | Neuropeptide Y Receptor Y4                           | Protein Coding | 46 | GC10M046461 | 2.929151297 | <a href="https://www.genecards.org/cgi-bin/carddisp.pl?gene=NPY4R">https://www.genecards.org/cgi-bin/carddisp.pl?gene=NPY4R</a>   |

|          |                                                    |                |    |             |             |                                                                                                                                       |
|----------|----------------------------------------------------|----------------|----|-------------|-------------|---------------------------------------------------------------------------------------------------------------------------------------|
| BAIAP2L1 | BAR/IMD Domain Containing Adaptor Protein 2 Like 1 | Protein Coding | 46 | GC07M098294 | 2.926037312 | <a href="https://www.genecards.org/cgi-bin/carddisp.pl?gene=BAIAP2L1">https://www.genecards.org/cgi-bin/carddisp.pl?gene=BAIAP2L1</a> |
| MAPK9    | Mitogen-Activated Protein Kinase 9                 | Protein Coding | 56 | GC05M180263 | 2.924700737 | <a href="https://www.genecards.org/cgi-bin/carddisp.pl?gene=MAPK9">https://www.genecards.org/cgi-bin/carddisp.pl?gene=MAPK9</a>       |
| PRKD1    | Protein Kinase D1                                  | Protein Coding | 56 | GC14M029576 | 2.923382521 | <a href="https://www.genecards.org/cgi-bin/carddisp.pl?gene=PRKD1">https://www.genecards.org/cgi-bin/carddisp.pl?gene=PRKD1</a>       |
| ADAM17   | ADAM Metallopeptidase Domain 17                    | Protein Coding | 58 | GC02M009488 | 2.92128253  | <a href="https://www.genecards.org/cgi-bin/carddisp.pl?gene=ADAM17">https://www.genecards.org/cgi-bin/carddisp.pl?gene=ADAM17</a>     |
| PRKCE    | Protein Kinase C Epsilon                           | Protein Coding | 55 | GC02P045651 | 2.918762207 | <a href="https://www.genecards.org/cgi-bin/carddisp.pl?gene=PRKCE">https://www.genecards.org/cgi-bin/carddisp.pl?gene=PRKCE</a>       |
| CBX5     | Chromobox 5                                        | Protein Coding | 50 | GC12M054230 | 2.918049335 | <a href="https://www.genecards.org/cgi-bin/carddisp.pl?gene=CBX5">https://www.genecards.org/cgi-bin/carddisp.pl?gene=CBX5</a>         |
| CRYAB    | Crystallin Alpha B                                 | Protein Coding | 53 | GC11M111908 | 2.917105913 | <a href="https://www.genecards.org/cgi-bin/carddisp.pl?gene=CRYAB">https://www.genecards.org/cgi-bin/carddisp.pl?gene=CRYAB</a>       |
| WARS2    | Tryptophanyl TRNA Synthetase 2, Mitochondrial      | Protein Coding | 51 | GC01M119031 | 2.916296005 | <a href="https://www.genecards.org/cgi-bin/carddisp.pl?gene=WARS2">https://www.genecards.org/cgi-bin/carddisp.pl?gene=WARS2</a>       |
| SLC22A7  | Solute Carrier Family 22 Member 7                  | Protein Coding | 48 | GC06P092349 | 2.914253712 | <a href="https://www.genecards.org/cgi-bin/carddisp.pl?gene=SLC22A7">https://www.genecards.org/cgi-bin/carddisp.pl?gene=SLC22A7</a>   |
| ADORA1   | Adenosine A1 Receptor                              | Protein Coding | 53 | GC01P203090 | 2.91362977  | <a href="https://www.genecards.org/cgi-bin/carddisp.pl?gene=ADORA1">https://www.genecards.org/cgi-bin/carddisp.pl?gene=ADORA1</a>     |
| VTN      | Vitronectin                                        | Protein Coding | 51 | GC17M051189 | 2.913039684 | <a href="https://www.genecards.org/cgi-bin/carddisp.pl?gene=VTN">https://www.genecards.org/cgi-bin/carddisp.pl?gene=VTN</a>           |
| PTPN3    | Protein Tyrosine Phosphatase Non-Receptor Type 3   | Protein Coding | 51 | GC09M109375 | 2.905050516 | <a href="https://www.genecards.org/cgi-bin/carddisp.pl?gene=PTPN3">https://www.genecards.org/cgi-bin/carddisp.pl?gene=PTPN3</a>       |
| SULT1A4  | Sulfotransferase Family 1A Member 4                | Protein Coding | 37 | GC16P042717 | 2.904377937 | <a href="https://www.genecards.org/cgi-bin/carddisp.pl?gene=SULT1A4">https://www.genecards.org/cgi-bin/carddisp.pl?gene=SULT1A4</a>   |
| TIMP3    | TIMP Metallopeptidase Inhibitor 3                  | Protein Coding | 50 | GC22P044970 | 2.901615143 | <a href="https://www.genecards.org/cgi-bin/carddisp.pl?gene=TIMP3">https://www.genecards.org/cgi-bin/carddisp.pl?gene=TIMP3</a>       |
| SP3      | Sp3 Transcription Factor                           | Protein Coding | 50 | GC02M173882 | 2.90152359  | <a href="https://www.genecards.org/cgi-bin/carddisp.pl?gene=SP3">https://www.genecards.org/cgi-bin/carddisp.pl?gene=SP3</a>           |

|         |                                                |                |    |             |             |                                                                                                                                     |
|---------|------------------------------------------------|----------------|----|-------------|-------------|-------------------------------------------------------------------------------------------------------------------------------------|
| PLK1    | Polo Like Kinase 1                             | Protein Coding | 58 | GC16P024566 | 2.901216269 | <a href="https://www.genecards.org/cgi-bin/carddisp.pl?gene=PLK1">https://www.genecards.org/cgi-bin/carddisp.pl?gene=PLK1</a>       |
| CSNK1A1 | Casein Kinase 1 Alpha 1                        | Protein Coding | 55 | GC05M149492 | 2.89967227  | <a href="https://www.genecards.org/cgi-bin/carddisp.pl?gene=CSNK1A1">https://www.genecards.org/cgi-bin/carddisp.pl?gene=CSNK1A1</a> |
| GRB14   | Growth Factor Receptor Bound Protein 14        | Protein Coding | 50 | GC02M164492 | 2.891060591 | <a href="https://www.genecards.org/cgi-bin/carddisp.pl?gene=GRB14">https://www.genecards.org/cgi-bin/carddisp.pl?gene=GRB14</a>     |
| CXCR2   | C-X-C Motif Chemokine Receptor 2               | Protein Coding | 57 | GC02P218125 | 2.887881041 | <a href="https://www.genecards.org/cgi-bin/carddisp.pl?gene=CXCR2">https://www.genecards.org/cgi-bin/carddisp.pl?gene=CXCR2</a>     |
| ITK     | IL2 Inducible T Cell Kinase                    | Protein Coding | 59 | GC05P157158 | 2.886702299 | <a href="https://www.genecards.org/cgi-bin/carddisp.pl?gene=ITK">https://www.genecards.org/cgi-bin/carddisp.pl?gene=ITK</a>         |
| GNAO1   | G Protein Subunit Alpha O1                     | Protein Coding | 52 | GC16P056231 | 2.884417772 | <a href="https://www.genecards.org/cgi-bin/carddisp.pl?gene=GNAO1">https://www.genecards.org/cgi-bin/carddisp.pl?gene=GNAO1</a>     |
| AVPR2   | Arginine Vasopressin Receptor 2                | Protein Coding | 53 | GC0XP153902 | 2.882421732 | <a href="https://www.genecards.org/cgi-bin/carddisp.pl?gene=AVPR2">https://www.genecards.org/cgi-bin/carddisp.pl?gene=AVPR2</a>     |
| SLC12A2 | Solute Carrier Family 12 Member 2              | Protein Coding | 56 | GC05P128083 | 2.881573439 | <a href="https://www.genecards.org/cgi-bin/carddisp.pl?gene=SLC12A2">https://www.genecards.org/cgi-bin/carddisp.pl?gene=SLC12A2</a> |
| CXCR1   | C-X-C Motif Chemokine Receptor 1               | Protein Coding | 50 | GC02M218162 | 2.877828598 | <a href="https://www.genecards.org/cgi-bin/carddisp.pl?gene=CXCR1">https://www.genecards.org/cgi-bin/carddisp.pl?gene=CXCR1</a>     |
| TRAF3   | TNF Receptor Associated Factor 3               | Protein Coding | 53 | GC14P110622 | 2.876880646 | <a href="https://www.genecards.org/cgi-bin/carddisp.pl?gene=TRAF3">https://www.genecards.org/cgi-bin/carddisp.pl?gene=TRAF3</a>     |
| BIRC3   | Baculoviral IAP Repeat Containing 3            | Protein Coding | 53 | GC11P102317 | 2.874317646 | <a href="https://www.genecards.org/cgi-bin/carddisp.pl?gene=BIRC3">https://www.genecards.org/cgi-bin/carddisp.pl?gene=BIRC3</a>     |
| EPHA4   | EPH Receptor A4                                | Protein Coding | 57 | GC02M221418 | 2.871276379 | <a href="https://www.genecards.org/cgi-bin/carddisp.pl?gene=EPHA4">https://www.genecards.org/cgi-bin/carddisp.pl?gene=EPHA4</a>     |
| MYLK    | Myosin Light Chain Kinase                      | Protein Coding | 57 | GC03M123610 | 2.868624449 | <a href="https://www.genecards.org/cgi-bin/carddisp.pl?gene=MYLK">https://www.genecards.org/cgi-bin/carddisp.pl?gene=MYLK</a>       |
| AGPAT5  | 1-Acylglycerol-3-Phosphate O-Acyltransferase 5 | Protein Coding | 48 | GC08P006708 | 2.867540121 | <a href="https://www.genecards.org/cgi-bin/carddisp.pl?gene=AGPAT5">https://www.genecards.org/cgi-bin/carddisp.pl?gene=AGPAT5</a>   |
| CDO1    | Cysteine Dioxygenase Type 1                    | Protein Coding | 47 | GC05M115804 | 2.867174625 | <a href="https://www.genecards.org/cgi-bin/carddisp.pl?gene=CDO1">https://www.genecards.org/cgi-bin/carddisp.pl?gene=CDO1</a>       |

|        |                                                |                |    |             |             |                                                                                                                                   |
|--------|------------------------------------------------|----------------|----|-------------|-------------|-----------------------------------------------------------------------------------------------------------------------------------|
| FURIN  | Furin, Paired Basic Amino Acid Cleaving Enzyme | Protein Coding | 54 | GC15P090868 | 2.866317272 | <a href="https://www.genecards.org/cgi-bin/carddisp.pl?gene=FURIN">https://www.genecards.org/cgi-bin/carddisp.pl?gene=FURIN</a>   |
| INHA   | Inhibin Subunit Alpha                          | Protein Coding | 49 | GC02P219569 | 2.866305113 | <a href="https://www.genecards.org/cgi-bin/carddisp.pl?gene=INHA">https://www.genecards.org/cgi-bin/carddisp.pl?gene=INHA</a>     |
| CFL1   | Cofilin 1                                      | Protein Coding | 52 | GC11M065823 | 2.865230083 | <a href="https://www.genecards.org/cgi-bin/carddisp.pl?gene=CFL1">https://www.genecards.org/cgi-bin/carddisp.pl?gene=CFL1</a>     |
| MCL1   | MCL1 Apoptosis Regulator, BCL2 Family Member   | Protein Coding | 55 | GC01M152731 | 2.86384058  | <a href="https://www.genecards.org/cgi-bin/carddisp.pl?gene=MCL1">https://www.genecards.org/cgi-bin/carddisp.pl?gene=MCL1</a>     |
| GLYAT  | Glycine-N-Acyltransferase                      | Protein Coding | 46 | GC11M099446 | 2.863129139 | <a href="https://www.genecards.org/cgi-bin/carddisp.pl?gene=GLYAT">https://www.genecards.org/cgi-bin/carddisp.pl?gene=GLYAT</a>   |
| HBG1   | Hemoglobin Subunit Gamma 1                     | Protein Coding | 47 | GC11M006834 | 2.862811327 | <a href="https://www.genecards.org/cgi-bin/carddisp.pl?gene=HBG1">https://www.genecards.org/cgi-bin/carddisp.pl?gene=HBG1</a>     |
| A2M    | Alpha-2-Macroglobulin                          | Protein Coding | 52 | GC12M009067 | 2.858912945 | <a href="https://www.genecards.org/cgi-bin/carddisp.pl?gene=A2M">https://www.genecards.org/cgi-bin/carddisp.pl?gene=A2M</a>       |
| PTGER4 | Prostaglandin E Receptor 4                     | Protein Coding | 52 | GC05P040679 | 2.858474731 | <a href="https://www.genecards.org/cgi-bin/carddisp.pl?gene=PTGER4">https://www.genecards.org/cgi-bin/carddisp.pl?gene=PTGER4</a> |
| PCNA   | Proliferating Cell Nuclear Antigen             | Protein Coding | 57 | GC20M005114 | 2.857391119 | <a href="https://www.genecards.org/cgi-bin/carddisp.pl?gene=PCNA">https://www.genecards.org/cgi-bin/carddisp.pl?gene=PCNA</a>     |
| ITGAL  | Integrin Subunit Alpha L                       | Protein Coding | 53 | GC16P030472 | 2.857074738 | <a href="https://www.genecards.org/cgi-bin/carddisp.pl?gene=ITGAL">https://www.genecards.org/cgi-bin/carddisp.pl?gene=ITGAL</a>   |
| FCGR3A | Fc Gamma Receptor IIIa                         | Protein Coding | 53 | GC01M161541 | 2.850360155 | <a href="https://www.genecards.org/cgi-bin/carddisp.pl?gene=FCGR3A">https://www.genecards.org/cgi-bin/carddisp.pl?gene=FCGR3A</a> |
| IGFBP6 | Insulin Like Growth Factor Binding Protein 6   | Protein Coding | 50 | GC12P053097 | 2.844712496 | <a href="https://www.genecards.org/cgi-bin/carddisp.pl?gene=IGFBP6">https://www.genecards.org/cgi-bin/carddisp.pl?gene=IGFBP6</a> |
| TXN2   | Thioredoxin 2                                  | Protein Coding | 50 | GC22M036467 | 2.843144894 | <a href="https://www.genecards.org/cgi-bin/carddisp.pl?gene=TXN2">https://www.genecards.org/cgi-bin/carddisp.pl?gene=TXN2</a>     |
| CBX1   | Chromobox 1                                    | Protein Coding | 48 | GC17M048070 | 2.839906454 | <a href="https://www.genecards.org/cgi-bin/carddisp.pl?gene=CBX1">https://www.genecards.org/cgi-bin/carddisp.pl?gene=CBX1</a>     |
| PIAS4  | Protein Inhibitor Of Activated STAT 4          | Protein Coding | 48 | GC19P004007 | 2.83911252  | <a href="https://www.genecards.org/cgi-bin/carddisp.pl?gene=PIAS4">https://www.genecards.org/cgi-bin/carddisp.pl?gene=PIAS4</a>   |

|           |                                                          |                |    |             |             |                                                                                                                                         |
|-----------|----------------------------------------------------------|----------------|----|-------------|-------------|-----------------------------------------------------------------------------------------------------------------------------------------|
| MMP13     | Matrix Metallopeptidase 13                               | Protein Coding | 57 | GC11M102942 | 2.838996172 | <a href="https://www.genecards.org/cgi-bin/carddisp.pl?gene=MMP13">https://www.genecards.org/cgi-bin/carddisp.pl?gene=MMP13</a>         |
| MYCN      | MYCN Proto-Oncogene, BHLH Transcription Factor           | Protein Coding | 53 | GC02P015954 | 2.838101864 | <a href="https://www.genecards.org/cgi-bin/carddisp.pl?gene=MYCN">https://www.genecards.org/cgi-bin/carddisp.pl?gene=MYCN</a>           |
| NPY1R     | Neuropeptide Y Receptor Y1                               | Protein Coding | 53 | GC04M163323 | 2.837838888 | <a href="https://www.genecards.org/cgi-bin/carddisp.pl?gene=NPY1R">https://www.genecards.org/cgi-bin/carddisp.pl?gene=NPY1R</a>         |
| TNFRSF10A | TNF Receptor Superfamily Member 10a                      | Protein Coding | 52 | GC08M023190 | 2.837100029 | <a href="https://www.genecards.org/cgi-bin/carddisp.pl?gene=TNFRSF10A">https://www.genecards.org/cgi-bin/carddisp.pl?gene=TNFRSF10A</a> |
| KRIT1     | KRIT1 Ankyrin Repeat Containing                          | Protein Coding | 48 | GC07M092198 | 2.832033157 | <a href="https://www.genecards.org/cgi-bin/carddisp.pl?gene=KRIT1">https://www.genecards.org/cgi-bin/carddisp.pl?gene=KRIT1</a>         |
| SULT1C4   | Sulfotransferase Family 1C Member 4                      | Protein Coding | 43 | GC02P108377 | 2.830641747 | <a href="https://www.genecards.org/cgi-bin/carddisp.pl?gene=SULT1C4">https://www.genecards.org/cgi-bin/carddisp.pl?gene=SULT1C4</a>     |
| MEFV      | MEFV Innate Immunity Regulator, Pyrin                    | Protein Coding | 51 | GC16M008228 | 2.823741913 | <a href="https://www.genecards.org/cgi-bin/carddisp.pl?gene=MEFV">https://www.genecards.org/cgi-bin/carddisp.pl?gene=MEFV</a>           |
| PREP      | Prolyl Endopeptidase                                     | Protein Coding | 48 | GC06M105277 | 2.822573662 | <a href="https://www.genecards.org/cgi-bin/carddisp.pl?gene=PREP">https://www.genecards.org/cgi-bin/carddisp.pl?gene=PREP</a>           |
| NF2       | NF2, Moesin-Ezrin-Radixin Like (MERLIN) Tumor Suppressor | Protein Coding | 55 | GC22P029603 | 2.821547747 | <a href="https://www.genecards.org/cgi-bin/carddisp.pl?gene=NF2">https://www.genecards.org/cgi-bin/carddisp.pl?gene=NF2</a>             |
| S100A8    | S100 Calcium Binding Protein A8                          | Protein Coding | 48 | GC01M153391 | 2.820464373 | <a href="https://www.genecards.org/cgi-bin/carddisp.pl?gene=S100A8">https://www.genecards.org/cgi-bin/carddisp.pl?gene=S100A8</a>       |
| ATR       | ATR Serine/Threonine Kinase                              | Protein Coding | 59 | GC03M142449 | 2.820094347 | <a href="https://www.genecards.org/cgi-bin/carddisp.pl?gene=ATR">https://www.genecards.org/cgi-bin/carddisp.pl?gene=ATR</a>             |
| CCL4      | C-C Motif Chemokine Ligand 4                             | Protein Coding | 47 | GC17P036103 | 2.819907188 | <a href="https://www.genecards.org/cgi-bin/carddisp.pl?gene=CCL4">https://www.genecards.org/cgi-bin/carddisp.pl?gene=CCL4</a>           |
| SERPINB1  | Serpin Family B Member 1                                 | Protein Coding | 47 | GC06M002852 | 2.815357924 | <a href="https://www.genecards.org/cgi-bin/carddisp.pl?gene=SERPINB1">https://www.genecards.org/cgi-bin/carddisp.pl?gene=SERPINB1</a>   |
| LIMK1     | LIM Domain Kinase 1                                      | Protein Coding | 56 | GC07P074082 | 2.813730001 | <a href="https://www.genecards.org/cgi-bin/carddisp.pl?gene=LIMK1">https://www.genecards.org/cgi-bin/carddisp.pl?gene=LIMK1</a>         |
| PSMC4     | Proteasome 26S Subunit, ATPase 4                         | Protein Coding | 47 | GC19P072849 | 2.812140942 | <a href="https://www.genecards.org/cgi-bin/carddisp.pl?gene=PSMC4">https://www.genecards.org/cgi-bin/carddisp.pl?gene=PSMC4</a>         |

|        |                                                                            |                |    |             |             |                                                                                                                                   |
|--------|----------------------------------------------------------------------------|----------------|----|-------------|-------------|-----------------------------------------------------------------------------------------------------------------------------------|
| YWHAH  | Tyrosine 3-Monooxygenase/Tryptophan 5-Monooxygenase Activation Protein Eta | Protein Coding | 53 | GC22P031944 | 2.810483932 | <a href="https://www.genecards.org/cgi-bin/carddisp.pl?gene=YWHAH">https://www.genecards.org/cgi-bin/carddisp.pl?gene=YWHAH</a>   |
| PECAM1 | Platelet And Endothelial Cell Adhesion Molecule 1                          | Protein Coding | 47 | GC17M064319 | 2.80936718  | <a href="https://www.genecards.org/cgi-bin/carddisp.pl?gene=PECAM1">https://www.genecards.org/cgi-bin/carddisp.pl?gene=PECAM1</a> |
| FADD   | Fas Associated Via Death Domain                                            | Protein Coding | 52 | GC11P070203 | 2.808387756 | <a href="https://www.genecards.org/cgi-bin/carddisp.pl?gene=FADD">https://www.genecards.org/cgi-bin/carddisp.pl?gene=FADD</a>     |
| AKAP13 | A-Kinase Anchoring Protein 13                                              | Protein Coding | 49 | GC15P123897 | 2.804094791 | <a href="https://www.genecards.org/cgi-bin/carddisp.pl?gene=AKAP13">https://www.genecards.org/cgi-bin/carddisp.pl?gene=AKAP13</a> |
| GRM1   | Glutamate Metabotropic Receptor 1                                          | Protein Coding | 57 | GC06P145973 | 2.799233913 | <a href="https://www.genecards.org/cgi-bin/carddisp.pl?gene=GRM1">https://www.genecards.org/cgi-bin/carddisp.pl?gene=GRM1</a>     |
| FEN1   | Flap Structure-Specific Endonuclease 1                                     | Protein Coding | 53 | GC11P061793 | 2.798650742 | <a href="https://www.genecards.org/cgi-bin/carddisp.pl?gene=FEN1">https://www.genecards.org/cgi-bin/carddisp.pl?gene=FEN1</a>     |
| SLC1A7 | Solute Carrier Family 1 Member 7                                           | Protein Coding | 50 | GC01M053087 | 2.797800779 | <a href="https://www.genecards.org/cgi-bin/carddisp.pl?gene=SLC1A7">https://www.genecards.org/cgi-bin/carddisp.pl?gene=SLC1A7</a> |
| MTMR2  | Myotubularin Related Protein 2                                             | Protein Coding | 52 | GC11M100315 | 2.797639847 | <a href="https://www.genecards.org/cgi-bin/carddisp.pl?gene=MTMR2">https://www.genecards.org/cgi-bin/carddisp.pl?gene=MTMR2</a>   |
| ERBB3  | Erb-B2 Receptor Tyrosine Kinase 3                                          | Protein Coding | 60 | GC12P057479 | 2.795985222 | <a href="https://www.genecards.org/cgi-bin/carddisp.pl?gene=ERBB3">https://www.genecards.org/cgi-bin/carddisp.pl?gene=ERBB3</a>   |
| CXCL12 | C-X-C Motif Chemokine Ligand 12                                            | Protein Coding | 51 | GC10M044370 | 2.794643164 | <a href="https://www.genecards.org/cgi-bin/carddisp.pl?gene=CXCL12">https://www.genecards.org/cgi-bin/carddisp.pl?gene=CXCL12</a> |
| IBSP   | Integrin Binding Sialoprotein                                              | Protein Coding | 45 | GC04P087799 | 2.793280363 | <a href="https://www.genecards.org/cgi-bin/carddisp.pl?gene=IBSP">https://www.genecards.org/cgi-bin/carddisp.pl?gene=IBSP</a>     |
| CIITA  | Class II Major Histocompatibility Complex Transactivator                   | Protein Coding | 51 | GC16P013730 | 2.792242765 | <a href="https://www.genecards.org/cgi-bin/carddisp.pl?gene=CIITA">https://www.genecards.org/cgi-bin/carddisp.pl?gene=CIITA</a>   |
| ACP2   | Acid Phosphatase 2, Lysosomal                                              | Protein Coding | 49 | GC11M099364 | 2.791862249 | <a href="https://www.genecards.org/cgi-bin/carddisp.pl?gene=ACP2">https://www.genecards.org/cgi-bin/carddisp.pl?gene=ACP2</a>     |
| CKS1B  | CDC28 Protein Kinase Regulatory Subunit 1B                                 | Protein Coding | 48 | GC01P154974 | 2.788207769 | <a href="https://www.genecards.org/cgi-bin/carddisp.pl?gene=CKS1B">https://www.genecards.org/cgi-bin/carddisp.pl?gene=CKS1B</a>   |
| P2RY12 | Purinergic Receptor P2Y12                                                  | Protein Coding | 55 | GC03M151336 | 2.787358761 | <a href="https://www.genecards.org/cgi-bin/carddisp.pl?gene=P2RY12">https://www.genecards.org/cgi-bin/carddisp.pl?gene=P2RY12</a> |

|         |                                                     |                |    |             |             |                                                                                                                                     |
|---------|-----------------------------------------------------|----------------|----|-------------|-------------|-------------------------------------------------------------------------------------------------------------------------------------|
| RPS6KA1 | Ribosomal Protein S6 Kinase A1                      | Protein Coding | 57 | GC01P026540 | 2.782677889 | <a href="https://www.genecards.org/cgi-bin/carddisp.pl?gene=RPS6KA1">https://www.genecards.org/cgi-bin/carddisp.pl?gene=RPS6KA1</a> |
| SULT1C3 | Sulfotransferase Family 1C Member 3                 | Protein Coding | 41 | GC02P108230 | 2.780189991 | <a href="https://www.genecards.org/cgi-bin/carddisp.pl?gene=SULT1C3">https://www.genecards.org/cgi-bin/carddisp.pl?gene=SULT1C3</a> |
| MICB    | MHC Class I Polypeptide-Related Sequence B          | Protein Coding | 47 | GC06P092149 | 2.778273106 | <a href="https://www.genecards.org/cgi-bin/carddisp.pl?gene=MICB">https://www.genecards.org/cgi-bin/carddisp.pl?gene=MICB</a>       |
| ST3GAL5 | ST3 Beta-Galactoside Alpha-2,3-Sialyltransferase 5  | Protein Coding | 53 | GC02M085839 | 2.777647018 | <a href="https://www.genecards.org/cgi-bin/carddisp.pl?gene=ST3GAL5">https://www.genecards.org/cgi-bin/carddisp.pl?gene=ST3GAL5</a> |
| PIEZO1  | Piezo Type Mechanosensitive Ion Channel Component 1 | Protein Coding | 47 | GC16M088715 | 2.772140026 | <a href="https://www.genecards.org/cgi-bin/carddisp.pl?gene=PIEZO1">https://www.genecards.org/cgi-bin/carddisp.pl?gene=PIEZO1</a>   |
| MCAT    | Malonyl-CoA-Acyl Carrier Protein Transacylase       | Protein Coding | 48 | GC22M043132 | 2.77162981  | <a href="https://www.genecards.org/cgi-bin/carddisp.pl?gene=MCAT">https://www.genecards.org/cgi-bin/carddisp.pl?gene=MCAT</a>       |
| HIBADH  | 3-Hydroxyisobutyrate Dehydrogenase                  | Protein Coding | 47 | GC07M027525 | 2.771614313 | <a href="https://www.genecards.org/cgi-bin/carddisp.pl?gene=HIBADH">https://www.genecards.org/cgi-bin/carddisp.pl?gene=HIBADH</a>   |
| SRSF2   | Serine And Arginine Rich Splicing Factor 2          | Protein Coding | 47 | GC17M076734 | 2.771296501 | <a href="https://www.genecards.org/cgi-bin/carddisp.pl?gene=SRSF2">https://www.genecards.org/cgi-bin/carddisp.pl?gene=SRSF2</a>     |
| ETS1    | ETS Proto-Oncogene 1, Transcription Factor          | Protein Coding | 53 | GC11M128458 | 2.770843744 | <a href="https://www.genecards.org/cgi-bin/carddisp.pl?gene=ETS1">https://www.genecards.org/cgi-bin/carddisp.pl?gene=ETS1</a>       |
| PF4     | Platelet Factor 4                                   | Protein Coding | 47 | GC04M073980 | 2.770424366 | <a href="https://www.genecards.org/cgi-bin/carddisp.pl?gene=PF4">https://www.genecards.org/cgi-bin/carddisp.pl?gene=PF4</a>         |
| ALPI    | Alkaline Phosphatase, Intestinal                    | Protein Coding | 53 | GC02P232456 | 2.770240307 | <a href="https://www.genecards.org/cgi-bin/carddisp.pl?gene=ALPI">https://www.genecards.org/cgi-bin/carddisp.pl?gene=ALPI</a>       |
| PLCB3   | Phospholipase C Beta 3                              | Protein Coding | 56 | GC11P064251 | 2.770110607 | <a href="https://www.genecards.org/cgi-bin/carddisp.pl?gene=PLCB3">https://www.genecards.org/cgi-bin/carddisp.pl?gene=PLCB3</a>     |
| YBX1    | Y-Box Binding Protein 1                             | Protein Coding | 46 | GC01P042682 | 2.769355774 | <a href="https://www.genecards.org/cgi-bin/carddisp.pl?gene=YBX1">https://www.genecards.org/cgi-bin/carddisp.pl?gene=YBX1</a>       |
| PANK3   | Pantothenate Kinase 3                               | Protein Coding | 44 | GC05M168549 | 2.766651154 | <a href="https://www.genecards.org/cgi-bin/carddisp.pl?gene=PANK3">https://www.genecards.org/cgi-bin/carddisp.pl?gene=PANK3</a>     |
| RPL13A  | Ribosomal Protein L13a                              | Protein Coding | 48 | GC19P049487 | 2.766079187 | <a href="https://www.genecards.org/cgi-bin/carddisp.pl?gene=RPL13A">https://www.genecards.org/cgi-bin/carddisp.pl?gene=RPL13A</a>   |



|        |                                                            |                |    |             |             |                                                                                                                                   |
|--------|------------------------------------------------------------|----------------|----|-------------|-------------|-----------------------------------------------------------------------------------------------------------------------------------|
| SUCLG2 | Succinate-CoA Ligase GDP-Forming Subunit Beta              | Protein Coding | 49 | GC03M067358 | 2.763974905 | <a href="https://www.genecards.org/cgi-bin/carddisp.pl?gene=SUCLG2">https://www.genecards.org/cgi-bin/carddisp.pl?gene=SUCLG2</a> |
| FST    | Follistatin                                                | Protein Coding | 55 | GC05P053480 | 2.76219511  | <a href="https://www.genecards.org/cgi-bin/carddisp.pl?gene=FST">https://www.genecards.org/cgi-bin/carddisp.pl?gene=FST</a>       |
| IKBKE  | Inhibitor Of Nuclear Factor Kappa B Kinase Subunit Epsilon | Protein Coding | 52 | GC01P206470 | 2.76121664  | <a href="https://www.genecards.org/cgi-bin/carddisp.pl?gene=IKBKE">https://www.genecards.org/cgi-bin/carddisp.pl?gene=IKBKE</a>   |
| AWAT1  | Acyl-CoA Wax Alcohol Acyltransferase 1                     | Protein Coding | 32 | GC0XP070234 | 2.760582924 | <a href="https://www.genecards.org/cgi-bin/carddisp.pl?gene=AWAT1">https://www.genecards.org/cgi-bin/carddisp.pl?gene=AWAT1</a>   |
| IL2RB  | Interleukin 2 Receptor Subunit Beta                        | Protein Coding | 56 | GC22M061459 | 2.75886631  | <a href="https://www.genecards.org/cgi-bin/carddisp.pl?gene=IL2RB">https://www.genecards.org/cgi-bin/carddisp.pl?gene=IL2RB</a>   |
| IRF3   | Interferon Regulatory Factor 3                             | Protein Coding | 51 | GC19M049659 | 2.755576134 | <a href="https://www.genecards.org/cgi-bin/carddisp.pl?gene=IRF3">https://www.genecards.org/cgi-bin/carddisp.pl?gene=IRF3</a>     |
| EPHA2  | EPH Receptor A2                                            | Protein Coding | 60 | GC01M016124 | 2.755475283 | <a href="https://www.genecards.org/cgi-bin/carddisp.pl?gene=EPHA2">https://www.genecards.org/cgi-bin/carddisp.pl?gene=EPHA2</a>   |
| ADRA2B | Adrenoceptor Alpha 2B                                      | Protein Coding | 51 | GC02M096112 | 2.752860546 | <a href="https://www.genecards.org/cgi-bin/carddisp.pl?gene=ADRA2B">https://www.genecards.org/cgi-bin/carddisp.pl?gene=ADRA2B</a> |
| PRLHR  | Prolactin Releasing Hormone Receptor                       | Protein Coding | 46 | GC10M118590 | 2.752020121 | <a href="https://www.genecards.org/cgi-bin/carddisp.pl?gene=PRLHR">https://www.genecards.org/cgi-bin/carddisp.pl?gene=PRLHR</a>   |
| FOSL1  | FOS Like 1, AP-1 Transcription Factor Subunit              | Protein Coding | 51 | GC11M099737 | 2.751973152 | <a href="https://www.genecards.org/cgi-bin/carddisp.pl?gene=FOSL1">https://www.genecards.org/cgi-bin/carddisp.pl?gene=FOSL1</a>   |
| SENP2  | SUMO Specific Peptidase 2                                  | Protein Coding | 47 | GC03P185582 | 2.750661612 | <a href="https://www.genecards.org/cgi-bin/carddisp.pl?gene=SENP2">https://www.genecards.org/cgi-bin/carddisp.pl?gene=SENP2</a>   |
| TPM3   | Tropomyosin 3                                              | Protein Coding | 53 | GC01M154127 | 2.744642019 | <a href="https://www.genecards.org/cgi-bin/carddisp.pl?gene=TPM3">https://www.genecards.org/cgi-bin/carddisp.pl?gene=TPM3</a>     |
| LCK    | LCK Proto-Oncogene, Src Family Tyrosine Kinase             | Protein Coding | 59 | GC01P032251 | 2.742602825 | <a href="https://www.genecards.org/cgi-bin/carddisp.pl?gene=LCK">https://www.genecards.org/cgi-bin/carddisp.pl?gene=LCK</a>       |
| FAR2   | Fatty Acyl-CoA Reductase 2                                 | Protein Coding | 45 | GC12P029145 | 2.741351843 | <a href="https://www.genecards.org/cgi-bin/carddisp.pl?gene=FAR2">https://www.genecards.org/cgi-bin/carddisp.pl?gene=FAR2</a>     |
| PTAFR  | Platelet Activating Factor Receptor                        | Protein Coding | 48 | GC01M028147 | 2.740926266 | <a href="https://www.genecards.org/cgi-bin/carddisp.pl?gene=PTAFR">https://www.genecards.org/cgi-bin/carddisp.pl?gene=PTAFR</a>   |

|         |                                               |                |    |             |             |                                                                                                                                     |
|---------|-----------------------------------------------|----------------|----|-------------|-------------|-------------------------------------------------------------------------------------------------------------------------------------|
| POLB    | DNA Polymerase Beta                           | Protein Coding | 51 | GC08P042338 | 2.739527225 | <a href="https://www.genecards.org/cgi-bin/carddisp.pl?gene=POLB">https://www.genecards.org/cgi-bin/carddisp.pl?gene=POLB</a>       |
| IL4R    | Interleukin 4 Receptor                        | Protein Coding | 55 | GC16P042490 | 2.739160299 | <a href="https://www.genecards.org/cgi-bin/carddisp.pl?gene=IL4R">https://www.genecards.org/cgi-bin/carddisp.pl?gene=IL4R</a>       |
| HSD17B6 | Hydroxysteroid 17-Beta Dehydrogenase 6        | Protein Coding | 48 | GC12P056752 | 2.739024639 | <a href="https://www.genecards.org/cgi-bin/carddisp.pl?gene=HSD17B6">https://www.genecards.org/cgi-bin/carddisp.pl?gene=HSD17B6</a> |
| KHSRP   | KH-Type Splicing Regulatory Protein           | Protein Coding | 48 | GC19M006413 | 2.736800432 | <a href="https://www.genecards.org/cgi-bin/carddisp.pl?gene=KHSRP">https://www.genecards.org/cgi-bin/carddisp.pl?gene=KHSRP</a>     |
| PTPRN2  | Protein Tyrosine Phosphatase Receptor Type N2 | Protein Coding | 52 | GC07M157539 | 2.735739231 | <a href="https://www.genecards.org/cgi-bin/carddisp.pl?gene=PTPRN2">https://www.genecards.org/cgi-bin/carddisp.pl?gene=PTPRN2</a>   |
| NCL     | Nucleolin                                     | Protein Coding | 51 | GC02M231453 | 2.735020161 | <a href="https://www.genecards.org/cgi-bin/carddisp.pl?gene=NCL">https://www.genecards.org/cgi-bin/carddisp.pl?gene=NCL</a>         |
| CD47    | CD47 Molecule                                 | Protein Coding | 51 | GC03M108043 | 2.731025934 | <a href="https://www.genecards.org/cgi-bin/carddisp.pl?gene=CD47">https://www.genecards.org/cgi-bin/carddisp.pl?gene=CD47</a>       |
| CTSL    | Cathepsin L                                   | Protein Coding | 53 | GC09P087725 | 2.730602264 | <a href="https://www.genecards.org/cgi-bin/carddisp.pl?gene=CTSL">https://www.genecards.org/cgi-bin/carddisp.pl?gene=CTSL</a>       |
| RACK1   | Receptor For Activated C Kinase 1             | Protein Coding | 50 | GC05M181933 | 2.726868153 | <a href="https://www.genecards.org/cgi-bin/carddisp.pl?gene=RACK1">https://www.genecards.org/cgi-bin/carddisp.pl?gene=RACK1</a>     |
| APLNR   | Apelin Receptor                               | Protein Coding | 51 | GC11M057233 | 2.725875854 | <a href="https://www.genecards.org/cgi-bin/carddisp.pl?gene=APLNR">https://www.genecards.org/cgi-bin/carddisp.pl?gene=APLNR</a>     |
| PIAS1   | Protein Inhibitor Of Activated STAT 1         | Protein Coding | 51 | GC15P068054 | 2.72550869  | <a href="https://www.genecards.org/cgi-bin/carddisp.pl?gene=PIAS1">https://www.genecards.org/cgi-bin/carddisp.pl?gene=PIAS1</a>     |
| ARF1    | ADP Ribosylation Factor 1                     | Protein Coding | 51 | GC01P228082 | 2.724269629 | <a href="https://www.genecards.org/cgi-bin/carddisp.pl?gene=ARF1">https://www.genecards.org/cgi-bin/carddisp.pl?gene=ARF1</a>       |
| MOGAT1  | Monoacylglycerol O-Acyltransferase 1          | Protein Coding | 41 | GC02P222671 | 2.721960545 | <a href="https://www.genecards.org/cgi-bin/carddisp.pl?gene=MOGAT1">https://www.genecards.org/cgi-bin/carddisp.pl?gene=MOGAT1</a>   |
| BMP7    | Bone Morphogenetic Protein 7                  | Protein Coding | 52 | GC20M057168 | 2.72125721  | <a href="https://www.genecards.org/cgi-bin/carddisp.pl?gene=BMP7">https://www.genecards.org/cgi-bin/carddisp.pl?gene=BMP7</a>       |
| CCNB1   | Cyclin B1                                     | Protein Coding | 53 | GC05P069167 | 2.720210075 | <a href="https://www.genecards.org/cgi-bin/carddisp.pl?gene=CCNB1">https://www.genecards.org/cgi-bin/carddisp.pl?gene=CCNB1</a>     |

|        |                                                            |                |    |             |             |                                                                                                                                   |
|--------|------------------------------------------------------------|----------------|----|-------------|-------------|-----------------------------------------------------------------------------------------------------------------------------------|
| TYK2   | Tyrosine Kinase 2                                          | Protein Coding | 60 | GC19M010350 | 2.719821692 | <a href="https://www.genecards.org/cgi-bin/carddisp.pl?gene=TYK2">https://www.genecards.org/cgi-bin/carddisp.pl?gene=TYK2</a>     |
| CFLAR  | CASP8 And FADD Like Apoptosis Regulator                    | Protein Coding | 51 | GC02P201122 | 2.718475819 | <a href="https://www.genecards.org/cgi-bin/carddisp.pl?gene=CFLAR">https://www.genecards.org/cgi-bin/carddisp.pl?gene=CFLAR</a>   |
| RECK   | Reversion Inducing Cysteine Rich Protein With Kazal Motifs | Protein Coding | 47 | GC09P036036 | 2.718043327 | <a href="https://www.genecards.org/cgi-bin/carddisp.pl?gene=RECK">https://www.genecards.org/cgi-bin/carddisp.pl?gene=RECK</a>     |
| MUC5AC | Mucin 5AC, Oligomeric Mucus/Gel-Forming                    | Protein Coding | 46 | GC11P002129 | 2.716766119 | <a href="https://www.genecards.org/cgi-bin/carddisp.pl?gene=MUC5AC">https://www.genecards.org/cgi-bin/carddisp.pl?gene=MUC5AC</a> |
| CAMKK2 | Calcium/Calmodulin Dependent Protein Kinase Kinase 2       | Protein Coding | 54 | GC12M122474 | 2.714353085 | <a href="https://www.genecards.org/cgi-bin/carddisp.pl?gene=CAMKK2">https://www.genecards.org/cgi-bin/carddisp.pl?gene=CAMKK2</a> |
| LMOD1  | Leiomodin 1                                                | Protein Coding | 47 | GC01M201896 | 2.712001324 | <a href="https://www.genecards.org/cgi-bin/carddisp.pl?gene=LMOD1">https://www.genecards.org/cgi-bin/carddisp.pl?gene=LMOD1</a>   |
| CD81   | CD81 Molecule                                              | Protein Coding | 53 | GC11P002563 | 2.708006859 | <a href="https://www.genecards.org/cgi-bin/carddisp.pl?gene=CD81">https://www.genecards.org/cgi-bin/carddisp.pl?gene=CD81</a>     |
| SYP    | Synaptophysin                                              | Protein Coding | 52 | GC0XM049187 | 2.701478481 | <a href="https://www.genecards.org/cgi-bin/carddisp.pl?gene=SYP">https://www.genecards.org/cgi-bin/carddisp.pl?gene=SYP</a>       |
| FCGR2A | Fc Gamma Receptor IIa                                      | Protein Coding | 55 | GC01P161505 | 2.700136185 | <a href="https://www.genecards.org/cgi-bin/carddisp.pl?gene=FCGR2A">https://www.genecards.org/cgi-bin/carddisp.pl?gene=FCGR2A</a> |
| FMOD   | Fibromodulin                                               | Protein Coding | 48 | GC01M203340 | 2.698026896 | <a href="https://www.genecards.org/cgi-bin/carddisp.pl?gene=FMOD">https://www.genecards.org/cgi-bin/carddisp.pl?gene=FMOD</a>     |
| MBOAT1 | Membrane Bound O-Acyltransferase Domain Containing 1       | Protein Coding | 42 | GC06M020102 | 2.697533131 | <a href="https://www.genecards.org/cgi-bin/carddisp.pl?gene=MBOAT1">https://www.genecards.org/cgi-bin/carddisp.pl?gene=MBOAT1</a> |
| PAK2   | P21 (RAC1) Activated Kinase 2                              | Protein Coding | 55 | GC03P196739 | 2.692825556 | <a href="https://www.genecards.org/cgi-bin/carddisp.pl?gene=PAK2">https://www.genecards.org/cgi-bin/carddisp.pl?gene=PAK2</a>     |
| KRT19  | Keratin 19                                                 | Protein Coding | 50 | GC17M041523 | 2.688460112 | <a href="https://www.genecards.org/cgi-bin/carddisp.pl?gene=KRT19">https://www.genecards.org/cgi-bin/carddisp.pl?gene=KRT19</a>   |
| SH2B3  | SH2B Adaptor Protein 3                                     | Protein Coding | 54 | GC12P111405 | 2.684833288 | <a href="https://www.genecards.org/cgi-bin/carddisp.pl?gene=SH2B3">https://www.genecards.org/cgi-bin/carddisp.pl?gene=SH2B3</a>   |
| PCBP1  | Poly(RC) Binding Protein 1                                 | Protein Coding | 48 | GC02P070087 | 2.683332443 | <a href="https://www.genecards.org/cgi-bin/carddisp.pl?gene=PCBP1">https://www.genecards.org/cgi-bin/carddisp.pl?gene=PCBP1</a>   |

|        |                                                |                |    |             |             |                                                                                                                                   |
|--------|------------------------------------------------|----------------|----|-------------|-------------|-----------------------------------------------------------------------------------------------------------------------------------|
| LEF1   | Lymphoid Enhancer Binding Factor 1             | Protein Coding | 55 | GC04M108047 | 2.683016062 | <a href="https://www.genecards.org/cgi-bin/carddisp.pl?gene=LEF1">https://www.genecards.org/cgi-bin/carddisp.pl?gene=LEF1</a>     |
| CDX2   | Caudal Type Homeobox 2                         | Protein Coding | 48 | GC13M027962 | 2.681468248 | <a href="https://www.genecards.org/cgi-bin/carddisp.pl?gene=CDX2">https://www.genecards.org/cgi-bin/carddisp.pl?gene=CDX2</a>     |
| ACTC1  | Actin Alpha Cardiac Muscle 1                   | Protein Coding | 51 | GC15M034790 | 2.680232525 | <a href="https://www.genecards.org/cgi-bin/carddisp.pl?gene=ACTC1">https://www.genecards.org/cgi-bin/carddisp.pl?gene=ACTC1</a>   |
| LPAR1  | Lysophosphatidic Acid Receptor 1               | Protein Coding | 53 | GC09M110873 | 2.678920269 | <a href="https://www.genecards.org/cgi-bin/carddisp.pl?gene=LPAR1">https://www.genecards.org/cgi-bin/carddisp.pl?gene=LPAR1</a>   |
| KRT7   | Keratin 7                                      | Protein Coding | 48 | GC12P052232 | 2.6780653   | <a href="https://www.genecards.org/cgi-bin/carddisp.pl?gene=KRT7">https://www.genecards.org/cgi-bin/carddisp.pl?gene=KRT7</a>     |
| HAS3   | Hyaluronan Synthase 3                          | Protein Coding | 48 | GC16P069105 | 2.677442789 | <a href="https://www.genecards.org/cgi-bin/carddisp.pl?gene=HAS3">https://www.genecards.org/cgi-bin/carddisp.pl?gene=HAS3</a>     |
| FYN    | FYN Proto-Oncogene, Src Family Tyrosine Kinase | Protein Coding | 53 | GC06M111660 | 2.676315069 | <a href="https://www.genecards.org/cgi-bin/carddisp.pl?gene=FYN">https://www.genecards.org/cgi-bin/carddisp.pl?gene=FYN</a>       |
| MAP2K7 | Mitogen-Activated Protein Kinase Kinase 7      | Protein Coding | 52 | GC19P007903 | 2.675574064 | <a href="https://www.genecards.org/cgi-bin/carddisp.pl?gene=MAP2K7">https://www.genecards.org/cgi-bin/carddisp.pl?gene=MAP2K7</a> |
| HSPA9  | Heat Shock Protein Family A (Hsp70) Member 9   | Protein Coding | 54 | GC05M138554 | 2.675514698 | <a href="https://www.genecards.org/cgi-bin/carddisp.pl?gene=HSPA9">https://www.genecards.org/cgi-bin/carddisp.pl?gene=HSPA9</a>   |
| TFG    | Trafficking From ER To Golgi Regulator         | Protein Coding | 51 | GC03P100709 | 2.672077417 | <a href="https://www.genecards.org/cgi-bin/carddisp.pl?gene=TFG">https://www.genecards.org/cgi-bin/carddisp.pl?gene=TFG</a>       |
| COL3A1 | Collagen Type III Alpha 1 Chain                | Protein Coding | 54 | GC02P188974 | 2.669884205 | <a href="https://www.genecards.org/cgi-bin/carddisp.pl?gene=COL3A1">https://www.genecards.org/cgi-bin/carddisp.pl?gene=COL3A1</a> |
| MST1   | Macrophage Stimulating 1                       | Protein Coding | 53 | GC03M049683 | 2.668335438 | <a href="https://www.genecards.org/cgi-bin/carddisp.pl?gene=MST1">https://www.genecards.org/cgi-bin/carddisp.pl?gene=MST1</a>     |
| TBP    | TATA-Box Binding Protein                       | Protein Coding | 55 | GC06P170554 | 2.667933941 | <a href="https://www.genecards.org/cgi-bin/carddisp.pl?gene=TBP">https://www.genecards.org/cgi-bin/carddisp.pl?gene=TBP</a>       |
| RYR3   | Ryanodine Receptor 3                           | Protein Coding | 48 | GC15P033310 | 2.665052652 | <a href="https://www.genecards.org/cgi-bin/carddisp.pl?gene=RYR3">https://www.genecards.org/cgi-bin/carddisp.pl?gene=RYR3</a>     |
| GJA1   | Gap Junction Protein Alpha 1                   | Protein Coding | 57 | GC06P121436 | 2.663125038 | <a href="https://www.genecards.org/cgi-bin/carddisp.pl?gene=GJA1">https://www.genecards.org/cgi-bin/carddisp.pl?gene=GJA1</a>     |

|         |                                                            |                |    |             |             |                                                                                                                                     |
|---------|------------------------------------------------------------|----------------|----|-------------|-------------|-------------------------------------------------------------------------------------------------------------------------------------|
| ANK1    | Ankyrin 1                                                  | Protein Coding | 50 | GC08M041653 | 2.662607908 | <a href="https://www.genecards.org/cgi-bin/carddisp.pl?gene=ANK1">https://www.genecards.org/cgi-bin/carddisp.pl?gene=ANK1</a>       |
| SYT1    | Synaptotagmin 1                                            | Protein Coding | 55 | GC12P078863 | 2.662100077 | <a href="https://www.genecards.org/cgi-bin/carddisp.pl?gene=SYT1">https://www.genecards.org/cgi-bin/carddisp.pl?gene=SYT1</a>       |
| BLK     | BLK Proto-Oncogene, Src Family Tyrosine Kinase             | Protein Coding | 56 | GC08P011486 | 2.66164875  | <a href="https://www.genecards.org/cgi-bin/carddisp.pl?gene=BLK">https://www.genecards.org/cgi-bin/carddisp.pl?gene=BLK</a>         |
| SMAD7   | SMAD Family Member 7                                       | Protein Coding | 51 | GC18M048919 | 2.660331011 | <a href="https://www.genecards.org/cgi-bin/carddisp.pl?gene=SMAD7">https://www.genecards.org/cgi-bin/carddisp.pl?gene=SMAD7</a>     |
| LBP     | Lipopolysaccharide Binding Protein                         | Protein Coding | 51 | GC20P038346 | 2.656612635 | <a href="https://www.genecards.org/cgi-bin/carddisp.pl?gene=LBP">https://www.genecards.org/cgi-bin/carddisp.pl?gene=LBP</a>         |
| ZAP70   | Zeta Chain Of T Cell Receptor Associated Protein Kinase 70 | Protein Coding | 59 | GC02P097773 | 2.655203342 | <a href="https://www.genecards.org/cgi-bin/carddisp.pl?gene=ZAP70">https://www.genecards.org/cgi-bin/carddisp.pl?gene=ZAP70</a>     |
| JUP     | Junction Plakoglobin                                       | Protein Coding | 55 | GC17M041754 | 2.653947115 | <a href="https://www.genecards.org/cgi-bin/carddisp.pl?gene=JUP">https://www.genecards.org/cgi-bin/carddisp.pl?gene=JUP</a>         |
| UBE2K   | Ubiquitin Conjugating Enzyme E2 K                          | Protein Coding | 48 | GC04P039700 | 2.653835773 | <a href="https://www.genecards.org/cgi-bin/carddisp.pl?gene=UBE2K">https://www.genecards.org/cgi-bin/carddisp.pl?gene=UBE2K</a>     |
| FMR1    | Fragile X Messenger Ribonucleoprotein 1                    | Protein Coding | 51 | GC0XP147956 | 2.65137434  | <a href="https://www.genecards.org/cgi-bin/carddisp.pl?gene=FMR1">https://www.genecards.org/cgi-bin/carddisp.pl?gene=FMR1</a>       |
| MAP2K4  | Mitogen-Activated Protein Kinase Kinase 4                  | Protein Coding | 53 | GC17P012020 | 2.649491787 | <a href="https://www.genecards.org/cgi-bin/carddisp.pl?gene=MAP2K4">https://www.genecards.org/cgi-bin/carddisp.pl?gene=MAP2K4</a>   |
| GPR42   | G Protein-Coupled Receptor 42                              | Protein Coding | 30 | GC19P073881 | 2.649134159 | <a href="https://www.genecards.org/cgi-bin/carddisp.pl?gene=GPR42">https://www.genecards.org/cgi-bin/carddisp.pl?gene=GPR42</a>     |
| ST6GAL1 | ST6 Beta-Galactoside Alpha-2,6-Sialyltransferase 1         | Protein Coding | 51 | GC03P186930 | 2.644136429 | <a href="https://www.genecards.org/cgi-bin/carddisp.pl?gene=ST6GAL1">https://www.genecards.org/cgi-bin/carddisp.pl?gene=ST6GAL1</a> |
| NPHS1   | NPHS1 Adhesion Molecule, Nephrin                           | Protein Coding | 53 | GC19M035825 | 2.644048214 | <a href="https://www.genecards.org/cgi-bin/carddisp.pl?gene=NPHS1">https://www.genecards.org/cgi-bin/carddisp.pl?gene=NPHS1</a>     |
| XPO1    | Exportin 1                                                 | Protein Coding | 55 | GC02M061445 | 2.641967058 | <a href="https://www.genecards.org/cgi-bin/carddisp.pl?gene=XPO1">https://www.genecards.org/cgi-bin/carddisp.pl?gene=XPO1</a>       |
| TFF3    | Trefoil Factor 3                                           | Protein Coding | 47 | GC21M042311 | 2.641746759 | <a href="https://www.genecards.org/cgi-bin/carddisp.pl?gene=TFF3">https://www.genecards.org/cgi-bin/carddisp.pl?gene=TFF3</a>       |

|          |                                                        |                |    |             |             |                                                                                                                                       |
|----------|--------------------------------------------------------|----------------|----|-------------|-------------|---------------------------------------------------------------------------------------------------------------------------------------|
| TMPO     | Thymopoietin                                           | Protein Coding | 53 | GC12P098515 | 2.639974356 | <a href="https://www.genecards.org/cgi-bin/carddisp.pl?gene=TMPO">https://www.genecards.org/cgi-bin/carddisp.pl?gene=TMPO</a>         |
| GNAI1    | G Protein Subunit Alpha I1                             | Protein Coding | 53 | GC07P079769 | 2.639129162 | <a href="https://www.genecards.org/cgi-bin/carddisp.pl?gene=GNAI1">https://www.genecards.org/cgi-bin/carddisp.pl?gene=GNAI1</a>       |
| REST     | RE1 Silencing Transcription Factor                     | Protein Coding | 49 | GC04P056907 | 2.639044046 | <a href="https://www.genecards.org/cgi-bin/carddisp.pl?gene=REST">https://www.genecards.org/cgi-bin/carddisp.pl?gene=REST</a>         |
| PPP1R1B  | Protein Phosphatase 1 Regulatory Inhibitor Subunit 1B  | Protein Coding | 49 | GC17P039626 | 2.632069588 | <a href="https://www.genecards.org/cgi-bin/carddisp.pl?gene=PPP1R1B">https://www.genecards.org/cgi-bin/carddisp.pl?gene=PPP1R1B</a>   |
| IL12RB1  | Interleukin 12 Receptor Subunit Beta 1                 | Protein Coding | 52 | GC19M018058 | 2.624730587 | <a href="https://www.genecards.org/cgi-bin/carddisp.pl?gene=IL12RB1">https://www.genecards.org/cgi-bin/carddisp.pl?gene=IL12RB1</a>   |
| GHRHR    | Growth Hormone Releasing Hormone Receptor              | Protein Coding | 49 | GC07P030938 | 2.624176502 | <a href="https://www.genecards.org/cgi-bin/carddisp.pl?gene=GHRHR">https://www.genecards.org/cgi-bin/carddisp.pl?gene=GHRHR</a>       |
| EPHB4    | EPH Receptor B4                                        | Protein Coding | 60 | GC07M102433 | 2.621126175 | <a href="https://www.genecards.org/cgi-bin/carddisp.pl?gene=EPHB4">https://www.genecards.org/cgi-bin/carddisp.pl?gene=EPHB4</a>       |
| ADRA2C   | Adrenoceptor Alpha 2C                                  | Protein Coding | 52 | GC04P003766 | 2.617765427 | <a href="https://www.genecards.org/cgi-bin/carddisp.pl?gene=ADRA2C">https://www.genecards.org/cgi-bin/carddisp.pl?gene=ADRA2C</a>     |
| GLYATL1  | Glycine-N-Acyltransferase Like 1                       | Protein Coding | 40 | GC11P058906 | 2.615096807 | <a href="https://www.genecards.org/cgi-bin/carddisp.pl?gene=GLYATL1">https://www.genecards.org/cgi-bin/carddisp.pl?gene=GLYATL1</a>   |
| MICA     | MHC Class I Polypeptide-Related Sequence A             | Protein Coding | 46 | GC06P031399 | 2.612233639 | <a href="https://www.genecards.org/cgi-bin/carddisp.pl?gene=MICA">https://www.genecards.org/cgi-bin/carddisp.pl?gene=MICA</a>         |
| TP53BP1  | Tumor Protein P53 Binding Protein 1                    | Protein Coding | 50 | GC15M043403 | 2.604650736 | <a href="https://www.genecards.org/cgi-bin/carddisp.pl?gene=TP53BP1">https://www.genecards.org/cgi-bin/carddisp.pl?gene=TP53BP1</a>   |
| AGPAT4   | 1-Acylglycerol-3-Phosphate O-Acyltransferase 4         | Protein Coding | 47 | GC06M161129 | 2.601899624 | <a href="https://www.genecards.org/cgi-bin/carddisp.pl?gene=AGPAT4">https://www.genecards.org/cgi-bin/carddisp.pl?gene=AGPAT4</a>     |
| ROCK1    | Rho Associated Coiled-Coil Containing Protein Kinase 1 | Protein Coding | 56 | GC18M020946 | 2.60150075  | <a href="https://www.genecards.org/cgi-bin/carddisp.pl?gene=ROCK1">https://www.genecards.org/cgi-bin/carddisp.pl?gene=ROCK1</a>       |
| NRP1     | Neuropilin 1                                           | Protein Coding | 54 | GC10M033177 | 2.599191189 | <a href="https://www.genecards.org/cgi-bin/carddisp.pl?gene=NRP1">https://www.genecards.org/cgi-bin/carddisp.pl?gene=NRP1</a>         |
| MAPKAPK2 | MAPK Activated Protein Kinase 2                        | Protein Coding | 54 | GC01P206684 | 2.598197699 | <a href="https://www.genecards.org/cgi-bin/carddisp.pl?gene=MAPKAPK2">https://www.genecards.org/cgi-bin/carddisp.pl?gene=MAPKAPK2</a> |

|         |                                                             |                |    |             |             |                                                                                                                                     |
|---------|-------------------------------------------------------------|----------------|----|-------------|-------------|-------------------------------------------------------------------------------------------------------------------------------------|
| CCKBR   | Cholecystokinin B Receptor                                  | Protein Coding | 51 | GC11P006259 | 2.589323282 | <a href="https://www.genecards.org/cgi-bin/carddisp.pl?gene=CCKBR">https://www.genecards.org/cgi-bin/carddisp.pl?gene=CCKBR</a>     |
| TXK     | TXK Tyrosine Kinase                                         | Protein Coding | 51 | GC04M048066 | 2.589127541 | <a href="https://www.genecards.org/cgi-bin/carddisp.pl?gene=TXK">https://www.genecards.org/cgi-bin/carddisp.pl?gene=TXK</a>         |
| THEM4   | Thioesterase Superfamily Member 4                           | Protein Coding | 47 | GC01M151870 | 2.588637114 | <a href="https://www.genecards.org/cgi-bin/carddisp.pl?gene=THEM4">https://www.genecards.org/cgi-bin/carddisp.pl?gene=THEM4</a>     |
| TLR9    | Toll Like Receptor 9                                        | Protein Coding | 53 | GC03M052222 | 2.587840796 | <a href="https://www.genecards.org/cgi-bin/carddisp.pl?gene=TLR9">https://www.genecards.org/cgi-bin/carddisp.pl?gene=TLR9</a>       |
| PRKCQ   | Protein Kinase C Theta                                      | Protein Coding | 55 | GC10M006591 | 2.587505102 | <a href="https://www.genecards.org/cgi-bin/carddisp.pl?gene=PRKCQ">https://www.genecards.org/cgi-bin/carddisp.pl?gene=PRKCQ</a>     |
| PTPRN   | Protein Tyrosine Phosphatase Receptor Type N                | Protein Coding | 51 | GC02M219289 | 2.586440563 | <a href="https://www.genecards.org/cgi-bin/carddisp.pl?gene=PTPRN">https://www.genecards.org/cgi-bin/carddisp.pl?gene=PTPRN</a>     |
| LHCGR   | Luteinizing Hormone/Choriogonadotropin Receptor             | Protein Coding | 53 | GC02M048686 | 2.585967064 | <a href="https://www.genecards.org/cgi-bin/carddisp.pl?gene=LHCGR">https://www.genecards.org/cgi-bin/carddisp.pl?gene=LHCGR</a>     |
| OSM     | Oncostatin M                                                | Protein Coding | 50 | GC22M030262 | 2.585475683 | <a href="https://www.genecards.org/cgi-bin/carddisp.pl?gene=OSM">https://www.genecards.org/cgi-bin/carddisp.pl?gene=OSM</a>         |
| PITPNM1 | Phosphatidylinositol Transfer Protein Membrane Associated 1 | Protein Coding | 46 | GC11M099817 | 2.578641653 | <a href="https://www.genecards.org/cgi-bin/carddisp.pl?gene=PITPNM1">https://www.genecards.org/cgi-bin/carddisp.pl?gene=PITPNM1</a> |
| BBOX1   | Gamma-Butyrobetaine Hydroxylase 1                           | Protein Coding | 46 | GC11P027019 | 2.571772099 | <a href="https://www.genecards.org/cgi-bin/carddisp.pl?gene=BBOX1">https://www.genecards.org/cgi-bin/carddisp.pl?gene=BBOX1</a>     |
| USP8    | Ubiquitin Specific Peptidase 8                              | Protein Coding | 53 | GC15P050424 | 2.568456888 | <a href="https://www.genecards.org/cgi-bin/carddisp.pl?gene=USP8">https://www.genecards.org/cgi-bin/carddisp.pl?gene=USP8</a>       |
| MYB     | MYB Proto-Oncogene, Transcription Factor                    | Protein Coding | 55 | GC06P135180 | 2.568442822 | <a href="https://www.genecards.org/cgi-bin/carddisp.pl?gene=MYB">https://www.genecards.org/cgi-bin/carddisp.pl?gene=MYB</a>         |
| PRF1    | Perforin 1                                                  | Protein Coding | 53 | GC10M070597 | 2.566235065 | <a href="https://www.genecards.org/cgi-bin/carddisp.pl?gene=PRF1">https://www.genecards.org/cgi-bin/carddisp.pl?gene=PRF1</a>       |
| KIF5B   | Kinesin Family Member 5B                                    | Protein Coding | 51 | GC10M033629 | 2.563094139 | <a href="https://www.genecards.org/cgi-bin/carddisp.pl?gene=KIF5B">https://www.genecards.org/cgi-bin/carddisp.pl?gene=KIF5B</a>     |
| SLC9A2  | Solute Carrier Family 9 Member A2                           | Protein Coding | 48 | GC02P102620 | 2.559026003 | <a href="https://www.genecards.org/cgi-bin/carddisp.pl?gene=SLC9A2">https://www.genecards.org/cgi-bin/carddisp.pl?gene=SLC9A2</a>   |

|          |                                                 |                |    |             |             |                                                                                                                                       |
|----------|-------------------------------------------------|----------------|----|-------------|-------------|---------------------------------------------------------------------------------------------------------------------------------------|
| CXCR3    | C-X-C Motif Chemokine Receptor 3                | Protein Coding | 51 | GC0XM071615 | 2.55614996  | <a href="https://www.genecards.org/cgi-bin/carddisp.pl?gene=CXCR3">https://www.genecards.org/cgi-bin/carddisp.pl?gene=CXCR3</a>       |
| RPL15    | Ribosomal Protein L15                           | Protein Coding | 50 | GC03P023916 | 2.555617809 | <a href="https://www.genecards.org/cgi-bin/carddisp.pl?gene=RPL15">https://www.genecards.org/cgi-bin/carddisp.pl?gene=RPL15</a>       |
| DDX20    | DEAD-Box Helicase 20                            | Protein Coding | 49 | GC01P111755 | 2.543823242 | <a href="https://www.genecards.org/cgi-bin/carddisp.pl?gene=DDX20">https://www.genecards.org/cgi-bin/carddisp.pl?gene=DDX20</a>       |
| HSF1     | Heat Shock Transcription Factor 1               | Protein Coding | 53 | GC08P144291 | 2.543515205 | <a href="https://www.genecards.org/cgi-bin/carddisp.pl?gene=HSF1">https://www.genecards.org/cgi-bin/carddisp.pl?gene=HSF1</a>         |
| TRAPPC10 | Trafficking Protein Particle Complex Subunit 10 | Protein Coding | 45 | GC21P044012 | 2.542541742 | <a href="https://www.genecards.org/cgi-bin/carddisp.pl?gene=TRAPPC10">https://www.genecards.org/cgi-bin/carddisp.pl?gene=TRAPPC10</a> |
| TYRP1    | Tyrosinase Related Protein 1                    | Protein Coding | 54 | GC09P012683 | 2.541297197 | <a href="https://www.genecards.org/cgi-bin/carddisp.pl?gene=TYRP1">https://www.genecards.org/cgi-bin/carddisp.pl?gene=TYRP1</a>       |
| LGMN     | Legumain                                        | Protein Coding | 49 | GC14M092703 | 2.540930271 | <a href="https://www.genecards.org/cgi-bin/carddisp.pl?gene=LGMN">https://www.genecards.org/cgi-bin/carddisp.pl?gene=LGMN</a>         |
| IVL      | Involucrin                                      | Protein Coding | 45 | GC01P153037 | 2.537791967 | <a href="https://www.genecards.org/cgi-bin/carddisp.pl?gene=IVL">https://www.genecards.org/cgi-bin/carddisp.pl?gene=IVL</a>           |
| NEB      | Nebulin                                         | Protein Coding | 47 | GC02M151485 | 2.537733078 | <a href="https://www.genecards.org/cgi-bin/carddisp.pl?gene=NEB">https://www.genecards.org/cgi-bin/carddisp.pl?gene=NEB</a>           |
| SAFB     | Scaffold Attachment Factor B                    | Protein Coding | 46 | GC19P005623 | 2.537121773 | <a href="https://www.genecards.org/cgi-bin/carddisp.pl?gene=SAFB">https://www.genecards.org/cgi-bin/carddisp.pl?gene=SAFB</a>         |
| FGF7     | Fibroblast Growth Factor 7                      | Protein Coding | 50 | GC15P049423 | 2.536988258 | <a href="https://www.genecards.org/cgi-bin/carddisp.pl?gene=FGF7">https://www.genecards.org/cgi-bin/carddisp.pl?gene=FGF7</a>         |
| SLC7A1   | Solute Carrier Family 7 Member 1                | Protein Coding | 49 | GC13M029509 | 2.536151409 | <a href="https://www.genecards.org/cgi-bin/carddisp.pl?gene=SLC7A1">https://www.genecards.org/cgi-bin/carddisp.pl?gene=SLC7A1</a>     |
| NR2F2    | Nuclear Receptor Subfamily 2 Group F Member 2   | Protein Coding | 56 | GC15P096325 | 2.534425974 | <a href="https://www.genecards.org/cgi-bin/carddisp.pl?gene=NR2F2">https://www.genecards.org/cgi-bin/carddisp.pl?gene=NR2F2</a>       |
| TFPI     | Tissue Factor Pathway Inhibitor                 | Protein Coding | 53 | GC02M187464 | 2.532000542 | <a href="https://www.genecards.org/cgi-bin/carddisp.pl?gene=TFPI">https://www.genecards.org/cgi-bin/carddisp.pl?gene=TFPI</a>         |
| AREG     | Amphiregulin                                    | Protein Coding | 50 | GC04P074445 | 2.528548479 | <a href="https://www.genecards.org/cgi-bin/carddisp.pl?gene=AREG">https://www.genecards.org/cgi-bin/carddisp.pl?gene=AREG</a>         |



|   |         |                                                                         |                |    |             |             |                                                                                                                                     |
|---|---------|-------------------------------------------------------------------------|----------------|----|-------------|-------------|-------------------------------------------------------------------------------------------------------------------------------------|
|   | CTSC    | Cathepsin C                                                             | Protein Coding | 54 | GC11M100229 | 2.527719021 | <a href="https://www.genecards.org/cgi-bin/carddisp.pl?gene=CTSC">https://www.genecards.org/cgi-bin/carddisp.pl?gene=CTSC</a>       |
|   | CCR3    | C-C Motif Chemokine Receptor 3                                          | Protein Coding | 52 | GC03P047610 | 2.519971371 | <a href="https://www.genecards.org/cgi-bin/carddisp.pl?gene=CCR3">https://www.genecards.org/cgi-bin/carddisp.pl?gene=CCR3</a>       |
|   | ECE1    | Endothelin Converting Enzyme 1                                          | Protein Coding | 55 | GC01M021217 | 2.518996477 | <a href="https://www.genecards.org/cgi-bin/carddisp.pl?gene=ECE1">https://www.genecards.org/cgi-bin/carddisp.pl?gene=ECE1</a>       |
|   | CRKL    | CRK Like Proto-Oncogene, Adaptor Protein                                | Protein Coding | 53 | GC22P020917 | 2.518113375 | <a href="https://www.genecards.org/cgi-bin/carddisp.pl?gene=CRKL">https://www.genecards.org/cgi-bin/carddisp.pl?gene=CRKL</a>       |
|   | CRHR1   | Corticotropin Releasing Hormone Receptor 1                              | Protein Coding | 51 | GC17P045784 | 2.517398357 | <a href="https://www.genecards.org/cgi-bin/carddisp.pl?gene=CRHR1">https://www.genecards.org/cgi-bin/carddisp.pl?gene=CRHR1</a>     |
| T | AASDHPP | Aminoadipate-Semialdehyde Dehydrogenase-Phosphopantetheinyl Transferase | Protein Coding | 44 | GC11P106075 | 2.514085293 | <a href="https://www.genecards.org/cgi-bin/carddisp.pl?gene=AASDHPP">https://www.genecards.org/cgi-bin/carddisp.pl?gene=AASDHPP</a> |
|   | FCGR3B  | Fc Gamma Receptor IIIb                                                  | Protein Coding | 50 | GC01M161623 | 2.514079332 | <a href="https://www.genecards.org/cgi-bin/carddisp.pl?gene=FCGR3B">https://www.genecards.org/cgi-bin/carddisp.pl?gene=FCGR3B</a>   |
|   | ELOC    | Elongin C                                                               | Protein Coding | 48 | GC08M073939 | 2.512938499 | <a href="https://www.genecards.org/cgi-bin/carddisp.pl?gene=ELOC">https://www.genecards.org/cgi-bin/carddisp.pl?gene=ELOC</a>       |
|   | CA3     | Carbonic Anhydrase 3                                                    | Protein Coding | 48 | GC08P085373 | 2.505985737 | <a href="https://www.genecards.org/cgi-bin/carddisp.pl?gene=CA3">https://www.genecards.org/cgi-bin/carddisp.pl?gene=CA3</a>         |
|   | DDX1    | DEAD-Box Helicase 1                                                     | Protein Coding | 50 | GC02P015591 | 2.50277853  | <a href="https://www.genecards.org/cgi-bin/carddisp.pl?gene=DDX1">https://www.genecards.org/cgi-bin/carddisp.pl?gene=DDX1</a>       |
|   | SOCS2   | Suppressor Of Cytokine Signaling 2                                      | Protein Coding | 50 | GC12P093569 | 2.50228858  | <a href="https://www.genecards.org/cgi-bin/carddisp.pl?gene=SOCS2">https://www.genecards.org/cgi-bin/carddisp.pl?gene=SOCS2</a>     |
|   | BAZ2B   | Bromodomain Adjacent To Zinc Finger Domain 2B                           | Protein Coding | 47 | GC02M159318 | 2.50156641  | <a href="https://www.genecards.org/cgi-bin/carddisp.pl?gene=BAZ2B">https://www.genecards.org/cgi-bin/carddisp.pl?gene=BAZ2B</a>     |
|   | KISS1R  | KISS1 Receptor                                                          | Protein Coding | 53 | GC19P000917 | 2.501128435 | <a href="https://www.genecards.org/cgi-bin/carddisp.pl?gene=KISS1R">https://www.genecards.org/cgi-bin/carddisp.pl?gene=KISS1R</a>   |
|   | ENPP7   | Ectonucleotide Pyrophosphatase/Phosphodiesterase 7                      | Protein Coding | 44 | GC17P079730 | 2.501049042 | <a href="https://www.genecards.org/cgi-bin/carddisp.pl?gene=ENPP7">https://www.genecards.org/cgi-bin/carddisp.pl?gene=ENPP7</a>     |
|   | RPS6KA3 | Ribosomal Protein S6 Kinase A3                                          | Protein Coding | 59 | GC0XM020149 | 2.500823259 | <a href="https://www.genecards.org/cgi-bin/carddisp.pl?gene=RPS6KA3">https://www.genecards.org/cgi-bin/carddisp.pl?gene=RPS6KA3</a> |

|          |                                                |                |    |             |             |                                                                                                                                       |
|----------|------------------------------------------------|----------------|----|-------------|-------------|---------------------------------------------------------------------------------------------------------------------------------------|
| TEK      | TEK Receptor Tyrosine Kinase                   | Protein Coding | 58 | GC09P027109 | 2.500086546 | <a href="https://www.genecards.org/cgi-bin/carddisp.pl?gene=TEK">https://www.genecards.org/cgi-bin/carddisp.pl?gene=TEK</a>           |
| CSK      | C-Terminal Src Kinase                          | Protein Coding | 53 | GC15P074782 | 2.496485472 | <a href="https://www.genecards.org/cgi-bin/carddisp.pl?gene=CSK">https://www.genecards.org/cgi-bin/carddisp.pl?gene=CSK</a>           |
| MPL      | MPL Proto-Oncogene, Thrombopoietin Receptor    | Protein Coding | 55 | GC01P043337 | 2.496141434 | <a href="https://www.genecards.org/cgi-bin/carddisp.pl?gene=MPL">https://www.genecards.org/cgi-bin/carddisp.pl?gene=MPL</a>           |
| PAPPA    | Pappalysin 1                                   | Protein Coding | 50 | GC09P119606 | 2.495812654 | <a href="https://www.genecards.org/cgi-bin/carddisp.pl?gene=PAPPA">https://www.genecards.org/cgi-bin/carddisp.pl?gene=PAPPA</a>       |
| ARRB2    | Arrestin Beta 2                                | Protein Coding | 51 | GC17P004711 | 2.491093874 | <a href="https://www.genecards.org/cgi-bin/carddisp.pl?gene=ARRB2">https://www.genecards.org/cgi-bin/carddisp.pl?gene=ARRB2</a>       |
| SPI1     | Spi-1 Proto-Oncogene                           | Protein Coding | 50 | GC11M099368 | 2.48957324  | <a href="https://www.genecards.org/cgi-bin/carddisp.pl?gene=SPI1">https://www.genecards.org/cgi-bin/carddisp.pl?gene=SPI1</a>         |
| EPOR     | Erythropoietin Receptor                        | Protein Coding | 56 | GC19M011377 | 2.486668587 | <a href="https://www.genecards.org/cgi-bin/carddisp.pl?gene=EPOR">https://www.genecards.org/cgi-bin/carddisp.pl?gene=EPOR</a>         |
| PRKCG    | Protein Kinase C Gamma                         | Protein Coding | 58 | GC19P053879 | 2.486482143 | <a href="https://www.genecards.org/cgi-bin/carddisp.pl?gene=PRKCG">https://www.genecards.org/cgi-bin/carddisp.pl?gene=PRKCG</a>       |
| ROS1     | ROS Proto-Oncogene 1, Receptor Tyrosine Kinase | Protein Coding | 53 | GC06M117287 | 2.483052492 | <a href="https://www.genecards.org/cgi-bin/carddisp.pl?gene=ROS1">https://www.genecards.org/cgi-bin/carddisp.pl?gene=ROS1</a>         |
| SULT1C2  | Sulfotransferase Family 1C Member 2            | Protein Coding | 48 | GC02P108288 | 2.480620861 | <a href="https://www.genecards.org/cgi-bin/carddisp.pl?gene=SULT1C2">https://www.genecards.org/cgi-bin/carddisp.pl?gene=SULT1C2</a>   |
| IL33     | Interleukin 33                                 | Protein Coding | 46 | GC09P007685 | 2.480547905 | <a href="https://www.genecards.org/cgi-bin/carddisp.pl?gene=IL33">https://www.genecards.org/cgi-bin/carddisp.pl?gene=IL33</a>         |
| C5AR1    | Complement C5a Receptor 1                      | Protein Coding | 51 | GC19P047290 | 2.479447842 | <a href="https://www.genecards.org/cgi-bin/carddisp.pl?gene=C5AR1">https://www.genecards.org/cgi-bin/carddisp.pl?gene=C5AR1</a>       |
| TMPRSS15 | Transmembrane Serine Protease 15               | Protein Coding | 51 | GC21M018269 | 2.477105141 | <a href="https://www.genecards.org/cgi-bin/carddisp.pl?gene=TMPRSS15">https://www.genecards.org/cgi-bin/carddisp.pl?gene=TMPRSS15</a> |
| CHI3L1   | Chitinase 3 Like 1                             | Protein Coding | 51 | GC01M203148 | 2.477016211 | <a href="https://www.genecards.org/cgi-bin/carddisp.pl?gene=CHI3L1">https://www.genecards.org/cgi-bin/carddisp.pl?gene=CHI3L1</a>     |
| DAXX     | Death Domain Associated Protein                | Protein Coding | 50 | GC06M033318 | 2.475946665 | <a href="https://www.genecards.org/cgi-bin/carddisp.pl?gene=DAXX">https://www.genecards.org/cgi-bin/carddisp.pl?gene=DAXX</a>         |

|        |                                              |                |    |             |             |                                                                                                                                   |
|--------|----------------------------------------------|----------------|----|-------------|-------------|-----------------------------------------------------------------------------------------------------------------------------------|
| MTF1   | Metal Regulatory Transcription Factor 1      | Protein Coding | 47 | GC01M037810 | 2.473935127 | <a href="https://www.genecards.org/cgi-bin/carddisp.pl?gene=MTF1">https://www.genecards.org/cgi-bin/carddisp.pl?gene=MTF1</a>     |
| ITIH4  | Inter-Alpha-Trypsin Inhibitor Heavy Chain 4  | Protein Coding | 50 | GC03M052812 | 2.473416805 | <a href="https://www.genecards.org/cgi-bin/carddisp.pl?gene=ITIH4">https://www.genecards.org/cgi-bin/carddisp.pl?gene=ITIH4</a>   |
| GIPC1  | GIPC PDZ Domain Containing Family Member 1   | Protein Coding | 51 | GC19M014689 | 2.472416639 | <a href="https://www.genecards.org/cgi-bin/carddisp.pl?gene=GIPC1">https://www.genecards.org/cgi-bin/carddisp.pl?gene=GIPC1</a>   |
| ILK    | Integrin Linked Kinase                       | Protein Coding | 52 | GC11P006604 | 2.47030139  | <a href="https://www.genecards.org/cgi-bin/carddisp.pl?gene=ILK">https://www.genecards.org/cgi-bin/carddisp.pl?gene=ILK</a>       |
| KRT16  | Keratin 16                                   | Protein Coding | 50 | GC17M041609 | 2.468029022 | <a href="https://www.genecards.org/cgi-bin/carddisp.pl?gene=KRT16">https://www.genecards.org/cgi-bin/carddisp.pl?gene=KRT16</a>   |
| NPR1   | Natriuretic Peptide Receptor 1               | Protein Coding | 53 | GC01P153922 | 2.459864855 | <a href="https://www.genecards.org/cgi-bin/carddisp.pl?gene=NPR1">https://www.genecards.org/cgi-bin/carddisp.pl?gene=NPR1</a>     |
| CRK    | CRK Proto-Oncogene, Adaptor Protein          | Protein Coding | 50 | GC17M001420 | 2.459316969 | <a href="https://www.genecards.org/cgi-bin/carddisp.pl?gene=CRK">https://www.genecards.org/cgi-bin/carddisp.pl?gene=CRK</a>       |
| VAMP2  | Vesicle Associated Membrane Protein 2        | Protein Coding | 50 | GC17M011050 | 2.459011793 | <a href="https://www.genecards.org/cgi-bin/carddisp.pl?gene=VAMP2">https://www.genecards.org/cgi-bin/carddisp.pl?gene=VAMP2</a>   |
| PDYN   | Prodynorphin                                 | Protein Coding | 51 | GC20M001978 | 2.456013918 | <a href="https://www.genecards.org/cgi-bin/carddisp.pl?gene=PDYN">https://www.genecards.org/cgi-bin/carddisp.pl?gene=PDYN</a>     |
| PTGER1 | Prostaglandin E Receptor 1                   | Protein Coding | 47 | GC19M014687 | 2.453777313 | <a href="https://www.genecards.org/cgi-bin/carddisp.pl?gene=PTGER1">https://www.genecards.org/cgi-bin/carddisp.pl?gene=PTGER1</a> |
| PAX2   | Paired Box 2                                 | Protein Coding | 53 | GC10P100735 | 2.451199532 | <a href="https://www.genecards.org/cgi-bin/carddisp.pl?gene=PAX2">https://www.genecards.org/cgi-bin/carddisp.pl?gene=PAX2</a>     |
| HSPB2  | Heat Shock Protein Family B (Small) Member 2 | Protein Coding | 46 | GC11P112012 | 2.450934172 | <a href="https://www.genecards.org/cgi-bin/carddisp.pl?gene=HSPB2">https://www.genecards.org/cgi-bin/carddisp.pl?gene=HSPB2</a>   |
| BLMH   | Bleomycin Hydrolase                          | Protein Coding | 50 | GC17M030248 | 2.450750828 | <a href="https://www.genecards.org/cgi-bin/carddisp.pl?gene=BLMH">https://www.genecards.org/cgi-bin/carddisp.pl?gene=BLMH</a>     |
| AIF1   | Allograft Inflammatory Factor 1              | Protein Coding | 45 | GC06P092153 | 2.450322866 | <a href="https://www.genecards.org/cgi-bin/carddisp.pl?gene=AIF1">https://www.genecards.org/cgi-bin/carddisp.pl?gene=AIF1</a>     |
| NRG3   | Neuregulin 3                                 | Protein Coding | 50 | GC10P094473 | 2.449428082 | <a href="https://www.genecards.org/cgi-bin/carddisp.pl?gene=NRG3">https://www.genecards.org/cgi-bin/carddisp.pl?gene=NRG3</a>     |

|        |                                                         |                |    |             |             |                                                                                                                                   |
|--------|---------------------------------------------------------|----------------|----|-------------|-------------|-----------------------------------------------------------------------------------------------------------------------------------|
| VEGFC  | Vascular Endothelial Growth Factor C                    | Protein Coding | 53 | GC04M176683 | 2.448032379 | <a href="https://www.genecards.org/cgi-bin/carddisp.pl?gene=VEGFC">https://www.genecards.org/cgi-bin/carddisp.pl?gene=VEGFC</a>   |
| PIGW   | Phosphatidylinositol Glycan Anchor Biosynthesis Class W | Protein Coding | 43 | GC17P036534 | 2.446613312 | <a href="https://www.genecards.org/cgi-bin/carddisp.pl?gene=PIGW">https://www.genecards.org/cgi-bin/carddisp.pl?gene=PIGW</a>     |
| SPRY2  | Sprouty RTK Signaling Antagonist 2                      | Protein Coding | 52 | GC13M080335 | 2.445711136 | <a href="https://www.genecards.org/cgi-bin/carddisp.pl?gene=SPRY2">https://www.genecards.org/cgi-bin/carddisp.pl?gene=SPRY2</a>   |
| IQGAP1 | IQ Motif Containing GTPase Activating Protein 1         | Protein Coding | 50 | GC15P090388 | 2.445117474 | <a href="https://www.genecards.org/cgi-bin/carddisp.pl?gene=IQGAP1">https://www.genecards.org/cgi-bin/carddisp.pl?gene=IQGAP1</a> |
| PVALB  | Parvalbumin                                             | Protein Coding | 47 | GC22M036800 | 2.444863796 | <a href="https://www.genecards.org/cgi-bin/carddisp.pl?gene=PVALB">https://www.genecards.org/cgi-bin/carddisp.pl?gene=PVALB</a>   |
| AMDHD1 | Amidohydrolase Domain Containing 1                      | Protein Coding | 43 | GC12P095943 | 2.444291115 | <a href="https://www.genecards.org/cgi-bin/carddisp.pl?gene=AMDHD1">https://www.genecards.org/cgi-bin/carddisp.pl?gene=AMDHD1</a> |
| BAK1   | BCL2 Antagonist/Killer 1                                | Protein Coding | 52 | GC06M033572 | 2.443449974 | <a href="https://www.genecards.org/cgi-bin/carddisp.pl?gene=BAK1">https://www.genecards.org/cgi-bin/carddisp.pl?gene=BAK1</a>     |
| NRG1   | Neuregulin 1                                            | Protein Coding | 55 | GC08P031639 | 2.442706108 | <a href="https://www.genecards.org/cgi-bin/carddisp.pl?gene=NRG1">https://www.genecards.org/cgi-bin/carddisp.pl?gene=NRG1</a>     |
| CPB2   | Carboxypeptidase B2                                     | Protein Coding | 51 | GC13M046053 | 2.441707611 | <a href="https://www.genecards.org/cgi-bin/carddisp.pl?gene=CPB2">https://www.genecards.org/cgi-bin/carddisp.pl?gene=CPB2</a>     |
| EZR    | Ezrin                                                   | Protein Coding | 53 | GC06M158765 | 2.441425562 | <a href="https://www.genecards.org/cgi-bin/carddisp.pl?gene=EZR">https://www.genecards.org/cgi-bin/carddisp.pl?gene=EZR</a>       |
| AACS   | Acetoacetyl-CoA Synthetase                              | Protein Coding | 46 | GC12P125065 | 2.440374613 | <a href="https://www.genecards.org/cgi-bin/carddisp.pl?gene=AACS">https://www.genecards.org/cgi-bin/carddisp.pl?gene=AACS</a>     |
| BACH2  | BTB Domain And CNC Homolog 2                            | Protein Coding | 50 | GC06M089926 | 2.43955183  | <a href="https://www.genecards.org/cgi-bin/carddisp.pl?gene=BACH2">https://www.genecards.org/cgi-bin/carddisp.pl?gene=BACH2</a>   |
| NTF3   | Neurotrophin 3                                          | Protein Coding | 51 | GC12P023503 | 2.429748535 | <a href="https://www.genecards.org/cgi-bin/carddisp.pl?gene=NTF3">https://www.genecards.org/cgi-bin/carddisp.pl?gene=NTF3</a>     |
| APLP2  | Amyloid Beta Precursor Like Protein 2                   | Protein Coding | 49 | GC11P130069 | 2.429710865 | <a href="https://www.genecards.org/cgi-bin/carddisp.pl?gene=APLP2">https://www.genecards.org/cgi-bin/carddisp.pl?gene=APLP2</a>   |
| EIF4G1 | Eukaryotic Translation Initiation Factor 4 Gamma 1      | Protein Coding | 54 | GC03P184314 | 2.428409338 | <a href="https://www.genecards.org/cgi-bin/carddisp.pl?gene=EIF4G1">https://www.genecards.org/cgi-bin/carddisp.pl?gene=EIF4G1</a> |

|              |                                                |                    |    |             |             |                                                                                                                                               |
|--------------|------------------------------------------------|--------------------|----|-------------|-------------|-----------------------------------------------------------------------------------------------------------------------------------------------|
| MAP2         | Microtubule Associated Protein 2               | Protein Coding     | 51 | GC02P209424 | 2.428044796 | <a href="https://www.genecards.org/cgi-bin/carddisp.pl?gene=MAP2">https://www.genecards.org/cgi-bin/carddisp.pl?gene=MAP2</a>                 |
| PGF          | Placental Growth Factor                        | Protein Coding     | 50 | GC14M074941 | 2.426606417 | <a href="https://www.genecards.org/cgi-bin/carddisp.pl?gene=PGF">https://www.genecards.org/cgi-bin/carddisp.pl?gene=PGF</a>                   |
| WEE1         | WEE1 G2 Checkpoint Kinase                      | Protein Coding     | 54 | GC11P009573 | 2.426380873 | <a href="https://www.genecards.org/cgi-bin/carddisp.pl?gene=WEE1">https://www.genecards.org/cgi-bin/carddisp.pl?gene=WEE1</a>                 |
| FCGRT        | Fc Gamma Receptor And Transporter              | Protein Coding     | 50 | GC19P049506 | 2.42273283  | <a href="https://www.genecards.org/cgi-bin/carddisp.pl?gene=FCGRT">https://www.genecards.org/cgi-bin/carddisp.pl?gene=FCGRT</a>               |
| CCL27        | C-C Motif Chemokine Ligand 27                  | Protein Coding     | 42 | GC09M034662 | 2.421966791 | <a href="https://www.genecards.org/cgi-bin/carddisp.pl?gene=CCL27">https://www.genecards.org/cgi-bin/carddisp.pl?gene=CCL27</a>               |
| CD9          | CD9 Molecule                                   | Protein Coding     | 51 | GC12P023510 | 2.421341419 | <a href="https://www.genecards.org/cgi-bin/carddisp.pl?gene=CD9">https://www.genecards.org/cgi-bin/carddisp.pl?gene=CD9</a>                   |
| MSN          | Moesin                                         | Protein Coding     | 55 | GC0XP065588 | 2.420360327 | <a href="https://www.genecards.org/cgi-bin/carddisp.pl?gene=MSN">https://www.genecards.org/cgi-bin/carddisp.pl?gene=MSN</a>                   |
| LOC110806262 | Solute Carrier Family 6 Member 4 Gene Promoter | Functional Element | 3  | GC17P030235 | 2.417027235 | <a href="https://www.genecards.org/cgi-bin/carddisp.pl?gene=LOC110806262">https://www.genecards.org/cgi-bin/carddisp.pl?gene=LOC110806262</a> |
| BDKRB2       | Bradykinin Receptor B2                         | Protein Coding     | 52 | GC14P096205 | 2.415146828 | <a href="https://www.genecards.org/cgi-bin/carddisp.pl?gene=BDKRB2">https://www.genecards.org/cgi-bin/carddisp.pl?gene=BDKRB2</a>             |
| GGCT         | Gamma-Glutamylcyclotransferase                 | Protein Coding     | 46 | GC07M030496 | 2.414832115 | <a href="https://www.genecards.org/cgi-bin/carddisp.pl?gene=GGCT">https://www.genecards.org/cgi-bin/carddisp.pl?gene=GGCT</a>                 |
| MPZ          | Myelin Protein Zero                            | Protein Coding     | 52 | GC01M161304 | 2.414045811 | <a href="https://www.genecards.org/cgi-bin/carddisp.pl?gene=MPZ">https://www.genecards.org/cgi-bin/carddisp.pl?gene=MPZ</a>                   |
| BMPR1B       | Bone Morphogenetic Protein Receptor Type 1B    | Protein Coding     | 56 | GC04P094757 | 2.412981272 | <a href="https://www.genecards.org/cgi-bin/carddisp.pl?gene=BMPR1B">https://www.genecards.org/cgi-bin/carddisp.pl?gene=BMPR1B</a>             |
| CHGB         | Chromogranin B                                 | Protein Coding     | 48 | GC20P005911 | 2.411474943 | <a href="https://www.genecards.org/cgi-bin/carddisp.pl?gene=CHGB">https://www.genecards.org/cgi-bin/carddisp.pl?gene=CHGB</a>                 |
| ITGA3        | Integrin Subunit Alpha 3                       | Protein Coding     | 55 | GC17P050055 | 2.40312171  | <a href="https://www.genecards.org/cgi-bin/carddisp.pl?gene=ITGA3">https://www.genecards.org/cgi-bin/carddisp.pl?gene=ITGA3</a>               |
| TPT1         | Tumor Protein, Translationally-Controlled 1    | Protein Coding     | 53 | GC13M045333 | 2.400903463 | <a href="https://www.genecards.org/cgi-bin/carddisp.pl?gene=TPT1">https://www.genecards.org/cgi-bin/carddisp.pl?gene=TPT1</a>                 |

|          |                                                       |                |    |             |             |                                                                                                                                       |
|----------|-------------------------------------------------------|----------------|----|-------------|-------------|---------------------------------------------------------------------------------------------------------------------------------------|
| PIK3R3   | Phosphoinositide-3-Kinase Regulatory Subunit 3        | Protein Coding | 50 | GC01M046041 | 2.399698496 | <a href="https://www.genecards.org/cgi-bin/carddisp.pl?gene=PIK3R3">https://www.genecards.org/cgi-bin/carddisp.pl?gene=PIK3R3</a>     |
| FSHB     | Follicle Stimulating Hormone Subunit Beta             | Protein Coding | 51 | GC11P030210 | 2.397188187 | <a href="https://www.genecards.org/cgi-bin/carddisp.pl?gene=FSHB">https://www.genecards.org/cgi-bin/carddisp.pl?gene=FSHB</a>         |
| GABBR1   | Gamma-Aminobutyric Acid Type B Receptor Subunit 1     | Protein Coding | 53 | GC06M029555 | 2.396708727 | <a href="https://www.genecards.org/cgi-bin/carddisp.pl?gene=GABBR1">https://www.genecards.org/cgi-bin/carddisp.pl?gene=GABBR1</a>     |
| PICK1    | Protein Interacting With PRKCA 1                      | Protein Coding | 50 | GC22P038056 | 2.396637917 | <a href="https://www.genecards.org/cgi-bin/carddisp.pl?gene=PICK1">https://www.genecards.org/cgi-bin/carddisp.pl?gene=PICK1</a>       |
| CAMK4    | Calcium/Calmodulin Dependent Protein Kinase IV        | Protein Coding | 52 | GC05P111223 | 2.395980835 | <a href="https://www.genecards.org/cgi-bin/carddisp.pl?gene=CAMK4">https://www.genecards.org/cgi-bin/carddisp.pl?gene=CAMK4</a>       |
| SND1     | Staphylococcal Nuclease And Tudor Domain Containing 1 | Protein Coding | 48 | GC07P127652 | 2.395704985 | <a href="https://www.genecards.org/cgi-bin/carddisp.pl?gene=SND1">https://www.genecards.org/cgi-bin/carddisp.pl?gene=SND1</a>         |
| HDAC7    | Histone Deacetylase 7                                 | Protein Coding | 53 | GC12M047782 | 2.395572424 | <a href="https://www.genecards.org/cgi-bin/carddisp.pl?gene=HDAC7">https://www.genecards.org/cgi-bin/carddisp.pl?gene=HDAC7</a>       |
| SERPINB3 | Serpin Family B Member 3                              | Protein Coding | 47 | GC18M063655 | 2.395550489 | <a href="https://www.genecards.org/cgi-bin/carddisp.pl?gene=SERPINB3">https://www.genecards.org/cgi-bin/carddisp.pl?gene=SERPINB3</a> |
| EGR1     | Early Growth Response 1                               | Protein Coding | 52 | GC05P138465 | 2.392300129 | <a href="https://www.genecards.org/cgi-bin/carddisp.pl?gene=EGR1">https://www.genecards.org/cgi-bin/carddisp.pl?gene=EGR1</a>         |
| IRS4     | Insulin Receptor Substrate 4                          | Protein Coding | 47 | GC0XM108720 | 2.391109467 | <a href="https://www.genecards.org/cgi-bin/carddisp.pl?gene=IRS4">https://www.genecards.org/cgi-bin/carddisp.pl?gene=IRS4</a>         |
| EIF3A    | Eukaryotic Translation Initiation Factor 3 Subunit A  | Protein Coding | 51 | GC10M119034 | 2.389075279 | <a href="https://www.genecards.org/cgi-bin/carddisp.pl?gene=EIF3A">https://www.genecards.org/cgi-bin/carddisp.pl?gene=EIF3A</a>       |
| GDNF     | Glial Cell Derived Neurotrophic Factor                | Protein Coding | 56 | GC05M037812 | 2.386838436 | <a href="https://www.genecards.org/cgi-bin/carddisp.pl?gene=GDNF">https://www.genecards.org/cgi-bin/carddisp.pl?gene=GDNF</a>         |
| ARRB1    | Arrestin Beta 1                                       | Protein Coding | 51 | GC11M100029 | 2.385669708 | <a href="https://www.genecards.org/cgi-bin/carddisp.pl?gene=ARRB1">https://www.genecards.org/cgi-bin/carddisp.pl?gene=ARRB1</a>       |
| KRT5     | Keratin 5                                             | Protein Coding | 52 | GC12M052514 | 2.385361433 | <a href="https://www.genecards.org/cgi-bin/carddisp.pl?gene=KRT5">https://www.genecards.org/cgi-bin/carddisp.pl?gene=KRT5</a>         |
| SLC22A9  | Solute Carrier Family 22 Member 9                     | Protein Coding | 43 | GC11P063388 | 2.381622076 | <a href="https://www.genecards.org/cgi-bin/carddisp.pl?gene=SLC22A9">https://www.genecards.org/cgi-bin/carddisp.pl?gene=SLC22A9</a>   |

|        |                                                  |                |    |             |             |                                                                                                                                   |
|--------|--------------------------------------------------|----------------|----|-------------|-------------|-----------------------------------------------------------------------------------------------------------------------------------|
| MUC16  | Mucin 16, Cell Surface Associated                | Protein Coding | 44 | GC19M008848 | 2.38140893  | <a href="https://www.genecards.org/cgi-bin/carddisp.pl?gene=MUC16">https://www.genecards.org/cgi-bin/carddisp.pl?gene=MUC16</a>   |
| ITCH   | Itchy E3 Ubiquitin Protein Ligase                | Protein Coding | 53 | GC20P034363 | 2.380997658 | <a href="https://www.genecards.org/cgi-bin/carddisp.pl?gene=ITCH">https://www.genecards.org/cgi-bin/carddisp.pl?gene=ITCH</a>     |
| VCL    | Vinculin                                         | Protein Coding | 54 | GC10P073995 | 2.380882263 | <a href="https://www.genecards.org/cgi-bin/carddisp.pl?gene=VCL">https://www.genecards.org/cgi-bin/carddisp.pl?gene=VCL</a>       |
| TUBA1B | Tubulin Alpha 1b                                 | Protein Coding | 51 | GC12M049127 | 2.375025034 | <a href="https://www.genecards.org/cgi-bin/carddisp.pl?gene=TUBA1B">https://www.genecards.org/cgi-bin/carddisp.pl?gene=TUBA1B</a> |
| EEF1D  | Eukaryotic Translation Elongation Factor 1 Delta | Protein Coding | 47 | GC08M143579 | 2.374794006 | <a href="https://www.genecards.org/cgi-bin/carddisp.pl?gene=EEF1D">https://www.genecards.org/cgi-bin/carddisp.pl?gene=EEF1D</a>   |
| CAMP   | Cathelicidin Antimicrobial Peptide               | Protein Coding | 46 | GC03P049961 | 2.373255253 | <a href="https://www.genecards.org/cgi-bin/carddisp.pl?gene=CAMP">https://www.genecards.org/cgi-bin/carddisp.pl?gene=CAMP</a>     |
| ITGB4  | Integrin Subunit Beta 4                          | Protein Coding | 56 | GC17P075721 | 2.372350454 | <a href="https://www.genecards.org/cgi-bin/carddisp.pl?gene=ITGB4">https://www.genecards.org/cgi-bin/carddisp.pl?gene=ITGB4</a>   |
| ASIC1  | Acid Sensing Ion Channel Subunit 1               | Protein Coding | 52 | GC12P050057 | 2.370299101 | <a href="https://www.genecards.org/cgi-bin/carddisp.pl?gene=ASIC1">https://www.genecards.org/cgi-bin/carddisp.pl?gene=ASIC1</a>   |
| GTF2I  | General Transcription Factor Iii                 | Protein Coding | 47 | GC07P076418 | 2.37008667  | <a href="https://www.genecards.org/cgi-bin/carddisp.pl?gene=GTF2I">https://www.genecards.org/cgi-bin/carddisp.pl?gene=GTF2I</a>   |
| CYB561 | Cytochrome B561                                  | Protein Coding | 48 | GC17M063432 | 2.368448734 | <a href="https://www.genecards.org/cgi-bin/carddisp.pl?gene=CYB561">https://www.genecards.org/cgi-bin/carddisp.pl?gene=CYB561</a> |
| MINPP1 | Multiple Inositol-Polyphosphate Phosphatase 1    | Protein Coding | 53 | GC10P087504 | 2.367403507 | <a href="https://www.genecards.org/cgi-bin/carddisp.pl?gene=MINPP1">https://www.genecards.org/cgi-bin/carddisp.pl?gene=MINPP1</a> |
| STMN1  | Stathmin 1                                       | Protein Coding | 51 | GC01M025884 | 2.365449429 | <a href="https://www.genecards.org/cgi-bin/carddisp.pl?gene=STMN1">https://www.genecards.org/cgi-bin/carddisp.pl?gene=STMN1</a>   |
| CISH   | Cytokine Inducible SH2 Containing Protein        | Protein Coding | 52 | GC03M051766 | 2.364514351 | <a href="https://www.genecards.org/cgi-bin/carddisp.pl?gene=CISH">https://www.genecards.org/cgi-bin/carddisp.pl?gene=CISH</a>     |
| PELP1  | Proline, Glutamate And Leucine Rich Protein 1    | Protein Coding | 46 | GC17M004669 | 2.364390135 | <a href="https://www.genecards.org/cgi-bin/carddisp.pl?gene=PELP1">https://www.genecards.org/cgi-bin/carddisp.pl?gene=PELP1</a>   |
| CXADR  | CXADR Ig-Like Cell Adhesion Molecule             | Protein Coding | 50 | GC21P017513 | 2.361170053 | <a href="https://www.genecards.org/cgi-bin/carddisp.pl?gene=CXADR">https://www.genecards.org/cgi-bin/carddisp.pl?gene=CXADR</a>   |

|         |                                                     |                |    |             |             |                                                                                                                                     |
|---------|-----------------------------------------------------|----------------|----|-------------|-------------|-------------------------------------------------------------------------------------------------------------------------------------|
| CTTN    | Cortactin                                           | Protein Coding | 50 | GC11P070398 | 2.358932734 | <a href="https://www.genecards.org/cgi-bin/carddisp.pl?gene=CTTN">https://www.genecards.org/cgi-bin/carddisp.pl?gene=CTTN</a>       |
| FOLR3   | Folate Receptor Gamma                               | Protein Coding | 46 | GC11P072114 | 2.358604431 | <a href="https://www.genecards.org/cgi-bin/carddisp.pl?gene=FOLR3">https://www.genecards.org/cgi-bin/carddisp.pl?gene=FOLR3</a>     |
| HAT1    | Histone Acetyltransferase 1                         | Protein Coding | 49 | GC02P171922 | 2.356448412 | <a href="https://www.genecards.org/cgi-bin/carddisp.pl?gene=HAT1">https://www.genecards.org/cgi-bin/carddisp.pl?gene=HAT1</a>       |
| IFI27   | Interferon Alpha Inducible Protein 27               | Protein Coding | 44 | GC14P094104 | 2.356122971 | <a href="https://www.genecards.org/cgi-bin/carddisp.pl?gene=IFI27">https://www.genecards.org/cgi-bin/carddisp.pl?gene=IFI27</a>     |
| RYR2    | Ryanodine Receptor 2                                | Protein Coding | 53 | GC01P237042 | 2.352290869 | <a href="https://www.genecards.org/cgi-bin/carddisp.pl?gene=RYR2">https://www.genecards.org/cgi-bin/carddisp.pl?gene=RYR2</a>       |
| RHO     | Rhodopsin                                           | Protein Coding | 55 | GC03P134990 | 2.350380659 | <a href="https://www.genecards.org/cgi-bin/carddisp.pl?gene=RHO">https://www.genecards.org/cgi-bin/carddisp.pl?gene=RHO</a>         |
| HAVCR1  | Hepatitis A Virus Cellular Receptor 1               | Protein Coding | 50 | GC05M157028 | 2.349440813 | <a href="https://www.genecards.org/cgi-bin/carddisp.pl?gene=HAVCR1">https://www.genecards.org/cgi-bin/carddisp.pl?gene=HAVCR1</a>   |
| OR51E2  | Olfactory Receptor Family 51 Subfamily E Member 2   | Protein Coding | 38 | GC11M004680 | 2.346513271 | <a href="https://www.genecards.org/cgi-bin/carddisp.pl?gene=OR51E2">https://www.genecards.org/cgi-bin/carddisp.pl?gene=OR51E2</a>   |
| CA14    | Carbonic Anhydrase 14                               | Protein Coding | 50 | GC01P150436 | 2.342910767 | <a href="https://www.genecards.org/cgi-bin/carddisp.pl?gene=CA14">https://www.genecards.org/cgi-bin/carddisp.pl?gene=CA14</a>       |
| BCL2L11 | BCL2 Like 11                                        | Protein Coding | 52 | GC02P111119 | 2.341534853 | <a href="https://www.genecards.org/cgi-bin/carddisp.pl?gene=BCL2L11">https://www.genecards.org/cgi-bin/carddisp.pl?gene=BCL2L11</a> |
| IRF5    | Interferon Regulatory Factor 5                      | Protein Coding | 53 | GC07P128937 | 2.339133978 | <a href="https://www.genecards.org/cgi-bin/carddisp.pl?gene=IRF5">https://www.genecards.org/cgi-bin/carddisp.pl?gene=IRF5</a>       |
| GPRC6A  | G Protein-Coupled Receptor Class C Group 6 Member A | Protein Coding | 44 | GC06M116793 | 2.336325645 | <a href="https://www.genecards.org/cgi-bin/carddisp.pl?gene=GPRC6A">https://www.genecards.org/cgi-bin/carddisp.pl?gene=GPRC6A</a>   |
| S1PR1   | Sphingosine-1-Phosphate Receptor 1                  | Protein Coding | 52 | GC01P101236 | 2.336192608 | <a href="https://www.genecards.org/cgi-bin/carddisp.pl?gene=S1PR1">https://www.genecards.org/cgi-bin/carddisp.pl?gene=S1PR1</a>     |
| H2AX    | H2A.X Variant Histone                               | Protein Coding | 50 | GC11M119285 | 2.332493782 | <a href="https://www.genecards.org/cgi-bin/carddisp.pl?gene=H2AX">https://www.genecards.org/cgi-bin/carddisp.pl?gene=H2AX</a>       |
| MITF    | Melanocyte Inducing Transcription Factor            | Protein Coding | 55 | GC03P069788 | 2.331109762 | <a href="https://www.genecards.org/cgi-bin/carddisp.pl?gene=MITF">https://www.genecards.org/cgi-bin/carddisp.pl?gene=MITF</a>       |



|           |                                                                  |                |    |             |             |                                                                                                                                         |
|-----------|------------------------------------------------------------------|----------------|----|-------------|-------------|-----------------------------------------------------------------------------------------------------------------------------------------|
| RGS2      | Regulator Of G Protein Signaling 2                               | Protein Coding | 48 | GC01P192809 | 2.330634117 | <a href="https://www.genecards.org/cgi-bin/carddisp.pl?gene=RGS2">https://www.genecards.org/cgi-bin/carddisp.pl?gene=RGS2</a>           |
| LPAR3     | Lysophosphatidic Acid Receptor 3                                 | Protein Coding | 50 | GC01M084811 | 2.325584888 | <a href="https://www.genecards.org/cgi-bin/carddisp.pl?gene=LPAR3">https://www.genecards.org/cgi-bin/carddisp.pl?gene=LPAR3</a>         |
| TGFB3     | Transforming Growth Factor Beta 3                                | Protein Coding | 54 | GC14M075958 | 2.324998617 | <a href="https://www.genecards.org/cgi-bin/carddisp.pl?gene=TGFB3">https://www.genecards.org/cgi-bin/carddisp.pl?gene=TGFB3</a>         |
| PTP4A2    | Protein Tyrosine Phosphatase 4A2                                 | Protein Coding | 48 | GC01M031910 | 2.324296236 | <a href="https://www.genecards.org/cgi-bin/carddisp.pl?gene=PTP4A2">https://www.genecards.org/cgi-bin/carddisp.pl?gene=PTP4A2</a>       |
| TNFRSF10B | TNF Receptor Superfamily Member 10b                              | Protein Coding | 57 | GC08M023020 | 2.323630333 | <a href="https://www.genecards.org/cgi-bin/carddisp.pl?gene=TNFRSF10B">https://www.genecards.org/cgi-bin/carddisp.pl?gene=TNFRSF10B</a> |
| SLC15A2   | Solute Carrier Family 15 Member 2                                | Protein Coding | 47 | GC03P121894 | 2.316164017 | <a href="https://www.genecards.org/cgi-bin/carddisp.pl?gene=SLC15A2">https://www.genecards.org/cgi-bin/carddisp.pl?gene=SLC15A2</a>     |
| CLEC7A    | C-Type Lectin Domain Containing 7A                               | Protein Coding | 52 | GC12M022628 | 2.315096617 | <a href="https://www.genecards.org/cgi-bin/carddisp.pl?gene=CLEC7A">https://www.genecards.org/cgi-bin/carddisp.pl?gene=CLEC7A</a>       |
| OXSM      | 3-Oxoacyl-ACP Synthase, Mitochondrial                            | Protein Coding | 44 | GC03P025782 | 2.312613249 | <a href="https://www.genecards.org/cgi-bin/carddisp.pl?gene=OXSM">https://www.genecards.org/cgi-bin/carddisp.pl?gene=OXSM</a>           |
| GNRHR     | Gonadotropin Releasing Hormone Receptor                          | Protein Coding | 54 | GC04M067737 | 2.305584192 | <a href="https://www.genecards.org/cgi-bin/carddisp.pl?gene=GNRHR">https://www.genecards.org/cgi-bin/carddisp.pl?gene=GNRHR</a>         |
| PTPRD     | Protein Tyrosine Phosphatase Receptor Type D                     | Protein Coding | 52 | GC09M008307 | 2.301552773 | <a href="https://www.genecards.org/cgi-bin/carddisp.pl?gene=PTPRD">https://www.genecards.org/cgi-bin/carddisp.pl?gene=PTPRD</a>         |
| NPHS2     | NPHS2 Stomatin Family Member, Podocin                            | Protein Coding | 50 | GC01M179554 | 2.300552607 | <a href="https://www.genecards.org/cgi-bin/carddisp.pl?gene=NPHS2">https://www.genecards.org/cgi-bin/carddisp.pl?gene=NPHS2</a>         |
| SLC9A3R1  | SLC9A3 Regulator 1                                               | Protein Coding | 52 | GC17P074749 | 2.29944706  | <a href="https://www.genecards.org/cgi-bin/carddisp.pl?gene=SLC9A3R1">https://www.genecards.org/cgi-bin/carddisp.pl?gene=SLC9A3R1</a>   |
| KRT1      | Keratin 1                                                        | Protein Coding | 53 | GC12M052674 | 2.297845602 | <a href="https://www.genecards.org/cgi-bin/carddisp.pl?gene=KRT1">https://www.genecards.org/cgi-bin/carddisp.pl?gene=KRT1</a>           |
| EWSR1     | EWS RNA Binding Protein 1                                        | Protein Coding | 51 | GC22P044790 | 2.296663523 | <a href="https://www.genecards.org/cgi-bin/carddisp.pl?gene=EWSR1">https://www.genecards.org/cgi-bin/carddisp.pl?gene=EWSR1</a>         |
| SMG1      | SMG1 Nonsense Mediated MRNA Decay Associated PI3K Related Kinase | Protein Coding | 46 | GC16M019413 | 2.292959452 | <a href="https://www.genecards.org/cgi-bin/carddisp.pl?gene=SMG1">https://www.genecards.org/cgi-bin/carddisp.pl?gene=SMG1</a>           |

|         |                                                           |                |    |             |             |                                                                                                                                     |
|---------|-----------------------------------------------------------|----------------|----|-------------|-------------|-------------------------------------------------------------------------------------------------------------------------------------|
| CAMK2A  | Calcium/Calmodulin Dependent Protein Kinase II Alpha      | Protein Coding | 59 | GC05M150219 | 2.292059183 | <a href="https://www.genecards.org/cgi-bin/carddisp.pl?gene=CAMK2A">https://www.genecards.org/cgi-bin/carddisp.pl?gene=CAMK2A</a>   |
| CHRNA7  | Cholinergic Receptor Nicotinic Alpha 7 Subunit            | Protein Coding | 52 | GC15P031923 | 2.290010691 | <a href="https://www.genecards.org/cgi-bin/carddisp.pl?gene=CHRNA7">https://www.genecards.org/cgi-bin/carddisp.pl?gene=CHRNA7</a>   |
| RAP1A   | RAP1A, Member Of RAS Oncogene Family                      | Protein Coding | 51 | GC01P111542 | 2.289759874 | <a href="https://www.genecards.org/cgi-bin/carddisp.pl?gene=RAP1A">https://www.genecards.org/cgi-bin/carddisp.pl?gene=RAP1A</a>     |
| EIF2AK2 | Eukaryotic Translation Initiation Factor 2 Alpha Kinase 2 | Protein Coding | 56 | GC02M037099 | 2.28935051  | <a href="https://www.genecards.org/cgi-bin/carddisp.pl?gene=EIF2AK2">https://www.genecards.org/cgi-bin/carddisp.pl?gene=EIF2AK2</a> |
| IGHG1   | Immunoglobulin Heavy Constant Gamma 1 (G1m Marker)        | Protein Coding | 40 | GC14M105736 | 2.288361549 | <a href="https://www.genecards.org/cgi-bin/carddisp.pl?gene=IGHG1">https://www.genecards.org/cgi-bin/carddisp.pl?gene=IGHG1</a>     |
| PKN2    | Protein Kinase N2                                         | Protein Coding | 52 | GC01P088684 | 2.288004875 | <a href="https://www.genecards.org/cgi-bin/carddisp.pl?gene=PKN2">https://www.genecards.org/cgi-bin/carddisp.pl?gene=PKN2</a>       |
| KRT17   | Keratin 17                                                | Protein Coding | 51 | GC17M041619 | 2.285661221 | <a href="https://www.genecards.org/cgi-bin/carddisp.pl?gene=KRT17">https://www.genecards.org/cgi-bin/carddisp.pl?gene=KRT17</a>     |
| PKN1    | Protein Kinase N1                                         | Protein Coding | 56 | GC19P014433 | 2.285643816 | <a href="https://www.genecards.org/cgi-bin/carddisp.pl?gene=PKN1">https://www.genecards.org/cgi-bin/carddisp.pl?gene=PKN1</a>       |
| TTL     | Tubulin Tyrosine Ligase                                   | Protein Coding | 46 | GC02P123790 | 2.280835867 | <a href="https://www.genecards.org/cgi-bin/carddisp.pl?gene=TTL">https://www.genecards.org/cgi-bin/carddisp.pl?gene=TTL</a>         |
| GSTT2   | Glutathione S-Transferase Theta 2 (Gene/Pseudogene)       | Protein Coding | 40 | GC22P023980 | 2.280731201 | <a href="https://www.genecards.org/cgi-bin/carddisp.pl?gene=GSTT2">https://www.genecards.org/cgi-bin/carddisp.pl?gene=GSTT2</a>     |
| NPPC    | Natriuretic Peptide C                                     | Protein Coding | 48 | GC02M231921 | 2.280587196 | <a href="https://www.genecards.org/cgi-bin/carddisp.pl?gene=NPPC">https://www.genecards.org/cgi-bin/carddisp.pl?gene=NPPC</a>       |
| CR2     | Complement C3d Receptor 2                                 | Protein Coding | 53 | GC01P207454 | 2.280513048 | <a href="https://www.genecards.org/cgi-bin/carddisp.pl?gene=CR2">https://www.genecards.org/cgi-bin/carddisp.pl?gene=CR2</a>         |
| TUBB3   | Tubulin Beta 3 Class III                                  | Protein Coding | 55 | GC16P091607 | 2.279607296 | <a href="https://www.genecards.org/cgi-bin/carddisp.pl?gene=TUBB3">https://www.genecards.org/cgi-bin/carddisp.pl?gene=TUBB3</a>     |
| PHOX2B  | Paired Like Homeobox 2B                                   | Protein Coding | 51 | GC04M041746 | 2.278419018 | <a href="https://www.genecards.org/cgi-bin/carddisp.pl?gene=PHOX2B">https://www.genecards.org/cgi-bin/carddisp.pl?gene=PHOX2B</a>   |
| VEGF    | VEGF Nerve Growth Factor Inducible                        | Protein Coding | 45 | GC07M101162 | 2.278366566 | <a href="https://www.genecards.org/cgi-bin/carddisp.pl?gene=VEGF">https://www.genecards.org/cgi-bin/carddisp.pl?gene=VEGF</a>       |

|          |                                                        |                |    |             |             |                                                                                                                                       |
|----------|--------------------------------------------------------|----------------|----|-------------|-------------|---------------------------------------------------------------------------------------------------------------------------------------|
| SERPINH1 | Serpin Family H Member 1                               | Protein Coding | 53 | GC11P075562 | 2.277401924 | <a href="https://www.genecards.org/cgi-bin/carddisp.pl?gene=SERPINH1">https://www.genecards.org/cgi-bin/carddisp.pl?gene=SERPINH1</a> |
| GYPB     | Glycophorin B (MNS Blood Group)                        | Protein Coding | 43 | GC04M143996 | 2.275601149 | <a href="https://www.genecards.org/cgi-bin/carddisp.pl?gene=GYPB">https://www.genecards.org/cgi-bin/carddisp.pl?gene=GYPB</a>         |
| WNT1     | Wnt Family Member 1                                    | Protein Coding | 52 | GC12P049566 | 2.275330067 | <a href="https://www.genecards.org/cgi-bin/carddisp.pl?gene=WNT1">https://www.genecards.org/cgi-bin/carddisp.pl?gene=WNT1</a>         |
| PTGER2   | Prostaglandin E Receptor 2                             | Protein Coding | 55 | GC14P052314 | 2.275265217 | <a href="https://www.genecards.org/cgi-bin/carddisp.pl?gene=PTGER2">https://www.genecards.org/cgi-bin/carddisp.pl?gene=PTGER2</a>     |
| JUNB     | JunB Proto-Oncogene, AP-1 Transcription Factor Subunit | Protein Coding | 48 | GC19P012791 | 2.274892807 | <a href="https://www.genecards.org/cgi-bin/carddisp.pl?gene=JUNB">https://www.genecards.org/cgi-bin/carddisp.pl?gene=JUNB</a>         |
| CTNND1   | Catenin Delta 1                                        | Protein Coding | 52 | GC11P058206 | 2.270763636 | <a href="https://www.genecards.org/cgi-bin/carddisp.pl?gene=CTNND1">https://www.genecards.org/cgi-bin/carddisp.pl?gene=CTNND1</a>     |
| VNN2     | Vanin 2                                                | Protein Coding | 48 | GC06M132743 | 2.269202709 | <a href="https://www.genecards.org/cgi-bin/carddisp.pl?gene=VNN2">https://www.genecards.org/cgi-bin/carddisp.pl?gene=VNN2</a>         |
| KAT2A    | Lysine Acetyltransferase 2A                            | Protein Coding | 55 | GC17M042113 | 2.268852472 | <a href="https://www.genecards.org/cgi-bin/carddisp.pl?gene=KAT2A">https://www.genecards.org/cgi-bin/carddisp.pl?gene=KAT2A</a>       |
| MST1R    | Macrophage Stimulating 1 Receptor                      | Protein Coding | 56 | GC03M051598 | 2.268038988 | <a href="https://www.genecards.org/cgi-bin/carddisp.pl?gene=MST1R">https://www.genecards.org/cgi-bin/carddisp.pl?gene=MST1R</a>       |
| SRF      | Serum Response Factor                                  | Protein Coding | 50 | GC06P043171 | 2.267645597 | <a href="https://www.genecards.org/cgi-bin/carddisp.pl?gene=SRF">https://www.genecards.org/cgi-bin/carddisp.pl?gene=SRF</a>           |
| GLCCI1   | Glucocorticoid Induced 1                               | Protein Coding | 43 | GC07P007974 | 2.263047218 | <a href="https://www.genecards.org/cgi-bin/carddisp.pl?gene=GLCCI1">https://www.genecards.org/cgi-bin/carddisp.pl?gene=GLCCI1</a>     |
| RPL3     | Ribosomal Protein L3                                   | Protein Coding | 48 | GC22M061482 | 2.262486219 | <a href="https://www.genecards.org/cgi-bin/carddisp.pl?gene=RPL3">https://www.genecards.org/cgi-bin/carddisp.pl?gene=RPL3</a>         |
| CHEK1    | Checkpoint Kinase 1                                    | Protein Coding | 56 | GC11P125625 | 2.262406826 | <a href="https://www.genecards.org/cgi-bin/carddisp.pl?gene=CHEK1">https://www.genecards.org/cgi-bin/carddisp.pl?gene=CHEK1</a>       |
| NPY2R    | Neuropeptide Y Receptor Y2                             | Protein Coding | 51 | GC04P155173 | 2.261928558 | <a href="https://www.genecards.org/cgi-bin/carddisp.pl?gene=NPY2R">https://www.genecards.org/cgi-bin/carddisp.pl?gene=NPY2R</a>       |
| SSTR2    | Somatostatin Receptor 2                                | Protein Coding | 53 | GC17P073165 | 2.258113146 | <a href="https://www.genecards.org/cgi-bin/carddisp.pl?gene=SSTR2">https://www.genecards.org/cgi-bin/carddisp.pl?gene=SSTR2</a>       |

|         |                                        |                |    |             |             |                                                                                                                                     |
|---------|----------------------------------------|----------------|----|-------------|-------------|-------------------------------------------------------------------------------------------------------------------------------------|
| EPX     | Eosinophil Peroxidase                  | Protein Coding | 50 | GC17P058192 | 2.257993698 | <a href="https://www.genecards.org/cgi-bin/carddisp.pl?gene=EPX">https://www.genecards.org/cgi-bin/carddisp.pl?gene=EPX</a>         |
| CALCR   | Calcitonin Receptor                    | Protein Coding | 55 | GC07M093424 | 2.256989479 | <a href="https://www.genecards.org/cgi-bin/carddisp.pl?gene=CALCR">https://www.genecards.org/cgi-bin/carddisp.pl?gene=CALCR</a>     |
| CD33    | CD33 Molecule                          | Protein Coding | 52 | GC19P073323 | 2.256884336 | <a href="https://www.genecards.org/cgi-bin/carddisp.pl?gene=CD33">https://www.genecards.org/cgi-bin/carddisp.pl?gene=CD33</a>       |
| PLA2G2D | Phospholipase A2 Group IID             | Protein Coding | 49 | GC01M020111 | 2.250037909 | <a href="https://www.genecards.org/cgi-bin/carddisp.pl?gene=PLA2G2D">https://www.genecards.org/cgi-bin/carddisp.pl?gene=PLA2G2D</a> |
| KRT4    | Keratin 4                              | Protein Coding | 48 | GC12M052806 | 2.247910023 | <a href="https://www.genecards.org/cgi-bin/carddisp.pl?gene=KRT4">https://www.genecards.org/cgi-bin/carddisp.pl?gene=KRT4</a>       |
| NCF2    | Neutrophil Cytosolic Factor 2          | Protein Coding | 54 | GC01M184057 | 2.243585348 | <a href="https://www.genecards.org/cgi-bin/carddisp.pl?gene=NCF2">https://www.genecards.org/cgi-bin/carddisp.pl?gene=NCF2</a>       |
| TRB     | T Cell Receptor Beta Locus             | Protein Coding | 25 | GC07P150792 | 2.242851019 | <a href="https://www.genecards.org/cgi-bin/carddisp.pl?gene=TRB">https://www.genecards.org/cgi-bin/carddisp.pl?gene=TRB</a>         |
| GRM2    | Glutamate Metabotropic Receptor 2      | Protein Coding | 52 | GC03P051707 | 2.236067772 | <a href="https://www.genecards.org/cgi-bin/carddisp.pl?gene=GRM2">https://www.genecards.org/cgi-bin/carddisp.pl?gene=GRM2</a>       |
| AXL     | AXL Receptor Tyrosine Kinase           | Protein Coding | 59 | GC19P041219 | 2.235015631 | <a href="https://www.genecards.org/cgi-bin/carddisp.pl?gene=AXL">https://www.genecards.org/cgi-bin/carddisp.pl?gene=AXL</a>         |
| FLT4    | Fms Related Receptor Tyrosine Kinase 4 | Protein Coding | 59 | GC05M180644 | 2.23460269  | <a href="https://www.genecards.org/cgi-bin/carddisp.pl?gene=FLT4">https://www.genecards.org/cgi-bin/carddisp.pl?gene=FLT4</a>       |
| RASA1   | RAS P21 Protein Activator 1            | Protein Coding | 52 | GC05P087267 | 2.232948542 | <a href="https://www.genecards.org/cgi-bin/carddisp.pl?gene=RASA1">https://www.genecards.org/cgi-bin/carddisp.pl?gene=RASA1</a>     |
| NOP2    | NOP2 Nucleolar Protein                 | Protein Coding | 44 | GC12M006556 | 2.232879877 | <a href="https://www.genecards.org/cgi-bin/carddisp.pl?gene=NOP2">https://www.genecards.org/cgi-bin/carddisp.pl?gene=NOP2</a>       |
| ANXA6   | Annexin A6                             | Protein Coding | 49 | GC05M151100 | 2.230432749 | <a href="https://www.genecards.org/cgi-bin/carddisp.pl?gene=ANXA6">https://www.genecards.org/cgi-bin/carddisp.pl?gene=ANXA6</a>     |
| CD14    | CD14 Molecule                          | Protein Coding | 53 | GC05M140631 | 2.229529858 | <a href="https://www.genecards.org/cgi-bin/carddisp.pl?gene=CD14">https://www.genecards.org/cgi-bin/carddisp.pl?gene=CD14</a>       |
| SLC18A1 | Solute Carrier Family 18 Member A1     | Protein Coding | 49 | GC08M020144 | 2.224712849 | <a href="https://www.genecards.org/cgi-bin/carddisp.pl?gene=SLC18A1">https://www.genecards.org/cgi-bin/carddisp.pl?gene=SLC18A1</a> |

|         |                                                  |                |    |             |             |                                                                                                                                     |
|---------|--------------------------------------------------|----------------|----|-------------|-------------|-------------------------------------------------------------------------------------------------------------------------------------|
| PCM1    | Pericentriolar Material 1                        | Protein Coding | 48 | GC08P017922 | 2.223807573 | <a href="https://www.genecards.org/cgi-bin/carddisp.pl?gene=PCM1">https://www.genecards.org/cgi-bin/carddisp.pl?gene=PCM1</a>       |
| TSLP    | Thymic Stromal Lymphopoietin                     | Protein Coding | 46 | GC05P111070 | 2.220189095 | <a href="https://www.genecards.org/cgi-bin/carddisp.pl?gene=TSLP">https://www.genecards.org/cgi-bin/carddisp.pl?gene=TSLP</a>       |
| ITGAV   | Integrin Subunit Alpha V                         | Protein Coding | 55 | GC02P186589 | 2.220042944 | <a href="https://www.genecards.org/cgi-bin/carddisp.pl?gene=ITGAV">https://www.genecards.org/cgi-bin/carddisp.pl?gene=ITGAV</a>     |
| CASP7   | Caspase 7                                        | Protein Coding | 56 | GC10P113679 | 2.215365887 | <a href="https://www.genecards.org/cgi-bin/carddisp.pl?gene=CASP7">https://www.genecards.org/cgi-bin/carddisp.pl?gene=CASP7</a>     |
| RRAS2   | RAS Related 2                                    | Protein Coding | 55 | GC11M014299 | 2.213180065 | <a href="https://www.genecards.org/cgi-bin/carddisp.pl?gene=RRAS2">https://www.genecards.org/cgi-bin/carddisp.pl?gene=RRAS2</a>     |
| CANT1   | Calcium Activated Nucleotidase 1                 | Protein Coding | 51 | GC17M078992 | 2.212469816 | <a href="https://www.genecards.org/cgi-bin/carddisp.pl?gene=CANT1">https://www.genecards.org/cgi-bin/carddisp.pl?gene=CANT1</a>     |
| FGF9    | Fibroblast Growth Factor 9                       | Protein Coding | 51 | GC13P021671 | 2.206700563 | <a href="https://www.genecards.org/cgi-bin/carddisp.pl?gene=FGF9">https://www.genecards.org/cgi-bin/carddisp.pl?gene=FGF9</a>       |
| NECTIN2 | Nectin Cell Adhesion Molecule 2                  | Protein Coding | 51 | GC19P073053 | 2.205529928 | <a href="https://www.genecards.org/cgi-bin/carddisp.pl?gene=NECTIN2">https://www.genecards.org/cgi-bin/carddisp.pl?gene=NECTIN2</a> |
| P2RY2   | Purinergic Receptor P2Y2                         | Protein Coding | 51 | GC11P073202 | 2.203983545 | <a href="https://www.genecards.org/cgi-bin/carddisp.pl?gene=P2RY2">https://www.genecards.org/cgi-bin/carddisp.pl?gene=P2RY2</a>     |
| SLC5A12 | Solute Carrier Family 5 Member 12                | Protein Coding | 43 | GC11M026648 | 2.202407837 | <a href="https://www.genecards.org/cgi-bin/carddisp.pl?gene=SLC5A12">https://www.genecards.org/cgi-bin/carddisp.pl?gene=SLC5A12</a> |
| MTA1    | Metastasis Associated 1                          | Protein Coding | 50 | GC14P105419 | 2.200025558 | <a href="https://www.genecards.org/cgi-bin/carddisp.pl?gene=MTA1">https://www.genecards.org/cgi-bin/carddisp.pl?gene=MTA1</a>       |
| CD247   | CD247 Molecule                                   | Protein Coding | 56 | GC01M167399 | 2.198839188 | <a href="https://www.genecards.org/cgi-bin/carddisp.pl?gene=CD247">https://www.genecards.org/cgi-bin/carddisp.pl?gene=CD247</a>     |
| CXCL1   | C-X-C Motif Chemokine Ligand 1                   | Protein Coding | 50 | GC04P073869 | 2.19849968  | <a href="https://www.genecards.org/cgi-bin/carddisp.pl?gene=CXCL1">https://www.genecards.org/cgi-bin/carddisp.pl?gene=CXCL1</a>     |
| AP2B1   | Adaptor Related Protein Complex 2 Subunit Beta 1 | Protein Coding | 49 | GC17P035578 | 2.197745085 | <a href="https://www.genecards.org/cgi-bin/carddisp.pl?gene=AP2B1">https://www.genecards.org/cgi-bin/carddisp.pl?gene=AP2B1</a>     |
| PALLD   | Palladin, Cytoskeletal Associated Protein        | Protein Coding | 49 | GC04P168497 | 2.195952415 | <a href="https://www.genecards.org/cgi-bin/carddisp.pl?gene=PALLD">https://www.genecards.org/cgi-bin/carddisp.pl?gene=PALLD</a>     |

|          |                                                              |                |    |             |             |                                                                                                                                       |
|----------|--------------------------------------------------------------|----------------|----|-------------|-------------|---------------------------------------------------------------------------------------------------------------------------------------|
| KCNJ6    | Potassium Inwardly Rectifying Channel Subfamily J Member 6   | Protein Coding | 53 | GC21M037607 | 2.194558859 | <a href="https://www.genecards.org/cgi-bin/carddisp.pl?gene=KCNJ6">https://www.genecards.org/cgi-bin/carddisp.pl?gene=KCNJ6</a>       |
| PXN      | Paxillin                                                     | Protein Coding | 52 | GC12M120210 | 2.194096565 | <a href="https://www.genecards.org/cgi-bin/carddisp.pl?gene=PXN">https://www.genecards.org/cgi-bin/carddisp.pl?gene=PXN</a>           |
| FGF1     | Fibroblast Growth Factor 1                                   | Protein Coding | 54 | GC05M142555 | 2.19223547  | <a href="https://www.genecards.org/cgi-bin/carddisp.pl?gene=FGF1">https://www.genecards.org/cgi-bin/carddisp.pl?gene=FGF1</a>         |
| TOR1A    | Torsin Family 1 Member A                                     | Protein Coding | 52 | GC09M129812 | 2.189523697 | <a href="https://www.genecards.org/cgi-bin/carddisp.pl?gene=TOR1A">https://www.genecards.org/cgi-bin/carddisp.pl?gene=TOR1A</a>       |
| IFNAR2   | Interferon Alpha And Beta Receptor Subunit 2                 | Protein Coding | 56 | GC21P033229 | 2.188015223 | <a href="https://www.genecards.org/cgi-bin/carddisp.pl?gene=IFNAR2">https://www.genecards.org/cgi-bin/carddisp.pl?gene=IFNAR2</a>     |
| LORICRIN | Loricrin Cornified Envelope Precursor Protein                | Protein Coding | 41 | GC01P153262 | 2.187447548 | <a href="https://www.genecards.org/cgi-bin/carddisp.pl?gene=LORICRIN">https://www.genecards.org/cgi-bin/carddisp.pl?gene=LORICRIN</a> |
| UGT2A1   | UDP Glucuronosyltransferase Family 2 Member A1 Complex Locus | Protein Coding | 39 | GC04M069588 | 2.187245607 | <a href="https://www.genecards.org/cgi-bin/carddisp.pl?gene=UGT2A1">https://www.genecards.org/cgi-bin/carddisp.pl?gene=UGT2A1</a>     |
| DNAJA3   | DnaJ Heat Shock Protein Family (Hsp40) Member A3             | Protein Coding | 47 | GC16P004425 | 2.186523199 | <a href="https://www.genecards.org/cgi-bin/carddisp.pl?gene=DNAJA3">https://www.genecards.org/cgi-bin/carddisp.pl?gene=DNAJA3</a>     |
| NPHP1    | Nephrocystin 1                                               | Protein Coding | 50 | GC02M110122 | 2.185429335 | <a href="https://www.genecards.org/cgi-bin/carddisp.pl?gene=NPHP1">https://www.genecards.org/cgi-bin/carddisp.pl?gene=NPHP1</a>       |
| ELK1     | ETS Transcription Factor ELK1                                | Protein Coding | 50 | GC0XM047635 | 2.183863878 | <a href="https://www.genecards.org/cgi-bin/carddisp.pl?gene=ELK1">https://www.genecards.org/cgi-bin/carddisp.pl?gene=ELK1</a>         |
| GAS6     | Growth Arrest Specific 6                                     | Protein Coding | 51 | GC13M113820 | 2.181773901 | <a href="https://www.genecards.org/cgi-bin/carddisp.pl?gene=GAS6">https://www.genecards.org/cgi-bin/carddisp.pl?gene=GAS6</a>         |
| RPL8     | Ribosomal Protein L8                                         | Protein Coding | 47 | GC08M145667 | 2.181601048 | <a href="https://www.genecards.org/cgi-bin/carddisp.pl?gene=RPL8">https://www.genecards.org/cgi-bin/carddisp.pl?gene=RPL8</a>         |
| NBAS     | NBAS Subunit Of NRZ Tethering Complex                        | Protein Coding | 47 | GC02M014791 | 2.18016696  | <a href="https://www.genecards.org/cgi-bin/carddisp.pl?gene=NBAS">https://www.genecards.org/cgi-bin/carddisp.pl?gene=NBAS</a>         |
| HARS2    | Histidyl-TRNA Synthetase 2, Mitochondrial                    | Protein Coding | 51 | GC05P146979 | 2.180040359 | <a href="https://www.genecards.org/cgi-bin/carddisp.pl?gene=HARS2">https://www.genecards.org/cgi-bin/carddisp.pl?gene=HARS2</a>       |
| TIAM1    | TIAM Rac1 Associated GEF 1                                   | Protein Coding | 51 | GC21M031118 | 2.179636002 | <a href="https://www.genecards.org/cgi-bin/carddisp.pl?gene=TIAM1">https://www.genecards.org/cgi-bin/carddisp.pl?gene=TIAM1</a>       |

|        |                                       |                |    |             |             |                                                                                                                                   |
|--------|---------------------------------------|----------------|----|-------------|-------------|-----------------------------------------------------------------------------------------------------------------------------------|
| TRAF2  | TNF Receptor Associated Factor 2      | Protein Coding | 51 | GC09P136881 | 2.178793192 | <a href="https://www.genecards.org/cgi-bin/carddisp.pl?gene=TRAF2">https://www.genecards.org/cgi-bin/carddisp.pl?gene=TRAF2</a>   |
| RCAN1  | Regulator Of Calcineurin 1            | Protein Coding | 49 | GC21M034513 | 2.1757195   | <a href="https://www.genecards.org/cgi-bin/carddisp.pl?gene=RCAN1">https://www.genecards.org/cgi-bin/carddisp.pl?gene=RCAN1</a>   |
| TUBG1  | Tubulin Gamma 1                       | Protein Coding | 53 | GC17P042609 | 2.174733877 | <a href="https://www.genecards.org/cgi-bin/carddisp.pl?gene=TUBG1">https://www.genecards.org/cgi-bin/carddisp.pl?gene=TUBG1</a>   |
| LAP3   | Leucine Aminopeptidase 3              | Protein Coding | 48 | GC04P019261 | 2.167632818 | <a href="https://www.genecards.org/cgi-bin/carddisp.pl?gene=LAP3">https://www.genecards.org/cgi-bin/carddisp.pl?gene=LAP3</a>     |
| MMP12  | Matrix Metallopeptidase 12            | Protein Coding | 53 | GC11M102862 | 2.162835836 | <a href="https://www.genecards.org/cgi-bin/carddisp.pl?gene=MMP12">https://www.genecards.org/cgi-bin/carddisp.pl?gene=MMP12</a>   |
| APEH   | Acylaminoacyl-Peptide Hydrolase       | Protein Coding | 47 | GC03P049673 | 2.162119865 | <a href="https://www.genecards.org/cgi-bin/carddisp.pl?gene=APEH">https://www.genecards.org/cgi-bin/carddisp.pl?gene=APEH</a>     |
| MOGAT3 | Monoacylglycerol O-Acyltransferase 3  | Protein Coding | 38 | GC07M101192 | 2.160770655 | <a href="https://www.genecards.org/cgi-bin/carddisp.pl?gene=MOGAT3">https://www.genecards.org/cgi-bin/carddisp.pl?gene=MOGAT3</a> |
| POU2F2 | POU Class 2 Homeobox 2                | Protein Coding | 48 | GC19M042086 | 2.157357693 | <a href="https://www.genecards.org/cgi-bin/carddisp.pl?gene=POU2F2">https://www.genecards.org/cgi-bin/carddisp.pl?gene=POU2F2</a> |
| KDM4A  | Lysine Demethylase 4A                 | Protein Coding | 51 | GC01P043650 | 2.156814098 | <a href="https://www.genecards.org/cgi-bin/carddisp.pl?gene=KDM4A">https://www.genecards.org/cgi-bin/carddisp.pl?gene=KDM4A</a>   |
| CD86   | CD86 Molecule                         | Protein Coding | 51 | GC03P122055 | 2.156406641 | <a href="https://www.genecards.org/cgi-bin/carddisp.pl?gene=CD86">https://www.genecards.org/cgi-bin/carddisp.pl?gene=CD86</a>     |
| GRPR   | Gastrin Releasing Peptide Receptor    | Protein Coding | 50 | GC0XP016141 | 2.155606985 | <a href="https://www.genecards.org/cgi-bin/carddisp.pl?gene=GRPR">https://www.genecards.org/cgi-bin/carddisp.pl?gene=GRPR</a>     |
| CHRM2  | Cholinergic Receptor Muscarinic 2     | Protein Coding | 55 | GC07P136868 | 2.15210104  | <a href="https://www.genecards.org/cgi-bin/carddisp.pl?gene=CHRM2">https://www.genecards.org/cgi-bin/carddisp.pl?gene=CHRM2</a>   |
| MSRB1  | Methionine Sulfoxide Reductase B1     | Protein Coding | 45 | GC16M008078 | 2.151757956 | <a href="https://www.genecards.org/cgi-bin/carddisp.pl?gene=MSRB1">https://www.genecards.org/cgi-bin/carddisp.pl?gene=MSRB1</a>   |
| SSBP1  | Single Stranded DNA Binding Protein 1 | Protein Coding | 47 | GC07P150787 | 2.150444269 | <a href="https://www.genecards.org/cgi-bin/carddisp.pl?gene=SSBP1">https://www.genecards.org/cgi-bin/carddisp.pl?gene=SSBP1</a>   |
| CXCL5  | C-X-C Motif Chemokine Ligand 5        | Protein Coding | 47 | GC04M073995 | 2.147365332 | <a href="https://www.genecards.org/cgi-bin/carddisp.pl?gene=CXCL5">https://www.genecards.org/cgi-bin/carddisp.pl?gene=CXCL5</a>   |

|        |                                               |                |    |             |             |                                                                                                                                   |
|--------|-----------------------------------------------|----------------|----|-------------|-------------|-----------------------------------------------------------------------------------------------------------------------------------|
| PPP3CA | Protein Phosphatase 3 Catalytic Subunit Alpha | Protein Coding | 59 | GC04M101024 | 2.147106171 | <a href="https://www.genecards.org/cgi-bin/carddisp.pl?gene=PPP3CA">https://www.genecards.org/cgi-bin/carddisp.pl?gene=PPP3CA</a> |
| GUCA2B | Guanylate Cyclase Activator 2B                | Protein Coding | 44 | GC01P042153 | 2.145024538 | <a href="https://www.genecards.org/cgi-bin/carddisp.pl?gene=GUCA2B">https://www.genecards.org/cgi-bin/carddisp.pl?gene=GUCA2B</a> |
| MIP    | Major Intrinsic Protein Of Lens Fiber         | Protein Coding | 47 | GC12M056449 | 2.14080596  | <a href="https://www.genecards.org/cgi-bin/carddisp.pl?gene=MIP">https://www.genecards.org/cgi-bin/carddisp.pl?gene=MIP</a>       |
| GPR139 | G Protein-Coupled Receptor 139                | Protein Coding | 41 | GC16M020042 | 2.138799429 | <a href="https://www.genecards.org/cgi-bin/carddisp.pl?gene=GPR139">https://www.genecards.org/cgi-bin/carddisp.pl?gene=GPR139</a> |
| COX4I2 | Cytochrome C Oxidase Subunit 4I2              | Protein Coding | 47 | GC20P031637 | 2.136496305 | <a href="https://www.genecards.org/cgi-bin/carddisp.pl?gene=COX4I2">https://www.genecards.org/cgi-bin/carddisp.pl?gene=COX4I2</a> |
| ITGA4  | Integrin Subunit Alpha 4                      | Protein Coding | 55 | GC02P181456 | 2.135978699 | <a href="https://www.genecards.org/cgi-bin/carddisp.pl?gene=ITGA4">https://www.genecards.org/cgi-bin/carddisp.pl?gene=ITGA4</a>   |
| SLC5A3 | Solute Carrier Family 5 Member 3              | Protein Coding | 46 | GC21P034139 | 2.13568759  | <a href="https://www.genecards.org/cgi-bin/carddisp.pl?gene=SLC5A3">https://www.genecards.org/cgi-bin/carddisp.pl?gene=SLC5A3</a> |
| CXCL9  | C-X-C Motif Chemokine Ligand 9                | Protein Coding | 47 | GC04M076001 | 2.134976625 | <a href="https://www.genecards.org/cgi-bin/carddisp.pl?gene=CXCL9">https://www.genecards.org/cgi-bin/carddisp.pl?gene=CXCL9</a>   |
| EEF2K  | Eukaryotic Elongation Factor 2 Kinase         | Protein Coding | 53 | GC16P024508 | 2.13412714  | <a href="https://www.genecards.org/cgi-bin/carddisp.pl?gene=EEF2K">https://www.genecards.org/cgi-bin/carddisp.pl?gene=EEF2K</a>   |
| MMP7   | Matrix Metalloproteinase 7                    | Protein Coding | 53 | GC11M102425 | 2.130843878 | <a href="https://www.genecards.org/cgi-bin/carddisp.pl?gene=MMP7">https://www.genecards.org/cgi-bin/carddisp.pl?gene=MMP7</a>     |
| KAT2B  | Lysine Acetyltransferase 2B                   | Protein Coding | 55 | GC03P020043 | 2.130774498 | <a href="https://www.genecards.org/cgi-bin/carddisp.pl?gene=KAT2B">https://www.genecards.org/cgi-bin/carddisp.pl?gene=KAT2B</a>   |
| CDC25C | Cell Division Cycle 25C                       | Protein Coding | 54 | GC05M138285 | 2.12878871  | <a href="https://www.genecards.org/cgi-bin/carddisp.pl?gene=CDC25C">https://www.genecards.org/cgi-bin/carddisp.pl?gene=CDC25C</a> |
| UTRN   | Utrophin                                      | Protein Coding | 47 | GC06P144285 | 2.123741865 | <a href="https://www.genecards.org/cgi-bin/carddisp.pl?gene=UTRN">https://www.genecards.org/cgi-bin/carddisp.pl?gene=UTRN</a>     |
| TYRO3  | TYRO3 Protein Tyrosine Kinase                 | Protein Coding | 56 | GC15P041557 | 2.121773958 | <a href="https://www.genecards.org/cgi-bin/carddisp.pl?gene=TYRO3">https://www.genecards.org/cgi-bin/carddisp.pl?gene=TYRO3</a>   |
| MAP2K3 | Mitogen-Activated Protein Kinase Kinase 3     | Protein Coding | 55 | GC17P061212 | 2.121331215 | <a href="https://www.genecards.org/cgi-bin/carddisp.pl?gene=MAP2K3">https://www.genecards.org/cgi-bin/carddisp.pl?gene=MAP2K3</a> |



|        |                                               |                |    |             |             |                                                                                                                                   |
|--------|-----------------------------------------------|----------------|----|-------------|-------------|-----------------------------------------------------------------------------------------------------------------------------------|
| DPYSL2 | Dihydropyrimidinase Like 2                    | Protein Coding | 52 | GC08P026514 | 2.119753838 | <a href="https://www.genecards.org/cgi-bin/carddisp.pl?gene=DPYSL2">https://www.genecards.org/cgi-bin/carddisp.pl?gene=DPYSL2</a> |
| HDAC5  | Histone Deacetylase 5                         | Protein Coding | 56 | GC17M044076 | 2.118413448 | <a href="https://www.genecards.org/cgi-bin/carddisp.pl?gene=HDAC5">https://www.genecards.org/cgi-bin/carddisp.pl?gene=HDAC5</a>   |
| TPST2  | Tyrosylprotein Sulfotransferase 2             | Protein Coding | 47 | GC22M061183 | 2.113404989 | <a href="https://www.genecards.org/cgi-bin/carddisp.pl?gene=TPST2">https://www.genecards.org/cgi-bin/carddisp.pl?gene=TPST2</a>   |
| MERTK  | MER Proto-Oncogene, Tyrosine Kinase           | Protein Coding | 59 | GC02P111898 | 2.112577915 | <a href="https://www.genecards.org/cgi-bin/carddisp.pl?gene=MERTK">https://www.genecards.org/cgi-bin/carddisp.pl?gene=MERTK</a>   |
| NGB    | Neuroglobin                                   | Protein Coding | 43 | GC14M077265 | 2.111859798 | <a href="https://www.genecards.org/cgi-bin/carddisp.pl?gene=NGB">https://www.genecards.org/cgi-bin/carddisp.pl?gene=NGB</a>       |
| PTP4A1 | Protein Tyrosine Phosphatase 4A1              | Protein Coding | 47 | GC06P092552 | 2.11169529  | <a href="https://www.genecards.org/cgi-bin/carddisp.pl?gene=PTP4A1">https://www.genecards.org/cgi-bin/carddisp.pl?gene=PTP4A1</a> |
| GIT2   | GIT ArfGAP 2                                  | Protein Coding | 48 | GC12M109929 | 2.111174107 | <a href="https://www.genecards.org/cgi-bin/carddisp.pl?gene=GIT2">https://www.genecards.org/cgi-bin/carddisp.pl?gene=GIT2</a>     |
| SH2D1A | SH2 Domain Containing 1A                      | Protein Coding | 53 | GC0XP124227 | 2.110352278 | <a href="https://www.genecards.org/cgi-bin/carddisp.pl?gene=SH2D1A">https://www.genecards.org/cgi-bin/carddisp.pl?gene=SH2D1A</a> |
| SORBS1 | Sorbin And SH3 Domain Containing 1            | Protein Coding | 48 | GC10M095311 | 2.107699394 | <a href="https://www.genecards.org/cgi-bin/carddisp.pl?gene=SORBS1">https://www.genecards.org/cgi-bin/carddisp.pl?gene=SORBS1</a> |
| NR2E3  | Nuclear Receptor Subfamily 2 Group E Member 3 | Protein Coding | 48 | GC15P071792 | 2.107695341 | <a href="https://www.genecards.org/cgi-bin/carddisp.pl?gene=NR2E3">https://www.genecards.org/cgi-bin/carddisp.pl?gene=NR2E3</a>   |
| RNPC3  | RNA Binding Region (RNP1, RRM) Containing 3   | Protein Coding | 42 | GC01P103525 | 2.104146481 | <a href="https://www.genecards.org/cgi-bin/carddisp.pl?gene=RNPC3">https://www.genecards.org/cgi-bin/carddisp.pl?gene=RNPC3</a>   |
| PPT2   | Palmitoyl-Protein Thioesterase 2              | Protein Coding | 44 | GC06P032153 | 2.102693081 | <a href="https://www.genecards.org/cgi-bin/carddisp.pl?gene=PPT2">https://www.genecards.org/cgi-bin/carddisp.pl?gene=PPT2</a>     |
| EPHA3  | EPH Receptor A3                               | Protein Coding | 53 | GC03P089077 | 2.101714849 | <a href="https://www.genecards.org/cgi-bin/carddisp.pl?gene=EPHA3">https://www.genecards.org/cgi-bin/carddisp.pl?gene=EPHA3</a>   |
| CD69   | CD69 Molecule                                 | Protein Coding | 49 | GC12M022623 | 2.100873947 | <a href="https://www.genecards.org/cgi-bin/carddisp.pl?gene=CD69">https://www.genecards.org/cgi-bin/carddisp.pl?gene=CD69</a>     |
| NTRK3  | Neurotrophic Receptor Tyrosine Kinase 3       | Protein Coding | 59 | GC15M087859 | 2.100211382 | <a href="https://www.genecards.org/cgi-bin/carddisp.pl?gene=NTRK3">https://www.genecards.org/cgi-bin/carddisp.pl?gene=NTRK3</a>   |

|         |                                                    |                |    |             |             |                                                                                                                                     |
|---------|----------------------------------------------------|----------------|----|-------------|-------------|-------------------------------------------------------------------------------------------------------------------------------------|
| ARHGEF2 | Rho/Rac Guanine Nucleotide Exchange Factor 2       | Protein Coding | 52 | GC01M155946 | 2.094944477 | <a href="https://www.genecards.org/cgi-bin/carddisp.pl?gene=ARHGEF2">https://www.genecards.org/cgi-bin/carddisp.pl?gene=ARHGEF2</a> |
| TNFRSF9 | TNF Receptor Superfamily Member 9                  | Protein Coding | 50 | GC01M007915 | 2.094399691 | <a href="https://www.genecards.org/cgi-bin/carddisp.pl?gene=TNFRSF9">https://www.genecards.org/cgi-bin/carddisp.pl?gene=TNFRSF9</a> |
| BID     | BH3 Interacting Domain Death Agonist               | Protein Coding | 52 | GC22M017734 | 2.09288168  | <a href="https://www.genecards.org/cgi-bin/carddisp.pl?gene=BID">https://www.genecards.org/cgi-bin/carddisp.pl?gene=BID</a>         |
| RRAS    | RAS Related                                        | Protein Coding | 48 | GC19M049635 | 2.091985941 | <a href="https://www.genecards.org/cgi-bin/carddisp.pl?gene=RRAS">https://www.genecards.org/cgi-bin/carddisp.pl?gene=RRAS</a>       |
| ITGA6   | Integrin Subunit Alpha 6                           | Protein Coding | 56 | GC02P172427 | 2.089226961 | <a href="https://www.genecards.org/cgi-bin/carddisp.pl?gene=ITGA6">https://www.genecards.org/cgi-bin/carddisp.pl?gene=ITGA6</a>     |
| MTPN    | Myotrophin                                         | Protein Coding | 41 | GC07M135926 | 2.08886981  | <a href="https://www.genecards.org/cgi-bin/carddisp.pl?gene=MTPN">https://www.genecards.org/cgi-bin/carddisp.pl?gene=MTPN</a>       |
| HCK     | HCK Proto-Oncogene, Src Family Tyrosine Kinase     | Protein Coding | 54 | GC20P032052 | 2.088297129 | <a href="https://www.genecards.org/cgi-bin/carddisp.pl?gene=HCK">https://www.genecards.org/cgi-bin/carddisp.pl?gene=HCK</a>         |
| FKBP1A  | FKBP Prolyl Isomerase 1A                           | Protein Coding | 54 | GC20M001369 | 2.087401867 | <a href="https://www.genecards.org/cgi-bin/carddisp.pl?gene=FKBP1A">https://www.genecards.org/cgi-bin/carddisp.pl?gene=FKBP1A</a>   |
| SLC18A3 | Solute Carrier Family 18 Member A3                 | Protein Coding | 50 | GC10P049610 | 2.086946011 | <a href="https://www.genecards.org/cgi-bin/carddisp.pl?gene=SLC18A3">https://www.genecards.org/cgi-bin/carddisp.pl?gene=SLC18A3</a> |
| ADI1    | Acireductone Dioxygenase 1                         | Protein Coding | 46 | GC02M003501 | 2.086838961 | <a href="https://www.genecards.org/cgi-bin/carddisp.pl?gene=ADI1">https://www.genecards.org/cgi-bin/carddisp.pl?gene=ADI1</a>       |
| COL4A1  | Collagen Type IV Alpha 1 Chain                     | Protein Coding | 55 | GC13M110148 | 2.084783077 | <a href="https://www.genecards.org/cgi-bin/carddisp.pl?gene=COL4A1">https://www.genecards.org/cgi-bin/carddisp.pl?gene=COL4A1</a>   |
| MASP1   | MBL Associated Serine Protease 1                   | Protein Coding | 55 | GC03M187216 | 2.084374428 | <a href="https://www.genecards.org/cgi-bin/carddisp.pl?gene=MASP1">https://www.genecards.org/cgi-bin/carddisp.pl?gene=MASP1</a>     |
| ADORA2B | Adenosine A2b Receptor                             | Protein Coding | 55 | GC17P017963 | 2.084364653 | <a href="https://www.genecards.org/cgi-bin/carddisp.pl?gene=ADORA2B">https://www.genecards.org/cgi-bin/carddisp.pl?gene=ADORA2B</a> |
| DLG2    | Discs Large MAGUK Scaffold Protein 2               | Protein Coding | 48 | GC11M083455 | 2.081746817 | <a href="https://www.genecards.org/cgi-bin/carddisp.pl?gene=DLG2">https://www.genecards.org/cgi-bin/carddisp.pl?gene=DLG2</a>       |
| PRG2    | Proteoglycan 2, Pro Eosinophil Major Basic Protein | Protein Coding | 47 | GC11M057386 | 2.079038382 | <a href="https://www.genecards.org/cgi-bin/carddisp.pl?gene=PRG2">https://www.genecards.org/cgi-bin/carddisp.pl?gene=PRG2</a>       |

|          |                                                                       |                |    |             |             |                                                                                                                                       |
|----------|-----------------------------------------------------------------------|----------------|----|-------------|-------------|---------------------------------------------------------------------------------------------------------------------------------------|
| KHDRBS2  | KH RNA Binding Domain Containing, Signal Transduction Associated<br>2 | Protein Coding | 43 | GC06M061542 | 2.074846268 | <a href="https://www.genecards.org/cgi-bin/carddisp.pl?gene=KHDRBS2">https://www.genecards.org/cgi-bin/carddisp.pl?gene=KHDRBS2</a>   |
| FOXP2    | Forkhead Box P2                                                       | Protein Coding | 50 | GC07P114086 | 2.072494745 | <a href="https://www.genecards.org/cgi-bin/carddisp.pl?gene=FOXP2">https://www.genecards.org/cgi-bin/carddisp.pl?gene=FOXP2</a>       |
| POLK     | DNA Polymerase Kappa                                                  | Protein Coding | 49 | GC05P075511 | 2.071971893 | <a href="https://www.genecards.org/cgi-bin/carddisp.pl?gene=POLK">https://www.genecards.org/cgi-bin/carddisp.pl?gene=POLK</a>         |
| FCGR1A   | Fc Gamma Receptor Ia                                                  | Protein Coding | 48 | GC01P150388 | 2.06972146  | <a href="https://www.genecards.org/cgi-bin/carddisp.pl?gene=FCGR1A">https://www.genecards.org/cgi-bin/carddisp.pl?gene=FCGR1A</a>     |
| RPL23A   | Ribosomal Protein L23a                                                | Protein Coding | 47 | GC17P028719 | 2.064439297 | <a href="https://www.genecards.org/cgi-bin/carddisp.pl?gene=RPL23A">https://www.genecards.org/cgi-bin/carddisp.pl?gene=RPL23A</a>     |
| ATN1     | Atrophin 1                                                            | Protein Coding | 50 | GC12P023561 | 2.062030077 | <a href="https://www.genecards.org/cgi-bin/carddisp.pl?gene=ATN1">https://www.genecards.org/cgi-bin/carddisp.pl?gene=ATN1</a>         |
| SFTPA1   | Surfactant Protein A1                                                 | Protein Coding | 51 | GC10P095475 | 2.061035395 | <a href="https://www.genecards.org/cgi-bin/carddisp.pl?gene=SFTPA1">https://www.genecards.org/cgi-bin/carddisp.pl?gene=SFTPA1</a>     |
| CSF3R    | Colony Stimulating Factor 3 Receptor                                  | Protein Coding | 54 | GC01M036466 | 2.059127331 | <a href="https://www.genecards.org/cgi-bin/carddisp.pl?gene=CSF3R">https://www.genecards.org/cgi-bin/carddisp.pl?gene=CSF3R</a>       |
| MYO18A   | Myosin XVIIIa                                                         | Protein Coding | 44 | GC17M051199 | 2.057760477 | <a href="https://www.genecards.org/cgi-bin/carddisp.pl?gene=MYO18A">https://www.genecards.org/cgi-bin/carddisp.pl?gene=MYO18A</a>     |
| GP6      | Glycoprotein VI Platelet                                              | Protein Coding | 53 | GC19M055013 | 2.057397366 | <a href="https://www.genecards.org/cgi-bin/carddisp.pl?gene=GP6">https://www.genecards.org/cgi-bin/carddisp.pl?gene=GP6</a>           |
| HUWE1    | HECT, UBA And WWE Domain Containing E3 Ubiquitin Protein<br>Ligase 1  | Protein Coding | 52 | GC0XM053532 | 2.05684495  | <a href="https://www.genecards.org/cgi-bin/carddisp.pl?gene=HUWE1">https://www.genecards.org/cgi-bin/carddisp.pl?gene=HUWE1</a>       |
| SLC9A3R2 | SLC9A3 Regulator 2                                                    | Protein Coding | 45 | GC16P013511 | 2.05680871  | <a href="https://www.genecards.org/cgi-bin/carddisp.pl?gene=SLC9A3R2">https://www.genecards.org/cgi-bin/carddisp.pl?gene=SLC9A3R2</a> |
| NUDT1    | Nudix Hydrolase 1                                                     | Protein Coding | 48 | GC07P002242 | 2.056804657 | <a href="https://www.genecards.org/cgi-bin/carddisp.pl?gene=NUDT1">https://www.genecards.org/cgi-bin/carddisp.pl?gene=NUDT1</a>       |
| CCL3     | C-C Motif Chemokine Ligand 3                                          | Protein Coding | 46 | GC17M036088 | 2.054622173 | <a href="https://www.genecards.org/cgi-bin/carddisp.pl?gene=CCL3">https://www.genecards.org/cgi-bin/carddisp.pl?gene=CCL3</a>         |
| PSIP1    | PC4 And SRSF1 Interacting Protein 1                                   | Protein Coding | 47 | GC09M015464 | 2.052438974 | <a href="https://www.genecards.org/cgi-bin/carddisp.pl?gene=PSIP1">https://www.genecards.org/cgi-bin/carddisp.pl?gene=PSIP1</a>       |

|          |                                                                 |                |    |             |             |                                                                                                                                       |
|----------|-----------------------------------------------------------------|----------------|----|-------------|-------------|---------------------------------------------------------------------------------------------------------------------------------------|
| LMO2     | LIM Domain Only 2                                               | Protein Coding | 47 | GC11M033858 | 2.05214572  | <a href="https://www.genecards.org/cgi-bin/carddisp.pl?gene=LMO2">https://www.genecards.org/cgi-bin/carddisp.pl?gene=LMO2</a>         |
| PTPRF    | Protein Tyrosine Phosphatase Receptor Type F                    | Protein Coding | 56 | GC01P043527 | 2.049630642 | <a href="https://www.genecards.org/cgi-bin/carddisp.pl?gene=PTPRF">https://www.genecards.org/cgi-bin/carddisp.pl?gene=PTPRF</a>       |
| VEGFB    | Vascular Endothelial Growth Factor B                            | Protein Coding | 51 | GC11P064234 | 2.048155546 | <a href="https://www.genecards.org/cgi-bin/carddisp.pl?gene=VEGFB">https://www.genecards.org/cgi-bin/carddisp.pl?gene=VEGFB</a>       |
| CPA1     | Carboxypeptidase A1                                             | Protein Coding | 51 | GC07P130380 | 2.048068523 | <a href="https://www.genecards.org/cgi-bin/carddisp.pl?gene=CPA1">https://www.genecards.org/cgi-bin/carddisp.pl?gene=CPA1</a>         |
| SNAI2    | Snail Family Transcriptional Repressor 2                        | Protein Coding | 51 | GC08M048917 | 2.047676325 | <a href="https://www.genecards.org/cgi-bin/carddisp.pl?gene=SNAI2">https://www.genecards.org/cgi-bin/carddisp.pl?gene=SNAI2</a>       |
| CEACAM1  | CEA Cell Adhesion Molecule 1                                    | Protein Coding | 51 | GC19M042507 | 2.047606945 | <a href="https://www.genecards.org/cgi-bin/carddisp.pl?gene=CEACAM1">https://www.genecards.org/cgi-bin/carddisp.pl?gene=CEACAM1</a>   |
| TPST1    | Tyrosylprotein Sulfotransferase 1                               | Protein Coding | 47 | GC07P071715 | 2.046896458 | <a href="https://www.genecards.org/cgi-bin/carddisp.pl?gene=TPST1">https://www.genecards.org/cgi-bin/carddisp.pl?gene=TPST1</a>       |
| C3AR1    | Complement C3a Receptor 1                                       | Protein Coding | 50 | GC12M008059 | 2.04667449  | <a href="https://www.genecards.org/cgi-bin/carddisp.pl?gene=C3AR1">https://www.genecards.org/cgi-bin/carddisp.pl?gene=C3AR1</a>       |
| EIF6     | Eukaryotic Translation Initiation Factor 6                      | Protein Coding | 47 | GC20M035278 | 2.044235945 | <a href="https://www.genecards.org/cgi-bin/carddisp.pl?gene=EIF6">https://www.genecards.org/cgi-bin/carddisp.pl?gene=EIF6</a>         |
| SUMO1    | Small Ubiquitin Like Modifier 1                                 | Protein Coding | 53 | GC02M202206 | 2.042767763 | <a href="https://www.genecards.org/cgi-bin/carddisp.pl?gene=SUMO1">https://www.genecards.org/cgi-bin/carddisp.pl?gene=SUMO1</a>       |
| TIE1     | Tyrosine Kinase With Immunoglobulin Like And EGF Like Domains 1 | Protein Coding | 52 | GC01P043300 | 2.041883707 | <a href="https://www.genecards.org/cgi-bin/carddisp.pl?gene=TIE1">https://www.genecards.org/cgi-bin/carddisp.pl?gene=TIE1</a>         |
| CENPF    | Centromere Protein F                                            | Protein Coding | 48 | GC01P214603 | 2.041686535 | <a href="https://www.genecards.org/cgi-bin/carddisp.pl?gene=CENPF">https://www.genecards.org/cgi-bin/carddisp.pl?gene=CENPF</a>       |
| TNC      | Tenascin C                                                      | Protein Coding | 56 | GC09M115019 | 2.041381836 | <a href="https://www.genecards.org/cgi-bin/carddisp.pl?gene=TNC">https://www.genecards.org/cgi-bin/carddisp.pl?gene=TNC</a>           |
| SERPINB2 | Serpin Family B Member 2                                        | Protein Coding | 50 | GC18P063871 | 2.040825367 | <a href="https://www.genecards.org/cgi-bin/carddisp.pl?gene=SERPINB2">https://www.genecards.org/cgi-bin/carddisp.pl?gene=SERPINB2</a> |
| SLC47A1  | Solute Carrier Family 47 Member 1                               | Protein Coding | 48 | GC17P019495 | 2.040024042 | <a href="https://www.genecards.org/cgi-bin/carddisp.pl?gene=SLC47A1">https://www.genecards.org/cgi-bin/carddisp.pl?gene=SLC47A1</a>   |

|        |                                            |                |    |             |             |                                                                                                                                   |
|--------|--------------------------------------------|----------------|----|-------------|-------------|-----------------------------------------------------------------------------------------------------------------------------------|
| MCAM   | Melanoma Cell Adhesion Molecule            | Protein Coding | 49 | GC11M119308 | 2.03592515  | <a href="https://www.genecards.org/cgi-bin/carddisp.pl?gene=MCAM">https://www.genecards.org/cgi-bin/carddisp.pl?gene=MCAM</a>     |
| G3BP1  | G3BP Stress Granule Assembly Factor 1      | Protein Coding | 47 | GC05P151771 | 2.033505201 | <a href="https://www.genecards.org/cgi-bin/carddisp.pl?gene=G3BP1">https://www.genecards.org/cgi-bin/carddisp.pl?gene=G3BP1</a>   |
| OPRD1  | Opioid Receptor Delta 1                    | Protein Coding | 50 | GC01P028812 | 2.032579899 | <a href="https://www.genecards.org/cgi-bin/carddisp.pl?gene=OPRD1">https://www.genecards.org/cgi-bin/carddisp.pl?gene=OPRD1</a>   |
| KRT10  | Keratin 10                                 | Protein Coding | 50 | GC17M040818 | 2.029624939 | <a href="https://www.genecards.org/cgi-bin/carddisp.pl?gene=KRT10">https://www.genecards.org/cgi-bin/carddisp.pl?gene=KRT10</a>   |
| DNM3   | Dynamin 3                                  | Protein Coding | 50 | GC01P171868 | 2.028045177 | <a href="https://www.genecards.org/cgi-bin/carddisp.pl?gene=DNM3">https://www.genecards.org/cgi-bin/carddisp.pl?gene=DNM3</a>     |
| NOG    | Noggin                                     | Protein Coding | 53 | GC17P056593 | 2.026612282 | <a href="https://www.genecards.org/cgi-bin/carddisp.pl?gene=NOG">https://www.genecards.org/cgi-bin/carddisp.pl?gene=NOG</a>       |
| HIP1   | Huntingtin Interacting Protein 1           | Protein Coding | 47 | GC07M075533 | 2.025650978 | <a href="https://www.genecards.org/cgi-bin/carddisp.pl?gene=HIP1">https://www.genecards.org/cgi-bin/carddisp.pl?gene=HIP1</a>     |
| DMPK   | DM1 Protein Kinase                         | Protein Coding | 55 | GC19M045769 | 2.02176404  | <a href="https://www.genecards.org/cgi-bin/carddisp.pl?gene=DMPK">https://www.genecards.org/cgi-bin/carddisp.pl?gene=DMPK</a>     |
| MUSK   | Muscle Associated Receptor Tyrosine Kinase | Protein Coding | 55 | GC09P110668 | 2.02113533  | <a href="https://www.genecards.org/cgi-bin/carddisp.pl?gene=MUSK">https://www.genecards.org/cgi-bin/carddisp.pl?gene=MUSK</a>     |
| USP1   | Ubiquitin Specific Peptidase 1             | Protein Coding | 51 | GC01P062436 | 2.019223452 | <a href="https://www.genecards.org/cgi-bin/carddisp.pl?gene=USP1">https://www.genecards.org/cgi-bin/carddisp.pl?gene=USP1</a>     |
| CCNG1  | Cyclin G1                                  | Protein Coding | 47 | GC05P163438 | 2.017747879 | <a href="https://www.genecards.org/cgi-bin/carddisp.pl?gene=CCNG1">https://www.genecards.org/cgi-bin/carddisp.pl?gene=CCNG1</a>   |
| BLZF1  | Basic Leucine Zipper Nuclear Factor 1      | Protein Coding | 45 | GC01P169367 | 2.013850212 | <a href="https://www.genecards.org/cgi-bin/carddisp.pl?gene=BLZF1">https://www.genecards.org/cgi-bin/carddisp.pl?gene=BLZF1</a>   |
| MYOD1  | Myogenic Differentiation 1                 | Protein Coding | 53 | GC11P017741 | 2.008466005 | <a href="https://www.genecards.org/cgi-bin/carddisp.pl?gene=MYOD1">https://www.genecards.org/cgi-bin/carddisp.pl?gene=MYOD1</a>   |
| SLX9   | SLX9 Ribosome Biogenesis Factor            | Protein Coding | 35 | GC21P044939 | 2.005723715 | <a href="https://www.genecards.org/cgi-bin/carddisp.pl?gene=SLX9">https://www.genecards.org/cgi-bin/carddisp.pl?gene=SLX9</a>     |
| LGALS4 | Galectin 4                                 | Protein Coding | 44 | GC19M070551 | 2.00537014  | <a href="https://www.genecards.org/cgi-bin/carddisp.pl?gene=LGALS4">https://www.genecards.org/cgi-bin/carddisp.pl?gene=LGALS4</a> |

|         |                                                 |                |    |             |             |                                                                                                                                     |
|---------|-------------------------------------------------|----------------|----|-------------|-------------|-------------------------------------------------------------------------------------------------------------------------------------|
| ZBTB16  | Zinc Finger And BTB Domain Containing 16        | Protein Coding | 50 | GC11P114059 | 2.005048513 | <a href="https://www.genecards.org/cgi-bin/carddisp.pl?gene=ZBTB16">https://www.genecards.org/cgi-bin/carddisp.pl?gene=ZBTB16</a>   |
| PIGR    | Polymeric Immunoglobulin Receptor               | Protein Coding | 48 | GC01M206928 | 2.003614426 | <a href="https://www.genecards.org/cgi-bin/carddisp.pl?gene=PIGR">https://www.genecards.org/cgi-bin/carddisp.pl?gene=PIGR</a>       |
| ROR2    | Receptor Tyrosine Kinase Like Orphan Receptor 2 | Protein Coding | 55 | GC09M096500 | 1.999219894 | <a href="https://www.genecards.org/cgi-bin/carddisp.pl?gene=ROR2">https://www.genecards.org/cgi-bin/carddisp.pl?gene=ROR2</a>       |
| CA7     | Carbonic Anhydrase 7                            | Protein Coding | 44 | GC16P066844 | 1.998595476 | <a href="https://www.genecards.org/cgi-bin/carddisp.pl?gene=CA7">https://www.genecards.org/cgi-bin/carddisp.pl?gene=CA7</a>         |
| IFNGR1  | Interferon Gamma Receptor 1                     | Protein Coding | 57 | GC06M137197 | 1.997519255 | <a href="https://www.genecards.org/cgi-bin/carddisp.pl?gene=IFNGR1">https://www.genecards.org/cgi-bin/carddisp.pl?gene=IFNGR1</a>   |
| CCL7    | C-C Motif Chemokine Ligand 7                    | Protein Coding | 50 | GC17P034270 | 1.996502876 | <a href="https://www.genecards.org/cgi-bin/carddisp.pl?gene=CCL7">https://www.genecards.org/cgi-bin/carddisp.pl?gene=CCL7</a>       |
| SELPLG  | Selectin P Ligand                               | Protein Coding | 51 | GC12M108621 | 1.995840073 | <a href="https://www.genecards.org/cgi-bin/carddisp.pl?gene=SELPLG">https://www.genecards.org/cgi-bin/carddisp.pl?gene=SELPLG</a>   |
| C4B     | Complement C4B (Chido Blood Group)              | Protein Coding | 48 | GC06P032014 | 1.993642092 | <a href="https://www.genecards.org/cgi-bin/carddisp.pl?gene=C4B">https://www.genecards.org/cgi-bin/carddisp.pl?gene=C4B</a>         |
| WNT2    | Wnt Family Member 2                             | Protein Coding | 50 | GC07M117313 | 1.993524075 | <a href="https://www.genecards.org/cgi-bin/carddisp.pl?gene=WNT2">https://www.genecards.org/cgi-bin/carddisp.pl?gene=WNT2</a>       |
| LMX1B   | LIM Homeobox Transcription Factor 1 Beta        | Protein Coding | 51 | GC09P126614 | 1.992806673 | <a href="https://www.genecards.org/cgi-bin/carddisp.pl?gene=LMX1B">https://www.genecards.org/cgi-bin/carddisp.pl?gene=LMX1B</a>     |
| RHOH    | Ras Homolog Family Member H                     | Protein Coding | 51 | GC04P040192 | 1.990023136 | <a href="https://www.genecards.org/cgi-bin/carddisp.pl?gene=RHOH">https://www.genecards.org/cgi-bin/carddisp.pl?gene=RHOH</a>       |
| IL9     | Interleukin 9                                   | Protein Coding | 50 | GC05M135891 | 1.989136219 | <a href="https://www.genecards.org/cgi-bin/carddisp.pl?gene=IL9">https://www.genecards.org/cgi-bin/carddisp.pl?gene=IL9</a>         |
| GRB10   | Growth Factor Receptor Bound Protein 10         | Protein Coding | 49 | GC07M050590 | 1.986071348 | <a href="https://www.genecards.org/cgi-bin/carddisp.pl?gene=GRB10">https://www.genecards.org/cgi-bin/carddisp.pl?gene=GRB10</a>     |
| ROBO1   | Roundabout Guidance Receptor 1                  | Protein Coding | 51 | GC03M078597 | 1.984625578 | <a href="https://www.genecards.org/cgi-bin/carddisp.pl?gene=ROBO1">https://www.genecards.org/cgi-bin/carddisp.pl?gene=ROBO1</a>     |
| COL20A1 | Collagen Type XX Alpha 1 Chain                  | Protein Coding | 44 | GC20P063293 | 1.983115435 | <a href="https://www.genecards.org/cgi-bin/carddisp.pl?gene=COL20A1">https://www.genecards.org/cgi-bin/carddisp.pl?gene=COL20A1</a> |

|         |                                                       |                |    |             |             |                                                                                                                                     |
|---------|-------------------------------------------------------|----------------|----|-------------|-------------|-------------------------------------------------------------------------------------------------------------------------------------|
| PDCD6IP | Programmed Cell Death 6 Interacting Protein           | Protein Coding | 50 | GC03P033798 | 1.98204422  | <a href="https://www.genecards.org/cgi-bin/carddisp.pl?gene=PDCD6IP">https://www.genecards.org/cgi-bin/carddisp.pl?gene=PDCD6IP</a> |
| DCT     | Dopachrome Tautomerase                                | Protein Coding | 52 | GC13M094436 | 1.978040814 | <a href="https://www.genecards.org/cgi-bin/carddisp.pl?gene=DCT">https://www.genecards.org/cgi-bin/carddisp.pl?gene=DCT</a>         |
| MARCKS  | Myristoylated Alanine Rich Protein Kinase C Substrate | Protein Coding | 46 | GC06P113857 | 1.976188779 | <a href="https://www.genecards.org/cgi-bin/carddisp.pl?gene=MARCKS">https://www.genecards.org/cgi-bin/carddisp.pl?gene=MARCKS</a>   |
| SMAD1   | SMAD Family Member 1                                  | Protein Coding | 51 | GC04P145481 | 1.973513365 | <a href="https://www.genecards.org/cgi-bin/carddisp.pl?gene=SMAD1">https://www.genecards.org/cgi-bin/carddisp.pl?gene=SMAD1</a>     |
| CD63    | CD63 Molecule                                         | Protein Coding | 50 | GC12M055725 | 1.972302675 | <a href="https://www.genecards.org/cgi-bin/carddisp.pl?gene=CD63">https://www.genecards.org/cgi-bin/carddisp.pl?gene=CD63</a>       |
| TOP2B   | DNA Topoisomerase II Beta                             | Protein Coding | 52 | GC03M025598 | 1.970924854 | <a href="https://www.genecards.org/cgi-bin/carddisp.pl?gene=TOP2B">https://www.genecards.org/cgi-bin/carddisp.pl?gene=TOP2B</a>     |
| GADD45A | Growth Arrest And DNA Damage Inducible Alpha          | Protein Coding | 50 | GC01P067685 | 1.970365047 | <a href="https://www.genecards.org/cgi-bin/carddisp.pl?gene=GADD45A">https://www.genecards.org/cgi-bin/carddisp.pl?gene=GADD45A</a> |
| HLA-DMA | Major Histocompatibility Complex, Class II, DM Alpha  | Protein Coding | 46 | GC06M071795 | 1.966271639 | <a href="https://www.genecards.org/cgi-bin/carddisp.pl?gene=HLA-DMA">https://www.genecards.org/cgi-bin/carddisp.pl?gene=HLA-DMA</a> |
| TNFRSF8 | TNF Receptor Superfamily Member 8                     | Protein Coding | 50 | GC01P012063 | 1.965282679 | <a href="https://www.genecards.org/cgi-bin/carddisp.pl?gene=TNFRSF8">https://www.genecards.org/cgi-bin/carddisp.pl?gene=TNFRSF8</a> |
| PTPRJ   | Protein Tyrosine Phosphatase Receptor Type J          | Protein Coding | 55 | GC11P048002 | 1.964123964 | <a href="https://www.genecards.org/cgi-bin/carddisp.pl?gene=PTPRJ">https://www.genecards.org/cgi-bin/carddisp.pl?gene=PTPRJ</a>     |
| ADRA1A  | Adrenoceptor Alpha 1A                                 | Protein Coding | 53 | GC08M026747 | 1.963740349 | <a href="https://www.genecards.org/cgi-bin/carddisp.pl?gene=ADRA1A">https://www.genecards.org/cgi-bin/carddisp.pl?gene=ADRA1A</a>   |
| FKBP4   | FKBP Prolyl Isomerase 4                               | Protein Coding | 52 | GC12P002795 | 1.963716984 | <a href="https://www.genecards.org/cgi-bin/carddisp.pl?gene=FKBP4">https://www.genecards.org/cgi-bin/carddisp.pl?gene=FKBP4</a>     |
| POLR3K  | RNA Polymerase III Subunit K                          | Protein Coding | 47 | GC16M000046 | 1.963641405 | <a href="https://www.genecards.org/cgi-bin/carddisp.pl?gene=POLR3K">https://www.genecards.org/cgi-bin/carddisp.pl?gene=POLR3K</a>   |
| MYO5A   | Myosin VA                                             | Protein Coding | 51 | GC15M123722 | 1.962192774 | <a href="https://www.genecards.org/cgi-bin/carddisp.pl?gene=MYO5A">https://www.genecards.org/cgi-bin/carddisp.pl?gene=MYO5A</a>     |
| FRK     | Fyn Related Src Family Tyrosine Kinase                | Protein Coding | 51 | GC06M115931 | 1.962022543 | <a href="https://www.genecards.org/cgi-bin/carddisp.pl?gene=FRK">https://www.genecards.org/cgi-bin/carddisp.pl?gene=FRK</a>         |

|        |                                                      |                |    |             |             |                                                                                                                                   |
|--------|------------------------------------------------------|----------------|----|-------------|-------------|-----------------------------------------------------------------------------------------------------------------------------------|
| SLC6A6 | Solute Carrier Family 6 Member 6                     | Protein Coding | 52 | GC03P014402 | 1.960782766 | <a href="https://www.genecards.org/cgi-bin/carddisp.pl?gene=SLC6A6">https://www.genecards.org/cgi-bin/carddisp.pl?gene=SLC6A6</a> |
| SEMA3A | Semaphorin 3A                                        | Protein Coding | 53 | GC07M083955 | 1.9588871   | <a href="https://www.genecards.org/cgi-bin/carddisp.pl?gene=SEMA3A">https://www.genecards.org/cgi-bin/carddisp.pl?gene=SEMA3A</a> |
| FZD4   | Frizzled Class Receptor 4                            | Protein Coding | 56 | GC11M086945 | 1.957341671 | <a href="https://www.genecards.org/cgi-bin/carddisp.pl?gene=FZD4">https://www.genecards.org/cgi-bin/carddisp.pl?gene=FZD4</a>     |
| NAA10  | N-Alpha-Acetyltransferase 10, NatA Catalytic Subunit | Protein Coding | 52 | GC0XM153929 | 1.954634666 | <a href="https://www.genecards.org/cgi-bin/carddisp.pl?gene=NAA10">https://www.genecards.org/cgi-bin/carddisp.pl?gene=NAA10</a>   |
| S100A7 | S100 Calcium Binding Protein A7                      | Protein Coding | 46 | GC01M153457 | 1.948243737 | <a href="https://www.genecards.org/cgi-bin/carddisp.pl?gene=S100A7">https://www.genecards.org/cgi-bin/carddisp.pl?gene=S100A7</a> |
| FCER2  | Fc Epsilon Receptor II                               | Protein Coding | 50 | GC19M007689 | 1.944807529 | <a href="https://www.genecards.org/cgi-bin/carddisp.pl?gene=FCER2">https://www.genecards.org/cgi-bin/carddisp.pl?gene=FCER2</a>   |
| VASP   | Vasodilator Stimulated Phosphoprotein                | Protein Coding | 50 | GC19P073070 | 1.944025874 | <a href="https://www.genecards.org/cgi-bin/carddisp.pl?gene=VASP">https://www.genecards.org/cgi-bin/carddisp.pl?gene=VASP</a>     |
| TSG101 | Tumor Susceptibility 101                             | Protein Coding | 49 | GC11M018468 | 1.943533421 | <a href="https://www.genecards.org/cgi-bin/carddisp.pl?gene=TSG101">https://www.genecards.org/cgi-bin/carddisp.pl?gene=TSG101</a> |
| S100A1 | S100 Calcium Binding Protein A1                      | Protein Coding | 47 | GC01P153627 | 1.942153215 | <a href="https://www.genecards.org/cgi-bin/carddisp.pl?gene=S100A1">https://www.genecards.org/cgi-bin/carddisp.pl?gene=S100A1</a> |
| LAT    | Linker For Activation Of T Cells                     | Protein Coding | 53 | GC16P042656 | 1.938898325 | <a href="https://www.genecards.org/cgi-bin/carddisp.pl?gene=LAT">https://www.genecards.org/cgi-bin/carddisp.pl?gene=LAT</a>       |
| CCR1   | C-C Motif Chemokine Receptor 1                       | Protein Coding | 52 | GC03M046218 | 1.938135386 | <a href="https://www.genecards.org/cgi-bin/carddisp.pl?gene=CCR1">https://www.genecards.org/cgi-bin/carddisp.pl?gene=CCR1</a>     |
| LYST   | Lysosomal Trafficking Regulator                      | Protein Coding | 45 | GC01M235661 | 1.937011361 | <a href="https://www.genecards.org/cgi-bin/carddisp.pl?gene=LYST">https://www.genecards.org/cgi-bin/carddisp.pl?gene=LYST</a>     |
| ALCAM  | Activated Leukocyte Cell Adhesion Molecule           | Protein Coding | 50 | GC03P105366 | 1.936097383 | <a href="https://www.genecards.org/cgi-bin/carddisp.pl?gene=ALCAM">https://www.genecards.org/cgi-bin/carddisp.pl?gene=ALCAM</a>   |
| TJP1   | Tight Junction Protein 1                             | Protein Coding | 51 | GC15M029699 | 1.935941458 | <a href="https://www.genecards.org/cgi-bin/carddisp.pl?gene=TJP1">https://www.genecards.org/cgi-bin/carddisp.pl?gene=TJP1</a>     |
| EFNB2  | Ephrin B2                                            | Protein Coding | 50 | GC13M106489 | 1.931266308 | <a href="https://www.genecards.org/cgi-bin/carddisp.pl?gene=EFNB2">https://www.genecards.org/cgi-bin/carddisp.pl?gene=EFNB2</a>   |



|         |                                                         |                |    |             |             |                                                                                                                                       |
|---------|---------------------------------------------------------|----------------|----|-------------|-------------|---------------------------------------------------------------------------------------------------------------------------------------|
| STAT2   | Signal Transducer And Activator Of Transcription 2      | Protein Coding | 55 | GC12M056341 | 1.929269314 | <a href="https://www.genecards.org/cgi-bin/carddisp.pl?gene=STAT2">https://www.genecards.org/cgi-bin/carddisp.pl?gene=STAT2</a>       |
| RPL19   | Ribosomal Protein L19                                   | Protein Coding | 48 | GC17P039200 | 1.925439119 | <a href="https://www.genecards.org/cgi-bin/carddisp.pl?gene=RPL19">https://www.genecards.org/cgi-bin/carddisp.pl?gene=RPL19</a>       |
| HTR1B   | 5-Hydroxytryptamine Receptor 1B                         | Protein Coding | 50 | GC06M077488 | 1.925381422 | <a href="https://www.genecards.org/cgi-bin/carddisp.pl?gene=HTR1B">https://www.genecards.org/cgi-bin/carddisp.pl?gene=HTR1B</a>       |
| FER     | FER Tyrosine Kinase                                     | Protein Coding | 52 | GC05P108747 | 1.925205708 | <a href="https://www.genecards.org/cgi-bin/carddisp.pl?gene=FER">https://www.genecards.org/cgi-bin/carddisp.pl?gene=FER</a>           |
| RAPGEF3 | Rap Guanine Nucleotide Exchange Factor 3                | Protein Coding | 51 | GC12M047736 | 1.919921637 | <a href="https://www.genecards.org/cgi-bin/carddisp.pl?gene=RAPGEF3">https://www.genecards.org/cgi-bin/carddisp.pl?gene=RAPGEF3</a>   |
| PATJ    | PATJ Crumbs Cell Polarity Complex Component             | Protein Coding | 43 | GC01P061743 | 1.919464111 | <a href="https://www.genecards.org/cgi-bin/carddisp.pl?gene=PATJ">https://www.genecards.org/cgi-bin/carddisp.pl?gene=PATJ</a>         |
| PSMD4   | Proteasome 26S Subunit Ubiquitin Receptor, Non-ATPase 4 | Protein Coding | 50 | GC01P151378 | 1.917000532 | <a href="https://www.genecards.org/cgi-bin/carddisp.pl?gene=PSMD4">https://www.genecards.org/cgi-bin/carddisp.pl?gene=PSMD4</a>       |
| NRXN1   | Neurexin 1                                              | Protein Coding | 55 | GC02M049918 | 1.916447639 | <a href="https://www.genecards.org/cgi-bin/carddisp.pl?gene=NRXN1">https://www.genecards.org/cgi-bin/carddisp.pl?gene=NRXN1</a>       |
| RANBP9  | RAN Binding Protein 9                                   | Protein Coding | 48 | GC06M013621 | 1.916115046 | <a href="https://www.genecards.org/cgi-bin/carddisp.pl?gene=RANBP9">https://www.genecards.org/cgi-bin/carddisp.pl?gene=RANBP9</a>     |
| CEACAM3 | CEA Cell Adhesion Molecule 3                            | Protein Coding | 49 | GC19P041796 | 1.915868282 | <a href="https://www.genecards.org/cgi-bin/carddisp.pl?gene=CEACAM3">https://www.genecards.org/cgi-bin/carddisp.pl?gene=CEACAM3</a>   |
| MAP3K11 | Mitogen-Activated Protein Kinase Kinase Kinase 11       | Protein Coding | 53 | GC11M099713 | 1.914820433 | <a href="https://www.genecards.org/cgi-bin/carddisp.pl?gene=MAP3K11">https://www.genecards.org/cgi-bin/carddisp.pl?gene=MAP3K11</a>   |
| FGF8    | Fibroblast Growth Factor 8                              | Protein Coding | 54 | GC10M101770 | 1.91269207  | <a href="https://www.genecards.org/cgi-bin/carddisp.pl?gene=FGF8">https://www.genecards.org/cgi-bin/carddisp.pl?gene=FGF8</a>         |
| LHX3    | LIM Homeobox 3                                          | Protein Coding | 47 | GC09M136196 | 1.912455797 | <a href="https://www.genecards.org/cgi-bin/carddisp.pl?gene=LHX3">https://www.genecards.org/cgi-bin/carddisp.pl?gene=LHX3</a>         |
| MAP3K14 | Mitogen-Activated Protein Kinase Kinase Kinase 14       | Protein Coding | 51 | GC17M045263 | 1.910337448 | <a href="https://www.genecards.org/cgi-bin/carddisp.pl?gene=MAP3K14">https://www.genecards.org/cgi-bin/carddisp.pl?gene=MAP3K14</a>   |
| MPHOSPH | M-Phase Phosphoprotein 8                                | Protein Coding | 43 | GC13P019633 | 1.903998017 | <a href="https://www.genecards.org/cgi-bin/carddisp.pl?gene=MPHOSPH8">https://www.genecards.org/cgi-bin/carddisp.pl?gene=MPHOSPH8</a> |

|         |                                                                  |                |    |             |             |                                                                                                                                     |
|---------|------------------------------------------------------------------|----------------|----|-------------|-------------|-------------------------------------------------------------------------------------------------------------------------------------|
| SOS2    | SOS Ras/Rho Guanine Nucleotide Exchange Factor 2                 | Protein Coding | 51 | GC14M050117 | 1.903938532 | <a href="https://www.genecards.org/cgi-bin/carddisp.pl?gene=SOS2">https://www.genecards.org/cgi-bin/carddisp.pl?gene=SOS2</a>       |
| NCAM1   | Neural Cell Adhesion Molecule 1                                  | Protein Coding | 55 | GC11P112961 | 1.903778315 | <a href="https://www.genecards.org/cgi-bin/carddisp.pl?gene=NCAM1">https://www.genecards.org/cgi-bin/carddisp.pl?gene=NCAM1</a>     |
| FPR1    | Formyl Peptide Receptor 1                                        | Protein Coding | 54 | GC19M051745 | 1.9031353   | <a href="https://www.genecards.org/cgi-bin/carddisp.pl?gene=FPR1">https://www.genecards.org/cgi-bin/carddisp.pl?gene=FPR1</a>       |
| CEACAM7 | CEA Cell Adhesion Molecule 7                                     | Protein Coding | 44 | GC19M041673 | 1.902526498 | <a href="https://www.genecards.org/cgi-bin/carddisp.pl?gene=CEACAM7">https://www.genecards.org/cgi-bin/carddisp.pl?gene=CEACAM7</a> |
| BCAR1   | BCAR1 Scaffold Protein, Cas Family Member                        | Protein Coding | 50 | GC16M075228 | 1.898793936 | <a href="https://www.genecards.org/cgi-bin/carddisp.pl?gene=BCAR1">https://www.genecards.org/cgi-bin/carddisp.pl?gene=BCAR1</a>     |
| MAP3K1  | Mitogen-Activated Protein Kinase Kinase Kinase 1                 | Protein Coding | 56 | GC05P056815 | 1.898443699 | <a href="https://www.genecards.org/cgi-bin/carddisp.pl?gene=MAP3K1">https://www.genecards.org/cgi-bin/carddisp.pl?gene=MAP3K1</a>   |
| TRPC3   | Transient Receptor Potential Cation Channel Subfamily C Member 3 | Protein Coding | 54 | GC04M121879 | 1.893781662 | <a href="https://www.genecards.org/cgi-bin/carddisp.pl?gene=TRPC3">https://www.genecards.org/cgi-bin/carddisp.pl?gene=TRPC3</a>     |
| DDR2    | Discoidin Domain Receptor Tyrosine Kinase 2                      | Protein Coding | 59 | GC01P162631 | 1.891518831 | <a href="https://www.genecards.org/cgi-bin/carddisp.pl?gene=DDR2">https://www.genecards.org/cgi-bin/carddisp.pl?gene=DDR2</a>       |
| RALA    | RAS Like Proto-Oncogene A                                        | Protein Coding | 52 | GC07P039622 | 1.891065836 | <a href="https://www.genecards.org/cgi-bin/carddisp.pl?gene=RALA">https://www.genecards.org/cgi-bin/carddisp.pl?gene=RALA</a>       |
| CCR7    | C-C Motif Chemokine Receptor 7                                   | Protein Coding | 51 | GC17M051716 | 1.886298895 | <a href="https://www.genecards.org/cgi-bin/carddisp.pl?gene=CCR7">https://www.genecards.org/cgi-bin/carddisp.pl?gene=CCR7</a>       |
| KRT9    | Keratin 9                                                        | Protein Coding | 48 | GC17M041565 | 1.88619864  | <a href="https://www.genecards.org/cgi-bin/carddisp.pl?gene=KRT9">https://www.genecards.org/cgi-bin/carddisp.pl?gene=KRT9</a>       |
| SSTR5   | Somatostatin Receptor 5                                          | Protein Coding | 49 | GC16P001072 | 1.884937763 | <a href="https://www.genecards.org/cgi-bin/carddisp.pl?gene=SSTR5">https://www.genecards.org/cgi-bin/carddisp.pl?gene=SSTR5</a>     |
| SEC23IP | SEC23 Interacting Protein                                        | Protein Coding | 46 | GC10P119892 | 1.882997751 | <a href="https://www.genecards.org/cgi-bin/carddisp.pl?gene=SEC23IP">https://www.genecards.org/cgi-bin/carddisp.pl?gene=SEC23IP</a> |
| CD163   | CD163 Molecule                                                   | Protein Coding | 51 | GC12M008027 | 1.878556132 | <a href="https://www.genecards.org/cgi-bin/carddisp.pl?gene=CD163">https://www.genecards.org/cgi-bin/carddisp.pl?gene=CD163</a>     |
| DRD5    | Dopamine Receptor D5                                             | Protein Coding | 53 | GC04P009783 | 1.877865791 | <a href="https://www.genecards.org/cgi-bin/carddisp.pl?gene=DRD5">https://www.genecards.org/cgi-bin/carddisp.pl?gene=DRD5</a>       |

|        |                                                              |                |    |             |             |                                                                                                                                   |
|--------|--------------------------------------------------------------|----------------|----|-------------|-------------|-----------------------------------------------------------------------------------------------------------------------------------|
| UBE3C  | Ubiquitin Protein Ligase E3C                                 | Protein Coding | 46 | GC07P157138 | 1.877578497 | <a href="https://www.genecards.org/cgi-bin/carddisp.pl?gene=UBE3C">https://www.genecards.org/cgi-bin/carddisp.pl?gene=UBE3C</a>   |
| CARNS1 | Carnosine Synthase 1                                         | Protein Coding | 39 | GC11P067414 | 1.877417564 | <a href="https://www.genecards.org/cgi-bin/carddisp.pl?gene=CARNS1">https://www.genecards.org/cgi-bin/carddisp.pl?gene=CARNS1</a> |
| ARF6   | ADP Ribosylation Factor 6                                    | Protein Coding | 49 | GC14P049895 | 1.875149727 | <a href="https://www.genecards.org/cgi-bin/carddisp.pl?gene=ARF6">https://www.genecards.org/cgi-bin/carddisp.pl?gene=ARF6</a>     |
| KTN1   | Kinectin 1                                                   | Protein Coding | 48 | GC14P055559 | 1.87413168  | <a href="https://www.genecards.org/cgi-bin/carddisp.pl?gene=KTN1">https://www.genecards.org/cgi-bin/carddisp.pl?gene=KTN1</a>     |
| PRMT3  | Protein Arginine Methyltransferase 3                         | Protein Coding | 47 | GC11P020409 | 1.873780608 | <a href="https://www.genecards.org/cgi-bin/carddisp.pl?gene=PRMT3">https://www.genecards.org/cgi-bin/carddisp.pl?gene=PRMT3</a>   |
| NUCB1  | Nucleobindin 1                                               | Protein Coding | 48 | GC19P048900 | 1.873780489 | <a href="https://www.genecards.org/cgi-bin/carddisp.pl?gene=NUCB1">https://www.genecards.org/cgi-bin/carddisp.pl?gene=NUCB1</a>   |
| CDH23  | Cadherin Related 23                                          | Protein Coding | 51 | GC10P071396 | 1.872978449 | <a href="https://www.genecards.org/cgi-bin/carddisp.pl?gene=CDH23">https://www.genecards.org/cgi-bin/carddisp.pl?gene=CDH23</a>   |
| FGF10  | Fibroblast Growth Factor 10                                  | Protein Coding | 53 | GC05M044340 | 1.872734308 | <a href="https://www.genecards.org/cgi-bin/carddisp.pl?gene=FGF10">https://www.genecards.org/cgi-bin/carddisp.pl?gene=FGF10</a>   |
| HGS    | Hepatocyte Growth Factor-Regulated Tyrosine Kinase Substrate | Protein Coding | 50 | GC17P081683 | 1.870378494 | <a href="https://www.genecards.org/cgi-bin/carddisp.pl?gene=HGS">https://www.genecards.org/cgi-bin/carddisp.pl?gene=HGS</a>       |
| ADRA1B | Adrenoceptor Alpha 1B                                        | Protein Coding | 53 | GC05P159867 | 1.867448092 | <a href="https://www.genecards.org/cgi-bin/carddisp.pl?gene=ADRA1B">https://www.genecards.org/cgi-bin/carddisp.pl?gene=ADRA1B</a> |
| BLNK   | B Cell Linker                                                | Protein Coding | 53 | GC10M096259 | 1.864344835 | <a href="https://www.genecards.org/cgi-bin/carddisp.pl?gene=BLNK">https://www.genecards.org/cgi-bin/carddisp.pl?gene=BLNK</a>     |
| PTPN13 | Protein Tyrosine Phosphatase Non-Receptor Type 13            | Protein Coding | 51 | GC04P086594 | 1.858952284 | <a href="https://www.genecards.org/cgi-bin/carddisp.pl?gene=PTPN13">https://www.genecards.org/cgi-bin/carddisp.pl?gene=PTPN13</a> |
| WASL   | WASP Like Actin Nucleation Promoting Factor                  | Protein Coding | 48 | GC07M123681 | 1.858193636 | <a href="https://www.genecards.org/cgi-bin/carddisp.pl?gene=WASL">https://www.genecards.org/cgi-bin/carddisp.pl?gene=WASL</a>     |
| RPL23  | Ribosomal Protein L23                                        | Protein Coding | 47 | GC17M038847 | 1.85684371  | <a href="https://www.genecards.org/cgi-bin/carddisp.pl?gene=RPL23">https://www.genecards.org/cgi-bin/carddisp.pl?gene=RPL23</a>   |
| NEDD4  | NEDD4 E3 Ubiquitin Protein Ligase                            | Protein Coding | 54 | GC15M055826 | 1.856402278 | <a href="https://www.genecards.org/cgi-bin/carddisp.pl?gene=NEDD4">https://www.genecards.org/cgi-bin/carddisp.pl?gene=NEDD4</a>   |

|         |                                            |                |    |             |             |                                                                                                                                     |
|---------|--------------------------------------------|----------------|----|-------------|-------------|-------------------------------------------------------------------------------------------------------------------------------------|
| GREM1   | Gremlin 1, DAN Family BMP Antagonist       | Protein Coding | 50 | GC15P046226 | 1.855420828 | <a href="https://www.genecards.org/cgi-bin/carddisp.pl?gene=GREM1">https://www.genecards.org/cgi-bin/carddisp.pl?gene=GREM1</a>     |
| CSN2    | Casein Beta                                | Protein Coding | 40 | GC04M069955 | 1.854342461 | <a href="https://www.genecards.org/cgi-bin/carddisp.pl?gene=CSN2">https://www.genecards.org/cgi-bin/carddisp.pl?gene=CSN2</a>       |
| CALB2   | Calbindin 2                                | Protein Coding | 46 | GC16P071358 | 1.852124453 | <a href="https://www.genecards.org/cgi-bin/carddisp.pl?gene=CALB2">https://www.genecards.org/cgi-bin/carddisp.pl?gene=CALB2</a>     |
| GLRB    | Glycine Receptor Beta                      | Protein Coding | 53 | GC04P157076 | 1.851535916 | <a href="https://www.genecards.org/cgi-bin/carddisp.pl?gene=GLRB">https://www.genecards.org/cgi-bin/carddisp.pl?gene=GLRB</a>       |
| SULT6B1 | Sulfotransferase Family 6B Member 1        | Protein Coding | 40 | GC02M037167 | 1.847799659 | <a href="https://www.genecards.org/cgi-bin/carddisp.pl?gene=SULT6B1">https://www.genecards.org/cgi-bin/carddisp.pl?gene=SULT6B1</a> |
| EDN3    | Endothelin 3                               | Protein Coding | 51 | GC20P059300 | 1.847703934 | <a href="https://www.genecards.org/cgi-bin/carddisp.pl?gene=EDN3">https://www.genecards.org/cgi-bin/carddisp.pl?gene=EDN3</a>       |
| S100A4  | S100 Calcium Binding Protein A4            | Protein Coding | 52 | GC01M153543 | 1.846493006 | <a href="https://www.genecards.org/cgi-bin/carddisp.pl?gene=S100A4">https://www.genecards.org/cgi-bin/carddisp.pl?gene=S100A4</a>   |
| NOLC1   | Nucleolar And Coiled-Body Phosphoprotein 1 | Protein Coding | 47 | GC10P102152 | 1.845025539 | <a href="https://www.genecards.org/cgi-bin/carddisp.pl?gene=NOLC1">https://www.genecards.org/cgi-bin/carddisp.pl?gene=NOLC1</a>     |
| THY1    | Thy-1 Cell Surface Antigen                 | Protein Coding | 50 | GC11M119417 | 1.843530655 | <a href="https://www.genecards.org/cgi-bin/carddisp.pl?gene=THY1">https://www.genecards.org/cgi-bin/carddisp.pl?gene=THY1</a>       |
| DLG3    | Discs Large MAGUK Scaffold Protein 3       | Protein Coding | 49 | GC0XP070444 | 1.843284726 | <a href="https://www.genecards.org/cgi-bin/carddisp.pl?gene=DLG3">https://www.genecards.org/cgi-bin/carddisp.pl?gene=DLG3</a>       |
| GRK6    | G Protein-Coupled Receptor Kinase 6        | Protein Coding | 53 | GC05P177403 | 1.840342522 | <a href="https://www.genecards.org/cgi-bin/carddisp.pl?gene=GRK6">https://www.genecards.org/cgi-bin/carddisp.pl?gene=GRK6</a>       |
| TNFAIP6 | TNF Alpha Induced Protein 6                | Protein Coding | 47 | GC02P151357 | 1.840254068 | <a href="https://www.genecards.org/cgi-bin/carddisp.pl?gene=TNFAIP6">https://www.genecards.org/cgi-bin/carddisp.pl?gene=TNFAIP6</a> |
| EREG    | Epiregulin                                 | Protein Coding | 50 | GC04P074366 | 1.837180853 | <a href="https://www.genecards.org/cgi-bin/carddisp.pl?gene=EREG">https://www.genecards.org/cgi-bin/carddisp.pl?gene=EREG</a>       |
| PDGFA   | Platelet Derived Growth Factor Subunit A   | Protein Coding | 50 | GC07M000497 | 1.837180853 | <a href="https://www.genecards.org/cgi-bin/carddisp.pl?gene=PDGFA">https://www.genecards.org/cgi-bin/carddisp.pl?gene=PDGFA</a>     |
| ABCC11  | ATP Binding Cassette Subfamily C Member 11 | Protein Coding | 48 | GC16M048166 | 1.835193396 | <a href="https://www.genecards.org/cgi-bin/carddisp.pl?gene=ABCC11">https://www.genecards.org/cgi-bin/carddisp.pl?gene=ABCC11</a>   |

|         |                                                          |                |    |             |             |                                                                                                                                     |
|---------|----------------------------------------------------------|----------------|----|-------------|-------------|-------------------------------------------------------------------------------------------------------------------------------------|
| RPL37   | Ribosomal Protein L37                                    | Protein Coding | 45 | GC05M040825 | 1.834323168 | <a href="https://www.genecards.org/cgi-bin/carddisp.pl?gene=RPL37">https://www.genecards.org/cgi-bin/carddisp.pl?gene=RPL37</a>     |
| PLCL1   | Phospholipase C Like 1 (Inactive)                        | Protein Coding | 46 | GC02P197804 | 1.834127903 | <a href="https://www.genecards.org/cgi-bin/carddisp.pl?gene=PLCL1">https://www.genecards.org/cgi-bin/carddisp.pl?gene=PLCL1</a>     |
| AQP1    | Aquaporin 1 (Colton Blood Group)                         | Protein Coding | 53 | GC07P030911 | 1.833886862 | <a href="https://www.genecards.org/cgi-bin/carddisp.pl?gene=AQP1">https://www.genecards.org/cgi-bin/carddisp.pl?gene=AQP1</a>       |
| FLOT2   | Flotillin 2                                              | Protein Coding | 47 | GC17M051195 | 1.832614422 | <a href="https://www.genecards.org/cgi-bin/carddisp.pl?gene=FLOT2">https://www.genecards.org/cgi-bin/carddisp.pl?gene=FLOT2</a>     |
| CREM    | CAMP Responsive Element Modulator                        | Protein Coding | 48 | GC10P035126 | 1.831388235 | <a href="https://www.genecards.org/cgi-bin/carddisp.pl?gene=CREM">https://www.genecards.org/cgi-bin/carddisp.pl?gene=CREM</a>       |
| NRP2    | Neuropilin 2                                             | Protein Coding | 52 | GC02P205681 | 1.830303192 | <a href="https://www.genecards.org/cgi-bin/carddisp.pl?gene=NRP2">https://www.genecards.org/cgi-bin/carddisp.pl?gene=NRP2</a>       |
| BDKRB1  | Bradykinin Receptor B1                                   | Protein Coding | 48 | GC14P096302 | 1.830173969 | <a href="https://www.genecards.org/cgi-bin/carddisp.pl?gene=BDKRB1">https://www.genecards.org/cgi-bin/carddisp.pl?gene=BDKRB1</a>   |
| DIABLO  | Diablo IAP-Binding Mitochondrial Protein                 | Protein Coding | 53 | GC12M122497 | 1.829569101 | <a href="https://www.genecards.org/cgi-bin/carddisp.pl?gene=DIABLO">https://www.genecards.org/cgi-bin/carddisp.pl?gene=DIABLO</a>   |
| OGDHL   | Oxoglutarate Dehydrogenase L                             | Protein Coding | 47 | GC10M049734 | 1.827629805 | <a href="https://www.genecards.org/cgi-bin/carddisp.pl?gene=OGDHL">https://www.genecards.org/cgi-bin/carddisp.pl?gene=OGDHL</a>     |
| ATP2C1  | ATPase Secretory Pathway Ca <sup>2+</sup> Transporting 1 | Protein Coding | 51 | GC03P130850 | 1.827577353 | <a href="https://www.genecards.org/cgi-bin/carddisp.pl?gene=ATP2C1">https://www.genecards.org/cgi-bin/carddisp.pl?gene=ATP2C1</a>   |
| H1-2    | H1.2 Linker Histone, Cluster Member                      | Protein Coding | 46 | GC06M026056 | 1.826867104 | <a href="https://www.genecards.org/cgi-bin/carddisp.pl?gene=H1-2">https://www.genecards.org/cgi-bin/carddisp.pl?gene=H1-2</a>       |
| HRH2    | Histamine Receptor H2                                    | Protein Coding | 50 | GC05P175659 | 1.824629188 | <a href="https://www.genecards.org/cgi-bin/carddisp.pl?gene=HRH2">https://www.genecards.org/cgi-bin/carddisp.pl?gene=HRH2</a>       |
| PSME3   | Proteasome Activator Subunit 3                           | Protein Coding | 47 | GC17P042824 | 1.823475361 | <a href="https://www.genecards.org/cgi-bin/carddisp.pl?gene=PSME3">https://www.genecards.org/cgi-bin/carddisp.pl?gene=PSME3</a>     |
| PTPN12  | Protein Tyrosine Phosphatase Non-Receptor Type 12        | Protein Coding | 55 | GC07P077537 | 1.822618484 | <a href="https://www.genecards.org/cgi-bin/carddisp.pl?gene=PTPN12">https://www.genecards.org/cgi-bin/carddisp.pl?gene=PTPN12</a>   |
| RPS6KA5 | Ribosomal Protein S6 Kinase A5                           | Protein Coding | 52 | GC14M090847 | 1.822618484 | <a href="https://www.genecards.org/cgi-bin/carddisp.pl?gene=RPS6KA5">https://www.genecards.org/cgi-bin/carddisp.pl?gene=RPS6KA5</a> |

|         |                                                  |                |    |             |             |                                                                                                                                     |
|---------|--------------------------------------------------|----------------|----|-------------|-------------|-------------------------------------------------------------------------------------------------------------------------------------|
| CAPN1   | Calpain 1                                        | Protein Coding | 57 | GC11P070846 | 1.822430849 | <a href="https://www.genecards.org/cgi-bin/carddisp.pl?gene=CAPN1">https://www.genecards.org/cgi-bin/carddisp.pl?gene=CAPN1</a>     |
| ARHGEF1 | Rho Guanine Nucleotide Exchange Factor 1         | Protein Coding | 53 | GC19P041883 | 1.820183396 | <a href="https://www.genecards.org/cgi-bin/carddisp.pl?gene=ARHGEF1">https://www.genecards.org/cgi-bin/carddisp.pl?gene=ARHGEF1</a> |
| SLC6A11 | Solute Carrier Family 6 Member 11                | Protein Coding | 47 | GC03P013696 | 1.819394827 | <a href="https://www.genecards.org/cgi-bin/carddisp.pl?gene=SLC6A11">https://www.genecards.org/cgi-bin/carddisp.pl?gene=SLC6A11</a> |
| MYOZ2   | Myozenin 2                                       | Protein Coding | 46 | GC04P119135 | 1.819327593 | <a href="https://www.genecards.org/cgi-bin/carddisp.pl?gene=MYOZ2">https://www.genecards.org/cgi-bin/carddisp.pl?gene=MYOZ2</a>     |
| HCAR3   | Hydroxycarboxylic Acid Receptor 3                | Protein Coding | 42 | GC12M122714 | 1.818952322 | <a href="https://www.genecards.org/cgi-bin/carddisp.pl?gene=HCAR3">https://www.genecards.org/cgi-bin/carddisp.pl?gene=HCAR3</a>     |
| NISCH   | Nischarin                                        | Protein Coding | 50 | GC03P052455 | 1.817929626 | <a href="https://www.genecards.org/cgi-bin/carddisp.pl?gene=NISCH">https://www.genecards.org/cgi-bin/carddisp.pl?gene=NISCH</a>     |
| NRG4    | Neuregulin 4                                     | Protein Coding | 46 | GC15M075935 | 1.813503981 | <a href="https://www.genecards.org/cgi-bin/carddisp.pl?gene=NRG4">https://www.genecards.org/cgi-bin/carddisp.pl?gene=NRG4</a>       |
| CHRM1   | Cholinergic Receptor Muscarinic 1                | Protein Coding | 52 | GC11M099605 | 1.81216979  | <a href="https://www.genecards.org/cgi-bin/carddisp.pl?gene=CHRM1">https://www.genecards.org/cgi-bin/carddisp.pl?gene=CHRM1</a>     |
| PTPRA   | Protein Tyrosine Phosphatase Receptor Type A     | Protein Coding | 52 | GC20P002864 | 1.810213327 | <a href="https://www.genecards.org/cgi-bin/carddisp.pl?gene=PTPRA">https://www.genecards.org/cgi-bin/carddisp.pl?gene=PTPRA</a>     |
| MAPK12  | Mitogen-Activated Protein Kinase 12              | Protein Coding | 54 | GC22M061616 | 1.809207439 | <a href="https://www.genecards.org/cgi-bin/carddisp.pl?gene=MAPK12">https://www.genecards.org/cgi-bin/carddisp.pl?gene=MAPK12</a>   |
| BMX     | BMX Non-Receptor Tyrosine Kinase                 | Protein Coding | 51 | GC0XP015392 | 1.80903244  | <a href="https://www.genecards.org/cgi-bin/carddisp.pl?gene=BMX">https://www.genecards.org/cgi-bin/carddisp.pl?gene=BMX</a>         |
| PTPN6   | Protein Tyrosine Phosphatase Non-Receptor Type 6 | Protein Coding | 56 | GC12P023562 | 1.804846287 | <a href="https://www.genecards.org/cgi-bin/carddisp.pl?gene=PTPN6">https://www.genecards.org/cgi-bin/carddisp.pl?gene=PTPN6</a>     |
| PTPRS   | Protein Tyrosine Phosphatase Receptor Type S     | Protein Coding | 52 | GC19M006881 | 1.800232887 | <a href="https://www.genecards.org/cgi-bin/carddisp.pl?gene=PTPRS">https://www.genecards.org/cgi-bin/carddisp.pl?gene=PTPRS</a>     |
| CDH5    | Cadherin 5                                       | Protein Coding | 52 | GC16P066366 | 1.79877305  | <a href="https://www.genecards.org/cgi-bin/carddisp.pl?gene=CDH5">https://www.genecards.org/cgi-bin/carddisp.pl?gene=CDH5</a>       |
| IL10RA  | Interleukin 10 Receptor Subunit Alpha            | Protein Coding | 53 | GC11P117987 | 1.796459913 | <a href="https://www.genecards.org/cgi-bin/carddisp.pl?gene=IL10RA">https://www.genecards.org/cgi-bin/carddisp.pl?gene=IL10RA</a>   |

|         |                                                                      |                |    |             |             |                                                                                                                                     |
|---------|----------------------------------------------------------------------|----------------|----|-------------|-------------|-------------------------------------------------------------------------------------------------------------------------------------|
| FES     | FES Proto-Oncogene, Tyrosine Kinase                                  | Protein Coding | 54 | GC15P090883 | 1.794123411 | <a href="https://www.genecards.org/cgi-bin/carddisp.pl?gene=FES">https://www.genecards.org/cgi-bin/carddisp.pl?gene=FES</a>         |
| EPS15   | Epidermal Growth Factor Receptor Pathway Substrate 15                | Protein Coding | 51 | GC01M051354 | 1.792013168 | <a href="https://www.genecards.org/cgi-bin/carddisp.pl?gene=EPS15">https://www.genecards.org/cgi-bin/carddisp.pl?gene=EPS15</a>     |
| TPTE    | Transmembrane Phosphatase With Tensin Homology                       | Protein Coding | 43 | GC21P010521 | 1.791667461 | <a href="https://www.genecards.org/cgi-bin/carddisp.pl?gene=TPTE">https://www.genecards.org/cgi-bin/carddisp.pl?gene=TPTE</a>       |
| MAP1B   | Microtubule Associated Protein 1B                                    | Protein Coding | 51 | GC05P072107 | 1.789745569 | <a href="https://www.genecards.org/cgi-bin/carddisp.pl?gene=MAP1B">https://www.genecards.org/cgi-bin/carddisp.pl?gene=MAP1B</a>     |
| DUSP2   | Dual Specificity Phosphatase 2                                       | Protein Coding | 46 | GC02M098753 | 1.78924489  | <a href="https://www.genecards.org/cgi-bin/carddisp.pl?gene=DUSP2">https://www.genecards.org/cgi-bin/carddisp.pl?gene=DUSP2</a>     |
| MCM7    | Minichromosome Maintenance Complex Component 7                       | Protein Coding | 52 | GC07M100092 | 1.788851023 | <a href="https://www.genecards.org/cgi-bin/carddisp.pl?gene=MCM7">https://www.genecards.org/cgi-bin/carddisp.pl?gene=MCM7</a>       |
| BBS9    | Bardet-Biedl Syndrome 9                                              | Protein Coding | 45 | GC07P033323 | 1.786626101 | <a href="https://www.genecards.org/cgi-bin/carddisp.pl?gene=BBS9">https://www.genecards.org/cgi-bin/carddisp.pl?gene=BBS9</a>       |
| LCP2    | Lymphocyte Cytosolic Protein 2                                       | Protein Coding | 50 | GC05M170246 | 1.783881903 | <a href="https://www.genecards.org/cgi-bin/carddisp.pl?gene=LCP2">https://www.genecards.org/cgi-bin/carddisp.pl?gene=LCP2</a>       |
| MAP4K4  | Mitogen-Activated Protein Kinase Kinase Kinase Kinase 4              | Protein Coding | 54 | GC02P101696 | 1.783666372 | <a href="https://www.genecards.org/cgi-bin/carddisp.pl?gene=MAP4K4">https://www.genecards.org/cgi-bin/carddisp.pl?gene=MAP4K4</a>   |
| MAGI3   | Membrane Associated Guanylate Kinase, WW And PDZ Domain Containing 3 | Protein Coding | 40 | GC01P113390 | 1.782776356 | <a href="https://www.genecards.org/cgi-bin/carddisp.pl?gene=MAGI3">https://www.genecards.org/cgi-bin/carddisp.pl?gene=MAGI3</a>     |
| RELN    | Reelin                                                               | Protein Coding | 51 | GC07M103471 | 1.78237772  | <a href="https://www.genecards.org/cgi-bin/carddisp.pl?gene=RELN">https://www.genecards.org/cgi-bin/carddisp.pl?gene=RELN</a>       |
| STAT4   | Signal Transducer And Activator Of Transcription 4                   | Protein Coding | 53 | GC02M191029 | 1.777585745 | <a href="https://www.genecards.org/cgi-bin/carddisp.pl?gene=STAT4">https://www.genecards.org/cgi-bin/carddisp.pl?gene=STAT4</a>     |
| TTK     | TTK Protein Kinase                                                   | Protein Coding | 55 | GC06P080003 | 1.777347088 | <a href="https://www.genecards.org/cgi-bin/carddisp.pl?gene=TTK">https://www.genecards.org/cgi-bin/carddisp.pl?gene=TTK</a>         |
| PNOC    | Prepronociceptin                                                     | Protein Coding | 44 | GC08P028316 | 1.774571419 | <a href="https://www.genecards.org/cgi-bin/carddisp.pl?gene=PNOC">https://www.genecards.org/cgi-bin/carddisp.pl?gene=PNOC</a>       |
| ARHGEF7 | Rho Guanine Nucleotide Exchange Factor 7                             | Protein Coding | 49 | GC13P111114 | 1.77340126  | <a href="https://www.genecards.org/cgi-bin/carddisp.pl?gene=ARHGEF7">https://www.genecards.org/cgi-bin/carddisp.pl?gene=ARHGEF7</a> |

|         |                                                   |                |    |             |             |                                                                                                                                     |
|---------|---------------------------------------------------|----------------|----|-------------|-------------|-------------------------------------------------------------------------------------------------------------------------------------|
| PIP5KL1 | Phosphatidylinositol-4-Phosphate 5-Kinase Like 1  | Protein Coding | 41 | GC09M127920 | 1.773319483 | <a href="https://www.genecards.org/cgi-bin/carddisp.pl?gene=PIP5KL1">https://www.genecards.org/cgi-bin/carddisp.pl?gene=PIP5KL1</a> |
| AP2M1   | Adaptor Related Protein Complex 2 Subunit Mu 1    | Protein Coding | 52 | GC03P184174 | 1.772878528 | <a href="https://www.genecards.org/cgi-bin/carddisp.pl?gene=AP2M1">https://www.genecards.org/cgi-bin/carddisp.pl?gene=AP2M1</a>     |
| SIGLEC7 | Sialic Acid Binding Ig Like Lectin 7              | Protein Coding | 48 | GC19P051142 | 1.770597219 | <a href="https://www.genecards.org/cgi-bin/carddisp.pl?gene=SIGLEC7">https://www.genecards.org/cgi-bin/carddisp.pl?gene=SIGLEC7</a> |
| PTGFR   | Prostaglandin F Receptor                          | Protein Coding | 52 | GC01P078303 | 1.767858982 | <a href="https://www.genecards.org/cgi-bin/carddisp.pl?gene=PTGFR">https://www.genecards.org/cgi-bin/carddisp.pl?gene=PTGFR</a>     |
| OPRK1   | Opioid Receptor Kappa 1                           | Protein Coding | 52 | GC08M053227 | 1.767608881 | <a href="https://www.genecards.org/cgi-bin/carddisp.pl?gene=OPRK1">https://www.genecards.org/cgi-bin/carddisp.pl?gene=OPRK1</a>     |
| NTF4    | Neurotrophin 4                                    | Protein Coding | 53 | GC19M070877 | 1.765598536 | <a href="https://www.genecards.org/cgi-bin/carddisp.pl?gene=NTF4">https://www.genecards.org/cgi-bin/carddisp.pl?gene=NTF4</a>       |
| CD82    | CD82 Molecule                                     | Protein Coding | 50 | GC11P044586 | 1.765353203 | <a href="https://www.genecards.org/cgi-bin/carddisp.pl?gene=CD82">https://www.genecards.org/cgi-bin/carddisp.pl?gene=CD82</a>       |
| BYSL    | Bystin Like                                       | Protein Coding | 44 | GC06P092335 | 1.764038563 | <a href="https://www.genecards.org/cgi-bin/carddisp.pl?gene=BYSL">https://www.genecards.org/cgi-bin/carddisp.pl?gene=BYSL</a>       |
| LRPAP1  | LDL Receptor Related Protein Associated Protein 1 | Protein Coding | 50 | GC04M003508 | 1.763132095 | <a href="https://www.genecards.org/cgi-bin/carddisp.pl?gene=LRPAP1">https://www.genecards.org/cgi-bin/carddisp.pl?gene=LRPAP1</a>   |
| DUSP4   | Dual Specificity Phosphatase 4                    | Protein Coding | 48 | GC08M029334 | 1.76159811  | <a href="https://www.genecards.org/cgi-bin/carddisp.pl?gene=DUSP4">https://www.genecards.org/cgi-bin/carddisp.pl?gene=DUSP4</a>     |
| SHROOM3 | Shroom Family Member 3                            | Protein Coding | 44 | GC04P076435 | 1.760527134 | <a href="https://www.genecards.org/cgi-bin/carddisp.pl?gene=SHROOM3">https://www.genecards.org/cgi-bin/carddisp.pl?gene=SHROOM3</a> |
| TUBA4A  | Tubulin Alpha 4a                                  | Protein Coding | 53 | GC02M219249 | 1.75995791  | <a href="https://www.genecards.org/cgi-bin/carddisp.pl?gene=TUBA4A">https://www.genecards.org/cgi-bin/carddisp.pl?gene=TUBA4A</a>   |
| SSTR1   | Somatostatin Receptor 1                           | Protein Coding | 50 | GC14P038207 | 1.759299755 | <a href="https://www.genecards.org/cgi-bin/carddisp.pl?gene=SSTR1">https://www.genecards.org/cgi-bin/carddisp.pl?gene=SSTR1</a>     |
| NES     | Nestin                                            | Protein Coding | 47 | GC01M156668 | 1.757391214 | <a href="https://www.genecards.org/cgi-bin/carddisp.pl?gene=NES">https://www.genecards.org/cgi-bin/carddisp.pl?gene=NES</a>         |
| POLI    | DNA Polymerase Iota                               | Protein Coding | 48 | GC18P054274 | 1.755850792 | <a href="https://www.genecards.org/cgi-bin/carddisp.pl?gene=POLI">https://www.genecards.org/cgi-bin/carddisp.pl?gene=POLI</a>       |



|         |                                                    |                |    |             |             |                                                                                                                                     |
|---------|----------------------------------------------------|----------------|----|-------------|-------------|-------------------------------------------------------------------------------------------------------------------------------------|
| DDX60L  | DExD/H-Box 60 Like                                 | Protein Coding | 38 | GC04M168356 | 1.755546331 | <a href="https://www.genecards.org/cgi-bin/carddisp.pl?gene=DDX60L">https://www.genecards.org/cgi-bin/carddisp.pl?gene=DDX60L</a>   |
| C5      | Complement C5                                      | Protein Coding | 53 | GC09M120933 | 1.753865361 | <a href="https://www.genecards.org/cgi-bin/carddisp.pl?gene=C5">https://www.genecards.org/cgi-bin/carddisp.pl?gene=C5</a>           |
| IL18R1  | Interleukin 18 Receptor 1                          | Protein Coding | 50 | GC02P102311 | 1.750156641 | <a href="https://www.genecards.org/cgi-bin/carddisp.pl?gene=IL18R1">https://www.genecards.org/cgi-bin/carddisp.pl?gene=IL18R1</a>   |
| MYOG    | Myogenin                                           | Protein Coding | 46 | GC01M203083 | 1.747856379 | <a href="https://www.genecards.org/cgi-bin/carddisp.pl?gene=MYOG">https://www.genecards.org/cgi-bin/carddisp.pl?gene=MYOG</a>       |
| SEMA7A  | Semaphorin 7A (John Milton Hagen Blood Group)      | Protein Coding | 51 | GC15M074409 | 1.747343063 | <a href="https://www.genecards.org/cgi-bin/carddisp.pl?gene=SEMA7A">https://www.genecards.org/cgi-bin/carddisp.pl?gene=SEMA7A</a>   |
| CD80    | CD80 Molecule                                      | Protein Coding | 51 | GC03M119524 | 1.745079517 | <a href="https://www.genecards.org/cgi-bin/carddisp.pl?gene=CD80">https://www.genecards.org/cgi-bin/carddisp.pl?gene=CD80</a>       |
| DUSP6   | Dual Specificity Phosphatase 6                     | Protein Coding | 55 | GC12M089347 | 1.744764328 | <a href="https://www.genecards.org/cgi-bin/carddisp.pl?gene=DUSP6">https://www.genecards.org/cgi-bin/carddisp.pl?gene=DUSP6</a>     |
| RPL26L1 | Ribosomal Protein L26 Like 1                       | Protein Coding | 40 | GC05P172956 | 1.743719578 | <a href="https://www.genecards.org/cgi-bin/carddisp.pl?gene=RPL26L1">https://www.genecards.org/cgi-bin/carddisp.pl?gene=RPL26L1</a> |
| NMUR1   | Neuromedin U Receptor 1                            | Protein Coding | 48 | GC02M231986 | 1.743004799 | <a href="https://www.genecards.org/cgi-bin/carddisp.pl?gene=NMUR1">https://www.genecards.org/cgi-bin/carddisp.pl?gene=NMUR1</a>     |
| KAT6A   | Lysine Acetyltransferase 6A                        | Protein Coding | 52 | GC08M041929 | 1.74228096  | <a href="https://www.genecards.org/cgi-bin/carddisp.pl?gene=KAT6A">https://www.genecards.org/cgi-bin/carddisp.pl?gene=KAT6A</a>     |
| SEMA3C  | Semaphorin 3C                                      | Protein Coding | 51 | GC07M080742 | 1.742024899 | <a href="https://www.genecards.org/cgi-bin/carddisp.pl?gene=SEMA3C">https://www.genecards.org/cgi-bin/carddisp.pl?gene=SEMA3C</a>   |
| SIGLEC5 | Sialic Acid Binding Ig Like Lectin 5               | Protein Coding | 47 | GC19M071022 | 1.737704039 | <a href="https://www.genecards.org/cgi-bin/carddisp.pl?gene=SIGLEC5">https://www.genecards.org/cgi-bin/carddisp.pl?gene=SIGLEC5</a> |
| H2BC12L | H2B Clustered Histone 12 Like                      | Protein Coding | 34 | GC21P043569 | 1.736407399 | <a href="https://www.genecards.org/cgi-bin/carddisp.pl?gene=H2BC12L">https://www.genecards.org/cgi-bin/carddisp.pl?gene=H2BC12L</a> |
| GRIN3A  | Glutamate Ionotropic Receptor NMDA Type Subunit 3A | Protein Coding | 46 | GC09M101569 | 1.736349583 | <a href="https://www.genecards.org/cgi-bin/carddisp.pl?gene=GRIN3A">https://www.genecards.org/cgi-bin/carddisp.pl?gene=GRIN3A</a>   |
| CORT    | Cortistatin                                        | Protein Coding | 41 | GC01P010529 | 1.734572053 | <a href="https://www.genecards.org/cgi-bin/carddisp.pl?gene=CORT">https://www.genecards.org/cgi-bin/carddisp.pl?gene=CORT</a>       |

|         |                                                  |                |    |             |             |                                                                                                                                     |
|---------|--------------------------------------------------|----------------|----|-------------|-------------|-------------------------------------------------------------------------------------------------------------------------------------|
| RGS4    | Regulator Of G Protein Signaling 4               | Protein Coding | 48 | GC01P163038 | 1.734306216 | <a href="https://www.genecards.org/cgi-bin/carddisp.pl?gene=RGS4">https://www.genecards.org/cgi-bin/carddisp.pl?gene=RGS4</a>       |
| HAPLN1  | Hyaluronan And Proteoglycan Link Protein 1       | Protein Coding | 48 | GC05M083637 | 1.732725978 | <a href="https://www.genecards.org/cgi-bin/carddisp.pl?gene=HAPLN1">https://www.genecards.org/cgi-bin/carddisp.pl?gene=HAPLN1</a>   |
| SCG2    | Secretogranin II                                 | Protein Coding | 46 | GC02M223596 | 1.731810331 | <a href="https://www.genecards.org/cgi-bin/carddisp.pl?gene=SCG2">https://www.genecards.org/cgi-bin/carddisp.pl?gene=SCG2</a>       |
| GIT1    | GIT ArfGAP 1                                     | Protein Coding | 49 | GC17M029573 | 1.728217602 | <a href="https://www.genecards.org/cgi-bin/carddisp.pl?gene=GIT1">https://www.genecards.org/cgi-bin/carddisp.pl?gene=GIT1</a>       |
| RAB9A   | RAB9A, Member RAS Oncogene Family                | Protein Coding | 45 | GC0XP013707 | 1.727880001 | <a href="https://www.genecards.org/cgi-bin/carddisp.pl?gene=RAB9A">https://www.genecards.org/cgi-bin/carddisp.pl?gene=RAB9A</a>     |
| TRIM27  | Tripartite Motif Containing 27                   | Protein Coding | 48 | GC06M028903 | 1.726555586 | <a href="https://www.genecards.org/cgi-bin/carddisp.pl?gene=TRIM27">https://www.genecards.org/cgi-bin/carddisp.pl?gene=TRIM27</a>   |
| PGAM4   | Phosphoglycerate Mutase Family Member 4          | Protein Coding | 41 | GC0XM077967 | 1.725485802 | <a href="https://www.genecards.org/cgi-bin/carddisp.pl?gene=PGAM4">https://www.genecards.org/cgi-bin/carddisp.pl?gene=PGAM4</a>     |
| IFNAR1  | Interferon Alpha And Beta Receptor Subunit 1     | Protein Coding | 55 | GC21P033324 | 1.725248218 | <a href="https://www.genecards.org/cgi-bin/carddisp.pl?gene=IFNAR1">https://www.genecards.org/cgi-bin/carddisp.pl?gene=IFNAR1</a>   |
| HOXA10  | Homeobox A10                                     | Protein Coding | 47 | GC07M027673 | 1.723849893 | <a href="https://www.genecards.org/cgi-bin/carddisp.pl?gene=HOXA10">https://www.genecards.org/cgi-bin/carddisp.pl?gene=HOXA10</a>   |
| MAP2K6  | Mitogen-Activated Protein Kinase Kinase 6        | Protein Coding | 53 | GC17P069414 | 1.720388412 | <a href="https://www.genecards.org/cgi-bin/carddisp.pl?gene=MAP2K6">https://www.genecards.org/cgi-bin/carddisp.pl?gene=MAP2K6</a>   |
| PENK    | Proenkephalin                                    | Protein Coding | 45 | GC08M056436 | 1.717689514 | <a href="https://www.genecards.org/cgi-bin/carddisp.pl?gene=PENK">https://www.genecards.org/cgi-bin/carddisp.pl?gene=PENK</a>       |
| SNTA1   | Syntrophin Alpha 1                               | Protein Coding | 52 | GC20M033407 | 1.717225552 | <a href="https://www.genecards.org/cgi-bin/carddisp.pl?gene=SNTA1">https://www.genecards.org/cgi-bin/carddisp.pl?gene=SNTA1</a>     |
| IRF8    | Interferon Regulatory Factor 8                   | Protein Coding | 52 | GC16P085898 | 1.716549635 | <a href="https://www.genecards.org/cgi-bin/carddisp.pl?gene=IRF8">https://www.genecards.org/cgi-bin/carddisp.pl?gene=IRF8</a>       |
| PTPDC1  | Protein Tyrosine Phosphatase Domain Containing 1 | Protein Coding | 39 | GC09P094030 | 1.710317612 | <a href="https://www.genecards.org/cgi-bin/carddisp.pl?gene=PTPDC1">https://www.genecards.org/cgi-bin/carddisp.pl?gene=PTPDC1</a>   |
| ZDHHC13 | Zinc Finger DHHC-Type Palmitoyltransferase 13    | Protein Coding | 44 | GC11P019095 | 1.710026741 | <a href="https://www.genecards.org/cgi-bin/carddisp.pl?gene=ZDHHC13">https://www.genecards.org/cgi-bin/carddisp.pl?gene=ZDHHC13</a> |

|              |                                                    |                |    |             |             |                                                                                                                                               |
|--------------|----------------------------------------------------|----------------|----|-------------|-------------|-----------------------------------------------------------------------------------------------------------------------------------------------|
| SSTR4        | Somatostatin Receptor 4                            | Protein Coding | 47 | GC20P023035 | 1.70855999  | <a href="https://www.genecards.org/cgi-bin/carddisp.pl?gene=SSTR4">https://www.genecards.org/cgi-bin/carddisp.pl?gene=SSTR4</a>               |
| TLK2         | Tousled Like Kinase 2                              | Protein Coding | 52 | GC17P062458 | 1.706749916 | <a href="https://www.genecards.org/cgi-bin/carddisp.pl?gene=TLK2">https://www.genecards.org/cgi-bin/carddisp.pl?gene=TLK2</a>                 |
| MPIG6B       | Megakaryocyte And Platelet Inhibitory Receptor G6b | Protein Coding | 44 | GC06P094327 | 1.706351757 | <a href="https://www.genecards.org/cgi-bin/carddisp.pl?gene=MPIG6B">https://www.genecards.org/cgi-bin/carddisp.pl?gene=MPIG6B</a>             |
| LIFR         | LIF Receptor Subunit Alpha                         | Protein Coding | 53 | GC05M038475 | 1.704889536 | <a href="https://www.genecards.org/cgi-bin/carddisp.pl?gene=LIFR">https://www.genecards.org/cgi-bin/carddisp.pl?gene=LIFR</a>                 |
| ZDHHC2       | Zinc Finger DHHC-Type Palmitoyltransferase 2       | Protein Coding | 44 | GC08P017156 | 1.704699993 | <a href="https://www.genecards.org/cgi-bin/carddisp.pl?gene=ZDHHC2">https://www.genecards.org/cgi-bin/carddisp.pl?gene=ZDHHC2</a>             |
| ZFP36        | ZFP36 Ring Finger Protein                          | Protein Coding | 44 | GC19P039406 | 1.703535914 | <a href="https://www.genecards.org/cgi-bin/carddisp.pl?gene=ZFP36">https://www.genecards.org/cgi-bin/carddisp.pl?gene=ZFP36</a>               |
| IL32         | Interleukin 32                                     | Protein Coding | 45 | GC16P013549 | 1.702359438 | <a href="https://www.genecards.org/cgi-bin/carddisp.pl?gene=IL32">https://www.genecards.org/cgi-bin/carddisp.pl?gene=IL32</a>                 |
| FPR2         | Formyl Peptide Receptor 2                          | Protein Coding | 53 | GC19P051752 | 1.70159018  | <a href="https://www.genecards.org/cgi-bin/carddisp.pl?gene=FPR2">https://www.genecards.org/cgi-bin/carddisp.pl?gene=FPR2</a>                 |
| SNCG         | Synuclein Gamma                                    | Protein Coding | 48 | GC10P094523 | 1.700464964 | <a href="https://www.genecards.org/cgi-bin/carddisp.pl?gene=SNCG">https://www.genecards.org/cgi-bin/carddisp.pl?gene=SNCG</a>                 |
| LOC102724560 | Cystathionine Beta-Synthase Like                   | Protein Coding | 10 | GC21M006444 | 1.700024605 | <a href="https://www.genecards.org/cgi-bin/carddisp.pl?gene=LOC102724560">https://www.genecards.org/cgi-bin/carddisp.pl?gene=LOC102724560</a> |
| DSG2         | Desmoglein 2                                       | Protein Coding | 52 | GC18P031498 | 1.697177649 | <a href="https://www.genecards.org/cgi-bin/carddisp.pl?gene=DSG2">https://www.genecards.org/cgi-bin/carddisp.pl?gene=DSG2</a>                 |
| PDLIM5       | PDZ And LIM Domain 5                               | Protein Coding | 47 | GC04P094451 | 1.693854332 | <a href="https://www.genecards.org/cgi-bin/carddisp.pl?gene=PDLIM5">https://www.genecards.org/cgi-bin/carddisp.pl?gene=PDLIM5</a>             |
| OPRL1        | Opioid Related Nociceptin Receptor 1               | Protein Coding | 53 | GC20P064080 | 1.692744732 | <a href="https://www.genecards.org/cgi-bin/carddisp.pl?gene=OPRL1">https://www.genecards.org/cgi-bin/carddisp.pl?gene=OPRL1</a>               |
| SLC7A10      | Solute Carrier Family 7 Member 10                  | Protein Coding | 44 | GC19M033208 | 1.691041231 | <a href="https://www.genecards.org/cgi-bin/carddisp.pl?gene=SLC7A10">https://www.genecards.org/cgi-bin/carddisp.pl?gene=SLC7A10</a>           |
| EPHB2        | EPH Receptor B2                                    | Protein Coding | 59 | GC01P022710 | 1.688824892 | <a href="https://www.genecards.org/cgi-bin/carddisp.pl?gene=EPHB2">https://www.genecards.org/cgi-bin/carddisp.pl?gene=EPHB2</a>               |

|         |                                                    |                |    |             |             |                                                                                                                                     |
|---------|----------------------------------------------------|----------------|----|-------------|-------------|-------------------------------------------------------------------------------------------------------------------------------------|
| PITX2   | Paired Like Homeodomain 2                          | Protein Coding | 52 | GC04M110617 | 1.687981844 | <a href="https://www.genecards.org/cgi-bin/carddisp.pl?gene=PITX2">https://www.genecards.org/cgi-bin/carddisp.pl?gene=PITX2</a>     |
| IL21    | Interleukin 21                                     | Protein Coding | 51 | GC04M122612 | 1.68727994  | <a href="https://www.genecards.org/cgi-bin/carddisp.pl?gene=IL21">https://www.genecards.org/cgi-bin/carddisp.pl?gene=IL21</a>       |
| ZDHHC18 | Zinc Finger DHHC-Type Palmitoyltransferase 18      | Protein Coding | 42 | GC01P028385 | 1.686555862 | <a href="https://www.genecards.org/cgi-bin/carddisp.pl?gene=ZDHHC18">https://www.genecards.org/cgi-bin/carddisp.pl?gene=ZDHHC18</a> |
| DUSP3   | Dual Specificity Phosphatase 3                     | Protein Coding | 51 | GC17M043766 | 1.68346417  | <a href="https://www.genecards.org/cgi-bin/carddisp.pl?gene=DUSP3">https://www.genecards.org/cgi-bin/carddisp.pl?gene=DUSP3</a>     |
| VIPR1   | Vasoactive Intestinal Peptide Receptor 1           | Protein Coding | 52 | GC03P042490 | 1.677259088 | <a href="https://www.genecards.org/cgi-bin/carddisp.pl?gene=VIPR1">https://www.genecards.org/cgi-bin/carddisp.pl?gene=VIPR1</a>     |
| RBL2    | RB Transcriptional Corepressor Like 2              | Protein Coding | 52 | GC16P053433 | 1.67690587  | <a href="https://www.genecards.org/cgi-bin/carddisp.pl?gene=RBL2">https://www.genecards.org/cgi-bin/carddisp.pl?gene=RBL2</a>       |
| OMD     | Osteomodulin                                       | Protein Coding | 46 | GC09M096534 | 1.674594641 | <a href="https://www.genecards.org/cgi-bin/carddisp.pl?gene=OMD">https://www.genecards.org/cgi-bin/carddisp.pl?gene=OMD</a>         |
| EEA1    | Early Endosome Antigen 1                           | Protein Coding | 48 | GC12M092770 | 1.672343969 | <a href="https://www.genecards.org/cgi-bin/carddisp.pl?gene=EEA1">https://www.genecards.org/cgi-bin/carddisp.pl?gene=EEA1</a>       |
| LYVE1   | Lymphatic Vessel Endothelial Hyaluronan Receptor 1 | Protein Coding | 49 | GC11M011131 | 1.659945846 | <a href="https://www.genecards.org/cgi-bin/carddisp.pl?gene=LYVE1">https://www.genecards.org/cgi-bin/carddisp.pl?gene=LYVE1</a>     |
| CD2     | CD2 Molecule                                       | Protein Coding | 51 | GC01P116754 | 1.659570932 | <a href="https://www.genecards.org/cgi-bin/carddisp.pl?gene=CD2">https://www.genecards.org/cgi-bin/carddisp.pl?gene=CD2</a>         |
| GAB2    | GRB2 Associated Binding Protein 2                  | Protein Coding | 50 | GC11M078215 | 1.656756639 | <a href="https://www.genecards.org/cgi-bin/carddisp.pl?gene=GAB2">https://www.genecards.org/cgi-bin/carddisp.pl?gene=GAB2</a>       |
| SRP19   | Signal Recognition Particle 19                     | Protein Coding | 46 | GC05P112862 | 1.65417254  | <a href="https://www.genecards.org/cgi-bin/carddisp.pl?gene=SRP19">https://www.genecards.org/cgi-bin/carddisp.pl?gene=SRP19</a>     |
| PTPRO   | Protein Tyrosine Phosphatase Receptor Type O       | Protein Coding | 54 | GC12P023827 | 1.647766829 | <a href="https://www.genecards.org/cgi-bin/carddisp.pl?gene=PTPRO">https://www.genecards.org/cgi-bin/carddisp.pl?gene=PTPRO</a>     |
| LIPI    | Lipase I                                           | Protein Coding | 42 | GC21M014108 | 1.644866705 | <a href="https://www.genecards.org/cgi-bin/carddisp.pl?gene=LIPI">https://www.genecards.org/cgi-bin/carddisp.pl?gene=LIPI</a>       |
| PTGIR   | Prostaglandin I2 Receptor                          | Protein Coding | 54 | GC19M070781 | 1.644169569 | <a href="https://www.genecards.org/cgi-bin/carddisp.pl?gene=PTGIR">https://www.genecards.org/cgi-bin/carddisp.pl?gene=PTGIR</a>     |

|         |                                                            |                |    |             |             |                                                                                                                                     |
|---------|------------------------------------------------------------|----------------|----|-------------|-------------|-------------------------------------------------------------------------------------------------------------------------------------|
| IL13RA1 | Interleukin 13 Receptor Subunit Alpha 1                    | Protein Coding | 48 | GC0XP118727 | 1.643259287 | <a href="https://www.genecards.org/cgi-bin/carddisp.pl?gene=IL13RA1">https://www.genecards.org/cgi-bin/carddisp.pl?gene=IL13RA1</a> |
| NRTN    | Neurturin                                                  | Protein Coding | 47 | GC19P005805 | 1.643030405 | <a href="https://www.genecards.org/cgi-bin/carddisp.pl?gene=NRTN">https://www.genecards.org/cgi-bin/carddisp.pl?gene=NRTN</a>       |
| PTGDR2  | Prostaglandin D2 Receptor 2                                | Protein Coding | 51 | GC11M060850 | 1.642745137 | <a href="https://www.genecards.org/cgi-bin/carddisp.pl?gene=PTGDR2">https://www.genecards.org/cgi-bin/carddisp.pl?gene=PTGDR2</a>   |
| TGOLN2  | Trans-Golgi Network Protein 2                              | Protein Coding | 44 | GC02M085318 | 1.642578602 | <a href="https://www.genecards.org/cgi-bin/carddisp.pl?gene=TGOLN2">https://www.genecards.org/cgi-bin/carddisp.pl?gene=TGOLN2</a>   |
| EPHA7   | EPH Receptor A7                                            | Protein Coding | 54 | GC06M093240 | 1.64180851  | <a href="https://www.genecards.org/cgi-bin/carddisp.pl?gene=EPHA7">https://www.genecards.org/cgi-bin/carddisp.pl?gene=EPHA7</a>     |
| LTK     | Leukocyte Receptor Tyrosine Kinase                         | Protein Coding | 49 | GC15M041503 | 1.64180851  | <a href="https://www.genecards.org/cgi-bin/carddisp.pl?gene=LTK">https://www.genecards.org/cgi-bin/carddisp.pl?gene=LTK</a>         |
| CCNT1   | Cyclin T1                                                  | Protein Coding | 47 | GC12M048688 | 1.640436649 | <a href="https://www.genecards.org/cgi-bin/carddisp.pl?gene=CCNT1">https://www.genecards.org/cgi-bin/carddisp.pl?gene=CCNT1</a>     |
| GRM3    | Glutamate Metabotropic Receptor 3                          | Protein Coding | 53 | GC07P086643 | 1.639108658 | <a href="https://www.genecards.org/cgi-bin/carddisp.pl?gene=GRM3">https://www.genecards.org/cgi-bin/carddisp.pl?gene=GRM3</a>       |
| ICA1    | Islet Cell Autoantigen 1                                   | Protein Coding | 47 | GC07M008428 | 1.638249993 | <a href="https://www.genecards.org/cgi-bin/carddisp.pl?gene=ICA1">https://www.genecards.org/cgi-bin/carddisp.pl?gene=ICA1</a>       |
| OSMR    | Oncostatin M Receptor                                      | Protein Coding | 52 | GC05P038845 | 1.636943102 | <a href="https://www.genecards.org/cgi-bin/carddisp.pl?gene=OSMR">https://www.genecards.org/cgi-bin/carddisp.pl?gene=OSMR</a>       |
| ICAM3   | Intercellular Adhesion Molecule 3                          | Protein Coding | 50 | GC19M010421 | 1.635703325 | <a href="https://www.genecards.org/cgi-bin/carddisp.pl?gene=ICAM3">https://www.genecards.org/cgi-bin/carddisp.pl?gene=ICAM3</a>     |
| SFRP1   | Secreted Frizzled Related Protein 1                        | Protein Coding | 51 | GC08M041262 | 1.635003924 | <a href="https://www.genecards.org/cgi-bin/carddisp.pl?gene=SFRP1">https://www.genecards.org/cgi-bin/carddisp.pl?gene=SFRP1</a>     |
| KCNJ4   | Potassium Inwardly Rectifying Channel Subfamily J Member 4 | Protein Coding | 50 | GC22M038426 | 1.631995916 | <a href="https://www.genecards.org/cgi-bin/carddisp.pl?gene=KCNJ4">https://www.genecards.org/cgi-bin/carddisp.pl?gene=KCNJ4</a>     |
| LIMK2   | LIM Domain Kinase 2                                        | Protein Coding | 52 | GC22P031212 | 1.629135966 | <a href="https://www.genecards.org/cgi-bin/carddisp.pl?gene=LIMK2">https://www.genecards.org/cgi-bin/carddisp.pl?gene=LIMK2</a>     |
| HAND2   | Heart And Neural Crest Derivatives Expressed 2             | Protein Coding | 50 | GC04M173524 | 1.628247738 | <a href="https://www.genecards.org/cgi-bin/carddisp.pl?gene=HAND2">https://www.genecards.org/cgi-bin/carddisp.pl?gene=HAND2</a>     |

|         |                                                          |                |    |             |             |                                                                                                                                     |
|---------|----------------------------------------------------------|----------------|----|-------------|-------------|-------------------------------------------------------------------------------------------------------------------------------------|
| CDC37   | Cell Division Cycle 37, HSP90 Cochaperone                | Protein Coding | 50 | GC19M010391 | 1.62809515  | <a href="https://www.genecards.org/cgi-bin/carddisp.pl?gene=CDC37">https://www.genecards.org/cgi-bin/carddisp.pl?gene=CDC37</a>     |
| HOXA9   | Homeobox A9                                              | Protein Coding | 45 | GC07M027162 | 1.626486778 | <a href="https://www.genecards.org/cgi-bin/carddisp.pl?gene=HOXA9">https://www.genecards.org/cgi-bin/carddisp.pl?gene=HOXA9</a>     |
| CAPN2   | Calpain 2                                                | Protein Coding | 54 | GC01P223701 | 1.625161171 | <a href="https://www.genecards.org/cgi-bin/carddisp.pl?gene=CAPN2">https://www.genecards.org/cgi-bin/carddisp.pl?gene=CAPN2</a>     |
| BRD8    | Bromodomain Containing 8                                 | Protein Coding | 45 | GC05M138152 | 1.625022411 | <a href="https://www.genecards.org/cgi-bin/carddisp.pl?gene=BRD8">https://www.genecards.org/cgi-bin/carddisp.pl?gene=BRD8</a>       |
| ASCL1   | Achaete-Scute Family BHLH Transcription Factor 1         | Protein Coding | 50 | GC12P102957 | 1.621473312 | <a href="https://www.genecards.org/cgi-bin/carddisp.pl?gene=ASCL1">https://www.genecards.org/cgi-bin/carddisp.pl?gene=ASCL1</a>     |
| EFNB1   | Ephrin B1                                                | Protein Coding | 52 | GC0XP068828 | 1.620697021 | <a href="https://www.genecards.org/cgi-bin/carddisp.pl?gene=EFNB1">https://www.genecards.org/cgi-bin/carddisp.pl?gene=EFNB1</a>     |
| POU2AF1 | POU Class 2 Homeobox Associating Factor 1                | Protein Coding | 44 | GC11M111352 | 1.620057344 | <a href="https://www.genecards.org/cgi-bin/carddisp.pl?gene=POU2AF1">https://www.genecards.org/cgi-bin/carddisp.pl?gene=POU2AF1</a> |
| HMGN2   | High Mobility Group Nucleosomal Binding Domain 2         | Protein Coding | 46 | GC01P026473 | 1.617171049 | <a href="https://www.genecards.org/cgi-bin/carddisp.pl?gene=HMGN2">https://www.genecards.org/cgi-bin/carddisp.pl?gene=HMGN2</a>     |
| LGALS13 | Galectin 13                                              | Protein Coding | 43 | GC19P039602 | 1.616792679 | <a href="https://www.genecards.org/cgi-bin/carddisp.pl?gene=LGALS13">https://www.genecards.org/cgi-bin/carddisp.pl?gene=LGALS13</a> |
| SULF1   | Sulfatase 1                                              | Protein Coding | 49 | GC08P069466 | 1.616624832 | <a href="https://www.genecards.org/cgi-bin/carddisp.pl?gene=SULF1">https://www.genecards.org/cgi-bin/carddisp.pl?gene=SULF1</a>     |
| FGF4    | Fibroblast Growth Factor 4                               | Protein Coding | 50 | GC11M099886 | 1.614102602 | <a href="https://www.genecards.org/cgi-bin/carddisp.pl?gene=FGF4">https://www.genecards.org/cgi-bin/carddisp.pl?gene=FGF4</a>       |
| AKAP1   | A-Kinase Anchoring Protein 1                             | Protein Coding | 47 | GC17P057085 | 1.612334251 | <a href="https://www.genecards.org/cgi-bin/carddisp.pl?gene=AKAP1">https://www.genecards.org/cgi-bin/carddisp.pl?gene=AKAP1</a>     |
| RYK     | Receptor Like Tyrosine Kinase                            | Protein Coding | 50 | GC03M134065 | 1.611094236 | <a href="https://www.genecards.org/cgi-bin/carddisp.pl?gene=RYK">https://www.genecards.org/cgi-bin/carddisp.pl?gene=RYK</a>         |
| CCNB2   | Cyclin B2                                                | Protein Coding | 51 | GC15P059105 | 1.610750675 | <a href="https://www.genecards.org/cgi-bin/carddisp.pl?gene=CCNB2">https://www.genecards.org/cgi-bin/carddisp.pl?gene=CCNB2</a>     |
| TPPP3   | Tubulin Polymerization Promoting Protein Family Member 3 | Protein Coding | 43 | GC16M067389 | 1.609044194 | <a href="https://www.genecards.org/cgi-bin/carddisp.pl?gene=TPPP3">https://www.genecards.org/cgi-bin/carddisp.pl?gene=TPPP3</a>     |

|         |                                                                                        |                |    |             |             |                                                                                                                                     |
|---------|----------------------------------------------------------------------------------------|----------------|----|-------------|-------------|-------------------------------------------------------------------------------------------------------------------------------------|
| CASP14  | Caspase 14                                                                             | Protein Coding | 53 | GC19P015049 | 1.608549476 | <a href="https://www.genecards.org/cgi-bin/carddisp.pl?gene=CASP14">https://www.genecards.org/cgi-bin/carddisp.pl?gene=CASP14</a>   |
| PTPRB   | Protein Tyrosine Phosphatase Receptor Type B                                           | Protein Coding | 52 | GC12M070516 | 1.608270049 | <a href="https://www.genecards.org/cgi-bin/carddisp.pl?gene=PTPRB">https://www.genecards.org/cgi-bin/carddisp.pl?gene=PTPRB</a>     |
| KCND3   | Potassium Voltage-Gated Channel Subfamily D Member 3                                   | Protein Coding | 53 | GC01M111770 | 1.607928157 | <a href="https://www.genecards.org/cgi-bin/carddisp.pl?gene=KCND3">https://www.genecards.org/cgi-bin/carddisp.pl?gene=KCND3</a>     |
| TOM1    | Target Of Myb1 Membrane Trafficking Protein                                            | Protein Coding | 49 | GC22P035299 | 1.60710144  | <a href="https://www.genecards.org/cgi-bin/carddisp.pl?gene=TOM1">https://www.genecards.org/cgi-bin/carddisp.pl?gene=TOM1</a>       |
| C2CD5   | C2 Calcium Dependent Domain Containing 5                                               | Protein Coding | 40 | GC12M022448 | 1.606956601 | <a href="https://www.genecards.org/cgi-bin/carddisp.pl?gene=C2CD5">https://www.genecards.org/cgi-bin/carddisp.pl?gene=C2CD5</a>     |
| TAC3    | Tachykinin Precursor 3                                                                 | Protein Coding | 50 | GC12M057108 | 1.605289936 | <a href="https://www.genecards.org/cgi-bin/carddisp.pl?gene=TAC3">https://www.genecards.org/cgi-bin/carddisp.pl?gene=TAC3</a>       |
| ERG     | ETS Transcription Factor ERG                                                           | Protein Coding | 53 | GC21M038367 | 1.603666306 | <a href="https://www.genecards.org/cgi-bin/carddisp.pl?gene=ERG">https://www.genecards.org/cgi-bin/carddisp.pl?gene=ERG</a>         |
| EN2     | Engrailed Homeobox 2                                                                   | Protein Coding | 46 | GC07P155459 | 1.602025986 | <a href="https://www.genecards.org/cgi-bin/carddisp.pl?gene=EN2">https://www.genecards.org/cgi-bin/carddisp.pl?gene=EN2</a>         |
| SAG     | S-Antigen Visual Arrestin                                                              | Protein Coding | 51 | GC02P233400 | 1.600292444 | <a href="https://www.genecards.org/cgi-bin/carddisp.pl?gene=SAG">https://www.genecards.org/cgi-bin/carddisp.pl?gene=SAG</a>         |
| KIR3DL1 | Killer Cell Immunoglobulin Like Receptor, Three Ig Domains And Long Cytoplasmic Tail 1 | Protein Coding | 46 | GC19P073503 | 1.599633932 | <a href="https://www.genecards.org/cgi-bin/carddisp.pl?gene=KIR3DL1">https://www.genecards.org/cgi-bin/carddisp.pl?gene=KIR3DL1</a> |
| CHRNA4  | Cholinergic Receptor Nicotinic Alpha 4 Subunit                                         | Protein Coding | 56 | GC20M063343 | 1.597695589 | <a href="https://www.genecards.org/cgi-bin/carddisp.pl?gene=CHRNA4">https://www.genecards.org/cgi-bin/carddisp.pl?gene=CHRNA4</a>   |
| CCL26   | C-C Motif Chemokine Ligand 26                                                          | Protein Coding | 44 | GC07M075769 | 1.596167326 | <a href="https://www.genecards.org/cgi-bin/carddisp.pl?gene=CCL26">https://www.genecards.org/cgi-bin/carddisp.pl?gene=CCL26</a>     |
| RNF41   | Ring Finger Protein 41                                                                 | Protein Coding | 46 | GC12M056202 | 1.593486309 | <a href="https://www.genecards.org/cgi-bin/carddisp.pl?gene=RNF41">https://www.genecards.org/cgi-bin/carddisp.pl?gene=RNF41</a>     |
| TLR5    | Toll Like Receptor 5                                                                   | Protein Coding | 53 | GC01M223109 | 1.591864109 | <a href="https://www.genecards.org/cgi-bin/carddisp.pl?gene=TLR5">https://www.genecards.org/cgi-bin/carddisp.pl?gene=TLR5</a>       |
| PI3     | Peptidase Inhibitor 3                                                                  | Protein Coding | 44 | GC20P045174 | 1.590837479 | <a href="https://www.genecards.org/cgi-bin/carddisp.pl?gene=PI3">https://www.genecards.org/cgi-bin/carddisp.pl?gene=PI3</a>         |

|         |                                                  |                |    |             |             |                                                                                                                                     |
|---------|--------------------------------------------------|----------------|----|-------------|-------------|-------------------------------------------------------------------------------------------------------------------------------------|
| CD209   | CD209 Molecule                                   | Protein Coding | 50 | GC19M007739 | 1.590370893 | <a href="https://www.genecards.org/cgi-bin/carddisp.pl?gene=CD209">https://www.genecards.org/cgi-bin/carddisp.pl?gene=CD209</a>     |
| MVP     | Major Vault Protein                              | Protein Coding | 47 | GC16P042738 | 1.587863684 | <a href="https://www.genecards.org/cgi-bin/carddisp.pl?gene=MVP">https://www.genecards.org/cgi-bin/carddisp.pl?gene=MVP</a>         |
| REG1A   | Regenerating Family Member 1 Alpha               | Protein Coding | 46 | GC02P079120 | 1.587365627 | <a href="https://www.genecards.org/cgi-bin/carddisp.pl?gene=REG1A">https://www.genecards.org/cgi-bin/carddisp.pl?gene=REG1A</a>     |
| TDP1    | Tyrosyl-DNA Phosphodiesterase 1                  | Protein Coding | 51 | GC14P089954 | 1.585007429 | <a href="https://www.genecards.org/cgi-bin/carddisp.pl?gene=TDP1">https://www.genecards.org/cgi-bin/carddisp.pl?gene=TDP1</a>       |
| CHRNA1  | Cholinergic Receptor Nicotinic Alpha 1 Subunit   | Protein Coding | 52 | GC02M174747 | 1.583951354 | <a href="https://www.genecards.org/cgi-bin/carddisp.pl?gene=CHRNA1">https://www.genecards.org/cgi-bin/carddisp.pl?gene=CHRNA1</a>   |
| ANP32A  | Acidic Nuclear Phosphoprotein 32 Family Member A | Protein Coding | 50 | GC15M068778 | 1.581532955 | <a href="https://www.genecards.org/cgi-bin/carddisp.pl?gene=ANP32A">https://www.genecards.org/cgi-bin/carddisp.pl?gene=ANP32A</a>   |
| GAP43   | Growth Associated Protein 43                     | Protein Coding | 50 | GC03P115623 | 1.578776121 | <a href="https://www.genecards.org/cgi-bin/carddisp.pl?gene=GAP43">https://www.genecards.org/cgi-bin/carddisp.pl?gene=GAP43</a>     |
| RBM14   | RNA Binding Motif Protein 14                     | Protein Coding | 45 | GC11P070979 | 1.578552961 | <a href="https://www.genecards.org/cgi-bin/carddisp.pl?gene=RBM14">https://www.genecards.org/cgi-bin/carddisp.pl?gene=RBM14</a>     |
| CSTA    | Cystatin A                                       | Protein Coding | 51 | GC03P122325 | 1.577850103 | <a href="https://www.genecards.org/cgi-bin/carddisp.pl?gene=CSTA">https://www.genecards.org/cgi-bin/carddisp.pl?gene=CSTA</a>       |
| LMTK3   | Lemur Tyrosine Kinase 3                          | Protein Coding | 42 | GC19M048485 | 1.575712204 | <a href="https://www.genecards.org/cgi-bin/carddisp.pl?gene=LMTK3">https://www.genecards.org/cgi-bin/carddisp.pl?gene=LMTK3</a>     |
| SH3KBP1 | SH3 Domain Containing Kinase Binding Protein 1   | Protein Coding | 48 | GC0XM019552 | 1.574989557 | <a href="https://www.genecards.org/cgi-bin/carddisp.pl?gene=SH3KBP1">https://www.genecards.org/cgi-bin/carddisp.pl?gene=SH3KBP1</a> |
| SLIT3   | Slit Guidance Ligand 3                           | Protein Coding | 48 | GC05M168661 | 1.573313236 | <a href="https://www.genecards.org/cgi-bin/carddisp.pl?gene=SLIT3">https://www.genecards.org/cgi-bin/carddisp.pl?gene=SLIT3</a>     |
| WAS     | WASP Actin Nucleation Promoting Factor           | Protein Coding | 55 | GC0XP048676 | 1.572755575 | <a href="https://www.genecards.org/cgi-bin/carddisp.pl?gene=WAS">https://www.genecards.org/cgi-bin/carddisp.pl?gene=WAS</a>         |
| FCGR2B  | Fc Gamma Receptor IIb                            | Protein Coding | 56 | GC01P161823 | 1.570428848 | <a href="https://www.genecards.org/cgi-bin/carddisp.pl?gene=FCGR2B">https://www.genecards.org/cgi-bin/carddisp.pl?gene=FCGR2B</a>   |
| PTPRU   | Protein Tyrosine Phosphatase Receptor Type U     | Protein Coding | 50 | GC01P029236 | 1.567531228 | <a href="https://www.genecards.org/cgi-bin/carddisp.pl?gene=PTPRU">https://www.genecards.org/cgi-bin/carddisp.pl?gene=PTPRU</a>     |



|         |                                                                  |                |    |             |             |                                                                                                                                     |
|---------|------------------------------------------------------------------|----------------|----|-------------|-------------|-------------------------------------------------------------------------------------------------------------------------------------|
| ITSN1   | Intersectin 1                                                    | Protein Coding | 48 | GC21P033642 | 1.564399242 | <a href="https://www.genecards.org/cgi-bin/carddisp.pl?gene=ITSN1">https://www.genecards.org/cgi-bin/carddisp.pl?gene=ITSN1</a>     |
| ABI2    | Abl Interactor 2                                                 | Protein Coding | 45 | GC02P203327 | 1.561905265 | <a href="https://www.genecards.org/cgi-bin/carddisp.pl?gene=ABI2">https://www.genecards.org/cgi-bin/carddisp.pl?gene=ABI2</a>       |
| VAV1    | Vav Guanine Nucleotide Exchange Factor 1                         | Protein Coding | 52 | GC19P006772 | 1.559613466 | <a href="https://www.genecards.org/cgi-bin/carddisp.pl?gene=VAV1">https://www.genecards.org/cgi-bin/carddisp.pl?gene=VAV1</a>       |
| BCL3    | BCL3 Transcription Coactivator                                   | Protein Coding | 48 | GC19P044747 | 1.558552265 | <a href="https://www.genecards.org/cgi-bin/carddisp.pl?gene=BCL3">https://www.genecards.org/cgi-bin/carddisp.pl?gene=BCL3</a>       |
| STATH   | Statherin                                                        | Protein Coding | 38 | GC04P069995 | 1.558440924 | <a href="https://www.genecards.org/cgi-bin/carddisp.pl?gene=STATH">https://www.genecards.org/cgi-bin/carddisp.pl?gene=STATH</a>     |
| TOLLIP  | Toll Interacting Protein                                         | Protein Coding | 51 | GC11M001274 | 1.555968523 | <a href="https://www.genecards.org/cgi-bin/carddisp.pl?gene=TOLLIP">https://www.genecards.org/cgi-bin/carddisp.pl?gene=TOLLIP</a>   |
| IL22RA2 | Interleukin 22 Receptor Subunit Alpha 2                          | Protein Coding | 47 | GC06M137143 | 1.553938866 | <a href="https://www.genecards.org/cgi-bin/carddisp.pl?gene=IL22RA2">https://www.genecards.org/cgi-bin/carddisp.pl?gene=IL22RA2</a> |
| THBS4   | Thrombospondin 4                                                 | Protein Coding | 50 | GC05P079991 | 1.549686193 | <a href="https://www.genecards.org/cgi-bin/carddisp.pl?gene=THBS4">https://www.genecards.org/cgi-bin/carddisp.pl?gene=THBS4</a>     |
| TRPA1   | Transient Receptor Potential Cation Channel Subfamily A Member 1 | Protein Coding | 53 | GC08M072019 | 1.548540115 | <a href="https://www.genecards.org/cgi-bin/carddisp.pl?gene=TRPA1">https://www.genecards.org/cgi-bin/carddisp.pl?gene=TRPA1</a>     |
| S100A10 | S100 Calcium Binding Protein A10                                 | Protein Coding | 50 | GC01M152817 | 1.548104286 | <a href="https://www.genecards.org/cgi-bin/carddisp.pl?gene=S100A10">https://www.genecards.org/cgi-bin/carddisp.pl?gene=S100A10</a> |
| ABL2    | ABL Proto-Oncogene 2, Non-Receptor Tyrosine Kinase               | Protein Coding | 52 | GC01M179143 | 1.548074484 | <a href="https://www.genecards.org/cgi-bin/carddisp.pl?gene=ABL2">https://www.genecards.org/cgi-bin/carddisp.pl?gene=ABL2</a>       |
| PIGF    | Phosphatidylinositol Glycan Anchor Biosynthesis Class F          | Protein Coding | 46 | GC02M046580 | 1.547854424 | <a href="https://www.genecards.org/cgi-bin/carddisp.pl?gene=PIGF">https://www.genecards.org/cgi-bin/carddisp.pl?gene=PIGF</a>       |
| EGR2    | Early Growth Response 2                                          | Protein Coding | 51 | GC10M062811 | 1.542626143 | <a href="https://www.genecards.org/cgi-bin/carddisp.pl?gene=EGR2">https://www.genecards.org/cgi-bin/carddisp.pl?gene=EGR2</a>       |
| ZKSCAN7 | Zinc Finger With KRAB And SCAN Domains 7                         | Protein Coding | 39 | GC03P044556 | 1.539433479 | <a href="https://www.genecards.org/cgi-bin/carddisp.pl?gene=ZKSCAN7">https://www.genecards.org/cgi-bin/carddisp.pl?gene=ZKSCAN7</a> |
| CHRND   | Cholinergic Receptor Nicotinic Delta Subunit                     | Protein Coding | 50 | GC02P232525 | 1.539049506 | <a href="https://www.genecards.org/cgi-bin/carddisp.pl?gene=CHRND">https://www.genecards.org/cgi-bin/carddisp.pl?gene=CHRND</a>     |

|         |                                                  |                |    |             |             |                                                                                                                                     |
|---------|--------------------------------------------------|----------------|----|-------------|-------------|-------------------------------------------------------------------------------------------------------------------------------------|
| ELP3    | Elongator Acetyltransferase Complex Subunit 3    | Protein Coding | 48 | GC08P028089 | 1.538787603 | <a href="https://www.genecards.org/cgi-bin/carddisp.pl?gene=ELP3">https://www.genecards.org/cgi-bin/carddisp.pl?gene=ELP3</a>       |
| FCER1G  | Fc Epsilon Receptor Ig                           | Protein Coding | 48 | GC01P161215 | 1.535698891 | <a href="https://www.genecards.org/cgi-bin/carddisp.pl?gene=FCER1G">https://www.genecards.org/cgi-bin/carddisp.pl?gene=FCER1G</a>   |
| SHB     | SH2 Domain Containing Adaptor Protein B          | Protein Coding | 46 | GC09M040554 | 1.535517454 | <a href="https://www.genecards.org/cgi-bin/carddisp.pl?gene=SHB">https://www.genecards.org/cgi-bin/carddisp.pl?gene=SHB</a>         |
| MSBP2   | Minisatellite Binding Protein 2                  | Protein Coding | 5  | GC00U990214 | 1.533616304 | <a href="https://www.genecards.org/cgi-bin/carddisp.pl?gene=MSBP2">https://www.genecards.org/cgi-bin/carddisp.pl?gene=MSBP2</a>     |
| WNT11   | Wnt Family Member 11                             | Protein Coding | 50 | GC11M076186 | 1.532100201 | <a href="https://www.genecards.org/cgi-bin/carddisp.pl?gene=WNT11">https://www.genecards.org/cgi-bin/carddisp.pl?gene=WNT11</a>     |
| TBXT    | T-Box Transcription Factor T                     | Protein Coding | 50 | GC06M166158 | 1.531953096 | <a href="https://www.genecards.org/cgi-bin/carddisp.pl?gene=TBXT">https://www.genecards.org/cgi-bin/carddisp.pl?gene=TBXT</a>       |
| MAP3K2  | Mitogen-Activated Protein Kinase Kinase Kinase 2 | Protein Coding | 52 | GC02M127298 | 1.531584501 | <a href="https://www.genecards.org/cgi-bin/carddisp.pl?gene=MAP3K2">https://www.genecards.org/cgi-bin/carddisp.pl?gene=MAP3K2</a>   |
| FGFRL1  | Fibroblast Growth Factor Receptor Like 1         | Protein Coding | 50 | GC04P001370 | 1.53033185  | <a href="https://www.genecards.org/cgi-bin/carddisp.pl?gene=FGFRL1">https://www.genecards.org/cgi-bin/carddisp.pl?gene=FGFRL1</a>   |
| CLEC12A | C-Type Lectin Domain Family 12 Member A          | Protein Coding | 46 | GC12P009951 | 1.528077364 | <a href="https://www.genecards.org/cgi-bin/carddisp.pl?gene=CLEC12A">https://www.genecards.org/cgi-bin/carddisp.pl?gene=CLEC12A</a> |
| PTPN9   | Protein Tyrosine Phosphatase Non-Receptor Type 9 | Protein Coding | 46 | GC15M075463 | 1.525749922 | <a href="https://www.genecards.org/cgi-bin/carddisp.pl?gene=PTPN9">https://www.genecards.org/cgi-bin/carddisp.pl?gene=PTPN9</a>     |
| BAIAP2  | BAR/IMD Domain Containing Adaptor Protein 2      | Protein Coding | 48 | GC17P081035 | 1.525718451 | <a href="https://www.genecards.org/cgi-bin/carddisp.pl?gene=BAIAP2">https://www.genecards.org/cgi-bin/carddisp.pl?gene=BAIAP2</a>   |
| CA11    | Carbonic Anhydrase 11                            | Protein Coding | 44 | GC19M070852 | 1.523382664 | <a href="https://www.genecards.org/cgi-bin/carddisp.pl?gene=CA11">https://www.genecards.org/cgi-bin/carddisp.pl?gene=CA11</a>       |
| JPH4    | Junctophilin 4                                   | Protein Coding | 41 | GC14M023568 | 1.521375775 | <a href="https://www.genecards.org/cgi-bin/carddisp.pl?gene=JPH4">https://www.genecards.org/cgi-bin/carddisp.pl?gene=JPH4</a>       |
| GCAT    | Glycine C-Acetyltransferase                      | Protein Coding | 47 | GC22P037807 | 1.521194458 | <a href="https://www.genecards.org/cgi-bin/carddisp.pl?gene=GCAT">https://www.genecards.org/cgi-bin/carddisp.pl?gene=GCAT</a>       |
| PMP22   | Peripheral Myelin Protein 22                     | Protein Coding | 50 | GC17M015229 | 1.517963052 | <a href="https://www.genecards.org/cgi-bin/carddisp.pl?gene=PMP22">https://www.genecards.org/cgi-bin/carddisp.pl?gene=PMP22</a>     |

|        |                                               |                |    |             |             |                                                                                                                                   |
|--------|-----------------------------------------------|----------------|----|-------------|-------------|-----------------------------------------------------------------------------------------------------------------------------------|
| MUC4   | Mucin 4, Cell Surface Associated              | Protein Coding | 47 | GC03M195746 | 1.517698765 | <a href="https://www.genecards.org/cgi-bin/carddisp.pl?gene=MUC4">https://www.genecards.org/cgi-bin/carddisp.pl?gene=MUC4</a>     |
| GAB1   | GRB2 Associated Binding Protein 1             | Protein Coding | 51 | GC04P143336 | 1.514995813 | <a href="https://www.genecards.org/cgi-bin/carddisp.pl?gene=GAB1">https://www.genecards.org/cgi-bin/carddisp.pl?gene=GAB1</a>     |
| FRS2   | Fibroblast Growth Factor Receptor Substrate 2 | Protein Coding | 46 | GC12P069471 | 1.51312685  | <a href="https://www.genecards.org/cgi-bin/carddisp.pl?gene=FRS2">https://www.genecards.org/cgi-bin/carddisp.pl?gene=FRS2</a>     |
| SV2A   | Synaptic Vesicle Glycoprotein 2A              | Protein Coding | 50 | GC01M149903 | 1.510024309 | <a href="https://www.genecards.org/cgi-bin/carddisp.pl?gene=SV2A">https://www.genecards.org/cgi-bin/carddisp.pl?gene=SV2A</a>     |
| MATK   | Megakaryocyte-Associated Tyrosine Kinase      | Protein Coding | 51 | GC19M003777 | 1.509203672 | <a href="https://www.genecards.org/cgi-bin/carddisp.pl?gene=MATK">https://www.genecards.org/cgi-bin/carddisp.pl?gene=MATK</a>     |
| ABI1   | Abl Interactor 1                              | Protein Coding | 50 | GC10M026746 | 1.507948875 | <a href="https://www.genecards.org/cgi-bin/carddisp.pl?gene=ABI1">https://www.genecards.org/cgi-bin/carddisp.pl?gene=ABI1</a>     |
| SCYL1  | SCY1 Like Pseudokinase 1                      | Protein Coding | 49 | GC11P065525 | 1.507302999 | <a href="https://www.genecards.org/cgi-bin/carddisp.pl?gene=SCYL1">https://www.genecards.org/cgi-bin/carddisp.pl?gene=SCYL1</a>   |
| CD22   | CD22 Molecule                                 | Protein Coding | 53 | GC19P035319 | 1.507148862 | <a href="https://www.genecards.org/cgi-bin/carddisp.pl?gene=CD22">https://www.genecards.org/cgi-bin/carddisp.pl?gene=CD22</a>     |
| SNX9   | Sorting Nexin 9                               | Protein Coding | 47 | GC06P157702 | 1.507115602 | <a href="https://www.genecards.org/cgi-bin/carddisp.pl?gene=SNX9">https://www.genecards.org/cgi-bin/carddisp.pl?gene=SNX9</a>     |
| ZYX    | Zyxin                                         | Protein Coding | 52 | GC07P143381 | 1.506281376 | <a href="https://www.genecards.org/cgi-bin/carddisp.pl?gene=ZYX">https://www.genecards.org/cgi-bin/carddisp.pl?gene=ZYX</a>       |
| DUSP13 | Dual Specificity Phosphatase 13               | Protein Coding | 45 | GC10M075094 | 1.505273819 | <a href="https://www.genecards.org/cgi-bin/carddisp.pl?gene=DUSP13">https://www.genecards.org/cgi-bin/carddisp.pl?gene=DUSP13</a> |
| PDPN   | Podoplanin                                    | Protein Coding | 48 | GC01P013583 | 1.504307032 | <a href="https://www.genecards.org/cgi-bin/carddisp.pl?gene=PDPN">https://www.genecards.org/cgi-bin/carddisp.pl?gene=PDPN</a>     |
| FKBP5  | FKBP Prolyl Isomerase 5                       | Protein Coding | 56 | GC06M071862 | 1.503385782 | <a href="https://www.genecards.org/cgi-bin/carddisp.pl?gene=FKBP5">https://www.genecards.org/cgi-bin/carddisp.pl?gene=FKBP5</a>   |
| HECTD2 | HECT Domain E3 Ubiquitin Protein Ligase 2     | Protein Coding | 42 | GC10P091409 | 1.502227306 | <a href="https://www.genecards.org/cgi-bin/carddisp.pl?gene=HECTD2">https://www.genecards.org/cgi-bin/carddisp.pl?gene=HECTD2</a> |
| SPN    | Sialophorin                                   | Protein Coding | 47 | GC16P029662 | 1.501608849 | <a href="https://www.genecards.org/cgi-bin/carddisp.pl?gene=SPN">https://www.genecards.org/cgi-bin/carddisp.pl?gene=SPN</a>       |

|         |                                                        |                |    |             |             |                                                                                                                                     |
|---------|--------------------------------------------------------|----------------|----|-------------|-------------|-------------------------------------------------------------------------------------------------------------------------------------|
| TNR     | Tenascin R                                             | Protein Coding | 50 | GC01M175291 | 1.499696016 | <a href="https://www.genecards.org/cgi-bin/carddisp.pl?gene=TNR">https://www.genecards.org/cgi-bin/carddisp.pl?gene=TNR</a>         |
| KTI12   | KTI12 Chromatin Associated Homolog                     | Protein Coding | 36 | GC01M052032 | 1.497702956 | <a href="https://www.genecards.org/cgi-bin/carddisp.pl?gene=KTI12">https://www.genecards.org/cgi-bin/carddisp.pl?gene=KTI12</a>     |
| MED30   | Mediator Complex Subunit 30                            | Protein Coding | 43 | GC08P117521 | 1.497054815 | <a href="https://www.genecards.org/cgi-bin/carddisp.pl?gene=MED30">https://www.genecards.org/cgi-bin/carddisp.pl?gene=MED30</a>     |
| RNASE1  | Ribonuclease A Family Member 1, Pancreatic             | Protein Coding | 48 | GC14M020801 | 1.49683392  | <a href="https://www.genecards.org/cgi-bin/carddisp.pl?gene=RNASE1">https://www.genecards.org/cgi-bin/carddisp.pl?gene=RNASE1</a>   |
| P2RX3   | Purinergic Receptor P2X 3                              | Protein Coding | 50 | GC11P057356 | 1.494965792 | <a href="https://www.genecards.org/cgi-bin/carddisp.pl?gene=P2RX3">https://www.genecards.org/cgi-bin/carddisp.pl?gene=P2RX3</a>     |
| FYB1    | FYN Binding Protein 1                                  | Protein Coding | 50 | GC05M039105 | 1.491333246 | <a href="https://www.genecards.org/cgi-bin/carddisp.pl?gene=FYB1">https://www.genecards.org/cgi-bin/carddisp.pl?gene=FYB1</a>       |
| TGFB111 | Transforming Growth Factor Beta 1 Induced Transcript 1 | Protein Coding | 48 | GC16P042867 | 1.490437984 | <a href="https://www.genecards.org/cgi-bin/carddisp.pl?gene=TGFB111">https://www.genecards.org/cgi-bin/carddisp.pl?gene=TGFB111</a> |
| ACKR1   | Atypical Chemokine Receptor 1 (Duffy Blood Group)      | Protein Coding | 48 | GC01P159203 | 1.488973379 | <a href="https://www.genecards.org/cgi-bin/carddisp.pl?gene=ACKR1">https://www.genecards.org/cgi-bin/carddisp.pl?gene=ACKR1</a>     |
| PTK7    | Protein Tyrosine Kinase 7 (Inactive)                   | Protein Coding | 52 | GC06P043076 | 1.488434076 | <a href="https://www.genecards.org/cgi-bin/carddisp.pl?gene=PTK7">https://www.genecards.org/cgi-bin/carddisp.pl?gene=PTK7</a>       |
| CHRNA2  | Cholinergic Receptor Nicotinic Beta 2 Subunit          | Protein Coding | 53 | GC01P154568 | 1.48781085  | <a href="https://www.genecards.org/cgi-bin/carddisp.pl?gene=CHRNA2">https://www.genecards.org/cgi-bin/carddisp.pl?gene=CHRNA2</a>   |
| CTSW    | Cathepsin W                                            | Protein Coding | 43 | GC11P065879 | 1.486487627 | <a href="https://www.genecards.org/cgi-bin/carddisp.pl?gene=CTSW">https://www.genecards.org/cgi-bin/carddisp.pl?gene=CTSW</a>       |
| CCR4    | C-C Motif Chemokine Receptor 4                         | Protein Coding | 51 | GC03P032951 | 1.486412525 | <a href="https://www.genecards.org/cgi-bin/carddisp.pl?gene=CCR4">https://www.genecards.org/cgi-bin/carddisp.pl?gene=CCR4</a>       |
| TRIP6   | Thyroid Hormone Receptor Interactor 6                  | Protein Coding | 46 | GC07P100867 | 1.486283898 | <a href="https://www.genecards.org/cgi-bin/carddisp.pl?gene=TRIP6">https://www.genecards.org/cgi-bin/carddisp.pl?gene=TRIP6</a>     |
| MPP1    | MAGUK P55 Scaffold Protein 1                           | Protein Coding | 46 | GC0XM154779 | 1.485907793 | <a href="https://www.genecards.org/cgi-bin/carddisp.pl?gene=MPP1">https://www.genecards.org/cgi-bin/carddisp.pl?gene=MPP1</a>       |
| GLRA1   | Glycine Receptor Alpha 1                               | Protein Coding | 53 | GC05M151822 | 1.483913183 | <a href="https://www.genecards.org/cgi-bin/carddisp.pl?gene=GLRA1">https://www.genecards.org/cgi-bin/carddisp.pl?gene=GLRA1</a>     |

|         |                                                         |                |    |             |             |                                                                                                                                     |
|---------|---------------------------------------------------------|----------------|----|-------------|-------------|-------------------------------------------------------------------------------------------------------------------------------------|
| EIF4H   | Eukaryotic Translation Initiation Factor 4H             | Protein Coding | 48 | GC07P074174 | 1.483606577 | <a href="https://www.genecards.org/cgi-bin/carddisp.pl?gene=EIF4H">https://www.genecards.org/cgi-bin/carddisp.pl?gene=EIF4H</a>     |
| HDAC8   | Histone Deacetylase 8                                   | Protein Coding | 55 | GC0XM072329 | 1.483047009 | <a href="https://www.genecards.org/cgi-bin/carddisp.pl?gene=HDAC8">https://www.genecards.org/cgi-bin/carddisp.pl?gene=HDAC8</a>     |
| MAP4K2  | Mitogen-Activated Protein Kinase Kinase Kinase Kinase 2 | Protein Coding | 53 | GC11M099661 | 1.471613169 | <a href="https://www.genecards.org/cgi-bin/carddisp.pl?gene=MAP4K2">https://www.genecards.org/cgi-bin/carddisp.pl?gene=MAP4K2</a>   |
| MRPL28  | Mitochondrial Ribosomal Protein L28                     | Protein Coding | 43 | GC16M000366 | 1.47159481  | <a href="https://www.genecards.org/cgi-bin/carddisp.pl?gene=MRPL28">https://www.genecards.org/cgi-bin/carddisp.pl?gene=MRPL28</a>   |
| AQP5    | Aquaporin 5                                             | Protein Coding | 53 | GC12P049961 | 1.471539617 | <a href="https://www.genecards.org/cgi-bin/carddisp.pl?gene=AQP5">https://www.genecards.org/cgi-bin/carddisp.pl?gene=AQP5</a>       |
| PPP2R3A | Protein Phosphatase 2 Regulatory Subunit B"Alpha        | Protein Coding | 43 | GC03P135965 | 1.46496439  | <a href="https://www.genecards.org/cgi-bin/carddisp.pl?gene=PPP2R3A">https://www.genecards.org/cgi-bin/carddisp.pl?gene=PPP2R3A</a> |
| TRIM22  | Tripartite Motif Containing 22                          | Protein Coding | 46 | GC11P005689 | 1.461960793 | <a href="https://www.genecards.org/cgi-bin/carddisp.pl?gene=TRIM22">https://www.genecards.org/cgi-bin/carddisp.pl?gene=TRIM22</a>   |
| SIT1    | Signaling Threshold Regulating Transmembrane Adaptor 1  | Protein Coding | 43 | GC09M035640 | 1.460095882 | <a href="https://www.genecards.org/cgi-bin/carddisp.pl?gene=SIT1">https://www.genecards.org/cgi-bin/carddisp.pl?gene=SIT1</a>       |
| PDIA2   | Protein Disulfide Isomerase Family A Member 2           | Protein Coding | 48 | GC16P013436 | 1.459900379 | <a href="https://www.genecards.org/cgi-bin/carddisp.pl?gene=PDIA2">https://www.genecards.org/cgi-bin/carddisp.pl?gene=PDIA2</a>     |
| ETV1    | ETS Variant Transcription Factor 1                      | Protein Coding | 51 | GC07M013891 | 1.45987165  | <a href="https://www.genecards.org/cgi-bin/carddisp.pl?gene=ETV1">https://www.genecards.org/cgi-bin/carddisp.pl?gene=ETV1</a>       |
| VEGFD   | Vascular Endothelial Growth Factor D                    | Protein Coding | 47 | GC0XM015345 | 1.458869696 | <a href="https://www.genecards.org/cgi-bin/carddisp.pl?gene=VEGFD">https://www.genecards.org/cgi-bin/carddisp.pl?gene=VEGFD</a>     |
| LRIG1   | Leucine Rich Repeats And Immunoglobulin Like Domains 1  | Protein Coding | 49 | GC03M066379 | 1.458433747 | <a href="https://www.genecards.org/cgi-bin/carddisp.pl?gene=LRIG1">https://www.genecards.org/cgi-bin/carddisp.pl?gene=LRIG1</a>     |
| ACTR3   | Actin Related Protein 3                                 | Protein Coding | 47 | GC02P113889 | 1.458372474 | <a href="https://www.genecards.org/cgi-bin/carddisp.pl?gene=ACTR3">https://www.genecards.org/cgi-bin/carddisp.pl?gene=ACTR3</a>     |
| PTPRK   | Protein Tyrosine Phosphatase Receptor Type K            | Protein Coding | 51 | GC06M127949 | 1.45528698  | <a href="https://www.genecards.org/cgi-bin/carddisp.pl?gene=PTPRK">https://www.genecards.org/cgi-bin/carddisp.pl?gene=PTPRK</a>     |
| DCTN2   | Dynactin Subunit 2                                      | Protein Coding | 47 | GC12M057771 | 1.454296112 | <a href="https://www.genecards.org/cgi-bin/carddisp.pl?gene=DCTN2">https://www.genecards.org/cgi-bin/carddisp.pl?gene=DCTN2</a>     |

|         |                                                      |                |    |             |             |                                                                                                                                     |
|---------|------------------------------------------------------|----------------|----|-------------|-------------|-------------------------------------------------------------------------------------------------------------------------------------|
| TDGF1   | Teratocarcinoma-Derived Growth Factor 1              | Protein Coding | 49 | GC03P047633 | 1.454260468 | <a href="https://www.genecards.org/cgi-bin/carddisp.pl?gene=TDGF1">https://www.genecards.org/cgi-bin/carddisp.pl?gene=TDGF1</a>     |
| TEC     | Tec Protein Tyrosine Kinase                          | Protein Coding | 52 | GC04M048177 | 1.453444481 | <a href="https://www.genecards.org/cgi-bin/carddisp.pl?gene=TEC">https://www.genecards.org/cgi-bin/carddisp.pl?gene=TEC</a>         |
| EIF3B   | Eukaryotic Translation Initiation Factor 3 Subunit B | Protein Coding | 45 | GC07P002354 | 1.452422142 | <a href="https://www.genecards.org/cgi-bin/carddisp.pl?gene=EIF3B">https://www.genecards.org/cgi-bin/carddisp.pl?gene=EIF3B</a>     |
| NRGN    | Neurogranin                                          | Protein Coding | 44 | GC11P124739 | 1.450027466 | <a href="https://www.genecards.org/cgi-bin/carddisp.pl?gene=NRGN">https://www.genecards.org/cgi-bin/carddisp.pl?gene=NRGN</a>       |
| FIP1L1  | Factor Interacting With PAPOLA And CPSF1             | Protein Coding | 47 | GC04P053435 | 1.449950576 | <a href="https://www.genecards.org/cgi-bin/carddisp.pl?gene=FIP1L1">https://www.genecards.org/cgi-bin/carddisp.pl?gene=FIP1L1</a>   |
| EFNA3   | Ephrin A3                                            | Protein Coding | 51 | GC01P155078 | 1.446974158 | <a href="https://www.genecards.org/cgi-bin/carddisp.pl?gene=EFNA3">https://www.genecards.org/cgi-bin/carddisp.pl?gene=EFNA3</a>     |
| GLI2    | GLI Family Zinc Finger 2                             | Protein Coding | 56 | GC02P120735 | 1.444097519 | <a href="https://www.genecards.org/cgi-bin/carddisp.pl?gene=GLI2">https://www.genecards.org/cgi-bin/carddisp.pl?gene=GLI2</a>       |
| CIT     | Citron Rho-Interacting Serine/Threonine Kinase       | Protein Coding | 54 | GC12M119687 | 1.443084955 | <a href="https://www.genecards.org/cgi-bin/carddisp.pl?gene=CIT">https://www.genecards.org/cgi-bin/carddisp.pl?gene=CIT</a>         |
| KIFAP3  | Kinesin Associated Protein 3                         | Protein Coding | 46 | GC01M169921 | 1.442029834 | <a href="https://www.genecards.org/cgi-bin/carddisp.pl?gene=KIFAP3">https://www.genecards.org/cgi-bin/carddisp.pl?gene=KIFAP3</a>   |
| GJB2    | Gap Junction Protein Beta 2                          | Protein Coding | 52 | GC13M020187 | 1.441787243 | <a href="https://www.genecards.org/cgi-bin/carddisp.pl?gene=GJB2">https://www.genecards.org/cgi-bin/carddisp.pl?gene=GJB2</a>       |
| KAT7    | Lysine Acetyltransferase 7                           | Protein Coding | 49 | GC17P049788 | 1.440423012 | <a href="https://www.genecards.org/cgi-bin/carddisp.pl?gene=KAT7">https://www.genecards.org/cgi-bin/carddisp.pl?gene=KAT7</a>       |
| DOK1    | Docking Protein 1                                    | Protein Coding | 50 | GC02P074549 | 1.440416574 | <a href="https://www.genecards.org/cgi-bin/carddisp.pl?gene=DOK1">https://www.genecards.org/cgi-bin/carddisp.pl?gene=DOK1</a>       |
| MIR26A2 | MicroRNA 26a-2                                       | RNA Gene       | 22 | GC12M057824 | 1.43974936  | <a href="https://www.genecards.org/cgi-bin/carddisp.pl?gene=MIR26A2">https://www.genecards.org/cgi-bin/carddisp.pl?gene=MIR26A2</a> |
| RDX     | Radixin                                              | Protein Coding | 53 | GC11M109864 | 1.43893826  | <a href="https://www.genecards.org/cgi-bin/carddisp.pl?gene=RDX">https://www.genecards.org/cgi-bin/carddisp.pl?gene=RDX</a>         |
| CLUH    | Clustered Mitochondria Homolog                       | Protein Coding | 43 | GC17M002689 | 1.43893826  | <a href="https://www.genecards.org/cgi-bin/carddisp.pl?gene=CLUH">https://www.genecards.org/cgi-bin/carddisp.pl?gene=CLUH</a>       |

|       |                                                        |                |    |             |             |                                                                                                                                 |
|-------|--------------------------------------------------------|----------------|----|-------------|-------------|---------------------------------------------------------------------------------------------------------------------------------|
| PTPRG | Protein Tyrosine Phosphatase Receptor Type G           | Protein Coding | 51 | GC03P061561 | 1.437517405 | <a href="https://www.genecards.org/cgi-bin/carddisp.pl?gene=PTPRG">https://www.genecards.org/cgi-bin/carddisp.pl?gene=PTPRG</a> |
| TRMT6 | TRNA Methyltransferase 6 Non-Catalytic Subunit         | Protein Coding | 40 | GC20M005937 | 1.436141014 | <a href="https://www.genecards.org/cgi-bin/carddisp.pl?gene=TRMT6">https://www.genecards.org/cgi-bin/carddisp.pl?gene=TRMT6</a> |
| FOSB  | FosB Proto-Oncogene, AP-1 Transcription Factor Subunit | Protein Coding | 49 | GC19P045467 | 1.435516    | <a href="https://www.genecards.org/cgi-bin/carddisp.pl?gene=FOSB">https://www.genecards.org/cgi-bin/carddisp.pl?gene=FOSB</a>   |
| EFNA2 | Ephrin A2                                              | Protein Coding | 48 | GC19P003719 | 1.432334781 | <a href="https://www.genecards.org/cgi-bin/carddisp.pl?gene=EFNA2">https://www.genecards.org/cgi-bin/carddisp.pl?gene=EFNA2</a> |
| HEMK1 | HemK Methyltransferase Family Member 1                 | Protein Coding | 42 | GC03P050569 | 1.430846691 | <a href="https://www.genecards.org/cgi-bin/carddisp.pl?gene=HEMK1">https://www.genecards.org/cgi-bin/carddisp.pl?gene=HEMK1</a> |
| CLCF1 | Cardiotrophin Like Cytokine Factor 1                   | Protein Coding | 49 | GC11M067364 | 1.427292824 | <a href="https://www.genecards.org/cgi-bin/carddisp.pl?gene=CLCF1">https://www.genecards.org/cgi-bin/carddisp.pl?gene=CLCF1</a> |
| CEBPZ | CCAAT Enhancer Binding Protein Zeta                    | Protein Coding | 46 | GC02M037201 | 1.425809264 | <a href="https://www.genecards.org/cgi-bin/carddisp.pl?gene=CEBPZ">https://www.genecards.org/cgi-bin/carddisp.pl?gene=CEBPZ</a> |
| CRIP1 | Cysteine Rich Protein 1                                | Protein Coding | 43 | GC14P105486 | 1.425279856 | <a href="https://www.genecards.org/cgi-bin/carddisp.pl?gene=CRIP1">https://www.genecards.org/cgi-bin/carddisp.pl?gene=CRIP1</a> |
| ICAM2 | Intercellular Adhesion Molecule 2                      | Protein Coding | 51 | GC17M064002 | 1.424790382 | <a href="https://www.genecards.org/cgi-bin/carddisp.pl?gene=ICAM2">https://www.genecards.org/cgi-bin/carddisp.pl?gene=ICAM2</a> |
| PTK6  | Protein Tyrosine Kinase 6                              | Protein Coding | 54 | GC20M063528 | 1.424619913 | <a href="https://www.genecards.org/cgi-bin/carddisp.pl?gene=PTK6">https://www.genecards.org/cgi-bin/carddisp.pl?gene=PTK6</a>   |
| RGS19 | Regulator Of G Protein Signaling 19                    | Protein Coding | 48 | GC20M064073 | 1.423856258 | <a href="https://www.genecards.org/cgi-bin/carddisp.pl?gene=RGS19">https://www.genecards.org/cgi-bin/carddisp.pl?gene=RGS19</a> |
| CALD1 | Caldesmon 1                                            | Protein Coding | 50 | GC07P134744 | 1.423612356 | <a href="https://www.genecards.org/cgi-bin/carddisp.pl?gene=CALD1">https://www.genecards.org/cgi-bin/carddisp.pl?gene=CALD1</a> |
| CTRB1 | Chymotrypsinogen B1                                    | Protein Coding | 44 | GC16P075218 | 1.420039415 | <a href="https://www.genecards.org/cgi-bin/carddisp.pl?gene=CTRB1">https://www.genecards.org/cgi-bin/carddisp.pl?gene=CTRB1</a> |
| SIRPA | Signal Regulatory Protein Alpha                        | Protein Coding | 52 | GC20P001894 | 1.419333458 | <a href="https://www.genecards.org/cgi-bin/carddisp.pl?gene=SIRPA">https://www.genecards.org/cgi-bin/carddisp.pl?gene=SIRPA</a> |
| NDN   | Necdin, MAGE Family Member                             | Protein Coding | 48 | GC15M024541 | 1.415067673 | <a href="https://www.genecards.org/cgi-bin/carddisp.pl?gene=NDN">https://www.genecards.org/cgi-bin/carddisp.pl?gene=NDN</a>     |

|         |                                                |                |    |             |             |                                                                                                                                     |
|---------|------------------------------------------------|----------------|----|-------------|-------------|-------------------------------------------------------------------------------------------------------------------------------------|
| UBE2E2  | Ubiquitin Conjugating Enzyme E2 E2             | Protein Coding | 46 | GC03P023221 | 1.414947867 | <a href="https://www.genecards.org/cgi-bin/carddisp.pl?gene=UBE2E2">https://www.genecards.org/cgi-bin/carddisp.pl?gene=UBE2E2</a>   |
| CDY1    | Chromodomain Y-Linked 1                        | Protein Coding | 35 | GC0YP026181 | 1.41431427  | <a href="https://www.genecards.org/cgi-bin/carddisp.pl?gene=CDY1">https://www.genecards.org/cgi-bin/carddisp.pl?gene=CDY1</a>       |
| HECA    | Hdc Homolog, Cell Cycle Regulator              | Protein Coding | 39 | GC06P139135 | 1.412382364 | <a href="https://www.genecards.org/cgi-bin/carddisp.pl?gene=HECA">https://www.genecards.org/cgi-bin/carddisp.pl?gene=HECA</a>       |
| S1PR3   | Sphingosine-1-Phosphate Receptor 3             | Protein Coding | 52 | GC09P089518 | 1.411020994 | <a href="https://www.genecards.org/cgi-bin/carddisp.pl?gene=S1PR3">https://www.genecards.org/cgi-bin/carddisp.pl?gene=S1PR3</a>     |
| ID1     | Inhibitor Of DNA Binding 1                     | Protein Coding | 47 | GC20P031605 | 1.410467505 | <a href="https://www.genecards.org/cgi-bin/carddisp.pl?gene=ID1">https://www.genecards.org/cgi-bin/carddisp.pl?gene=ID1</a>         |
| SLC38A5 | Solute Carrier Family 38 Member 5              | Protein Coding | 44 | GC0XM048458 | 1.409354568 | <a href="https://www.genecards.org/cgi-bin/carddisp.pl?gene=SLC38A5">https://www.genecards.org/cgi-bin/carddisp.pl?gene=SLC38A5</a> |
| CCDC6   | Coiled-Coil Domain Containing 6                | Protein Coding | 47 | GC10M059788 | 1.406749368 | <a href="https://www.genecards.org/cgi-bin/carddisp.pl?gene=CCDC6">https://www.genecards.org/cgi-bin/carddisp.pl?gene=CCDC6</a>     |
| TIRAP   | TIR Domain Containing Adaptor Protein          | Protein Coding | 50 | GC11P126284 | 1.405854225 | <a href="https://www.genecards.org/cgi-bin/carddisp.pl?gene=TIRAP">https://www.genecards.org/cgi-bin/carddisp.pl?gene=TIRAP</a>     |
| ADAD1   | Adenosine Deaminase Domain Containing 1        | Protein Coding | 41 | GC04P122378 | 1.405854225 | <a href="https://www.genecards.org/cgi-bin/carddisp.pl?gene=ADAD1">https://www.genecards.org/cgi-bin/carddisp.pl?gene=ADAD1</a>     |
| GLYATL2 | Glycine-N-Acyltransferase Like 2               | Protein Coding | 38 | GC11M099448 | 1.405657053 | <a href="https://www.genecards.org/cgi-bin/carddisp.pl?gene=GLYATL2">https://www.genecards.org/cgi-bin/carddisp.pl?gene=GLYATL2</a> |
| GOLGA5  | Golgin A5                                      | Protein Coding | 44 | GC14P092794 | 1.404361129 | <a href="https://www.genecards.org/cgi-bin/carddisp.pl?gene=GOLGA5">https://www.genecards.org/cgi-bin/carddisp.pl?gene=GOLGA5</a>   |
| CXCL2   | C-X-C Motif Chemokine Ligand 2                 | Protein Coding | 46 | GC04M074097 | 1.401093721 | <a href="https://www.genecards.org/cgi-bin/carddisp.pl?gene=CXCL2">https://www.genecards.org/cgi-bin/carddisp.pl?gene=CXCL2</a>     |
| INSRR   | Insulin Receptor Related Receptor              | Protein Coding | 50 | GC01M156840 | 1.400798559 | <a href="https://www.genecards.org/cgi-bin/carddisp.pl?gene=INSRR">https://www.genecards.org/cgi-bin/carddisp.pl?gene=INSRR</a>     |
| UGT2A3  | UDP Glucuronosyltransferase Family 2 Member A3 | Protein Coding | 44 | GC04M068928 | 1.396822453 | <a href="https://www.genecards.org/cgi-bin/carddisp.pl?gene=UGT2A3">https://www.genecards.org/cgi-bin/carddisp.pl?gene=UGT2A3</a>   |
| GJB1    | Gap Junction Protein Beta 1                    | Protein Coding | 53 | GC0XP071212 | 1.396408558 | <a href="https://www.genecards.org/cgi-bin/carddisp.pl?gene=GJB1">https://www.genecards.org/cgi-bin/carddisp.pl?gene=GJB1</a>       |



|         |                                                 |                |    |             |             |                                                                                                                                     |
|---------|-------------------------------------------------|----------------|----|-------------|-------------|-------------------------------------------------------------------------------------------------------------------------------------|
| AZU1    | Azurocidin 1                                    | Protein Coding | 46 | GC19P000825 | 1.392551899 | <a href="https://www.genecards.org/cgi-bin/carddisp.pl?gene=AZU1">https://www.genecards.org/cgi-bin/carddisp.pl?gene=AZU1</a>       |
| LILRB2  | Leukocyte Immunoglobulin Like Receptor B2       | Protein Coding | 46 | GC19M071132 | 1.392198324 | <a href="https://www.genecards.org/cgi-bin/carddisp.pl?gene=LILRB2">https://www.genecards.org/cgi-bin/carddisp.pl?gene=LILRB2</a>   |
| PHOX2A  | Paired Like Homeobox 2A                         | Protein Coding | 48 | GC11M072239 | 1.391584873 | <a href="https://www.genecards.org/cgi-bin/carddisp.pl?gene=PHOX2A">https://www.genecards.org/cgi-bin/carddisp.pl?gene=PHOX2A</a>   |
| ADARB1  | Adenosine Deaminase RNA Specific B1             | Protein Coding | 51 | GC21P045073 | 1.391404986 | <a href="https://www.genecards.org/cgi-bin/carddisp.pl?gene=ADARB1">https://www.genecards.org/cgi-bin/carddisp.pl?gene=ADARB1</a>   |
| CD160   | CD160 Molecule                                  | Protein Coding | 48 | GC01P145719 | 1.386499882 | <a href="https://www.genecards.org/cgi-bin/carddisp.pl?gene=CD160">https://www.genecards.org/cgi-bin/carddisp.pl?gene=CD160</a>     |
| CD226   | CD226 Molecule                                  | Protein Coding | 48 | GC18M069831 | 1.386499882 | <a href="https://www.genecards.org/cgi-bin/carddisp.pl?gene=CD226">https://www.genecards.org/cgi-bin/carddisp.pl?gene=CD226</a>     |
| FLT3LG  | Fms Related Receptor Tyrosine Kinase 3 Ligand   | Protein Coding | 46 | GC19P073231 | 1.38465929  | <a href="https://www.genecards.org/cgi-bin/carddisp.pl?gene=FLT3LG">https://www.genecards.org/cgi-bin/carddisp.pl?gene=FLT3LG</a>   |
| SNX13   | Sorting Nexin 13                                | Protein Coding | 43 | GC07M017798 | 1.38465929  | <a href="https://www.genecards.org/cgi-bin/carddisp.pl?gene=SNX13">https://www.genecards.org/cgi-bin/carddisp.pl?gene=SNX13</a>     |
| PTPRH   | Protein Tyrosine Phosphatase Receptor Type H    | Protein Coding | 46 | GC19M055181 | 1.382741332 | <a href="https://www.genecards.org/cgi-bin/carddisp.pl?gene=PTPRH">https://www.genecards.org/cgi-bin/carddisp.pl?gene=PTPRH</a>     |
| CLDN4   | Claudin 4                                       | Protein Coding | 46 | GC07P073799 | 1.380390525 | <a href="https://www.genecards.org/cgi-bin/carddisp.pl?gene=CLDN4">https://www.genecards.org/cgi-bin/carddisp.pl?gene=CLDN4</a>     |
| GET1    | Guided Entry Of Tail-Anchored Proteins Factor 1 | Protein Coding | 41 | GC21P039377 | 1.379169941 | <a href="https://www.genecards.org/cgi-bin/carddisp.pl?gene=GET1">https://www.genecards.org/cgi-bin/carddisp.pl?gene=GET1</a>       |
| MFAP2   | Microfibril Associated Protein 2                | Protein Coding | 47 | GC01M016974 | 1.378049135 | <a href="https://www.genecards.org/cgi-bin/carddisp.pl?gene=MFAP2">https://www.genecards.org/cgi-bin/carddisp.pl?gene=MFAP2</a>     |
| CASQ2   | Calsequestrin 2                                 | Protein Coding | 51 | GC01M115700 | 1.377944827 | <a href="https://www.genecards.org/cgi-bin/carddisp.pl?gene=CASQ2">https://www.genecards.org/cgi-bin/carddisp.pl?gene=CASQ2</a>     |
| ANXA4   | Annexin A4                                      | Protein Coding | 48 | GC02P069644 | 1.377457976 | <a href="https://www.genecards.org/cgi-bin/carddisp.pl?gene=ANXA4">https://www.genecards.org/cgi-bin/carddisp.pl?gene=ANXA4</a>     |
| TMPRSS2 | Transmembrane Serine Protease 2                 | Protein Coding | 55 | GC21M041464 | 1.37644577  | <a href="https://www.genecards.org/cgi-bin/carddisp.pl?gene=TMPRSS2">https://www.genecards.org/cgi-bin/carddisp.pl?gene=TMPRSS2</a> |

|         |                                                              |                |    |             |             |                                                                                                                                     |
|---------|--------------------------------------------------------------|----------------|----|-------------|-------------|-------------------------------------------------------------------------------------------------------------------------------------|
| MYBL2   | MYB Proto-Oncogene Like 2                                    | Protein Coding | 49 | GC20P043667 | 1.375777125 | <a href="https://www.genecards.org/cgi-bin/carddisp.pl?gene=MYBL2">https://www.genecards.org/cgi-bin/carddisp.pl?gene=MYBL2</a>     |
| ERC1    | ELKS/RAB6-Interacting/CAST Family Member 1                   | Protein Coding | 48 | GC12P000972 | 1.375777125 | <a href="https://www.genecards.org/cgi-bin/carddisp.pl?gene=ERC1">https://www.genecards.org/cgi-bin/carddisp.pl?gene=ERC1</a>       |
| RASA2   | RAS P21 Protein Activator 2                                  | Protein Coding | 46 | GC03P141487 | 1.37325263  | <a href="https://www.genecards.org/cgi-bin/carddisp.pl?gene=RASA2">https://www.genecards.org/cgi-bin/carddisp.pl?gene=RASA2</a>     |
| CD244   | CD244 Molecule                                               | Protein Coding | 50 | GC01M160830 | 1.372381926 | <a href="https://www.genecards.org/cgi-bin/carddisp.pl?gene=CD244">https://www.genecards.org/cgi-bin/carddisp.pl?gene=CD244</a>     |
| GTF2B   | General Transcription Factor IIB                             | Protein Coding | 47 | GC01M088853 | 1.372071028 | <a href="https://www.genecards.org/cgi-bin/carddisp.pl?gene=GTF2B">https://www.genecards.org/cgi-bin/carddisp.pl?gene=GTF2B</a>     |
| GFRA1   | GDNF Family Receptor Alpha 1                                 | Protein Coding | 53 | GC10M116056 | 1.371281862 | <a href="https://www.genecards.org/cgi-bin/carddisp.pl?gene=GFRA1">https://www.genecards.org/cgi-bin/carddisp.pl?gene=GFRA1</a>     |
| BAG1    | BAG Cochaperone 1                                            | Protein Coding | 47 | GC09M033245 | 1.370138407 | <a href="https://www.genecards.org/cgi-bin/carddisp.pl?gene=BAG1">https://www.genecards.org/cgi-bin/carddisp.pl?gene=BAG1</a>       |
| CDC25B  | Cell Division Cycle 25B                                      | Protein Coding | 52 | GC20P004512 | 1.369985104 | <a href="https://www.genecards.org/cgi-bin/carddisp.pl?gene=CDC25B">https://www.genecards.org/cgi-bin/carddisp.pl?gene=CDC25B</a>   |
| DEFB4A  | Defensin Beta 4A                                             | Protein Coding | 42 | GC08P007900 | 1.367897034 | <a href="https://www.genecards.org/cgi-bin/carddisp.pl?gene=DEFB4A">https://www.genecards.org/cgi-bin/carddisp.pl?gene=DEFB4A</a>   |
| SPAG9   | Sperm Associated Antigen 9                                   | Protein Coding | 47 | GC17M050962 | 1.366934896 | <a href="https://www.genecards.org/cgi-bin/carddisp.pl?gene=SPAG9">https://www.genecards.org/cgi-bin/carddisp.pl?gene=SPAG9</a>     |
| ITGB5   | Integrin Subunit Beta 5                                      | Protein Coding | 53 | GC03M124761 | 1.364701748 | <a href="https://www.genecards.org/cgi-bin/carddisp.pl?gene=ITGB5">https://www.genecards.org/cgi-bin/carddisp.pl?gene=ITGB5</a>     |
| EPS15L1 | Epidermal Growth Factor Receptor Pathway Substrate 15 Like 1 | Protein Coding | 46 | GC19M016333 | 1.364116907 | <a href="https://www.genecards.org/cgi-bin/carddisp.pl?gene=EPS15L1">https://www.genecards.org/cgi-bin/carddisp.pl?gene=EPS15L1</a> |
| CTNNA1  | Catenin Alpha 1                                              | Protein Coding | 52 | GC05P138613 | 1.36270237  | <a href="https://www.genecards.org/cgi-bin/carddisp.pl?gene=CTNNA1">https://www.genecards.org/cgi-bin/carddisp.pl?gene=CTNNA1</a>   |
| TAGLN   | Transgelin                                                   | Protein Coding | 50 | GC11P117199 | 1.360505223 | <a href="https://www.genecards.org/cgi-bin/carddisp.pl?gene=TAGLN">https://www.genecards.org/cgi-bin/carddisp.pl?gene=TAGLN</a>     |
| ARHGDIB | Rho GDP Dissociation Inhibitor Beta                          | Protein Coding | 48 | GC12M014942 | 1.357345819 | <a href="https://www.genecards.org/cgi-bin/carddisp.pl?gene=ARHGDIB">https://www.genecards.org/cgi-bin/carddisp.pl?gene=ARHGDIB</a> |

|        |                                                     |                |    |             |             |                                                                                                                                   |
|--------|-----------------------------------------------------|----------------|----|-------------|-------------|-----------------------------------------------------------------------------------------------------------------------------------|
| MSMB   | Microseminoprotein Beta                             | Protein Coding | 47 | GC10M046033 | 1.356166363 | <a href="https://www.genecards.org/cgi-bin/carddisp.pl?gene=MSMB">https://www.genecards.org/cgi-bin/carddisp.pl?gene=MSMB</a>     |
| PTN    | Pleiotrophin                                        | Protein Coding | 47 | GC07M137227 | 1.355832815 | <a href="https://www.genecards.org/cgi-bin/carddisp.pl?gene=PTN">https://www.genecards.org/cgi-bin/carddisp.pl?gene=PTN</a>       |
| MEIS1  | Meis Homeobox 1                                     | Protein Coding | 48 | GC02P066433 | 1.35497427  | <a href="https://www.genecards.org/cgi-bin/carddisp.pl?gene=MEIS1">https://www.genecards.org/cgi-bin/carddisp.pl?gene=MEIS1</a>   |
| EPHA1  | EPH Receptor A1                                     | Protein Coding | 54 | GC07M143390 | 1.35342288  | <a href="https://www.genecards.org/cgi-bin/carddisp.pl?gene=EPHA1">https://www.genecards.org/cgi-bin/carddisp.pl?gene=EPHA1</a>   |
| YES1   | YES Proto-Oncogene 1, Src Family Tyrosine Kinase    | Protein Coding | 54 | GC18M000721 | 1.35342288  | <a href="https://www.genecards.org/cgi-bin/carddisp.pl?gene=YES1">https://www.genecards.org/cgi-bin/carddisp.pl?gene=YES1</a>     |
| LAIR1  | Leukocyte Associated Immunoglobulin Like Receptor 1 | Protein Coding | 48 | GC19M054351 | 1.353043079 | <a href="https://www.genecards.org/cgi-bin/carddisp.pl?gene=LAIR1">https://www.genecards.org/cgi-bin/carddisp.pl?gene=LAIR1</a>   |
| TFPT   | TCF3 Fusion Partner                                 | Protein Coding | 42 | GC19M054107 | 1.352261066 | <a href="https://www.genecards.org/cgi-bin/carddisp.pl?gene=TFPT">https://www.genecards.org/cgi-bin/carddisp.pl?gene=TFPT</a>     |
| SH2B2  | SH2B Adaptor Protein 2                              | Protein Coding | 44 | GC07P102286 | 1.35112071  | <a href="https://www.genecards.org/cgi-bin/carddisp.pl?gene=SH2B2">https://www.genecards.org/cgi-bin/carddisp.pl?gene=SH2B2</a>   |
| GRIN2C | Glutamate Ionotropic Receptor NMDA Type Subunit 2C  | Protein Coding | 52 | GC17M074842 | 1.350762725 | <a href="https://www.genecards.org/cgi-bin/carddisp.pl?gene=GRIN2C">https://www.genecards.org/cgi-bin/carddisp.pl?gene=GRIN2C</a> |
| P2RY1  | Purinergic Receptor P2Y1                            | Protein Coding | 53 | GC03P152835 | 1.347520828 | <a href="https://www.genecards.org/cgi-bin/carddisp.pl?gene=P2RY1">https://www.genecards.org/cgi-bin/carddisp.pl?gene=P2RY1</a>   |
| IL3RA  | Interleukin 3 Receptor Subunit Alpha                | Protein Coding | 51 | GC0XP001336 | 1.346916914 | <a href="https://www.genecards.org/cgi-bin/carddisp.pl?gene=IL3RA">https://www.genecards.org/cgi-bin/carddisp.pl?gene=IL3RA</a>   |
| IL1RAP | Interleukin 1 Receptor Accessory Protein            | Protein Coding | 53 | GC03P190514 | 1.346740007 | <a href="https://www.genecards.org/cgi-bin/carddisp.pl?gene=IL1RAP">https://www.genecards.org/cgi-bin/carddisp.pl?gene=IL1RAP</a> |
| EFNA1  | Ephrin A1                                           | Protein Coding | 51 | GC01P155127 | 1.343958974 | <a href="https://www.genecards.org/cgi-bin/carddisp.pl?gene=EFNA1">https://www.genecards.org/cgi-bin/carddisp.pl?gene=EFNA1</a>   |
| GLI1   | GLI Family Zinc Finger 1                            | Protein Coding | 56 | GC12P057616 | 1.343919992 | <a href="https://www.genecards.org/cgi-bin/carddisp.pl?gene=GLI1">https://www.genecards.org/cgi-bin/carddisp.pl?gene=GLI1</a>     |
| RHOD   | Ras Homolog Family Member D                         | Protein Coding | 43 | GC11P071007 | 1.342387915 | <a href="https://www.genecards.org/cgi-bin/carddisp.pl?gene=RHOD">https://www.genecards.org/cgi-bin/carddisp.pl?gene=RHOD</a>     |

|         |                                                         |                |    |             |             |                                                                                                                                     |
|---------|---------------------------------------------------------|----------------|----|-------------|-------------|-------------------------------------------------------------------------------------------------------------------------------------|
| PTPRM   | Protein Tyrosine Phosphatase Receptor Type M            | Protein Coding | 51 | GC18P007557 | 1.341762543 | <a href="https://www.genecards.org/cgi-bin/carddisp.pl?gene=PTPRM">https://www.genecards.org/cgi-bin/carddisp.pl?gene=PTPRM</a>     |
| ZDHHC20 | Zinc Finger DHHC-Type Palmitoyltransferase 20           | Protein Coding | 42 | GC13M021570 | 1.341608047 | <a href="https://www.genecards.org/cgi-bin/carddisp.pl?gene=ZDHHC20">https://www.genecards.org/cgi-bin/carddisp.pl?gene=ZDHHC20</a> |
| CD72    | CD72 Molecule                                           | Protein Coding | 46 | GC09M035610 | 1.341193438 | <a href="https://www.genecards.org/cgi-bin/carddisp.pl?gene=CD72">https://www.genecards.org/cgi-bin/carddisp.pl?gene=CD72</a>       |
| IRF2    | Interferon Regulatory Factor 2                          | Protein Coding | 49 | GC04M184387 | 1.339345694 | <a href="https://www.genecards.org/cgi-bin/carddisp.pl?gene=IRF2">https://www.genecards.org/cgi-bin/carddisp.pl?gene=IRF2</a>       |
| ETF1    | Eukaryotic Translation Termination Factor 1             | Protein Coding | 49 | GC05M138506 | 1.33785367  | <a href="https://www.genecards.org/cgi-bin/carddisp.pl?gene=ETF1">https://www.genecards.org/cgi-bin/carddisp.pl?gene=ETF1</a>       |
| CD3G    | CD3 Gamma Subunit Of T-Cell Receptor Complex            | Protein Coding | 54 | GC11P118344 | 1.336899042 | <a href="https://www.genecards.org/cgi-bin/carddisp.pl?gene=CD3G">https://www.genecards.org/cgi-bin/carddisp.pl?gene=CD3G</a>       |
| CACNG2  | Calcium Voltage-Gated Channel Auxiliary Subunit Gamma 2 | Protein Coding | 51 | GC22M061447 | 1.336666226 | <a href="https://www.genecards.org/cgi-bin/carddisp.pl?gene=CACNG2">https://www.genecards.org/cgi-bin/carddisp.pl?gene=CACNG2</a>   |
| CASP6   | Caspase 6                                               | Protein Coding | 55 | GC04M109688 | 1.335477829 | <a href="https://www.genecards.org/cgi-bin/carddisp.pl?gene=CASP6">https://www.genecards.org/cgi-bin/carddisp.pl?gene=CASP6</a>     |
| DST     | Dystonin                                                | Protein Coding | 49 | GC06M056457 | 1.333791614 | <a href="https://www.genecards.org/cgi-bin/carddisp.pl?gene=DST">https://www.genecards.org/cgi-bin/carddisp.pl?gene=DST</a>         |
| SIGLEC1 | Sialic Acid Binding Ig Like Lectin 1                    | Protein Coding | 47 | GC20M003686 | 1.33364892  | <a href="https://www.genecards.org/cgi-bin/carddisp.pl?gene=SIGLEC1">https://www.genecards.org/cgi-bin/carddisp.pl?gene=SIGLEC1</a> |
| SPIB    | Spi-B Transcription Factor                              | Protein Coding | 46 | GC19P050418 | 1.333257198 | <a href="https://www.genecards.org/cgi-bin/carddisp.pl?gene=SPIB">https://www.genecards.org/cgi-bin/carddisp.pl?gene=SPIB</a>       |
| CBLB    | Cbl Proto-Oncogene B                                    | Protein Coding | 52 | GC03M105655 | 1.332267404 | <a href="https://www.genecards.org/cgi-bin/carddisp.pl?gene=CBLB">https://www.genecards.org/cgi-bin/carddisp.pl?gene=CBLB</a>       |
| CBLC    | Cbl Proto-Oncogene C                                    | Protein Coding | 44 | GC19P044777 | 1.332267404 | <a href="https://www.genecards.org/cgi-bin/carddisp.pl?gene=CBLC">https://www.genecards.org/cgi-bin/carddisp.pl?gene=CBLC</a>       |
| ISG20   | Interferon Stimulated Exonuclease Gene 20               | Protein Coding | 46 | GC15P088635 | 1.330898881 | <a href="https://www.genecards.org/cgi-bin/carddisp.pl?gene=ISG20">https://www.genecards.org/cgi-bin/carddisp.pl?gene=ISG20</a>     |
| TGFBR3  | Transforming Growth Factor Beta Receptor 3              | Protein Coding | 53 | GC01M091680 | 1.329393387 | <a href="https://www.genecards.org/cgi-bin/carddisp.pl?gene=TGFBR3">https://www.genecards.org/cgi-bin/carddisp.pl?gene=TGFBR3</a>   |

|         |                                                  |                |    |             |             |                                                                                                                                     |
|---------|--------------------------------------------------|----------------|----|-------------|-------------|-------------------------------------------------------------------------------------------------------------------------------------|
| PTPRE   | Protein Tyrosine Phosphatase Receptor Type E     | Protein Coding | 49 | GC10P127907 | 1.328865051 | <a href="https://www.genecards.org/cgi-bin/carddisp.pl?gene=PTPRE">https://www.genecards.org/cgi-bin/carddisp.pl?gene=PTPRE</a>     |
| HMG1    | High Mobility Group Nucleosome Binding Domain 1  | Protein Coding | 47 | GC21M039342 | 1.328797698 | <a href="https://www.genecards.org/cgi-bin/carddisp.pl?gene=HMG1">https://www.genecards.org/cgi-bin/carddisp.pl?gene=HMG1</a>       |
| LPAR2   | Lysophosphatidic Acid Receptor 2                 | Protein Coding | 52 | GC19M019624 | 1.32547009  | <a href="https://www.genecards.org/cgi-bin/carddisp.pl?gene=LPAR2">https://www.genecards.org/cgi-bin/carddisp.pl?gene=LPAR2</a>     |
| TM9SF2  | Transmembrane 9 Superfamily Member 2             | Protein Coding | 42 | GC13P099446 | 1.323809385 | <a href="https://www.genecards.org/cgi-bin/carddisp.pl?gene=TM9SF2">https://www.genecards.org/cgi-bin/carddisp.pl?gene=TM9SF2</a>   |
| CCL8    | C-C Motif Chemokine Ligand 8                     | Protein Coding | 46 | GC17P034319 | 1.31999135  | <a href="https://www.genecards.org/cgi-bin/carddisp.pl?gene=CCL8">https://www.genecards.org/cgi-bin/carddisp.pl?gene=CCL8</a>       |
| NPSR1   | Neuropeptide S Receptor 1                        | Protein Coding | 47 | GC07P034664 | 1.319486618 | <a href="https://www.genecards.org/cgi-bin/carddisp.pl?gene=NPSR1">https://www.genecards.org/cgi-bin/carddisp.pl?gene=NPSR1</a>     |
| AGFG1   | ArfGAP With FG Repeats 1                         | Protein Coding | 47 | GC02P227473 | 1.318310976 | <a href="https://www.genecards.org/cgi-bin/carddisp.pl?gene=AGFG1">https://www.genecards.org/cgi-bin/carddisp.pl?gene=AGFG1</a>     |
| RECQL   | RecQ Like Helicase                               | Protein Coding | 48 | GC12M021468 | 1.316822648 | <a href="https://www.genecards.org/cgi-bin/carddisp.pl?gene=RECQL">https://www.genecards.org/cgi-bin/carddisp.pl?gene=RECQL</a>     |
| GAK     | Cyclin G Associated Kinase                       | Protein Coding | 51 | GC04M000849 | 1.314225674 | <a href="https://www.genecards.org/cgi-bin/carddisp.pl?gene=GAK">https://www.genecards.org/cgi-bin/carddisp.pl?gene=GAK</a>         |
| MAP3K4  | Mitogen-Activated Protein Kinase Kinase Kinase 4 | Protein Coding | 50 | GC06P160991 | 1.314225674 | <a href="https://www.genecards.org/cgi-bin/carddisp.pl?gene=MAP3K4">https://www.genecards.org/cgi-bin/carddisp.pl?gene=MAP3K4</a>   |
| DUSP5   | Dual Specificity Phosphatase 5                   | Protein Coding | 48 | GC10P110497 | 1.314225674 | <a href="https://www.genecards.org/cgi-bin/carddisp.pl?gene=DUSP5">https://www.genecards.org/cgi-bin/carddisp.pl?gene=DUSP5</a>     |
| FSCN1   | Fascin Actin-Bundling Protein 1                  | Protein Coding | 51 | GC07P005592 | 1.31301713  | <a href="https://www.genecards.org/cgi-bin/carddisp.pl?gene=FSCN1">https://www.genecards.org/cgi-bin/carddisp.pl?gene=FSCN1</a>     |
| PAX3    | Paired Box 3                                     | Protein Coding | 52 | GC02M222199 | 1.312791586 | <a href="https://www.genecards.org/cgi-bin/carddisp.pl?gene=PAX3">https://www.genecards.org/cgi-bin/carddisp.pl?gene=PAX3</a>       |
| STYX    | Serine/Threonine/Tyrosine Interacting Protein    | Protein Coding | 41 | GC14P052730 | 1.310669065 | <a href="https://www.genecards.org/cgi-bin/carddisp.pl?gene=STYX">https://www.genecards.org/cgi-bin/carddisp.pl?gene=STYX</a>       |
| GNPNAT1 | Glucosamine-Phosphate N-Acetyltransferase 1      | Protein Coding | 46 | GC14M052775 | 1.30973053  | <a href="https://www.genecards.org/cgi-bin/carddisp.pl?gene=GNPNAT1">https://www.genecards.org/cgi-bin/carddisp.pl?gene=GNPNAT1</a> |

|         |                                                    |                |    |             |             |                                                                                                                                     |
|---------|----------------------------------------------------|----------------|----|-------------|-------------|-------------------------------------------------------------------------------------------------------------------------------------|
| HOXA1   | Homeobox A1                                        | Protein Coding | 48 | GC07M027092 | 1.308444142 | <a href="https://www.genecards.org/cgi-bin/carddisp.pl?gene=HOXA1">https://www.genecards.org/cgi-bin/carddisp.pl?gene=HOXA1</a>     |
| ZP3     | Zona Pellucida Glycoprotein 3                      | Protein Coding | 50 | GC07P076837 | 1.305477381 | <a href="https://www.genecards.org/cgi-bin/carddisp.pl?gene=ZP3">https://www.genecards.org/cgi-bin/carddisp.pl?gene=ZP3</a>         |
| PAK3    | P21 (RAC1) Activated Kinase 3                      | Protein Coding | 57 | GC0XP110944 | 1.301856756 | <a href="https://www.genecards.org/cgi-bin/carddisp.pl?gene=PAK3">https://www.genecards.org/cgi-bin/carddisp.pl?gene=PAK3</a>       |
| EFNA4   | Ephrin A4                                          | Protein Coding | 50 | GC01P155063 | 1.301198006 | <a href="https://www.genecards.org/cgi-bin/carddisp.pl?gene=EFNA4">https://www.genecards.org/cgi-bin/carddisp.pl?gene=EFNA4</a>     |
| CD84    | CD84 Molecule                                      | Protein Coding | 49 | GC01M160541 | 1.301198006 | <a href="https://www.genecards.org/cgi-bin/carddisp.pl?gene=CD84">https://www.genecards.org/cgi-bin/carddisp.pl?gene=CD84</a>       |
| CTNND2  | Catenin Delta 2                                    | Protein Coding | 49 | GC05M010971 | 1.297608376 | <a href="https://www.genecards.org/cgi-bin/carddisp.pl?gene=CTNND2">https://www.genecards.org/cgi-bin/carddisp.pl?gene=CTNND2</a>   |
| CYTH1   | Cytohesin 1                                        | Protein Coding | 48 | GC17M078674 | 1.297608376 | <a href="https://www.genecards.org/cgi-bin/carddisp.pl?gene=CYTH1">https://www.genecards.org/cgi-bin/carddisp.pl?gene=CYTH1</a>     |
| TESK1   | Testis Associated Actin Remodelling Kinase 1       | Protein Coding | 48 | GC09P035605 | 1.296860695 | <a href="https://www.genecards.org/cgi-bin/carddisp.pl?gene=TESK1">https://www.genecards.org/cgi-bin/carddisp.pl?gene=TESK1</a>     |
| NECTIN1 | Nectin Cell Adhesion Molecule 1                    | Protein Coding | 53 | GC11M119624 | 1.296584606 | <a href="https://www.genecards.org/cgi-bin/carddisp.pl?gene=NECTIN1">https://www.genecards.org/cgi-bin/carddisp.pl?gene=NECTIN1</a> |
| WASF2   | WASP Family Member 2                               | Protein Coding | 50 | GC01M027404 | 1.296584606 | <a href="https://www.genecards.org/cgi-bin/carddisp.pl?gene=WASF2">https://www.genecards.org/cgi-bin/carddisp.pl?gene=WASF2</a>     |
| NCOA4   | Nuclear Receptor Coactivator 4                     | Protein Coding | 46 | GC10M046005 | 1.295899391 | <a href="https://www.genecards.org/cgi-bin/carddisp.pl?gene=NCOA4">https://www.genecards.org/cgi-bin/carddisp.pl?gene=NCOA4</a>     |
| TRIP10  | Thyroid Hormone Receptor Interactor 10             | Protein Coding | 47 | GC19P006737 | 1.292088509 | <a href="https://www.genecards.org/cgi-bin/carddisp.pl?gene=TRIP10">https://www.genecards.org/cgi-bin/carddisp.pl?gene=TRIP10</a>   |
| PRSS3   | Serine Protease 3                                  | Protein Coding | 50 | GC09P033750 | 1.290347695 | <a href="https://www.genecards.org/cgi-bin/carddisp.pl?gene=PRSS3">https://www.genecards.org/cgi-bin/carddisp.pl?gene=PRSS3</a>     |
| GRIN2D  | Glutamate Ionotropic Receptor NMDA Type Subunit 2D | Protein Coding | 55 | GC19P073182 | 1.288183808 | <a href="https://www.genecards.org/cgi-bin/carddisp.pl?gene=GRIN2D">https://www.genecards.org/cgi-bin/carddisp.pl?gene=GRIN2D</a>   |
| KLRD1   | Killer Cell Lectin Like Receptor D1                | Protein Coding | 48 | GC12P010226 | 1.287742376 | <a href="https://www.genecards.org/cgi-bin/carddisp.pl?gene=KLRD1">https://www.genecards.org/cgi-bin/carddisp.pl?gene=KLRD1</a>     |

|         |                                                                     |                |    |             |             |                                                                                                                                     |
|---------|---------------------------------------------------------------------|----------------|----|-------------|-------------|-------------------------------------------------------------------------------------------------------------------------------------|
| MAP4K1  | Mitogen-Activated Protein Kinase Kinase Kinase Kinase 1             | Protein Coding | 50 | GC19M038587 | 1.286914349 | <a href="https://www.genecards.org/cgi-bin/carddisp.pl?gene=MAP4K1">https://www.genecards.org/cgi-bin/carddisp.pl?gene=MAP4K1</a>   |
| KIF5A   | Kinesin Family Member 5A                                            | Protein Coding | 51 | GC12P057555 | 1.28510344  | <a href="https://www.genecards.org/cgi-bin/carddisp.pl?gene=KIF5A">https://www.genecards.org/cgi-bin/carddisp.pl?gene=KIF5A</a>     |
| GYPC    | Glycophorin C (Gerbich Blood Group)                                 | Protein Coding | 50 | GC02P126655 | 1.281240463 | <a href="https://www.genecards.org/cgi-bin/carddisp.pl?gene=GYPC">https://www.genecards.org/cgi-bin/carddisp.pl?gene=GYPC</a>       |
| SORBS2  | Sorbin And SH3 Domain Containing 2                                  | Protein Coding | 47 | GC04M185585 | 1.275793552 | <a href="https://www.genecards.org/cgi-bin/carddisp.pl?gene=SORBS2">https://www.genecards.org/cgi-bin/carddisp.pl?gene=SORBS2</a>   |
| EFS     | Embryonal Fyn-Associated Substrate                                  | Protein Coding | 41 | GC14M023356 | 1.274370074 | <a href="https://www.genecards.org/cgi-bin/carddisp.pl?gene=EFS">https://www.genecards.org/cgi-bin/carddisp.pl?gene=EFS</a>         |
| PTPRT   | Protein Tyrosine Phosphatase Receptor Type T                        | Protein Coding | 51 | GC20M042072 | 1.274230242 | <a href="https://www.genecards.org/cgi-bin/carddisp.pl?gene=PTPRT">https://www.genecards.org/cgi-bin/carddisp.pl?gene=PTPRT</a>     |
| MAP3K13 | Mitogen-Activated Protein Kinase Kinase Kinase 13                   | Protein Coding | 48 | GC03P185282 | 1.274230242 | <a href="https://www.genecards.org/cgi-bin/carddisp.pl?gene=MAP3K13">https://www.genecards.org/cgi-bin/carddisp.pl?gene=MAP3K13</a> |
| ABCC10  | ATP Binding Cassette Subfamily C Member 10                          | Protein Coding | 45 | GC06P043427 | 1.270961523 | <a href="https://www.genecards.org/cgi-bin/carddisp.pl?gene=ABCC10">https://www.genecards.org/cgi-bin/carddisp.pl?gene=ABCC10</a>   |
| SH2D4B  | SH2 Domain Containing 4B                                            | Protein Coding | 38 | GC10P094472 | 1.270071507 | <a href="https://www.genecards.org/cgi-bin/carddisp.pl?gene=SH2D4B">https://www.genecards.org/cgi-bin/carddisp.pl?gene=SH2D4B</a>   |
| PLCXD3  | Phosphatidylinositol Specific Phospholipase C X Domain Containing 3 | Protein Coding | 43 | GC05M041306 | 1.269739866 | <a href="https://www.genecards.org/cgi-bin/carddisp.pl?gene=PLCXD3">https://www.genecards.org/cgi-bin/carddisp.pl?gene=PLCXD3</a>   |
| GMNN    | Geminin DNA Replication Inhibitor                                   | Protein Coding | 51 | GC06P024779 | 1.268566847 | <a href="https://www.genecards.org/cgi-bin/carddisp.pl?gene=GMNN">https://www.genecards.org/cgi-bin/carddisp.pl?gene=GMNN</a>       |
| NFE2    | Nuclear Factor, Erythroid 2                                         | Protein Coding | 46 | GC12M054292 | 1.266424775 | <a href="https://www.genecards.org/cgi-bin/carddisp.pl?gene=NFE2">https://www.genecards.org/cgi-bin/carddisp.pl?gene=NFE2</a>       |
| SLC15A4 | Solute Carrier Family 15 Member 4                                   | Protein Coding | 44 | GC12M128793 | 1.263706923 | <a href="https://www.genecards.org/cgi-bin/carddisp.pl?gene=SLC15A4">https://www.genecards.org/cgi-bin/carddisp.pl?gene=SLC15A4</a> |
| RPL10L  | Ribosomal Protein L10 Like                                          | Protein Coding | 42 | GC14M046651 | 1.262371421 | <a href="https://www.genecards.org/cgi-bin/carddisp.pl?gene=RPL10L">https://www.genecards.org/cgi-bin/carddisp.pl?gene=RPL10L</a>   |
| GRM6    | Glutamate Metabotropic Receptor 6                                   | Protein Coding | 53 | GC05M178978 | 1.260549188 | <a href="https://www.genecards.org/cgi-bin/carddisp.pl?gene=GRM6">https://www.genecards.org/cgi-bin/carddisp.pl?gene=GRM6</a>       |

|         |                                               |                |    |             |             |                                                                                                                                     |
|---------|-----------------------------------------------|----------------|----|-------------|-------------|-------------------------------------------------------------------------------------------------------------------------------------|
| DOCK1   | Dedicator Of Cytokinesis 1                    | Protein Coding | 50 | GC10P126905 | 1.260548592 | <a href="https://www.genecards.org/cgi-bin/carddisp.pl?gene=DOCK1">https://www.genecards.org/cgi-bin/carddisp.pl?gene=DOCK1</a>     |
| GRIP2   | Glutamate Receptor Interacting Protein 2      | Protein Coding | 42 | GC03M021835 | 1.258551359 | <a href="https://www.genecards.org/cgi-bin/carddisp.pl?gene=GRIP2">https://www.genecards.org/cgi-bin/carddisp.pl?gene=GRIP2</a>     |
| NRBF2   | Nuclear Receptor Binding Factor 2             | Protein Coding | 43 | GC10P063133 | 1.257070303 | <a href="https://www.genecards.org/cgi-bin/carddisp.pl?gene=NRBF2">https://www.genecards.org/cgi-bin/carddisp.pl?gene=NRBF2</a>     |
| ADD2    | Adducin 2                                     | Protein Coding | 47 | GC02M070626 | 1.252891302 | <a href="https://www.genecards.org/cgi-bin/carddisp.pl?gene=ADD2">https://www.genecards.org/cgi-bin/carddisp.pl?gene=ADD2</a>       |
| CNTNAP1 | Contactin Associated Protein 1                | Protein Coding | 50 | GC17P042682 | 1.252706528 | <a href="https://www.genecards.org/cgi-bin/carddisp.pl?gene=CNTNAP1">https://www.genecards.org/cgi-bin/carddisp.pl?gene=CNTNAP1</a> |
| MDK     | Midkine                                       | Protein Coding | 50 | GC11P046380 | 1.25058341  | <a href="https://www.genecards.org/cgi-bin/carddisp.pl?gene=MDK">https://www.genecards.org/cgi-bin/carddisp.pl?gene=MDK</a>         |
| ZBTB11  | Zinc Finger And BTB Domain Containing 11      | Protein Coding | 42 | GC03M101648 | 1.248044372 | <a href="https://www.genecards.org/cgi-bin/carddisp.pl?gene=ZBTB11">https://www.genecards.org/cgi-bin/carddisp.pl?gene=ZBTB11</a>   |
| CNTNAP2 | Contactin Associated Protein 2                | Protein Coding | 51 | GC07P146116 | 1.244960666 | <a href="https://www.genecards.org/cgi-bin/carddisp.pl?gene=CNTNAP2">https://www.genecards.org/cgi-bin/carddisp.pl?gene=CNTNAP2</a> |
| ZDHHC21 | Zinc Finger DHHC-Type Palmitoyltransferase 21 | Protein Coding | 40 | GC09M014590 | 1.242198229 | <a href="https://www.genecards.org/cgi-bin/carddisp.pl?gene=ZDHHC21">https://www.genecards.org/cgi-bin/carddisp.pl?gene=ZDHHC21</a> |
| TSC22D3 | TSC22 Domain Family Member 3                  | Protein Coding | 46 | GC0XM107713 | 1.240224838 | <a href="https://www.genecards.org/cgi-bin/carddisp.pl?gene=TSC22D3">https://www.genecards.org/cgi-bin/carddisp.pl?gene=TSC22D3</a> |
| KAT6B   | Lysine Acetyltransferase 6B                   | Protein Coding | 52 | GC10P074873 | 1.239717484 | <a href="https://www.genecards.org/cgi-bin/carddisp.pl?gene=KAT6B">https://www.genecards.org/cgi-bin/carddisp.pl?gene=KAT6B</a>     |
| DFFB    | DNA Fragmentation Factor Subunit Beta         | Protein Coding | 50 | GC01P003857 | 1.237127662 | <a href="https://www.genecards.org/cgi-bin/carddisp.pl?gene=DFFB">https://www.genecards.org/cgi-bin/carddisp.pl?gene=DFFB</a>       |
| CD6     | CD6 Molecule                                  | Protein Coding | 48 | GC11P060971 | 1.236596346 | <a href="https://www.genecards.org/cgi-bin/carddisp.pl?gene=CD6">https://www.genecards.org/cgi-bin/carddisp.pl?gene=CD6</a>         |
| GRB7    | Growth Factor Receptor Bound Protein 7        | Protein Coding | 50 | GC17P061875 | 1.234689474 | <a href="https://www.genecards.org/cgi-bin/carddisp.pl?gene=GRB7">https://www.genecards.org/cgi-bin/carddisp.pl?gene=GRB7</a>       |
| CDYL    | Chromodomain Y Like                           | Protein Coding | 46 | GC06P004706 | 1.230699301 | <a href="https://www.genecards.org/cgi-bin/carddisp.pl?gene=CDYL">https://www.genecards.org/cgi-bin/carddisp.pl?gene=CDYL</a>       |



|          |                                                                   |                |    |             |             |                                                                                                                                       |
|----------|-------------------------------------------------------------------|----------------|----|-------------|-------------|---------------------------------------------------------------------------------------------------------------------------------------|
| EPHB6    | EPH Receptor B6                                                   | Protein Coding | 51 | GC07P149981 | 1.230352283 | <a href="https://www.genecards.org/cgi-bin/carddisp.pl?gene=EPHB6">https://www.genecards.org/cgi-bin/carddisp.pl?gene=EPHB6</a>       |
| STAM     | Signal Transducing Adaptor Molecule                               | Protein Coding | 47 | GC10P017698 | 1.228438377 | <a href="https://www.genecards.org/cgi-bin/carddisp.pl?gene=STAM">https://www.genecards.org/cgi-bin/carddisp.pl?gene=STAM</a>         |
| CYRIB    | CYFIP Related Rac1 Interactor B                                   | Protein Coding | 40 | GC08M132565 | 1.221472621 | <a href="https://www.genecards.org/cgi-bin/carddisp.pl?gene=CYRIB">https://www.genecards.org/cgi-bin/carddisp.pl?gene=CYRIB</a>       |
| GLRA2    | Glycine Receptor Alpha 2                                          | Protein Coding | 52 | GC0XP014448 | 1.221354008 | <a href="https://www.genecards.org/cgi-bin/carddisp.pl?gene=GLRA2">https://www.genecards.org/cgi-bin/carddisp.pl?gene=GLRA2</a>       |
| SNU13    | Small Nuclear Ribonucleoprotein 13                                | Protein Coding | 46 | GC22M061492 | 1.218278646 | <a href="https://www.genecards.org/cgi-bin/carddisp.pl?gene=SNU13">https://www.genecards.org/cgi-bin/carddisp.pl?gene=SNU13</a>       |
| TREM1    | Triggering Receptor Expressed On Myeloid Cells 1                  | Protein Coding | 48 | GC06M041267 | 1.218127251 | <a href="https://www.genecards.org/cgi-bin/carddisp.pl?gene=TREM1">https://www.genecards.org/cgi-bin/carddisp.pl?gene=TREM1</a>       |
| ZDHHC1   | Zinc Finger DHHC-Type Containing 1                                | Protein Coding | 42 | GC16M067394 | 1.217028856 | <a href="https://www.genecards.org/cgi-bin/carddisp.pl?gene=ZDHHC1">https://www.genecards.org/cgi-bin/carddisp.pl?gene=ZDHHC1</a>     |
| NFASC    | Neurofascin                                                       | Protein Coding | 50 | GC01P204828 | 1.212895989 | <a href="https://www.genecards.org/cgi-bin/carddisp.pl?gene=NFASC">https://www.genecards.org/cgi-bin/carddisp.pl?gene=NFASC</a>       |
| TYROBP   | Transmembrane Immune Signaling Adaptor TYROBP                     | Protein Coding | 50 | GC19M035904 | 1.212895989 | <a href="https://www.genecards.org/cgi-bin/carddisp.pl?gene=TYROBP">https://www.genecards.org/cgi-bin/carddisp.pl?gene=TYROBP</a>     |
| RHOQ     | Ras Homolog Family Member Q                                       | Protein Coding | 48 | GC02P046543 | 1.205293775 | <a href="https://www.genecards.org/cgi-bin/carddisp.pl?gene=RHOQ">https://www.genecards.org/cgi-bin/carddisp.pl?gene=RHOQ</a>         |
| NEDD9    | Neural Precursor Cell Expressed, Developmentally Down-Regulated 9 | Protein Coding | 48 | GC06M011183 | 1.203222752 | <a href="https://www.genecards.org/cgi-bin/carddisp.pl?gene=NEDD9">https://www.genecards.org/cgi-bin/carddisp.pl?gene=NEDD9</a>       |
| ZDHHC17  | Zinc Finger DHHC-Type Palmitoyltransferase 17                     | Protein Coding | 44 | GC12P076763 | 1.20134306  | <a href="https://www.genecards.org/cgi-bin/carddisp.pl?gene=ZDHHC17">https://www.genecards.org/cgi-bin/carddisp.pl?gene=ZDHHC17</a>   |
| MARCKSL1 | MARCKS Like 1                                                     | Protein Coding | 43 | GC01M032334 | 1.201022148 | <a href="https://www.genecards.org/cgi-bin/carddisp.pl?gene=MARCKSL1">https://www.genecards.org/cgi-bin/carddisp.pl?gene=MARCKSL1</a> |
| GUCA2A   | Guanylate Cyclase Activator 2A                                    | Protein Coding | 43 | GC01M042162 | 1.200126886 | <a href="https://www.genecards.org/cgi-bin/carddisp.pl?gene=GUCA2A">https://www.genecards.org/cgi-bin/carddisp.pl?gene=GUCA2A</a>     |
| SLC15A3  | Solute Carrier Family 15 Member 3                                 | Protein Coding | 43 | GC11M099519 | 1.196174622 | <a href="https://www.genecards.org/cgi-bin/carddisp.pl?gene=SLC15A3">https://www.genecards.org/cgi-bin/carddisp.pl?gene=SLC15A3</a>   |

|         |                                                                                      |                |    |             |             |                                                                                                                                       |
|---------|--------------------------------------------------------------------------------------|----------------|----|-------------|-------------|---------------------------------------------------------------------------------------------------------------------------------------|
| METTL6  | Methyltransferase 6, Methylcytidine                                                  | Protein Coding | 40 | GC03M021855 | 1.196174622 | <a href="https://www.genecards.org/cgi-bin/carddisp.pl?gene=METTL6">https://www.genecards.org/cgi-bin/carddisp.pl?gene=METTL6</a>     |
| STX4    | Syntaxin 4                                                                           | Protein Coding | 48 | GC16P042831 | 1.193569422 | <a href="https://www.genecards.org/cgi-bin/carddisp.pl?gene=STX4">https://www.genecards.org/cgi-bin/carddisp.pl?gene=STX4</a>         |
| DNASE1  | Deoxyribonuclease 1                                                                  | Protein Coding | 50 | GC16P003611 | 1.188389778 | <a href="https://www.genecards.org/cgi-bin/carddisp.pl?gene=DNASE1">https://www.genecards.org/cgi-bin/carddisp.pl?gene=DNASE1</a>     |
| SIGMAR1 | Sigma Non-Opioid Intracellular Receptor 1                                            | Protein Coding | 54 | GC09M034634 | 1.185390472 | <a href="https://www.genecards.org/cgi-bin/carddisp.pl?gene=SIGMAR1">https://www.genecards.org/cgi-bin/carddisp.pl?gene=SIGMAR1</a>   |
| CDH3    | Cadherin 3                                                                           | Protein Coding | 54 | GC16P068637 | 1.185385942 | <a href="https://www.genecards.org/cgi-bin/carddisp.pl?gene=CDH3">https://www.genecards.org/cgi-bin/carddisp.pl?gene=CDH3</a>         |
| BAMBI   | BMP And Activin Membrane Bound Inhibitor                                             | Protein Coding | 50 | GC10P028685 | 1.185385942 | <a href="https://www.genecards.org/cgi-bin/carddisp.pl?gene=BAMBI">https://www.genecards.org/cgi-bin/carddisp.pl?gene=BAMBI</a>       |
| TLX1    | T Cell Leukemia Homeobox 1                                                           | Protein Coding | 46 | GC10P101130 | 1.180054665 | <a href="https://www.genecards.org/cgi-bin/carddisp.pl?gene=TLX1">https://www.genecards.org/cgi-bin/carddisp.pl?gene=TLX1</a>         |
| KIR2DL1 | Killer Cell Immunoglobulin Like Receptor, Two Ig Domains And Long Cytoplasmic Tail 1 | Protein Coding | 42 | GC19P073500 | 1.180054665 | <a href="https://www.genecards.org/cgi-bin/carddisp.pl?gene=KIR2DL1">https://www.genecards.org/cgi-bin/carddisp.pl?gene=KIR2DL1</a>   |
| FGR     | FGR Proto-Oncogene, Src Family Tyrosine Kinase                                       | Protein Coding | 53 | GC01M028092 | 1.177772641 | <a href="https://www.genecards.org/cgi-bin/carddisp.pl?gene=FGR">https://www.genecards.org/cgi-bin/carddisp.pl?gene=FGR</a>           |
| ARHGEF1 | Rho Guanine Nucleotide Exchange Factor 12                                            | Protein Coding | 49 | GC11P120336 | 1.177476287 | <a href="https://www.genecards.org/cgi-bin/carddisp.pl?gene=ARHGEF12">https://www.genecards.org/cgi-bin/carddisp.pl?gene=ARHGEF12</a> |
| ERVK-6  | Endogenous Retrovirus Group K Member 6, Envelope                                     | Protein Coding | 21 | GC07U903184 | 1.177476287 | <a href="https://www.genecards.org/cgi-bin/carddisp.pl?gene=ERVK-6">https://www.genecards.org/cgi-bin/carddisp.pl?gene=ERVK-6</a>     |
| CDY2A   | Chromodomain Y-Linked 2A                                                             | Protein Coding | 31 | GC0YP018025 | 1.177319527 | <a href="https://www.genecards.org/cgi-bin/carddisp.pl?gene=CDY2A">https://www.genecards.org/cgi-bin/carddisp.pl?gene=CDY2A</a>       |
| KAT8    | Lysine Acetyltransferase 8                                                           | Protein Coding | 51 | GC16P042841 | 1.171679974 | <a href="https://www.genecards.org/cgi-bin/carddisp.pl?gene=KAT8">https://www.genecards.org/cgi-bin/carddisp.pl?gene=KAT8</a>         |
| UBFD1   | Ubiquitin Family Domain Containing 1                                                 | Protein Coding | 39 | GC16P023557 | 1.170049906 | <a href="https://www.genecards.org/cgi-bin/carddisp.pl?gene=UBFD1">https://www.genecards.org/cgi-bin/carddisp.pl?gene=UBFD1</a>       |
| ETV4    | ETS Variant Transcription Factor 4                                                   | Protein Coding | 49 | GC17M043527 | 1.163003087 | <a href="https://www.genecards.org/cgi-bin/carddisp.pl?gene=ETV4">https://www.genecards.org/cgi-bin/carddisp.pl?gene=ETV4</a>         |

|         |                                                        |                |    |             |             |                                                                                                                                     |
|---------|--------------------------------------------------------|----------------|----|-------------|-------------|-------------------------------------------------------------------------------------------------------------------------------------|
| GFRA2   | GDNF Family Receptor Alpha 2                           | Protein Coding | 51 | GC08M021690 | 1.161565185 | <a href="https://www.genecards.org/cgi-bin/carddisp.pl?gene=GFRA2">https://www.genecards.org/cgi-bin/carddisp.pl?gene=GFRA2</a>     |
| CBFA2T2 | CBFA2/RUNX1 Partner Transcriptional Co-Repressor 2     | Protein Coding | 43 | GC20P033490 | 1.158389688 | <a href="https://www.genecards.org/cgi-bin/carddisp.pl?gene=CBFA2T2">https://www.genecards.org/cgi-bin/carddisp.pl?gene=CBFA2T2</a> |
| LACRT   | Lacritin                                               | Protein Coding | 38 | GC12M055055 | 1.158389688 | <a href="https://www.genecards.org/cgi-bin/carddisp.pl?gene=LACRT">https://www.genecards.org/cgi-bin/carddisp.pl?gene=LACRT</a>     |
| CRIPT   | CXXC Repeat Containing Interactor Of PDZ3 Domain       | Protein Coding | 46 | GC02P046616 | 1.155421019 | <a href="https://www.genecards.org/cgi-bin/carddisp.pl?gene=CRIPT">https://www.genecards.org/cgi-bin/carddisp.pl?gene=CRIPT</a>     |
| HDAC11  | Histone Deacetylase 11                                 | Protein Coding | 51 | GC03P013749 | 1.151618719 | <a href="https://www.genecards.org/cgi-bin/carddisp.pl?gene=HDAC11">https://www.genecards.org/cgi-bin/carddisp.pl?gene=HDAC11</a>   |
| S100A2  | S100 Calcium Binding Protein A2                        | Protein Coding | 47 | GC01M153561 | 1.150105476 | <a href="https://www.genecards.org/cgi-bin/carddisp.pl?gene=S100A2">https://www.genecards.org/cgi-bin/carddisp.pl?gene=S100A2</a>   |
| CD96    | CD96 Molecule                                          | Protein Coding | 51 | GC03P111292 | 1.148190379 | <a href="https://www.genecards.org/cgi-bin/carddisp.pl?gene=CD96">https://www.genecards.org/cgi-bin/carddisp.pl?gene=CD96</a>       |
| MMP20   | Matrix Metalloproteinase 20                            | Protein Coding | 51 | GC11M102576 | 1.147861481 | <a href="https://www.genecards.org/cgi-bin/carddisp.pl?gene=MMP20">https://www.genecards.org/cgi-bin/carddisp.pl?gene=MMP20</a>     |
| STK10   | Serine/Threonine Kinase 10                             | Protein Coding | 50 | GC05M172042 | 1.147695661 | <a href="https://www.genecards.org/cgi-bin/carddisp.pl?gene=STK10">https://www.genecards.org/cgi-bin/carddisp.pl?gene=STK10</a>     |
| CCDC26  | CCDC26 Long Non-Coding RNA                             | RNA Gene       | 31 | GC08M132556 | 1.144457102 | <a href="https://www.genecards.org/cgi-bin/carddisp.pl?gene=CCDC26">https://www.genecards.org/cgi-bin/carddisp.pl?gene=CCDC26</a>   |
| ITGA1   | Integrin Subunit Alpha 1                               | Protein Coding | 51 | GC05P052788 | 1.142069697 | <a href="https://www.genecards.org/cgi-bin/carddisp.pl?gene=ITGA1">https://www.genecards.org/cgi-bin/carddisp.pl?gene=ITGA1</a>     |
| CLEC4D  | C-Type Lectin Domain Family 4 Member D                 | Protein Coding | 44 | GC12P008509 | 1.141966224 | <a href="https://www.genecards.org/cgi-bin/carddisp.pl?gene=CLEC4D">https://www.genecards.org/cgi-bin/carddisp.pl?gene=CLEC4D</a>   |
| PSPN    | Persephin                                              | Protein Coding | 43 | GC19M006375 | 1.141966224 | <a href="https://www.genecards.org/cgi-bin/carddisp.pl?gene=PSPN">https://www.genecards.org/cgi-bin/carddisp.pl?gene=PSPN</a>       |
| QPCT    | Glutaminyl-Peptide Cyclotransferase                    | Protein Coding | 50 | GC02P037344 | 1.141539812 | <a href="https://www.genecards.org/cgi-bin/carddisp.pl?gene=QPCT">https://www.genecards.org/cgi-bin/carddisp.pl?gene=QPCT</a>       |
| KCNK3   | Potassium Two Pore Domain Channel Subfamily K Member 3 | Protein Coding | 57 | GC02P026692 | 1.140071511 | <a href="https://www.genecards.org/cgi-bin/carddisp.pl?gene=KCNK3">https://www.genecards.org/cgi-bin/carddisp.pl?gene=KCNK3</a>     |

|         |                                                  |                |    |             |             |                                                                                                                                       |
|---------|--------------------------------------------------|----------------|----|-------------|-------------|---------------------------------------------------------------------------------------------------------------------------------------|
| KLRC1   | Killer Cell Lectin Like Receptor C1              | Protein Coding | 48 | GC12M022635 | 1.138934731 | <a href="https://www.genecards.org/cgi-bin/carddisp.pl?gene=KLRC1">https://www.genecards.org/cgi-bin/carddisp.pl?gene=KLRC1</a>       |
| SPINT1  | Serine Peptidase Inhibitor, Kunitz Type 1        | Protein Coding | 48 | GC15P040844 | 1.138934731 | <a href="https://www.genecards.org/cgi-bin/carddisp.pl?gene=SPINT1">https://www.genecards.org/cgi-bin/carddisp.pl?gene=SPINT1</a>     |
| SS18    | SS18 Subunit Of BAF Chromatin Remodeling Complex | Protein Coding | 46 | GC18M026016 | 1.138934731 | <a href="https://www.genecards.org/cgi-bin/carddisp.pl?gene=SS18">https://www.genecards.org/cgi-bin/carddisp.pl?gene=SS18</a>         |
| TSPAN32 | Tetraspanin 32                                   | Protein Coding | 42 | GC11P002302 | 1.138934731 | <a href="https://www.genecards.org/cgi-bin/carddisp.pl?gene=TSPAN32">https://www.genecards.org/cgi-bin/carddisp.pl?gene=TSPAN32</a>   |
| GRM4    | Glutamate Metabotropic Receptor 4                | Protein Coding | 52 | GC06M071850 | 1.136897206 | <a href="https://www.genecards.org/cgi-bin/carddisp.pl?gene=GRM4">https://www.genecards.org/cgi-bin/carddisp.pl?gene=GRM4</a>         |
| TNK2    | Tyrosine Kinase Non Receptor 2                   | Protein Coding | 54 | GC03M195863 | 1.136035442 | <a href="https://www.genecards.org/cgi-bin/carddisp.pl?gene=TNK2">https://www.genecards.org/cgi-bin/carddisp.pl?gene=TNK2</a>         |
| NSUN5   | NOP2/Sun RNA Methyltransferase 5                 | Protein Coding | 45 | GC07M073302 | 1.136035442 | <a href="https://www.genecards.org/cgi-bin/carddisp.pl?gene=NSUN5">https://www.genecards.org/cgi-bin/carddisp.pl?gene=NSUN5</a>       |
| AFAP1   | Actin Filament Associated Protein 1              | Protein Coding | 45 | GC04M007758 | 1.135466218 | <a href="https://www.genecards.org/cgi-bin/carddisp.pl?gene=AFAP1">https://www.genecards.org/cgi-bin/carddisp.pl?gene=AFAP1</a>       |
| ARHGEF1 | Rho Guanine Nucleotide Exchange Factor 11        | Protein Coding | 48 | GC01M156934 | 1.134341598 | <a href="https://www.genecards.org/cgi-bin/carddisp.pl?gene=ARHGEF11">https://www.genecards.org/cgi-bin/carddisp.pl?gene=ARHGEF11</a> |
| CTRL    | Chymotrypsin Like                                | Protein Coding | 47 | GC16M067927 | 1.133171082 | <a href="https://www.genecards.org/cgi-bin/carddisp.pl?gene=CTRL">https://www.genecards.org/cgi-bin/carddisp.pl?gene=CTRL</a>         |
| MCF2    | MCF.2 Cell Line Derived Transforming Sequence    | Protein Coding | 47 | GC0XM139581 | 1.130852818 | <a href="https://www.genecards.org/cgi-bin/carddisp.pl?gene=MCF2">https://www.genecards.org/cgi-bin/carddisp.pl?gene=MCF2</a>         |
| GLRA4   | Glycine Receptor Alpha 4 (Pseudogene)            | Pseudogene     | 32 | GC0XM103707 | 1.126724005 | <a href="https://www.genecards.org/cgi-bin/carddisp.pl?gene=GLRA4">https://www.genecards.org/cgi-bin/carddisp.pl?gene=GLRA4</a>       |
| NCK1    | NCK Adaptor Protein 1                            | Protein Coding | 50 | GC03P136862 | 1.126284242 | <a href="https://www.genecards.org/cgi-bin/carddisp.pl?gene=NCK1">https://www.genecards.org/cgi-bin/carddisp.pl?gene=NCK1</a>         |
| FGF5    | Fibroblast Growth Factor 5                       | Protein Coding | 50 | GC04P080266 | 1.118101239 | <a href="https://www.genecards.org/cgi-bin/carddisp.pl?gene=FGF5">https://www.genecards.org/cgi-bin/carddisp.pl?gene=FGF5</a>         |
| HDAC10  | Histone Deacetylase 10                           | Protein Coding | 51 | GC22M050245 | 1.117851496 | <a href="https://www.genecards.org/cgi-bin/carddisp.pl?gene=HDAC10">https://www.genecards.org/cgi-bin/carddisp.pl?gene=HDAC10</a>     |

|          |                                                                  |                |    |             |             |                                                                                                                                       |
|----------|------------------------------------------------------------------|----------------|----|-------------|-------------|---------------------------------------------------------------------------------------------------------------------------------------|
| VGLL3    | Vestigial Like Family Member 3                                   | Protein Coding | 41 | GC03M086876 | 1.116021156 | <a href="https://www.genecards.org/cgi-bin/carddisp.pl?gene=VGLL3">https://www.genecards.org/cgi-bin/carddisp.pl?gene=VGLL3</a>       |
| HCLS1    | Hematopoietic Cell-Specific Lyn Substrate 1                      | Protein Coding | 50 | GC03M121631 | 1.114315152 | <a href="https://www.genecards.org/cgi-bin/carddisp.pl?gene=HCLS1">https://www.genecards.org/cgi-bin/carddisp.pl?gene=HCLS1</a>       |
| LY9      | Lymphocyte Antigen 9                                             | Protein Coding | 47 | GC01P160796 | 1.113487959 | <a href="https://www.genecards.org/cgi-bin/carddisp.pl?gene=LY9">https://www.genecards.org/cgi-bin/carddisp.pl?gene=LY9</a>           |
| MYO6     | Myosin VI                                                        | Protein Coding | 51 | GC06P075749 | 1.11263597  | <a href="https://www.genecards.org/cgi-bin/carddisp.pl?gene=MYO6">https://www.genecards.org/cgi-bin/carddisp.pl?gene=MYO6</a>         |
| MMP16    | Matrix Metalloproteinase 16                                      | Protein Coding | 52 | GC08M088032 | 1.110368371 | <a href="https://www.genecards.org/cgi-bin/carddisp.pl?gene=MMP16">https://www.genecards.org/cgi-bin/carddisp.pl?gene=MMP16</a>       |
| CARD16   | Caspase Recruitment Domain Family Member 16                      | Protein Coding | 40 | GC11M105041 | 1.109456182 | <a href="https://www.genecards.org/cgi-bin/carddisp.pl?gene=CARD16">https://www.genecards.org/cgi-bin/carddisp.pl?gene=CARD16</a>     |
| IL12RB2  | Interleukin 12 Receptor Subunit Beta 2                           | Protein Coding | 51 | GC01P067307 | 1.108985543 | <a href="https://www.genecards.org/cgi-bin/carddisp.pl?gene=IL12RB2">https://www.genecards.org/cgi-bin/carddisp.pl?gene=IL12RB2</a>   |
| EPHB1    | EPH Receptor B1                                                  | Protein Coding | 55 | GC03P134795 | 1.108498573 | <a href="https://www.genecards.org/cgi-bin/carddisp.pl?gene=EPHB1">https://www.genecards.org/cgi-bin/carddisp.pl?gene=EPHB1</a>       |
| EPHA8    | EPH Receptor A8                                                  | Protein Coding | 51 | GC01P022563 | 1.108498573 | <a href="https://www.genecards.org/cgi-bin/carddisp.pl?gene=EPHA8">https://www.genecards.org/cgi-bin/carddisp.pl?gene=EPHA8</a>       |
| PTPN7    | Protein Tyrosine Phosphatase Non-Receptor Type 7                 | Protein Coding | 51 | GC01M202147 | 1.108498573 | <a href="https://www.genecards.org/cgi-bin/carddisp.pl?gene=PTPN7">https://www.genecards.org/cgi-bin/carddisp.pl?gene=PTPN7</a>       |
| ARC      | Activity Regulated Cytoskeleton Associated Protein               | Protein Coding | 43 | GC08M142611 | 1.108227015 | <a href="https://www.genecards.org/cgi-bin/carddisp.pl?gene=ARC">https://www.genecards.org/cgi-bin/carddisp.pl?gene=ARC</a>           |
| AKAP12   | A-Kinase Anchoring Protein 12                                    | Protein Coding | 48 | GC06P151239 | 1.107064486 | <a href="https://www.genecards.org/cgi-bin/carddisp.pl?gene=AKAP12">https://www.genecards.org/cgi-bin/carddisp.pl?gene=AKAP12</a>     |
| TRPC1    | Transient Receptor Potential Cation Channel Subfamily C Member 1 | Protein Coding | 48 | GC03P142724 | 1.106306195 | <a href="https://www.genecards.org/cgi-bin/carddisp.pl?gene=TRPC1">https://www.genecards.org/cgi-bin/carddisp.pl?gene=TRPC1</a>       |
| C19orf48 | Chromosome 19 Putative Open Reading Frame 48                     | Pseudogene     | 36 | GC19M050797 | 1.105926037 | <a href="https://www.genecards.org/cgi-bin/carddisp.pl?gene=C19orf48">https://www.genecards.org/cgi-bin/carddisp.pl?gene=C19orf48</a> |
| MUC2     | Mucin 2, Oligomeric Mucus/Gel-Forming                            | Protein Coding | 44 | GC11P001074 | 1.104578614 | <a href="https://www.genecards.org/cgi-bin/carddisp.pl?gene=MUC2">https://www.genecards.org/cgi-bin/carddisp.pl?gene=MUC2</a>         |

|         |                                                                                       |                |    |             |             |                                                                                                                                     |
|---------|---------------------------------------------------------------------------------------|----------------|----|-------------|-------------|-------------------------------------------------------------------------------------------------------------------------------------|
| KRT20   | Keratin 20                                                                            | Protein Coding | 46 | GC17M040875 | 1.095470786 | <a href="https://www.genecards.org/cgi-bin/carddisp.pl?gene=KRT20">https://www.genecards.org/cgi-bin/carddisp.pl?gene=KRT20</a>     |
| KIR2DS4 | Killer Cell Immunoglobulin Like Receptor, Two Ig Domains And Short Cytoplasmic Tail 4 | Protein Coding | 37 | GC19P073504 | 1.095470786 | <a href="https://www.genecards.org/cgi-bin/carddisp.pl?gene=KIR2DS4">https://www.genecards.org/cgi-bin/carddisp.pl?gene=KIR2DS4</a> |
| NAA30   | N-Alpha-Acetyltransferase 30, NatC Catalytic Subunit                                  | Protein Coding | 44 | GC14P057390 | 1.092493534 | <a href="https://www.genecards.org/cgi-bin/carddisp.pl?gene=NAA30">https://www.genecards.org/cgi-bin/carddisp.pl?gene=NAA30</a>     |
| EPHB3   | EPH Receptor B3                                                                       | Protein Coding | 53 | GC03P184561 | 1.091133595 | <a href="https://www.genecards.org/cgi-bin/carddisp.pl?gene=EPHB3">https://www.genecards.org/cgi-bin/carddisp.pl?gene=EPHB3</a>     |
| CDK20   | Cyclin Dependent Kinase 20                                                            | Protein Coding | 49 | GC09M087966 | 1.091133595 | <a href="https://www.genecards.org/cgi-bin/carddisp.pl?gene=CDK20">https://www.genecards.org/cgi-bin/carddisp.pl?gene=CDK20</a>     |
| PTPRR   | Protein Tyrosine Phosphatase Receptor Type R                                          | Protein Coding | 45 | GC12M070638 | 1.091133595 | <a href="https://www.genecards.org/cgi-bin/carddisp.pl?gene=PTPRR">https://www.genecards.org/cgi-bin/carddisp.pl?gene=PTPRR</a>     |
| ZFP36L1 | ZFP36 Ring Finger Protein Like 1                                                      | Protein Coding | 47 | GC14M068787 | 1.089681864 | <a href="https://www.genecards.org/cgi-bin/carddisp.pl?gene=ZFP36L1">https://www.genecards.org/cgi-bin/carddisp.pl?gene=ZFP36L1</a> |
| RAP1B   | RAP1B, Member Of RAS Oncogene Family                                                  | Protein Coding | 50 | GC12P068610 | 1.089631319 | <a href="https://www.genecards.org/cgi-bin/carddisp.pl?gene=RAP1B">https://www.genecards.org/cgi-bin/carddisp.pl?gene=RAP1B</a>     |
| STMN2   | Stathmin 2                                                                            | Protein Coding | 45 | GC08P079610 | 1.086361289 | <a href="https://www.genecards.org/cgi-bin/carddisp.pl?gene=STMN2">https://www.genecards.org/cgi-bin/carddisp.pl?gene=STMN2</a>     |
| ADGRE5  | Adhesion G Protein-Coupled Receptor E5                                                | Protein Coding | 51 | GC19P014880 | 1.082407951 | <a href="https://www.genecards.org/cgi-bin/carddisp.pl?gene=ADGRE5">https://www.genecards.org/cgi-bin/carddisp.pl?gene=ADGRE5</a>   |
| GDF5    | Growth Differentiation Factor 5                                                       | Protein Coding | 52 | GC20M035433 | 1.08078897  | <a href="https://www.genecards.org/cgi-bin/carddisp.pl?gene=GDF5">https://www.genecards.org/cgi-bin/carddisp.pl?gene=GDF5</a>       |
| VAV3    | Vav Guanine Nucleotide Exchange Factor 3                                              | Protein Coding | 50 | GC01M107571 | 1.078908563 | <a href="https://www.genecards.org/cgi-bin/carddisp.pl?gene=VAV3">https://www.genecards.org/cgi-bin/carddisp.pl?gene=VAV3</a>       |
| F2RL2   | Coagulation Factor II Thrombin Receptor Like 2                                        | Protein Coding | 47 | GC05M076615 | 1.078908563 | <a href="https://www.genecards.org/cgi-bin/carddisp.pl?gene=F2RL2">https://www.genecards.org/cgi-bin/carddisp.pl?gene=F2RL2</a>     |
| ANGPTL1 | Angiopoietin Like 1                                                                   | Protein Coding | 46 | GC01M178849 | 1.078908563 | <a href="https://www.genecards.org/cgi-bin/carddisp.pl?gene=ANGPTL1">https://www.genecards.org/cgi-bin/carddisp.pl?gene=ANGPTL1</a> |
| RGS16   | Regulator Of G Protein Signaling 16                                                   | Protein Coding | 46 | GC01M182598 | 1.078908563 | <a href="https://www.genecards.org/cgi-bin/carddisp.pl?gene=RGS16">https://www.genecards.org/cgi-bin/carddisp.pl?gene=RGS16</a>     |

|        |                                                  |                |    |             |             |                                                                                                                                   |
|--------|--------------------------------------------------|----------------|----|-------------|-------------|-----------------------------------------------------------------------------------------------------------------------------------|
| OAS3   | 2'-5'-Oligoadenylate Synthetase 3                | Protein Coding | 46 | GC12P112938 | 1.077958465 | <a href="https://www.genecards.org/cgi-bin/carddisp.pl?gene=OAS3">https://www.genecards.org/cgi-bin/carddisp.pl?gene=OAS3</a>     |
| NMT2   | N-Myristoyltransferase 2                         | Protein Coding | 45 | GC10M015206 | 1.072276354 | <a href="https://www.genecards.org/cgi-bin/carddisp.pl?gene=NMT2">https://www.genecards.org/cgi-bin/carddisp.pl?gene=NMT2</a>     |
| PTPRZ1 | Protein Tyrosine Phosphatase Receptor Type Z1    | Protein Coding | 52 | GC07P121873 | 1.068503141 | <a href="https://www.genecards.org/cgi-bin/carddisp.pl?gene=PTPRZ1">https://www.genecards.org/cgi-bin/carddisp.pl?gene=PTPRZ1</a> |
| PTPN4  | Protein Tyrosine Phosphatase Non-Receptor Type 4 | Protein Coding | 47 | GC02P119759 | 1.068503141 | <a href="https://www.genecards.org/cgi-bin/carddisp.pl?gene=PTPN4">https://www.genecards.org/cgi-bin/carddisp.pl?gene=PTPN4</a>   |
| MT1E   | Metallothionein 1E                               | Protein Coding | 43 | GC16P056625 | 1.067718744 | <a href="https://www.genecards.org/cgi-bin/carddisp.pl?gene=MT1E">https://www.genecards.org/cgi-bin/carddisp.pl?gene=MT1E</a>     |
| F2RL3  | F2R Like Thrombin Or Trypsin Receptor 3          | Protein Coding | 53 | GC19P016888 | 1.067248344 | <a href="https://www.genecards.org/cgi-bin/carddisp.pl?gene=F2RL3">https://www.genecards.org/cgi-bin/carddisp.pl?gene=F2RL3</a>   |
| WWC1   | WW And C2 Domain Containing 1                    | Protein Coding | 47 | GC05P168291 | 1.058328509 | <a href="https://www.genecards.org/cgi-bin/carddisp.pl?gene=WWC1">https://www.genecards.org/cgi-bin/carddisp.pl?gene=WWC1</a>     |
| BTC    | Betacellulin                                     | Protein Coding | 51 | GC04M074744 | 1.054350853 | <a href="https://www.genecards.org/cgi-bin/carddisp.pl?gene=BTC">https://www.genecards.org/cgi-bin/carddisp.pl?gene=BTC</a>       |
| IRF9   | Interferon Regulatory Factor 9                   | Protein Coding | 51 | GC14P024161 | 1.054350853 | <a href="https://www.genecards.org/cgi-bin/carddisp.pl?gene=IRF9">https://www.genecards.org/cgi-bin/carddisp.pl?gene=IRF9</a>     |
| KRT15  | Keratin 15                                       | Protein Coding | 44 | GC17M041513 | 1.054350853 | <a href="https://www.genecards.org/cgi-bin/carddisp.pl?gene=KRT15">https://www.genecards.org/cgi-bin/carddisp.pl?gene=KRT15</a>   |
| GTF3A  | General Transcription Factor IIIA                | Protein Coding | 42 | GC13P027429 | 1.052797198 | <a href="https://www.genecards.org/cgi-bin/carddisp.pl?gene=GTF3A">https://www.genecards.org/cgi-bin/carddisp.pl?gene=GTF3A</a>   |
| C1S    | Complement C1s                                   | Protein Coding | 54 | GC12P023568 | 1.051964879 | <a href="https://www.genecards.org/cgi-bin/carddisp.pl?gene=C1S">https://www.genecards.org/cgi-bin/carddisp.pl?gene=C1S</a>       |
| UNC13C | Unc-13 Homolog C                                 | Protein Coding | 40 | GC15P053838 | 1.048702359 | <a href="https://www.genecards.org/cgi-bin/carddisp.pl?gene=UNC13C">https://www.genecards.org/cgi-bin/carddisp.pl?gene=UNC13C</a> |
| ITGB7  | Integrin Subunit Beta 7                          | Protein Coding | 52 | GC12M053191 | 1.042477012 | <a href="https://www.genecards.org/cgi-bin/carddisp.pl?gene=ITGB7">https://www.genecards.org/cgi-bin/carddisp.pl?gene=ITGB7</a>   |
| CD177  | CD177 Molecule                                   | Protein Coding | 46 | GC19P043353 | 1.040836096 | <a href="https://www.genecards.org/cgi-bin/carddisp.pl?gene=CD177">https://www.genecards.org/cgi-bin/carddisp.pl?gene=CD177</a>   |

|              |                                                            |                    |    |             |             |                                                                                                                                               |
|--------------|------------------------------------------------------------|--------------------|----|-------------|-------------|-----------------------------------------------------------------------------------------------------------------------------------------------|
| GSDMC        | Gasdermin C                                                | Protein Coding     | 40 | GC08M129705 | 1.03986001  | <a href="https://www.genecards.org/cgi-bin/carddisp.pl?gene=GSDMC">https://www.genecards.org/cgi-bin/carddisp.pl?gene=GSDMC</a>               |
| HRG          | Histidine Rich Glycoprotein                                | Protein Coding     | 52 | GC03P186660 | 1.039795876 | <a href="https://www.genecards.org/cgi-bin/carddisp.pl?gene=HRG">https://www.genecards.org/cgi-bin/carddisp.pl?gene=HRG</a>                   |
| EFNA5        | Ephrin A5                                                  | Protein Coding     | 51 | GC05M107376 | 1.039711475 | <a href="https://www.genecards.org/cgi-bin/carddisp.pl?gene=EFNA5">https://www.genecards.org/cgi-bin/carddisp.pl?gene=EFNA5</a>               |
| RASGRF1      | Ras Protein Specific Guanine Nucleotide Releasing Factor 1 | Protein Coding     | 50 | GC15M078959 | 1.039711475 | <a href="https://www.genecards.org/cgi-bin/carddisp.pl?gene=RASGRF1">https://www.genecards.org/cgi-bin/carddisp.pl?gene=RASGRF1</a>           |
| VAV2         | Vav Guanine Nucleotide Exchange Factor 2                   | Protein Coding     | 49 | GC09M133761 | 1.039711475 | <a href="https://www.genecards.org/cgi-bin/carddisp.pl?gene=VAV2">https://www.genecards.org/cgi-bin/carddisp.pl?gene=VAV2</a>                 |
| DSG3         | Desmoglein 3                                               | Protein Coding     | 48 | GC18P031447 | 1.039711475 | <a href="https://www.genecards.org/cgi-bin/carddisp.pl?gene=DSG3">https://www.genecards.org/cgi-bin/carddisp.pl?gene=DSG3</a>                 |
| NCK2         | NCK Adaptor Protein 2                                      | Protein Coding     | 48 | GC02P105744 | 1.039711475 | <a href="https://www.genecards.org/cgi-bin/carddisp.pl?gene=NCK2">https://www.genecards.org/cgi-bin/carddisp.pl?gene=NCK2</a>                 |
| SLAMF6       | SLAM Family Member 6                                       | Protein Coding     | 47 | GC01M160454 | 1.039711475 | <a href="https://www.genecards.org/cgi-bin/carddisp.pl?gene=SLAMF6">https://www.genecards.org/cgi-bin/carddisp.pl?gene=SLAMF6</a>             |
| GEM          | GTP Binding Protein Overexpressed In Skeletal Muscle       | Protein Coding     | 46 | GC08M094249 | 1.039711475 | <a href="https://www.genecards.org/cgi-bin/carddisp.pl?gene=GEM">https://www.genecards.org/cgi-bin/carddisp.pl?gene=GEM</a>                   |
| RHBDF1       | Rhomoid 5 Homolog 1                                        | Protein Coding     | 45 | GC16M000058 | 1.039711475 | <a href="https://www.genecards.org/cgi-bin/carddisp.pl?gene=RHBDF1">https://www.genecards.org/cgi-bin/carddisp.pl?gene=RHBDF1</a>             |
| SIGLEC12     | Sialic Acid Binding Ig Like Lectin 12                      | Protein Coding     | 45 | GC19M051491 | 1.039711475 | <a href="https://www.genecards.org/cgi-bin/carddisp.pl?gene=SIGLEC12">https://www.genecards.org/cgi-bin/carddisp.pl?gene=SIGLEC12</a>         |
| ERRFI1       | ERBB Receptor Feedback Inhibitor 1                         | Protein Coding     | 43 | GC01M008004 | 1.039711475 | <a href="https://www.genecards.org/cgi-bin/carddisp.pl?gene=ERRFI1">https://www.genecards.org/cgi-bin/carddisp.pl?gene=ERRFI1</a>             |
| GRM8         | Glutamate Metabotropic Receptor 8                          | Protein Coding     | 53 | GC07M126438 | 1.037789106 | <a href="https://www.genecards.org/cgi-bin/carddisp.pl?gene=GRM8">https://www.genecards.org/cgi-bin/carddisp.pl?gene=GRM8</a>                 |
| IL17RD       | Interleukin 17 Receptor D                                  | Protein Coding     | 52 | GC03M057089 | 1.029799223 | <a href="https://www.genecards.org/cgi-bin/carddisp.pl?gene=IL17RD">https://www.genecards.org/cgi-bin/carddisp.pl?gene=IL17RD</a>             |
| LOC111674472 | DNase I Hypersensitive Sites In Introns 16 And 17a Of CFTR | Functional Element | 4  | GC07P117607 | 1.027813554 | <a href="https://www.genecards.org/cgi-bin/carddisp.pl?gene=LOC111674472">https://www.genecards.org/cgi-bin/carddisp.pl?gene=LOC111674472</a> |



|         |                                                                      |                |    |             |             |                                                                                                                                     |
|---------|----------------------------------------------------------------------|----------------|----|-------------|-------------|-------------------------------------------------------------------------------------------------------------------------------------|
| NRCAM   | Neuronal Cell Adhesion Molecule                                      | Protein Coding | 51 | GC07M108147 | 1.022346497 | <a href="https://www.genecards.org/cgi-bin/carddisp.pl?gene=NRCAM">https://www.genecards.org/cgi-bin/carddisp.pl?gene=NRCAM</a>     |
| CD300A  | CD300a Molecule                                                      | Protein Coding | 47 | GC17P074466 | 1.022346497 | <a href="https://www.genecards.org/cgi-bin/carddisp.pl?gene=CD300A">https://www.genecards.org/cgi-bin/carddisp.pl?gene=CD300A</a>   |
| HTN3    | Histatin 3                                                           | Protein Coding | 38 | GC04P070028 | 1.022087574 | <a href="https://www.genecards.org/cgi-bin/carddisp.pl?gene=HTN3">https://www.genecards.org/cgi-bin/carddisp.pl?gene=HTN3</a>       |
| GJA4    | Gap Junction Protein Alpha 4                                         | Protein Coding | 50 | GC01P034792 | 1.019160032 | <a href="https://www.genecards.org/cgi-bin/carddisp.pl?gene=GJA4">https://www.genecards.org/cgi-bin/carddisp.pl?gene=GJA4</a>       |
| EPHA5   | EPH Receptor A5                                                      | Protein Coding | 53 | GC04M065319 | 1.013868332 | <a href="https://www.genecards.org/cgi-bin/carddisp.pl?gene=EPHA5">https://www.genecards.org/cgi-bin/carddisp.pl?gene=EPHA5</a>     |
| CDKL1   | Cyclin Dependent Kinase Like 1                                       | Protein Coding | 46 | GC14M050330 | 1.013868332 | <a href="https://www.genecards.org/cgi-bin/carddisp.pl?gene=CDKL1">https://www.genecards.org/cgi-bin/carddisp.pl?gene=CDKL1</a>     |
| SEMA3B  | Semaphorin 3B                                                        | Protein Coding | 47 | GC03P050267 | 1.013504267 | <a href="https://www.genecards.org/cgi-bin/carddisp.pl?gene=SEMA3B">https://www.genecards.org/cgi-bin/carddisp.pl?gene=SEMA3B</a>   |
| METTL2B | Methyltransferase 2B, Methylcytidine                                 | Protein Coding | 40 | GC07P132479 | 1.013077974 | <a href="https://www.genecards.org/cgi-bin/carddisp.pl?gene=METTL2B">https://www.genecards.org/cgi-bin/carddisp.pl?gene=METTL2B</a> |
| PAG1    | Phosphoprotein Membrane Anchor With Glycosphingolipid Microdomains 1 | Protein Coding | 46 | GC08M080967 | 1.012400031 | <a href="https://www.genecards.org/cgi-bin/carddisp.pl?gene=PAG1">https://www.genecards.org/cgi-bin/carddisp.pl?gene=PAG1</a>       |
| INA     | Internexin Neuronal Intermediate Filament Protein Alpha              | Protein Coding | 45 | GC10P103277 | 1.011909842 | <a href="https://www.genecards.org/cgi-bin/carddisp.pl?gene=INA">https://www.genecards.org/cgi-bin/carddisp.pl?gene=INA</a>         |
| SLC17A6 | Solute Carrier Family 17 Member 6                                    | Protein Coding | 47 | GC11P022359 | 1.005619407 | <a href="https://www.genecards.org/cgi-bin/carddisp.pl?gene=SLC17A6">https://www.genecards.org/cgi-bin/carddisp.pl?gene=SLC17A6</a> |
| NPTX1   | Neuronal Pentraxin 1                                                 | Protein Coding | 47 | GC17M080466 | 1.002447128 | <a href="https://www.genecards.org/cgi-bin/carddisp.pl?gene=NPTX1">https://www.genecards.org/cgi-bin/carddisp.pl?gene=NPTX1</a>     |
| IL5RA   | Interleukin 5 Receptor Subunit Alpha                                 | Protein Coding | 53 | GC03M003066 | 1.001373172 | <a href="https://www.genecards.org/cgi-bin/carddisp.pl?gene=IL5RA">https://www.genecards.org/cgi-bin/carddisp.pl?gene=IL5RA</a>     |
| LGR6    | Leucine Rich Repeat Containing G Protein-Coupled Receptor 6          | Protein Coding | 48 | GC01P202193 | 1.000739813 | <a href="https://www.genecards.org/cgi-bin/carddisp.pl?gene=LGR6">https://www.genecards.org/cgi-bin/carddisp.pl?gene=LGR6</a>       |
| SNX1    | Sorting Nexin 1                                                      | Protein Coding | 46 | GC15P064094 | 1.000739813 | <a href="https://www.genecards.org/cgi-bin/carddisp.pl?gene=SNX1">https://www.genecards.org/cgi-bin/carddisp.pl?gene=SNX1</a>       |

|             |                                                                                      |                |    |             |             |                                                                                                                                             |
|-------------|--------------------------------------------------------------------------------------|----------------|----|-------------|-------------|---------------------------------------------------------------------------------------------------------------------------------------------|
| KIR2DL3     | Killer Cell Immunoglobulin Like Receptor, Two Ig Domains And Long Cytoplasmic Tail 3 | Protein Coding | 43 | GC19P074381 | 1.000186682 | <a href="https://www.genecards.org/cgi-bin/carddisp.pl?gene=KIR2DL3">https://www.genecards.org/cgi-bin/carddisp.pl?gene=KIR2DL3</a>         |
| KLRB1       | Killer Cell Lectin Like Receptor B1                                                  | Protein Coding | 47 | GC12M022622 | 0.999716043 | <a href="https://www.genecards.org/cgi-bin/carddisp.pl?gene=KLRB1">https://www.genecards.org/cgi-bin/carddisp.pl?gene=KLRB1</a>             |
| PITX3       | Paired Like Homeodomain 3                                                            | Protein Coding | 46 | GC10M102230 | 0.999716043 | <a href="https://www.genecards.org/cgi-bin/carddisp.pl?gene=PITX3">https://www.genecards.org/cgi-bin/carddisp.pl?gene=PITX3</a>             |
| GPR182      | G Protein-Coupled Receptor 182                                                       | Protein Coding | 44 | GC12P056994 | 0.999716043 | <a href="https://www.genecards.org/cgi-bin/carddisp.pl?gene=GPR182">https://www.genecards.org/cgi-bin/carddisp.pl?gene=GPR182</a>           |
| CHRNE       | Cholinergic Receptor Nicotinic Epsilon Subunit                                       | Protein Coding | 51 | GC17M004897 | 0.999406278 | <a href="https://www.genecards.org/cgi-bin/carddisp.pl?gene=CHRNE">https://www.genecards.org/cgi-bin/carddisp.pl?gene=CHRNE</a>             |
| TUB         | TUB Bipartite Transcription Factor                                                   | Protein Coding | 50 | GC11P008040 | 0.994702637 | <a href="https://www.genecards.org/cgi-bin/carddisp.pl?gene=TUB">https://www.genecards.org/cgi-bin/carddisp.pl?gene=TUB</a>                 |
| EPS8        | Epidermal Growth Factor Receptor Pathway Substrate 8                                 | Protein Coding | 52 | GC12M022709 | 0.987842262 | <a href="https://www.genecards.org/cgi-bin/carddisp.pl?gene=EPS8">https://www.genecards.org/cgi-bin/carddisp.pl?gene=EPS8</a>               |
| UBASH3B     | Ubiquitin Associated And SH3 Domain Containing B                                     | Protein Coding | 48 | GC11P122655 | 0.987842262 | <a href="https://www.genecards.org/cgi-bin/carddisp.pl?gene=UBASH3B">https://www.genecards.org/cgi-bin/carddisp.pl?gene=UBASH3B</a>         |
| ASAP1       | ArfGAP With SH3 Domain, Ankyrin Repeat And PH Domain 1                               | Protein Coding | 47 | GC08M130052 | 0.987842262 | <a href="https://www.genecards.org/cgi-bin/carddisp.pl?gene=ASAP1">https://www.genecards.org/cgi-bin/carddisp.pl?gene=ASAP1</a>             |
| SKAP2       | Src Kinase Associated Phosphoprotein 2                                               | Protein Coding | 46 | GC07M026654 | 0.987842262 | <a href="https://www.genecards.org/cgi-bin/carddisp.pl?gene=SKAP2">https://www.genecards.org/cgi-bin/carddisp.pl?gene=SKAP2</a>             |
| KCNA2       | Potassium Voltage-Gated Channel Subfamily A Member 2                                 | Protein Coding | 53 | GC01M110519 | 0.985289454 | <a href="https://www.genecards.org/cgi-bin/carddisp.pl?gene=KCNA2">https://www.genecards.org/cgi-bin/carddisp.pl?gene=KCNA2</a>             |
| IGF2BP2-AS1 | IGF2BP2 Antisense RNA 1                                                              | RNA Gene       | 26 | GC03P185620 | 0.982193828 | <a href="https://www.genecards.org/cgi-bin/carddisp.pl?gene=IGF2BP2-AS1">https://www.genecards.org/cgi-bin/carddisp.pl?gene=IGF2BP2-AS1</a> |
| SKAP1       | Src Kinase Associated Phosphoprotein 1                                               | Protein Coding | 45 | GC17M048133 | 0.980487883 | <a href="https://www.genecards.org/cgi-bin/carddisp.pl?gene=SKAP1">https://www.genecards.org/cgi-bin/carddisp.pl?gene=SKAP1</a>             |
| NAA60       | N-Alpha-Acetyltransferase 60, NatF Catalytic Subunit                                 | Protein Coding | 43 | GC16P003443 | 0.97929728  | <a href="https://www.genecards.org/cgi-bin/carddisp.pl?gene=NAA60">https://www.genecards.org/cgi-bin/carddisp.pl?gene=NAA60</a>             |
| PURA        | Purine Rich Element Binding Protein A                                                | Protein Coding | 51 | GC05P140076 | 0.976546884 | <a href="https://www.genecards.org/cgi-bin/carddisp.pl?gene=PURA">https://www.genecards.org/cgi-bin/carddisp.pl?gene=PURA</a>               |

|         |                                                    |                |    |             |             |                                                                                                                                       |
|---------|----------------------------------------------------|----------------|----|-------------|-------------|---------------------------------------------------------------------------------------------------------------------------------------|
| MEOX2   | Mesenchyme Homeobox 2                              | Protein Coding | 46 | GC07M015617 | 0.976295114 | <a href="https://www.genecards.org/cgi-bin/carddisp.pl?gene=MEOX2">https://www.genecards.org/cgi-bin/carddisp.pl?gene=MEOX2</a>       |
| OXER1   | Oxoecosanoid Receptor 1                            | Protein Coding | 45 | GC02M042762 | 0.973202944 | <a href="https://www.genecards.org/cgi-bin/carddisp.pl?gene=OXER1">https://www.genecards.org/cgi-bin/carddisp.pl?gene=OXER1</a>       |
| GRIN3B  | Glutamate Ionotropic Receptor NMDA Type Subunit 3B | Protein Coding | 49 | GC19P001000 | 0.957497299 | <a href="https://www.genecards.org/cgi-bin/carddisp.pl?gene=GRIN3B">https://www.genecards.org/cgi-bin/carddisp.pl?gene=GRIN3B</a>     |
| RIN1    | Ras And Rab Interactor 1                           | Protein Coding | 44 | GC11M099757 | 0.955837965 | <a href="https://www.genecards.org/cgi-bin/carddisp.pl?gene=RIN1">https://www.genecards.org/cgi-bin/carddisp.pl?gene=RIN1</a>         |
| TOM1L1  | Target Of Myb1 Like 1 Membrane Trafficking Protein | Protein Coding | 42 | GC17P062999 | 0.955837965 | <a href="https://www.genecards.org/cgi-bin/carddisp.pl?gene=TOM1L1">https://www.genecards.org/cgi-bin/carddisp.pl?gene=TOM1L1</a>     |
| SH3BGRL | SH3 Domain Binding Glutamate Rich Protein Like 2   | Protein Coding | 40 | GC06P092694 | 0.955837965 | <a href="https://www.genecards.org/cgi-bin/carddisp.pl?gene=SH3BGRL2">https://www.genecards.org/cgi-bin/carddisp.pl?gene=SH3BGRL2</a> |
| FZD9    | Frizzled Class Receptor 9                          | Protein Coding | 51 | GC07P073433 | 0.95253402  | <a href="https://www.genecards.org/cgi-bin/carddisp.pl?gene=FZD9">https://www.genecards.org/cgi-bin/carddisp.pl?gene=FZD9</a>         |
| CADM2   | Cell Adhesion Molecule 2                           | Protein Coding | 47 | GC03P084961 | 0.952244639 | <a href="https://www.genecards.org/cgi-bin/carddisp.pl?gene=CADM2">https://www.genecards.org/cgi-bin/carddisp.pl?gene=CADM2</a>       |
| NUDT6   | Nudix Hydrolase 6                                  | Protein Coding | 43 | GC04M122888 | 0.950953603 | <a href="https://www.genecards.org/cgi-bin/carddisp.pl?gene=NUDT6">https://www.genecards.org/cgi-bin/carddisp.pl?gene=NUDT6</a>       |
| ZDHHC3  | Zinc Finger DHHC-Type Palmitoyltransferase 3       | Protein Coding | 43 | GC03M044915 | 0.950109363 | <a href="https://www.genecards.org/cgi-bin/carddisp.pl?gene=ZDHHC3">https://www.genecards.org/cgi-bin/carddisp.pl?gene=ZDHHC3</a>     |
| PCDH15  | Protocadherin Related 15                           | Protein Coding | 48 | GC10M053802 | 0.946790814 | <a href="https://www.genecards.org/cgi-bin/carddisp.pl?gene=PCDH15">https://www.genecards.org/cgi-bin/carddisp.pl?gene=PCDH15</a>     |
| HGFAC   | HGF Activator                                      | Protein Coding | 48 | GC04P003443 | 0.945081234 | <a href="https://www.genecards.org/cgi-bin/carddisp.pl?gene=HGFAC">https://www.genecards.org/cgi-bin/carddisp.pl?gene=HGFAC</a>       |
| PLXNC1  | Plexin C1                                          | Protein Coding | 47 | GC12P094150 | 0.945081234 | <a href="https://www.genecards.org/cgi-bin/carddisp.pl?gene=PLXNC1">https://www.genecards.org/cgi-bin/carddisp.pl?gene=PLXNC1</a>     |
| SLA2    | Src Like Adaptor 2                                 | Protein Coding | 46 | GC20M036613 | 0.945081234 | <a href="https://www.genecards.org/cgi-bin/carddisp.pl?gene=SLA2">https://www.genecards.org/cgi-bin/carddisp.pl?gene=SLA2</a>         |
| LILRB4  | Leukocyte Immunoglobulin Like Receptor B4          | Protein Coding | 44 | GC19P054643 | 0.945081234 | <a href="https://www.genecards.org/cgi-bin/carddisp.pl?gene=LILRB4">https://www.genecards.org/cgi-bin/carddisp.pl?gene=LILRB4</a>     |

|         |                                                          |                |    |             |             |                                                                                                                                     |
|---------|----------------------------------------------------------|----------------|----|-------------|-------------|-------------------------------------------------------------------------------------------------------------------------------------|
| RASA3   | RAS P21 Protein Activator 3                              | Protein Coding | 44 | GC13M113977 | 0.945081234 | <a href="https://www.genecards.org/cgi-bin/carddisp.pl?gene=RASA3">https://www.genecards.org/cgi-bin/carddisp.pl?gene=RASA3</a>     |
| FCGR2C  | Fc Gamma Receptor IIc (Gene/Pseudogene)                  | Protein Coding | 40 | GC01P161818 | 0.945081234 | <a href="https://www.genecards.org/cgi-bin/carddisp.pl?gene=FCGR2C">https://www.genecards.org/cgi-bin/carddisp.pl?gene=FCGR2C</a>   |
| SPAG4   | Sperm Associated Antigen 4                               | Protein Coding | 40 | GC20P035615 | 0.945081234 | <a href="https://www.genecards.org/cgi-bin/carddisp.pl?gene=SPAG4">https://www.genecards.org/cgi-bin/carddisp.pl?gene=SPAG4</a>     |
| GYPE    | Glycophorin E (MNS Blood Group)                          | Protein Coding | 35 | GC04M143870 | 0.941309452 | <a href="https://www.genecards.org/cgi-bin/carddisp.pl?gene=GYPE">https://www.genecards.org/cgi-bin/carddisp.pl?gene=GYPE</a>       |
| GFRA3   | GDNF Family Receptor Alpha 3                             | Protein Coding | 50 | GC05M138263 | 0.933207512 | <a href="https://www.genecards.org/cgi-bin/carddisp.pl?gene=GFRA3">https://www.genecards.org/cgi-bin/carddisp.pl?gene=GFRA3</a>     |
| GRAP2   | GRB2 Related Adaptor Protein 2                           | Protein Coding | 50 | GC22P045214 | 0.933207512 | <a href="https://www.genecards.org/cgi-bin/carddisp.pl?gene=GRAP2">https://www.genecards.org/cgi-bin/carddisp.pl?gene=GRAP2</a>     |
| STON2   | Stonin 2                                                 | Protein Coding | 41 | GC14M081260 | 0.933207512 | <a href="https://www.genecards.org/cgi-bin/carddisp.pl?gene=STON2">https://www.genecards.org/cgi-bin/carddisp.pl?gene=STON2</a>     |
| GNRH2   | Gonadotropin Releasing Hormone 2                         | Protein Coding | 40 | GC20P003043 | 0.933207512 | <a href="https://www.genecards.org/cgi-bin/carddisp.pl?gene=GNRH2">https://www.genecards.org/cgi-bin/carddisp.pl?gene=GNRH2</a>     |
| MSLN    | Mesothelin                                               | Protein Coding | 50 | GC16P013455 | 0.93258357  | <a href="https://www.genecards.org/cgi-bin/carddisp.pl?gene=MSLN">https://www.genecards.org/cgi-bin/carddisp.pl?gene=MSLN</a>       |
| ECE2    | Endothelin Converting Enzyme 2                           | Protein Coding | 46 | GC03P184276 | 0.928997397 | <a href="https://www.genecards.org/cgi-bin/carddisp.pl?gene=ECE2">https://www.genecards.org/cgi-bin/carddisp.pl?gene=ECE2</a>       |
| S100G   | S100 Calcium Binding Protein G                           | Protein Coding | 42 | GC0XP016668 | 0.925257087 | <a href="https://www.genecards.org/cgi-bin/carddisp.pl?gene=S100G">https://www.genecards.org/cgi-bin/carddisp.pl?gene=S100G</a>     |
| COL17A1 | Collagen Type XVII Alpha 1 Chain                         | Protein Coding | 51 | GC10M104031 | 0.92325455  | <a href="https://www.genecards.org/cgi-bin/carddisp.pl?gene=COL17A1">https://www.genecards.org/cgi-bin/carddisp.pl?gene=COL17A1</a> |
| LNX1    | Ligand Of Numb-Protein X 1                               | Protein Coding | 48 | GC04M053459 | 0.92325455  | <a href="https://www.genecards.org/cgi-bin/carddisp.pl?gene=LNX1">https://www.genecards.org/cgi-bin/carddisp.pl?gene=LNX1</a>       |
| GPR17   | G Protein-Coupled Receptor 17                            | Protein Coding | 48 | GC02P127645 | 0.922787964 | <a href="https://www.genecards.org/cgi-bin/carddisp.pl?gene=GPR17">https://www.genecards.org/cgi-bin/carddisp.pl?gene=GPR17</a>     |
| UBE2NL  | Ubiquitin Conjugating Enzyme E2 N Like (Gene/Pseudogene) | Protein Coding | 31 | GC0XP143884 | 0.920240343 | <a href="https://www.genecards.org/cgi-bin/carddisp.pl?gene=UBE2NL">https://www.genecards.org/cgi-bin/carddisp.pl?gene=UBE2NL</a>   |

|              |                                                                          |                    |    |             |             |                                                                                                                                               |
|--------------|--------------------------------------------------------------------------|--------------------|----|-------------|-------------|-----------------------------------------------------------------------------------------------------------------------------------------------|
| AKAP5        | A-Kinase Anchoring Protein 5                                             | Protein Coding     | 47 | GC14P064465 | 0.917392969 | <a href="https://www.genecards.org/cgi-bin/carddisp.pl?gene=AKAP5">https://www.genecards.org/cgi-bin/carddisp.pl?gene=AKAP5</a>               |
| DAB1         | DAB Adaptor Protein 1                                                    | Protein Coding     | 50 | GC01M056994 | 0.912124336 | <a href="https://www.genecards.org/cgi-bin/carddisp.pl?gene=DAB1">https://www.genecards.org/cgi-bin/carddisp.pl?gene=DAB1</a>                 |
| AFDN         | Afadin, Adherens Junction Formation Factor                               | Protein Coding     | 48 | GC06P167827 | 0.912124336 | <a href="https://www.genecards.org/cgi-bin/carddisp.pl?gene=AFDN">https://www.genecards.org/cgi-bin/carddisp.pl?gene=AFDN</a>                 |
| SLC9A6       | Solute Carrier Family 9 Member A6                                        | Protein Coding     | 53 | GC0XP135985 | 0.905902743 | <a href="https://www.genecards.org/cgi-bin/carddisp.pl?gene=SLC9A6">https://www.genecards.org/cgi-bin/carddisp.pl?gene=SLC9A6</a>             |
| ZDHHC7       | Zinc Finger DHHC-Type Palmitoyltransferase 7                             | Protein Coding     | 43 | GC16M084975 | 0.905520856 | <a href="https://www.genecards.org/cgi-bin/carddisp.pl?gene=ZDHHC7">https://www.genecards.org/cgi-bin/carddisp.pl?gene=ZDHHC7</a>             |
| ZDHHC4       | Zinc Finger DHHC-Type Palmitoyltransferase 4                             | Protein Coding     | 40 | GC07P006577 | 0.905520856 | <a href="https://www.genecards.org/cgi-bin/carddisp.pl?gene=ZDHHC4">https://www.genecards.org/cgi-bin/carddisp.pl?gene=ZDHHC4</a>             |
| JMJD6        | Jumonji Domain Containing 6, Arginine Demethylase And Lysine Hydroxylase | Protein Coding     | 49 | GC17M076718 | 0.904907465 | <a href="https://www.genecards.org/cgi-bin/carddisp.pl?gene=JMJD6">https://www.genecards.org/cgi-bin/carddisp.pl?gene=JMJD6</a>               |
| METAP2       | Methionyl Aminopeptidase 2                                               | Protein Coding     | 52 | GC12P095473 | 0.903258324 | <a href="https://www.genecards.org/cgi-bin/carddisp.pl?gene=METAP2">https://www.genecards.org/cgi-bin/carddisp.pl?gene=METAP2</a>             |
| ABT1         | Activator Of Basal Transcription 1                                       | Protein Coding     | 41 | GC06P091965 | 0.903258324 | <a href="https://www.genecards.org/cgi-bin/carddisp.pl?gene=ABT1">https://www.genecards.org/cgi-bin/carddisp.pl?gene=ABT1</a>                 |
| EDN2         | Endothelin 2                                                             | Protein Coding     | 47 | GC01M041478 | 0.900304377 | <a href="https://www.genecards.org/cgi-bin/carddisp.pl?gene=EDN2">https://www.genecards.org/cgi-bin/carddisp.pl?gene=EDN2</a>                 |
| ZC2HC1A      | Zinc Finger C2HC-Type Containing 1A                                      | Protein Coding     | 38 | GC08P078666 | 0.89760989  | <a href="https://www.genecards.org/cgi-bin/carddisp.pl?gene=ZC2HC1A">https://www.genecards.org/cgi-bin/carddisp.pl?gene=ZC2HC1A</a>           |
| RAB39B       | RAB39B, Member RAS Oncogene Family                                       | Protein Coding     | 44 | GC0XM155259 | 0.896075845 | <a href="https://www.genecards.org/cgi-bin/carddisp.pl?gene=RAB39B">https://www.genecards.org/cgi-bin/carddisp.pl?gene=RAB39B</a>             |
| SLC24A3      | Solute Carrier Family 24 Member 3                                        | Protein Coding     | 46 | GC20P019212 | 0.889909029 | <a href="https://www.genecards.org/cgi-bin/carddisp.pl?gene=SLC24A3">https://www.genecards.org/cgi-bin/carddisp.pl?gene=SLC24A3</a>           |
| DRAM1        | DNA Damage Regulated Autophagy Modulator 1                               | Protein Coding     | 37 | GC12P101877 | 0.887507498 | <a href="https://www.genecards.org/cgi-bin/carddisp.pl?gene=DRAM1">https://www.genecards.org/cgi-bin/carddisp.pl?gene=DRAM1</a>               |
| LOC108663987 | Ataxin 3 Repeat Instability Region                                       | Functional Element | 4  | GC14P092071 | 0.887507498 | <a href="https://www.genecards.org/cgi-bin/carddisp.pl?gene=LOC108663987">https://www.genecards.org/cgi-bin/carddisp.pl?gene=LOC108663987</a> |

|         |                                                                  |                |    |             |             |                                                                                                                                     |
|---------|------------------------------------------------------------------|----------------|----|-------------|-------------|-------------------------------------------------------------------------------------------------------------------------------------|
| ERBIN   | ErbB2 Interacting Protein                                        | Protein Coding | 46 | GC05P065884 | 0.88390404  | <a href="https://www.genecards.org/cgi-bin/carddisp.pl?gene=ERBIN">https://www.genecards.org/cgi-bin/carddisp.pl?gene=ERBIN</a>     |
| TRPC4   | Transient Receptor Potential Cation Channel Subfamily C Member 4 | Protein Coding | 50 | GC13M037638 | 0.878572762 | <a href="https://www.genecards.org/cgi-bin/carddisp.pl?gene=TRPC4">https://www.genecards.org/cgi-bin/carddisp.pl?gene=TRPC4</a>     |
| ARTN    | Artemin                                                          | Protein Coding | 47 | GC01P043933 | 0.878572762 | <a href="https://www.genecards.org/cgi-bin/carddisp.pl?gene=ARTN">https://www.genecards.org/cgi-bin/carddisp.pl?gene=ARTN</a>       |
| LILRA4  | Leukocyte Immunoglobulin Like Receptor A4                        | Protein Coding | 46 | GC19M054333 | 0.878572762 | <a href="https://www.genecards.org/cgi-bin/carddisp.pl?gene=LILRA4">https://www.genecards.org/cgi-bin/carddisp.pl?gene=LILRA4</a>   |
| MUC3B   | Mucin 3B, Cell Surface Associated                                | Protein Coding | 22 | GC07U903146 | 0.878572762 | <a href="https://www.genecards.org/cgi-bin/carddisp.pl?gene=MUC3B">https://www.genecards.org/cgi-bin/carddisp.pl?gene=MUC3B</a>     |
| ATP6V1D | ATPase H <sup>+</sup> Transporting V1 Subunit D                  | Protein Coding | 47 | GC14M067294 | 0.878209412 | <a href="https://www.genecards.org/cgi-bin/carddisp.pl?gene=ATP6V1D">https://www.genecards.org/cgi-bin/carddisp.pl?gene=ATP6V1D</a> |
| MMP25   | Matrix Metalloproteinase 25                                      | Protein Coding | 47 | GC16P013548 | 0.873746693 | <a href="https://www.genecards.org/cgi-bin/carddisp.pl?gene=MMP25">https://www.genecards.org/cgi-bin/carddisp.pl?gene=MMP25</a>     |
| NTN1    | Netrin 1                                                         | Protein Coding | 52 | GC17P011813 | 0.873181343 | <a href="https://www.genecards.org/cgi-bin/carddisp.pl?gene=NTN1">https://www.genecards.org/cgi-bin/carddisp.pl?gene=NTN1</a>       |
| ZMYM2   | Zinc Finger MYM-Type Containing 2                                | Protein Coding | 48 | GC13P020139 | 0.873181343 | <a href="https://www.genecards.org/cgi-bin/carddisp.pl?gene=ZMYM2">https://www.genecards.org/cgi-bin/carddisp.pl?gene=ZMYM2</a>     |
| P2RX1   | Purinergic Receptor P2X 1                                        | Protein Coding | 50 | GC17M003896 | 0.867829382 | <a href="https://www.genecards.org/cgi-bin/carddisp.pl?gene=P2RX1">https://www.genecards.org/cgi-bin/carddisp.pl?gene=P2RX1</a>     |
| CNTN2   | Contactin 2                                                      | Protein Coding | 52 | GC01P205043 | 0.861521125 | <a href="https://www.genecards.org/cgi-bin/carddisp.pl?gene=CNTN2">https://www.genecards.org/cgi-bin/carddisp.pl?gene=CNTN2</a>     |
| LILRB1  | Leukocyte Immunoglobulin Like Receptor B1                        | Protein Coding | 50 | GC19P073495 | 0.861521125 | <a href="https://www.genecards.org/cgi-bin/carddisp.pl?gene=LILRB1">https://www.genecards.org/cgi-bin/carddisp.pl?gene=LILRB1</a>   |
| PAEP    | Progesterone Associated Endometrial Protein                      | Protein Coding | 47 | GC09P135561 | 0.861521125 | <a href="https://www.genecards.org/cgi-bin/carddisp.pl?gene=PAEP">https://www.genecards.org/cgi-bin/carddisp.pl?gene=PAEP</a>       |
| TOB1    | Transducer Of ERBB2, 1                                           | Protein Coding | 47 | GC17M050862 | 0.861521125 | <a href="https://www.genecards.org/cgi-bin/carddisp.pl?gene=TOB1">https://www.genecards.org/cgi-bin/carddisp.pl?gene=TOB1</a>       |
| SLC17A7 | Solute Carrier Family 17 Member 7                                | Protein Coding | 47 | GC19M049429 | 0.850808859 | <a href="https://www.genecards.org/cgi-bin/carddisp.pl?gene=SLC17A7">https://www.genecards.org/cgi-bin/carddisp.pl?gene=SLC17A7</a> |

|   |          |                                          |                |    |             |             |                                                                                                                                         |
|---|----------|------------------------------------------|----------------|----|-------------|-------------|-----------------------------------------------------------------------------------------------------------------------------------------|
|   | RXFP1    | Relaxin Family Peptide Receptor 1        | Protein Coding | 51 | GC04P158315 | 0.848623574 | <a href="https://www.genecards.org/cgi-bin/carddisp.pl?gene=RXFP1">https://www.genecards.org/cgi-bin/carddisp.pl?gene=RXFP1</a>         |
| 5 | ARHGAP3  | Rho GTPase Activating Protein 35         | Protein Coding | 46 | GC19P046860 | 0.848623574 | <a href="https://www.genecards.org/cgi-bin/carddisp.pl?gene=ARHGAP35">https://www.genecards.org/cgi-bin/carddisp.pl?gene=ARHGAP35</a>   |
|   | SHC3     | SHC Adaptor Protein 3                    | Protein Coding | 46 | GC09M089005 | 0.848623574 | <a href="https://www.genecards.org/cgi-bin/carddisp.pl?gene=SHC3">https://www.genecards.org/cgi-bin/carddisp.pl?gene=SHC3</a>           |
|   | SWAP70   | Switching B Cell Complex Subunit SWAP70  | Protein Coding | 46 | GC11P009664 | 0.848623574 | <a href="https://www.genecards.org/cgi-bin/carddisp.pl?gene=SWAP70">https://www.genecards.org/cgi-bin/carddisp.pl?gene=SWAP70</a>       |
|   | SH2D2A   | SH2 Domain Containing 2A                 | Protein Coding | 45 | GC01M156952 | 0.848623574 | <a href="https://www.genecards.org/cgi-bin/carddisp.pl?gene=SH2D2A">https://www.genecards.org/cgi-bin/carddisp.pl?gene=SH2D2A</a>       |
|   | SH3BP5   | SH3 Domain Binding Protein 5             | Protein Coding | 44 | GC03M021849 | 0.848623574 | <a href="https://www.genecards.org/cgi-bin/carddisp.pl?gene=SH3BP5">https://www.genecards.org/cgi-bin/carddisp.pl?gene=SH3BP5</a>       |
|   | TCEAL1   | Transcription Elongation Factor A Like 1 | Protein Coding | 42 | GC0XP103628 | 0.848623574 | <a href="https://www.genecards.org/cgi-bin/carddisp.pl?gene=TCEAL1">https://www.genecards.org/cgi-bin/carddisp.pl?gene=TCEAL1</a>       |
|   | ETV7     | ETS Variant Transcription Factor 7       | Protein Coding | 40 | GC06M071871 | 0.848623574 | <a href="https://www.genecards.org/cgi-bin/carddisp.pl?gene=ETV7">https://www.genecards.org/cgi-bin/carddisp.pl?gene=ETV7</a>           |
| 7 | LOC34496 | Acyl-CoA Thioesterase 7 Pseudogene       | Pseudogene     | 15 | GC04M040045 | 0.848313689 | <a href="https://www.genecards.org/cgi-bin/carddisp.pl?gene=LOC344967">https://www.genecards.org/cgi-bin/carddisp.pl?gene=LOC344967</a> |
|   | KIF5C    | Kinesin Family Member 5C                 | Protein Coding | 48 | GC02P148875 | 0.842474699 | <a href="https://www.genecards.org/cgi-bin/carddisp.pl?gene=KIF5C">https://www.genecards.org/cgi-bin/carddisp.pl?gene=KIF5C</a>         |
|   | ANGPT4   | Angiopoietin 4                           | Protein Coding | 49 | GC20M000869 | 0.833984256 | <a href="https://www.genecards.org/cgi-bin/carddisp.pl?gene=ANGPT4">https://www.genecards.org/cgi-bin/carddisp.pl?gene=ANGPT4</a>       |
|   | DOK2     | Docking Protein 2                        | Protein Coding | 49 | GC08M021908 | 0.833984256 | <a href="https://www.genecards.org/cgi-bin/carddisp.pl?gene=DOK2">https://www.genecards.org/cgi-bin/carddisp.pl?gene=DOK2</a>           |
|   | CD48     | CD48 Molecule                            | Protein Coding | 47 | GC01M160648 | 0.833984256 | <a href="https://www.genecards.org/cgi-bin/carddisp.pl?gene=CD48">https://www.genecards.org/cgi-bin/carddisp.pl?gene=CD48</a>           |
|   | FCAR     | Fc Alpha Receptor                        | Protein Coding | 47 | GC19P073506 | 0.833984256 | <a href="https://www.genecards.org/cgi-bin/carddisp.pl?gene=FCAR">https://www.genecards.org/cgi-bin/carddisp.pl?gene=FCAR</a>           |
|   | ADRA1D   | Adrenoceptor Alpha 1D                    | Protein Coding | 51 | GC20M004220 | 0.828397751 | <a href="https://www.genecards.org/cgi-bin/carddisp.pl?gene=ADRA1D">https://www.genecards.org/cgi-bin/carddisp.pl?gene=ADRA1D</a>       |

|        |                                                           |                                                  |                |             |             |                                                                                                                                   |                                                                                                                                       |
|--------|-----------------------------------------------------------|--------------------------------------------------|----------------|-------------|-------------|-----------------------------------------------------------------------------------------------------------------------------------|---------------------------------------------------------------------------------------------------------------------------------------|
| CHRNA4 | Cholinergic Receptor Nicotinic Beta 4 Subunit             | Protein Coding                                   | 51             | GC15M078624 | 0.817885756 | <a href="https://www.genecards.org/cgi-bin/carddisp.pl?gene=CHRNA4">https://www.genecards.org/cgi-bin/carddisp.pl?gene=CHRNA4</a> |                                                                                                                                       |
| SLAMF1 | Signaling Lymphocytic Activation Molecule Family Member 1 | Protein Coding                                   | 49             | GC01M160608 | 0.816619277 | <a href="https://www.genecards.org/cgi-bin/carddisp.pl?gene=SLAMF1">https://www.genecards.org/cgi-bin/carddisp.pl?gene=SLAMF1</a> |                                                                                                                                       |
| EFNB3  | Ephrin B3                                                 | Protein Coding                                   | 48             | GC17P011746 | 0.816619277 | <a href="https://www.genecards.org/cgi-bin/carddisp.pl?gene=EFNB3">https://www.genecards.org/cgi-bin/carddisp.pl?gene=EFNB3</a>   |                                                                                                                                       |
| GRAP   | GRB2 Related Adaptor Protein                              | Protein Coding                                   | 48             | GC17M050970 | 0.816619277 | <a href="https://www.genecards.org/cgi-bin/carddisp.pl?gene=GRAP">https://www.genecards.org/cgi-bin/carddisp.pl?gene=GRAP</a>     |                                                                                                                                       |
| 2      | ARHGAP3                                                   | Rho GTPase Activating Protein 32                 | Protein Coding | 46          | GC11M128965 | 0.816619277                                                                                                                       | <a href="https://www.genecards.org/cgi-bin/carddisp.pl?gene=ARHGAP32">https://www.genecards.org/cgi-bin/carddisp.pl?gene=ARHGAP32</a> |
|        | SH2D1B                                                    | SH2 Domain Containing 1B                         | Protein Coding | 44          | GC01M162395 | 0.816619277                                                                                                                       | <a href="https://www.genecards.org/cgi-bin/carddisp.pl?gene=SH2D1B">https://www.genecards.org/cgi-bin/carddisp.pl?gene=SH2D1B</a>     |
|        | ERVW-1                                                    | Endogenous Retrovirus Group W Member 1, Envelope | Protein Coding | 42          | GC07M092468 | 0.816619277                                                                                                                       | <a href="https://www.genecards.org/cgi-bin/carddisp.pl?gene=ERVW-1">https://www.genecards.org/cgi-bin/carddisp.pl?gene=ERVW-1</a>     |
|        | INSL4                                                     | Insulin Like 4                                   | Protein Coding | 39          | GC09P005231 | 0.816619277                                                                                                                       | <a href="https://www.genecards.org/cgi-bin/carddisp.pl?gene=INSL4">https://www.genecards.org/cgi-bin/carddisp.pl?gene=INSL4</a>       |
|        | ZDHHC9                                                    | Zinc Finger DHHC-Type Palmitoyltransferase 9     | Protein Coding | 50          | GC0XM129803 | 0.810890675                                                                                                                       | <a href="https://www.genecards.org/cgi-bin/carddisp.pl?gene=ZDHHC9">https://www.genecards.org/cgi-bin/carddisp.pl?gene=ZDHHC9</a>     |
|        | ZDHHC11                                                   | Zinc Finger DHHC-Type Containing 11              | Protein Coding | 41          | GC05M000795 | 0.810890675                                                                                                                       | <a href="https://www.genecards.org/cgi-bin/carddisp.pl?gene=ZDHHC11">https://www.genecards.org/cgi-bin/carddisp.pl?gene=ZDHHC11</a>   |
| B      | ZDHHC11                                                   | Zinc Finger DHHC-Type Containing 11B             | Protein Coding | 32          | GC05M000710 | 0.810890675                                                                                                                       | <a href="https://www.genecards.org/cgi-bin/carddisp.pl?gene=ZDHHC11B">https://www.genecards.org/cgi-bin/carddisp.pl?gene=ZDHHC11B</a> |
|        | INTS2                                                     | Integrator Complex Subunit 2                     | Protein Coding | 40          | GC17M061865 | 0.804532051                                                                                                                       | <a href="https://www.genecards.org/cgi-bin/carddisp.pl?gene=INTS2">https://www.genecards.org/cgi-bin/carddisp.pl?gene=INTS2</a>       |
|        | DPYSL3                                                    | Dihydropyrimidinase Like 3                       | Protein Coding | 46          | GC05M147390 | 0.798763692                                                                                                                       | <a href="https://www.genecards.org/cgi-bin/carddisp.pl?gene=DPYSL3">https://www.genecards.org/cgi-bin/carddisp.pl?gene=DPYSL3</a>     |
|        | GZMA                                                      | Granzyme A                                       | Protein Coding | 50          | GC05P055102 | 0.793988824                                                                                                                       | <a href="https://www.genecards.org/cgi-bin/carddisp.pl?gene=GZMA">https://www.genecards.org/cgi-bin/carddisp.pl?gene=GZMA</a>         |
|        | RPH3A                                                     | Rabphilin 3A                                     | Protein Coding | 46          | GC12P112570 | 0.793988824                                                                                                                       | <a href="https://www.genecards.org/cgi-bin/carddisp.pl?gene=RPH3A">https://www.genecards.org/cgi-bin/carddisp.pl?gene=RPH3A</a>       |



|         |                                                                 |                |    |             |             |                                                                                                                                       |
|---------|-----------------------------------------------------------------|----------------|----|-------------|-------------|---------------------------------------------------------------------------------------------------------------------------------------|
| SEZ6L2  | Seizure Related 6 Homolog Like 2                                | Protein Coding | 46 | GC16M038421 | 0.793988824 | <a href="https://www.genecards.org/cgi-bin/carddisp.pl?gene=SEZ6L2">https://www.genecards.org/cgi-bin/carddisp.pl?gene=SEZ6L2</a>     |
| CNKSR1  | Connector Enhancer Of Kinase Suppressor Of Ras 1                | Protein Coding | 44 | GC01P026178 | 0.793988824 | <a href="https://www.genecards.org/cgi-bin/carddisp.pl?gene=CNKSR1">https://www.genecards.org/cgi-bin/carddisp.pl?gene=CNKSR1</a>     |
| FRS3    | Fibroblast Growth Factor Receptor Substrate 3                   | Protein Coding | 40 | GC06M071935 | 0.793988824 | <a href="https://www.genecards.org/cgi-bin/carddisp.pl?gene=FRS3">https://www.genecards.org/cgi-bin/carddisp.pl?gene=FRS3</a>         |
| PTPRCAP | Protein Tyrosine Phosphatase Receptor Type C Associated Protein | Protein Coding | 40 | GC11M099809 | 0.793988824 | <a href="https://www.genecards.org/cgi-bin/carddisp.pl?gene=PTPRCAP">https://www.genecards.org/cgi-bin/carddisp.pl?gene=PTPRCAP</a>   |
| OCM2    | Oncomodulin 2                                                   | Protein Coding | 33 | GC07M097984 | 0.793988824 | <a href="https://www.genecards.org/cgi-bin/carddisp.pl?gene=OCM2">https://www.genecards.org/cgi-bin/carddisp.pl?gene=OCM2</a>         |
| AAVS1   | Adeno-Associated Virus Integration Site 1                       | Genetic Locus  | 6  | GC19U990001 | 0.793988824 | <a href="https://www.genecards.org/cgi-bin/carddisp.pl?gene=AAVS1">https://www.genecards.org/cgi-bin/carddisp.pl?gene=AAVS1</a>       |
| NM      | Neutrophil Migration                                            | Genetic Locus  | 6  | GC07U990060 | 0.793988824 | <a href="https://www.genecards.org/cgi-bin/carddisp.pl?gene=NM">https://www.genecards.org/cgi-bin/carddisp.pl?gene=NM</a>             |
| ZFP36L2 | ZFP36 Ring Finger Protein Like 2                                | Protein Coding | 44 | GC02M043184 | 0.773427129 | <a href="https://www.genecards.org/cgi-bin/carddisp.pl?gene=ZFP36L2">https://www.genecards.org/cgi-bin/carddisp.pl?gene=ZFP36L2</a>   |
| SLC1A6  | Solute Carrier Family 1 Member 6                                | Protein Coding | 51 | GC19M014921 | 0.773018479 | <a href="https://www.genecards.org/cgi-bin/carddisp.pl?gene=SLC1A6">https://www.genecards.org/cgi-bin/carddisp.pl?gene=SLC1A6</a>     |
| LDC1P   | Leucine Decarboxylase 1, Pseudogene                             | Pseudogene     | 13 | GC01P031501 | 0.771194696 | <a href="https://www.genecards.org/cgi-bin/carddisp.pl?gene=LDC1P">https://www.genecards.org/cgi-bin/carddisp.pl?gene=LDC1P</a>       |
| PDCD1LG | Programmed Cell Death 1 Ligand 2                                | Protein Coding | 50 | GC09P005510 | 0.767283797 | <a href="https://www.genecards.org/cgi-bin/carddisp.pl?gene=PDCD1LG2">https://www.genecards.org/cgi-bin/carddisp.pl?gene=PDCD1LG2</a> |
| IL1RL1  | Interleukin 1 Receptor Like 1                                   | Protein Coding | 48 | GC02P102294 | 0.767182589 | <a href="https://www.genecards.org/cgi-bin/carddisp.pl?gene=IL1RL1">https://www.genecards.org/cgi-bin/carddisp.pl?gene=IL1RL1</a>     |
| C1R     | Complement C1r                                                  | Protein Coding | 53 | GC12M007993 | 0.765953422 | <a href="https://www.genecards.org/cgi-bin/carddisp.pl?gene=C1R">https://www.genecards.org/cgi-bin/carddisp.pl?gene=C1R</a>           |
| PGGT1B  | Protein Geranylgeranyltransferase Type I Subunit Beta           | Protein Coding | 42 | GC05M115200 | 0.741063714 | <a href="https://www.genecards.org/cgi-bin/carddisp.pl?gene=PGGT1B">https://www.genecards.org/cgi-bin/carddisp.pl?gene=PGGT1B</a>     |
| TAPBP   | TAP Binding Protein                                             | Protein Coding | 51 | GC06M033299 | 0.738563597 | <a href="https://www.genecards.org/cgi-bin/carddisp.pl?gene=TAPBP">https://www.genecards.org/cgi-bin/carddisp.pl?gene=TAPBP</a>       |

|         |                                                            |                |    |             |             |                                                                                                                                     |
|---------|------------------------------------------------------------|----------------|----|-------------|-------------|-------------------------------------------------------------------------------------------------------------------------------------|
| HEBP1   | Heme Binding Protein 1                                     | Protein Coding | 40 | GC12M012974 | 0.737105608 | <a href="https://www.genecards.org/cgi-bin/carddisp.pl?gene=HEBP1">https://www.genecards.org/cgi-bin/carddisp.pl?gene=HEBP1</a>     |
| GRIK5   | Glutamate Ionotropic Receptor Kainate Type Subunit 5       | Protein Coding | 52 | GC19M041998 | 0.736668408 | <a href="https://www.genecards.org/cgi-bin/carddisp.pl?gene=GRIK5">https://www.genecards.org/cgi-bin/carddisp.pl?gene=GRIK5</a>     |
| POLH    | DNA Polymerase Eta                                         | Protein Coding | 55 | GC06P043576 | 0.727330506 | <a href="https://www.genecards.org/cgi-bin/carddisp.pl?gene=POLH">https://www.genecards.org/cgi-bin/carddisp.pl?gene=POLH</a>       |
| GTF3C4  | General Transcription Factor IIIC Subunit 4                | Protein Coding | 44 | GC09P132671 | 0.727330506 | <a href="https://www.genecards.org/cgi-bin/carddisp.pl?gene=GTF3C4">https://www.genecards.org/cgi-bin/carddisp.pl?gene=GTF3C4</a>   |
| SHANK3  | SH3 And Multiple Ankyrin Repeat Domains 3                  | Protein Coding | 45 | GC22P050674 | 0.725786924 | <a href="https://www.genecards.org/cgi-bin/carddisp.pl?gene=SHANK3">https://www.genecards.org/cgi-bin/carddisp.pl?gene=SHANK3</a>   |
| H3-4    | H3.4 Histone, Cluster Member                               | Protein Coding | 44 | GC01M228427 | 0.722606659 | <a href="https://www.genecards.org/cgi-bin/carddisp.pl?gene=H3-4">https://www.genecards.org/cgi-bin/carddisp.pl?gene=H3-4</a>       |
| ZDHHC24 | Zinc Finger DHHC-Type Containing 24                        | Protein Coding | 40 | GC11M099766 | 0.714433014 | <a href="https://www.genecards.org/cgi-bin/carddisp.pl?gene=ZDHHC24">https://www.genecards.org/cgi-bin/carddisp.pl?gene=ZDHHC24</a> |
| PADI4   | Peptidyl Arginine Deiminase 4                              | Protein Coding | 51 | GC01P017308 | 0.704137444 | <a href="https://www.genecards.org/cgi-bin/carddisp.pl?gene=PADI4">https://www.genecards.org/cgi-bin/carddisp.pl?gene=PADI4</a>     |
| NAA20   | N-Alpha-Acetyltransferase 20, NatB Catalytic Subunit       | Protein Coding | 47 | GC20P020018 | 0.699793696 | <a href="https://www.genecards.org/cgi-bin/carddisp.pl?gene=NAA20">https://www.genecards.org/cgi-bin/carddisp.pl?gene=NAA20</a>     |
| ZDHHC8  | Zinc Finger DHHC-Type Palmitoyltransferase 8               | Protein Coding | 46 | GC22P020129 | 0.699793696 | <a href="https://www.genecards.org/cgi-bin/carddisp.pl?gene=ZDHHC8">https://www.genecards.org/cgi-bin/carddisp.pl?gene=ZDHHC8</a>   |
| MPDZ    | Multiple PDZ Domain Crumbs Cell Polarity Complex Component | Protein Coding | 50 | GC09M013105 | 0.69947648  | <a href="https://www.genecards.org/cgi-bin/carddisp.pl?gene=MPDZ">https://www.genecards.org/cgi-bin/carddisp.pl?gene=MPDZ</a>       |
| PTMA    | Prothymosin Alpha                                          | Protein Coding | 48 | GC02P231838 | 0.692750692 | <a href="https://www.genecards.org/cgi-bin/carddisp.pl?gene=PTMA">https://www.genecards.org/cgi-bin/carddisp.pl?gene=PTMA</a>       |
| ZDHHC6  | Zinc Finger DHHC-Type Palmitoyltransferase 6               | Protein Coding | 43 | GC10M112430 | 0.682428718 | <a href="https://www.genecards.org/cgi-bin/carddisp.pl?gene=ZDHHC6">https://www.genecards.org/cgi-bin/carddisp.pl?gene=ZDHHC6</a>   |
| JUND    | JunD Proto-Oncogene, AP-1 Transcription Factor Subunit     | Protein Coding | 48 | GC19M018279 | 0.682285666 | <a href="https://www.genecards.org/cgi-bin/carddisp.pl?gene=JUND">https://www.genecards.org/cgi-bin/carddisp.pl?gene=JUND</a>       |
| GRIK3   | Glutamate Ionotropic Receptor Kainate Type Subunit 3       | Protein Coding | 51 | GC01M036795 | 0.680615485 | <a href="https://www.genecards.org/cgi-bin/carddisp.pl?gene=GRIK3">https://www.genecards.org/cgi-bin/carddisp.pl?gene=GRIK3</a>     |

|         |                                               |                |    |             |             |                                                                                                                                     |
|---------|-----------------------------------------------|----------------|----|-------------|-------------|-------------------------------------------------------------------------------------------------------------------------------------|
| HSPE1   | Heat Shock Protein Family E (Hsp10) Member 1  | Protein Coding | 49 | GC02P197501 | 0.67894119  | <a href="https://www.genecards.org/cgi-bin/carddisp.pl?gene=HSPE1">https://www.genecards.org/cgi-bin/carddisp.pl?gene=HSPE1</a>     |
| PDS5B   | PDS5 Cohesin Associated Factor B              | Protein Coding | 44 | GC13P032586 | 0.66158253  | <a href="https://www.genecards.org/cgi-bin/carddisp.pl?gene=PDS5B">https://www.genecards.org/cgi-bin/carddisp.pl?gene=PDS5B</a>     |
| ZDHHC14 | Zinc Finger DHHC-Type Palmitoyltransferase 14 | Protein Coding | 43 | GC06P157381 | 0.659798265 | <a href="https://www.genecards.org/cgi-bin/carddisp.pl?gene=ZDHHC14">https://www.genecards.org/cgi-bin/carddisp.pl?gene=ZDHHC14</a> |
| ZDHHC12 | Zinc Finger DHHC-Type Palmitoyltransferase 12 | Protein Coding | 36 | GC09M128720 | 0.659798265 | <a href="https://www.genecards.org/cgi-bin/carddisp.pl?gene=ZDHHC12">https://www.genecards.org/cgi-bin/carddisp.pl?gene=ZDHHC12</a> |
| RLN2    | Relaxin 2                                     | Protein Coding | 42 | GC09M005438 | 0.655414581 | <a href="https://www.genecards.org/cgi-bin/carddisp.pl?gene=RLN2">https://www.genecards.org/cgi-bin/carddisp.pl?gene=RLN2</a>       |
| OMP     | Olfactory Marker Protein                      | Protein Coding | 42 | GC11P077102 | 0.645645916 | <a href="https://www.genecards.org/cgi-bin/carddisp.pl?gene=OMP">https://www.genecards.org/cgi-bin/carddisp.pl?gene=OMP</a>         |
| NPTX2   | Neuronal Pentraxin 2                          | Protein Coding | 49 | GC07P098620 | 0.642618299 | <a href="https://www.genecards.org/cgi-bin/carddisp.pl?gene=NPTX2">https://www.genecards.org/cgi-bin/carddisp.pl?gene=NPTX2</a>     |
| PPP1R9B | Protein Phosphatase 1 Regulatory Subunit 9B   | Protein Coding | 47 | GC17M050133 | 0.628742099 | <a href="https://www.genecards.org/cgi-bin/carddisp.pl?gene=PPP1R9B">https://www.genecards.org/cgi-bin/carddisp.pl?gene=PPP1R9B</a> |
| TNXA    | Tenascin XA (Pseudogene)                      | Pseudogene     | 27 | GC06M071744 | 0.625919342 | <a href="https://www.genecards.org/cgi-bin/carddisp.pl?gene=TNXA">https://www.genecards.org/cgi-bin/carddisp.pl?gene=TNXA</a>       |
| MYO7A   | Myosin VIIA                                   | Protein Coding | 50 | GC11P077128 | 0.625438094 | <a href="https://www.genecards.org/cgi-bin/carddisp.pl?gene=MYO7A">https://www.genecards.org/cgi-bin/carddisp.pl?gene=MYO7A</a>     |
| ACKR2   | Atypical Chemokine Receptor 2                 | Protein Coding | 47 | GC03P042804 | 0.619987786 | <a href="https://www.genecards.org/cgi-bin/carddisp.pl?gene=ACKR2">https://www.genecards.org/cgi-bin/carddisp.pl?gene=ACKR2</a>     |
| SLC4A10 | Solute Carrier Family 4 Member 10             | Protein Coding | 47 | GC02P161425 | 0.609507203 | <a href="https://www.genecards.org/cgi-bin/carddisp.pl?gene=SLC4A10">https://www.genecards.org/cgi-bin/carddisp.pl?gene=SLC4A10</a> |
| ZDHHC15 | Zinc Finger DHHC-Type Palmitoyltransferase 15 | Protein Coding | 44 | GC0XM075368 | 0.605163455 | <a href="https://www.genecards.org/cgi-bin/carddisp.pl?gene=ZDHHC15">https://www.genecards.org/cgi-bin/carddisp.pl?gene=ZDHHC15</a> |
| ZDHHC19 | Zinc Finger DHHC-Type Palmitoyltransferase 19 | Protein Coding | 43 | GC03M196197 | 0.605163455 | <a href="https://www.genecards.org/cgi-bin/carddisp.pl?gene=ZDHHC19">https://www.genecards.org/cgi-bin/carddisp.pl?gene=ZDHHC19</a> |
| ZDHHC16 | Zinc Finger DHHC-Type Palmitoyltransferase 16 | Protein Coding | 40 | GC10P097446 | 0.605163455 | <a href="https://www.genecards.org/cgi-bin/carddisp.pl?gene=ZDHHC16">https://www.genecards.org/cgi-bin/carddisp.pl?gene=ZDHHC16</a> |

|         |                                                                  |                |    |             |             |                                                                                                                                     |
|---------|------------------------------------------------------------------|----------------|----|-------------|-------------|-------------------------------------------------------------------------------------------------------------------------------------|
| ZDHHC23 | Zinc Finger DHHC-Type Palmitoyltransferase 23                    | Protein Coding | 40 | GC03P113947 | 0.605163455 | <a href="https://www.genecards.org/cgi-bin/carddisp.pl?gene=ZDHHC23">https://www.genecards.org/cgi-bin/carddisp.pl?gene=ZDHHC23</a> |
| NAA11   | N-Alpha-Acetyltransferase 11, NatA Catalytic Subunit             | Protein Coding | 38 | GC04M079155 | 0.605163455 | <a href="https://www.genecards.org/cgi-bin/carddisp.pl?gene=NAA11">https://www.genecards.org/cgi-bin/carddisp.pl?gene=NAA11</a>     |
| ZDHHC22 | Zinc Finger DHHC-Type Palmitoyltransferase 22                    | Protein Coding | 35 | GC14M077159 | 0.605163455 | <a href="https://www.genecards.org/cgi-bin/carddisp.pl?gene=ZDHHC22">https://www.genecards.org/cgi-bin/carddisp.pl?gene=ZDHHC22</a> |
| GRIK4   | Glutamate Ionotropic Receptor Kainate Type Subunit 4             | Protein Coding | 52 | GC11P120512 | 0.604043722 | <a href="https://www.genecards.org/cgi-bin/carddisp.pl?gene=GRIK4">https://www.genecards.org/cgi-bin/carddisp.pl?gene=GRIK4</a>     |
| GJB6    | Gap Junction Protein Beta 6                                      | Protein Coding | 49 | GC13M020221 | 0.599481165 | <a href="https://www.genecards.org/cgi-bin/carddisp.pl?gene=GJB6">https://www.genecards.org/cgi-bin/carddisp.pl?gene=GJB6</a>       |
| AGAP2   | ArfGAP With GTPase Domain, Ankyrin Repeat And PH Domain 2        | Protein Coding | 47 | GC12M057723 | 0.596378684 | <a href="https://www.genecards.org/cgi-bin/carddisp.pl?gene=AGAP2">https://www.genecards.org/cgi-bin/carddisp.pl?gene=AGAP2</a>     |
| CACNG3  | Calcium Voltage-Gated Channel Auxiliary Subunit Gamma 3          | Protein Coding | 48 | GC16P024615 | 0.595825553 | <a href="https://www.genecards.org/cgi-bin/carddisp.pl?gene=CACNG3">https://www.genecards.org/cgi-bin/carddisp.pl?gene=CACNG3</a>   |
| DCAF4   | DDB1 And CUL4 Associated Factor 4                                | Protein Coding | 38 | GC14P072926 | 0.595719576 | <a href="https://www.genecards.org/cgi-bin/carddisp.pl?gene=DCAF4">https://www.genecards.org/cgi-bin/carddisp.pl?gene=DCAF4</a>     |
| TACR2   | Tachykinin Receptor 2                                            | Protein Coding | 50 | GC10M069403 | 0.584081471 | <a href="https://www.genecards.org/cgi-bin/carddisp.pl?gene=TACR2">https://www.genecards.org/cgi-bin/carddisp.pl?gene=TACR2</a>     |
| TRAK1   | Trafficking Kinesin Protein 1                                    | Protein Coding | 48 | GC03P042020 | 0.580011547 | <a href="https://www.genecards.org/cgi-bin/carddisp.pl?gene=TRAK1">https://www.genecards.org/cgi-bin/carddisp.pl?gene=TRAK1</a>     |
| CCR10   | C-C Motif Chemokine Receptor 10                                  | Protein Coding | 42 | GC17M042678 | 0.534312725 | <a href="https://www.genecards.org/cgi-bin/carddisp.pl?gene=CCR10">https://www.genecards.org/cgi-bin/carddisp.pl?gene=CCR10</a>     |
| TMC2    | Transmembrane Channel Like 2                                     | Protein Coding | 42 | GC20P002536 | 0.529317021 | <a href="https://www.genecards.org/cgi-bin/carddisp.pl?gene=TMC2">https://www.genecards.org/cgi-bin/carddisp.pl?gene=TMC2</a>       |
| TRPM1   | Transient Receptor Potential Cation Channel Subfamily M Member 1 | Protein Coding | 51 | GC15M031001 | 0.490211636 | <a href="https://www.genecards.org/cgi-bin/carddisp.pl?gene=TRPM1">https://www.genecards.org/cgi-bin/carddisp.pl?gene=TRPM1</a>     |
| RSL24D1 | Ribosomal L24 Domain Containing 1                                | Protein Coding | 43 | GC15M055180 | 0.482226133 | <a href="https://www.genecards.org/cgi-bin/carddisp.pl?gene=RSL24D1">https://www.genecards.org/cgi-bin/carddisp.pl?gene=RSL24D1</a> |
| TMEM37  | Transmembrane Protein 37                                         | Protein Coding | 38 | GC02P119429 | 0.465801805 | <a href="https://www.genecards.org/cgi-bin/carddisp.pl?gene=TMEM37">https://www.genecards.org/cgi-bin/carddisp.pl?gene=TMEM37</a>   |

|        |                                                                      |                |    |             |             |                                                                                                                                   |
|--------|----------------------------------------------------------------------|----------------|----|-------------|-------------|-----------------------------------------------------------------------------------------------------------------------------------|
| DEFA1  | Defensin Alpha 1                                                     | Protein Coding | 44 | GC08M006977 | 0.45585534  | <a href="https://www.genecards.org/cgi-bin/carddisp.pl?gene=DEFA1">https://www.genecards.org/cgi-bin/carddisp.pl?gene=DEFA1</a>   |
| KEL    | Kell Metallo-Endopeptidase (Kell Blood Group)                        | Protein Coding | 48 | GC07M143027 | 0.439531475 | <a href="https://www.genecards.org/cgi-bin/carddisp.pl?gene=KEL">https://www.genecards.org/cgi-bin/carddisp.pl?gene=KEL</a>       |
| GRINA  | Glutamate Ionotropic Receptor NMDA Type Subunit Associated Protein 1 | Protein Coding | 40 | GC08P143990 | 0.43129757  | <a href="https://www.genecards.org/cgi-bin/carddisp.pl?gene=GRINA">https://www.genecards.org/cgi-bin/carddisp.pl?gene=GRINA</a>   |
| C4BPA  | Complement Component 4 Binding Protein Alpha                         | Protein Coding | 49 | GC01P207105 | 0.429623127 | <a href="https://www.genecards.org/cgi-bin/carddisp.pl?gene=C4BPA">https://www.genecards.org/cgi-bin/carddisp.pl?gene=C4BPA</a>   |
| RCOR1  | REST Corepressor 1                                                   | Protein Coding | 49 | GC14P102592 | 0.429034412 | <a href="https://www.genecards.org/cgi-bin/carddisp.pl?gene=RCOR1">https://www.genecards.org/cgi-bin/carddisp.pl?gene=RCOR1</a>   |
| TMC1   | Transmembrane Channel Like 1                                         | Protein Coding | 46 | GC09P072521 | 0.390098333 | <a href="https://www.genecards.org/cgi-bin/carddisp.pl?gene=TMC1">https://www.genecards.org/cgi-bin/carddisp.pl?gene=TMC1</a>     |
| CRYBA1 | Crystallin Beta A1                                                   | Protein Coding | 46 | GC17P029246 | 0.389627695 | <a href="https://www.genecards.org/cgi-bin/carddisp.pl?gene=CRYBA1">https://www.genecards.org/cgi-bin/carddisp.pl?gene=CRYBA1</a> |
| TAAR6  | Trace Amine Associated Receptor 6                                    | Protein Coding | 40 | GC06P132570 | 0.389627695 | <a href="https://www.genecards.org/cgi-bin/carddisp.pl?gene=TAAR6">https://www.genecards.org/cgi-bin/carddisp.pl?gene=TAAR6</a>   |
| ZNF521 | Zinc Finger Protein 521                                              | Protein Coding | 43 | GC18M025061 | 0.345749646 | <a href="https://www.genecards.org/cgi-bin/carddisp.pl?gene=ZNF521">https://www.genecards.org/cgi-bin/carddisp.pl?gene=ZNF521</a> |
| CACNG1 | Calcium Voltage-Gated Channel Auxiliary Subunit Gamma 1              | Protein Coding | 48 | GC17P067044 | 0.342445672 | <a href="https://www.genecards.org/cgi-bin/carddisp.pl?gene=CACNG1">https://www.genecards.org/cgi-bin/carddisp.pl?gene=CACNG1</a> |
| P2RY4  | Pyrimidinergic Receptor P2Y4                                         | Protein Coding | 46 | GC0XM070258 | 0.340865254 | <a href="https://www.genecards.org/cgi-bin/carddisp.pl?gene=P2RY4">https://www.genecards.org/cgi-bin/carddisp.pl?gene=P2RY4</a>   |
| USH1C  | USH1 Protein Network Component Harmonin                              | Protein Coding | 50 | GC11M017665 | 0.334992945 | <a href="https://www.genecards.org/cgi-bin/carddisp.pl?gene=USH1C">https://www.genecards.org/cgi-bin/carddisp.pl?gene=USH1C</a>   |
| P2RY6  | Pyrimidinergic Receptor P2Y6                                         | Protein Coding | 48 | GC11P073264 | 0.310468733 | <a href="https://www.genecards.org/cgi-bin/carddisp.pl?gene=P2RY6">https://www.genecards.org/cgi-bin/carddisp.pl?gene=P2RY6</a>   |
| TRAK2  | Trafficking Kinesin Protein 2                                        | Protein Coding | 47 | GC02M201377 | 0.304976404 | <a href="https://www.genecards.org/cgi-bin/carddisp.pl?gene=TRAK2">https://www.genecards.org/cgi-bin/carddisp.pl?gene=TRAK2</a>   |
| MRGPRD | MAS Related GPR Family Member D                                      | Protein Coding | 43 | GC11M068980 | 0.288439035 | <a href="https://www.genecards.org/cgi-bin/carddisp.pl?gene=MRGPRD">https://www.genecards.org/cgi-bin/carddisp.pl?gene=MRGPRD</a> |

|         |                                                         |                    |    |             |             |                                                                                                                                     |
|---------|---------------------------------------------------------|--------------------|----|-------------|-------------|-------------------------------------------------------------------------------------------------------------------------------------|
| HBB-LCR | Beta-Globin Locus Control Region                        | Functional Element | 7  | GC11P005434 | 0.260074615 | <a href="https://www.genecards.org/cgi-bin/carddisp.pl?gene=HBB-LCR">https://www.genecards.org/cgi-bin/carddisp.pl?gene=HBB-LCR</a> |
| GRIPAP1 | GRIP1 Associated Protein 1                              | Protein Coding     | 41 | GC0XM048973 | 0.23853527  | <a href="https://www.genecards.org/cgi-bin/carddisp.pl?gene=GRIPAP1">https://www.genecards.org/cgi-bin/carddisp.pl?gene=GRIPAP1</a> |
| CACNG8  | Calcium Voltage-Gated Channel Auxiliary Subunit Gamma 8 | Protein Coding     | 43 | GC19P073470 | 0.237444133 | <a href="https://www.genecards.org/cgi-bin/carddisp.pl?gene=CACNG8">https://www.genecards.org/cgi-bin/carddisp.pl?gene=CACNG8</a>   |
| CACNG4  | Calcium Voltage-Gated Channel Auxiliary Subunit Gamma 4 | Protein Coding     | 48 | GC17P066964 | 0.223895937 | <a href="https://www.genecards.org/cgi-bin/carddisp.pl?gene=CACNG4">https://www.genecards.org/cgi-bin/carddisp.pl?gene=CACNG4</a>   |
| OR51E1  | Olfactory Receptor Family 51 Subfamily E Member 1       | Protein Coding     | 40 | GC11P004643 | 0.206530973 | <a href="https://www.genecards.org/cgi-bin/carddisp.pl?gene=OR51E1">https://www.genecards.org/cgi-bin/carddisp.pl?gene=OR51E1</a>   |
| PCDHGC3 | Protocadherin Gamma Subfamily C, 3                      | Protein Coding     | 45 | GC05P141475 | 0.183900505 | <a href="https://www.genecards.org/cgi-bin/carddisp.pl?gene=PCDHGC3">https://www.genecards.org/cgi-bin/carddisp.pl?gene=PCDHGC3</a> |
| CST2    | Cystatin SA                                             | Protein Coding     | 39 | GC20M023805 | 0.183900505 | <a href="https://www.genecards.org/cgi-bin/carddisp.pl?gene=CST2">https://www.genecards.org/cgi-bin/carddisp.pl?gene=CST2</a>       |

**Supplementary Table 2 Patient informations in the verification study part**

| <b>Pathology number</b> | <b>Gender</b> | <b>Age</b> | <b>Hospital number</b> | <b>Pathological diagnosis</b>                                                                                                                                                                                                                                                                                                                                                                                                                        |
|-------------------------|---------------|------------|------------------------|------------------------------------------------------------------------------------------------------------------------------------------------------------------------------------------------------------------------------------------------------------------------------------------------------------------------------------------------------------------------------------------------------------------------------------------------------|
| <b>100175</b>           | M             | 44         | 15110190               | (Hepatic) Hepatocellular Carcinoma.<br>Immunomarkers: Hepa+, Glypican+, AFP+, CD34 sinusoidal vessels+, CK19-, Ki67+ 10%.                                                                                                                                                                                                                                                                                                                            |
| <b>100183</b>           | M             | 69         | 15104457               | (Left Liver) Clusters of epithelioid cells are observed in the coagulation tissue, with abundant sinusoids in between.<br>Immunomarkers: Glypican weakly positive, CD34 sinusoidal vessels positive, Hepa negative, CK negative, Vimentin negative, CK19 negative, AFP negative, Ki67 positive 5%.<br>Considering the combined immunomarker results, the diagnosis is suggestive of hepatocellular carcinoma with extensive intrastromal hemorrhage. |
| <b>100310</b>           | M             | 45         | 15110944               | (Hepatic) Hepatocellular Carcinoma.<br>Immunomarkers: AFP positive, Glypican-3 positive, Hepa negative, CK19 negative, CD34 vessels positive, Ki-67 positive 20%.                                                                                                                                                                                                                                                                                    |
| <b>100953</b>           | M             | 58         | 15114170               | (Hepatic) Hepatocellular Carcinoma.<br>Immunomarkers: Hepa positive, AFP positive, Glypican-3 positive, CD34 sinusoidal vessels positive, CK19 negative, Ki-67 positive 40%.                                                                                                                                                                                                                                                                         |
| <b>101268</b>           | F             | 67         | 15121477               | Well-differentiated Hepatocellular Carcinoma with necrosis identified within the liver.<br>The tumor measures 12x9x7cm in size. The carcinoma displays infiltrative growth pattern, involving the surrounding hepatic tissue, but without breaching the capsule. Intravascular tumor emboli are evident, while the margins show no evidence of malignancy.                                                                                           |
| <b>101277</b>           | M             | 64         | 15121550               | (Hepatic) Hepatocellular Carcinoma.                                                                                                                                                                                                                                                                                                                                                                                                                  |

|               |   |    |          |                                                                                                                                                                                                                                                                                                                                                                                                                                                                                                                                                                                     |
|---------------|---|----|----------|-------------------------------------------------------------------------------------------------------------------------------------------------------------------------------------------------------------------------------------------------------------------------------------------------------------------------------------------------------------------------------------------------------------------------------------------------------------------------------------------------------------------------------------------------------------------------------------|
|               |   |    |          | Immunomarkers: HEP positive, Galectin-3 positive, AFP positive, CD34 vessels positive, CK19 negative, Ki67 positive 40%.                                                                                                                                                                                                                                                                                                                                                                                                                                                            |
| <b>101807</b> | M | 70 | 15124649 | <p>(Left Lobe) Adjacent to the capsule, well-differentiated hepatocellular carcinoma with localized necrosis is observed, measuring 13x5x4cm. The carcinoma displays infiltrative growth, penetrating the capsule and extending into the surrounding adipose fibrous tissue. Peripheral portions of the liver show sinusoidal dilation and congestion, resembling nodular cirrhotic changes.</p> <p>Immunohistochemistry: Hepatocyte positive, CD34 sinusoids positive, Glypican-3 positive, CK19 negative, AFP negative, Ki-67 positive with focal areas showing 30% staining.</p> |
| <b>102058</b> | F | 52 | 16010728 | <p>1. Gallbladder Specimen:<br/>Chronic cholecystitis with partial glandular invagination.</p> <p>2. Partial Liver Specimen:<br/>Moderately differentiated hepatocellular carcinoma, measuring 1.8x1.7x0.5cm.</p> <p>Immunomarkers: HepPar-1 positive, Glypican-3 positive, AFP negative, CD34 sinusoidal vessels positive, CK19 negative, Ki67 positive 30%.</p>                                                                                                                                                                                                                   |
| <b>102222</b> | M | 69 | 16011086 | <p>(Right Lobe of Liver) Moderately differentiated hepatocellular carcinoma, measuring 4.0x3.5x3.2cm. The carcinoma exhibits infiltrative growth, invading the liver capsule and focal penetration of the capsule. There is no evidence of malignancy at the liver margins. The surrounding liver tissue shows nodular cirrhotic changes.</p> <p>Immunomarkers: Hepatocyte positive, Glypican-3 positive, CD34 sinusoidal vessels positive, CK19 negative, Ki-67 positive 10%.</p>                                                                                                  |



|               |   |    |          |                                                                                                                                                                                                                                                                                                    |
|---------------|---|----|----------|----------------------------------------------------------------------------------------------------------------------------------------------------------------------------------------------------------------------------------------------------------------------------------------------------|
| <b>103702</b> | F | 65 | 16030849 | (Hepatic) Infiltration of carcinoma is observed within the liver tissue. Considering the immunomarker results: Focal Hep positive, AFP positive, Glypican-3 positive, CK19 positive, focal CK7 positive, CD34 stromal vessels positive, Ki67 positive 50%.<br>Diagnosis: Hepatocellular Carcinoma. |
|---------------|---|----|----------|----------------------------------------------------------------------------------------------------------------------------------------------------------------------------------------------------------------------------------------------------------------------------------------------------|

**Supplement Tab 3 132 propionate metabolism-related genes**

PCCA

CYP3A4

CYP2C19

MMAA

ACADM

OTC

CYP2C9

LDLR

ALB

CYP2C8

CYP1A2

IL6

LIPC

LPL

APOB

UGT1A1

CYP1A1

GCDH

CYP2B6

IGF1

CYP2A6

CBS

HMGCL

CYP2E1

PAH

CPT2

ETFDH

ACADS

PC

CRP

GGT1

APOA1

BCKDHB

CES1

UGT1A6

ASS1

IVD

HIBCH

CETP

CPS1

GPT

GLDC

IL1B

HSD11B1

ENPP1

CYP27B1

XDH

CA5A

MAT1A

LEPR

ABCA1

UGT1A9

FGF23

CYP17A1

APOC3

DPYD

ADRB2

ALDH2

NR3C2

SLCO1B1

IL10

CASR

SHBG

CYP19A1

HPD

VKORC1

FBP1

ALDH5A1

FTCD

ESR1

PTGS2

PON1

FAH

CP

COMT

G6PD

DDC

APOA5

UGT1A3

MLYCD

UGT1A10

NAT2

PLA2G4A

NR1H2

QDPR

ALDH6A1

F2

HBB

CCL2

SERPINE1

ALDOB

PNP

ALPL

GATM

BCHE

MPO

ARG1

SLC4A1

FABP4

CAT

NQO1

SULT1A1

TF

CYP3A7  
ACAT1  
CTH  
AR  
GCSH  
TAT  
EHHADH  
CFTR  
UPB1  
PTGS1  
RBP4  
HMOX1  
ABCG2  
UGT2B7  
CYP27A1  
SLC25A20  
UGT1A4  
KYNU  
SRD5A2  
PCK2  
HMGCS2  
FFAR2  
EPHX2  
GOT2  
KCNJ11  
NR1H3

IGFBP3

SERPINA1

TTR

**Supplementary Table 4 The KEGG pathways enriched in the high-risk group**

| D                                                 | Description                                       | setSize |
|---------------------------------------------------|---------------------------------------------------|---------|
| KEGG_COMPLEMENT_AND_COAGULATION_CASCADES          | KEGG_COMPLEMENT_AND_COAGULATION_CASCADES          | 68      |
| KEGG_RETINOL_METABOLISM                           | KEGG_RETINOL_METABOLISM                           | 62      |
| KEGG_DRUG_METABOLISM_CYTOCHROME_P450              | KEGG_DRUG_METABOLISM_CYTOCHROME_P450              | 71      |
| KEGG_FATTY_ACID_METABOLISM                        | KEGG_FATTY_ACID_METABOLISM                        | 40      |
| KEGG_PEROXISOME                                   | KEGG_PEROXISOME                                   | 77      |
| KEGG_METABOLISM_OF_XENOBIOTICS_BY_CYTOCHROME_P450 | KEGG_METABOLISM_OF_XENOBIOTICS_BY_CYTOCHROME_P450 | 69      |
| KEGG_GLYCINE_SERINE_AND_THREONINE_METABOLISM      | KEGG_GLYCINE_SERINE_AND_THREONINE_METABOLISM      | 31      |
| KEGG_TRYPTOPHAN_METABOLISM                        | KEGG_TRYPTOPHAN_METABOLISM                        | 38      |
| KEGG_PPAR_SIGNALING_PATHWAY                       | KEGG_PPAR_SIGNALING_PATHWAY                       | 69      |
| KEGG_VALINE_LEUCINE_AND_ISOLEUCINE_DEGRADATION    | KEGG_VALINE_LEUCINE_AND_ISOLEUCINE_DEGRADATION    | 43      |
| KEGG_STEROID_HORMONE_BIOSYNTHESIS                 | KEGG_STEROID_HORMONE_BIOSYNTHESIS                 | 54      |
| KEGG_PROPANOATE_METABOLISM                        | KEGG_PROPANOATE_METABOLISM                        | 31      |
| KEGG_DRUG_METABOLISM_OTHER_ENZYMES                | KEGG_DRUG_METABOLISM_OTHER_ENZYMES                | 49      |
| KEGG_PRIMARY_BILE_ACID_BIOSYNTHESIS               | KEGG_PRIMARY_BILE_ACID_BIOSYNTHESIS               | 16      |
| KEGG_TYROSINE_METABOLISM                          | KEGG_TYROSINE_METABOLISM                          | 40      |
| KEGG_HISTIDINE_METABOLISM                         | KEGG_HISTIDINE_METABOLISM                         | 27      |
| KEGG_ARGININE_AND_PROLINE_METABOLISM              | KEGG_ARGININE_AND_PROLINE_METABOLISM              | 51      |
| KEGG_LYSINE_DEGRADATION                           | KEGG_LYSINE_DEGRADATION                           | 39      |
| KEGG_LINOLEIC_ACID_METABOLISM                     | KEGG_LINOLEIC_ACID_METABOLISM                     | 27      |
| KEGG_BETA_ALANINE_METABOLISM                      | KEGG_BETA_ALANINE_METABOLISM                      | 22      |
| KEGG_CITRATE_CYCLE_TCA_CYCLE                      | KEGG_CITRATE_CYCLE_TCA_CYCLE                      | 30      |
| KEGG_GLYCOLYSIS_GLUconeogenesis                   | KEGG_GLYCOLYSIS_GLUconeogenesis                   | 61      |
| KEGG_CYSTEINE_AND_METHIONINE_METABOLISM           | KEGG_CYSTEINE_AND_METHIONINE_METABOLISM           | 34      |
| KEGG_BUTANOATE_METABOLISM                         | KEGG_BUTANOATE_METABOLISM                         | 34      |
| KEGG_RENIN_ANGIOTENSIN_SYSTEM                     | KEGG_RENIN_ANGIOTENSIN_SYSTEM                     | 17      |
| KEGG_PYRUVATE_METABOLISM                          | KEGG_PYRUVATE_METABOLISM                          | 39      |
| KEGG_ALANINE_ASPARTATE_AND_GLUTAMATE_METABOLISM   | KEGG_ALANINE_ASPARTATE_AND_GLUTAMATE_METABOLISM   | 30      |
| KEGG_STARCH_AND_SUCROSE_METABOLISM                | KEGG_STARCH_AND_SUCROSE_METABOLISM                | 49      |
| KEGG_ADIPOCYTOKINE_SIGNALING_PATHWAY              | KEGG_ADIPOCYTOKINE_SIGNALING_PATHWAY              | 67      |



|                                               |                                               |     |
|-----------------------------------------------|-----------------------------------------------|-----|
| KEGG_ARACHIDONIC_ACID_METABOLISM              | KEGG_ARACHIDONIC_ACID_METABOLISM              | 56  |
| KEGG_ASCORBATE_AND_ALDARATE_METABOLISM        | KEGG_ASCORBATE_AND_ALDARATE_METABOLISM        | 24  |
| KEGG_PORPHYRIN_AND_CHLOROPHYLL_METABOLISM     | KEGG_PORPHYRIN_AND_CHLOROPHYLL_METABOLISM     | 39  |
| KEGG_BIOSYNTHESIS_OF_UNSATURATED_FATTY_ACIDS  | KEGG_BIOSYNTHESIS_OF_UNSATURATED_FATTY_ACIDS  | 20  |
| KEGG_GLYOXYLATE_AND_DICARBOXYLATE_METABOLISM  | KEGG_GLYOXYLATE_AND_DICARBOXYLATE_METABOLISM  | 16  |
| KEGG_PENTOSE_AND_GLUCURONATE_INTERCONVERSIONS | KEGG_PENTOSE_AND_GLUCURONATE_INTERCONVERSIONS | 26  |
| KEGG_ABC_TRANSPORTERS                         | KEGG_ABC_TRANSPORTERS                         | 44  |
| KEGG_INSULIN_SIGNALING_PATHWAY                | KEGG_INSULIN_SIGNALING_PATHWAY                | 137 |
| KEGG_CYTOKINE_CYTOKINE_RECEPTOR_INTERACTION   | KEGG_CYTOKINE_CYTOKINE_RECEPTOR_INTERACTION   | 258 |
| KEGG_RIBOSOME                                 | KEGG_RIBOSOME                                 | 87  |
| KEGG_SPLICEOSOME                              | KEGG_SPLICEOSOME                              | 110 |
| KEGG_BLADDER_CANCER                           | KEGG_BLADDER_CANCER                           | 40  |
| KEGG_HEMATOPOIETIC_CELL_LINEAGE               | KEGG_HEMATOPOIETIC_CELL_LINEAGE               | 81  |
| KEGG_NOD_LIKE_RECEPTOR_SIGNALING_PATHWAY      | KEGG_NOD_LIKE_RECEPTOR_SIGNALING_PATHWAY      | 60  |
| KEGG_T_CELL_RECEPTOR_SIGNALING_PATHWAY        | KEGG_T_CELL_RECEPTOR_SIGNALING_PATHWAY        | 106 |
| KEGG_LEISHMANIA_INFECTION                     | KEGG_LEISHMANIA_INFECTION                     | 58  |
| KEGG_FC_GAMMA_R_MEDIATED_PHAGOCYTOSIS         | KEGG_FC_GAMMA_R_MEDIATED_PHAGOCYTOSIS         | 92  |
| KEGG_DNA_REPLICATION                          | KEGG_DNA_REPLICATION                          | 36  |
| KEGG_HOMOLOGOUS_RECOMBINATION                 | KEGG_HOMOLOGOUS_RECOMBINATION                 | 24  |
| KEGG_PRIMARY_IMMUNODEFICIENCY                 | KEGG_PRIMARY_IMMUNODEFICIENCY                 | 35  |
| KEGG_CELL_CYCLE                               | KEGG_CELL_CYCLE                               | 118 |

| enrichmentScore | NES         | pvalue   | p.adjust  | qvalue   | rank | leading_edge                   |
|-----------------|-------------|----------|-----------|----------|------|--------------------------------|
| 0.788294802     | 2.905109152 | 1.00E-10 | 3.07E-09  | 2.07E-09 | 1211 | tags=65%, list=6%, signal=61%  |
| 0.790863606     | 2.881537498 | 1.00E-10 | 3.07E-09  | 2.07E-09 | 1399 | tags=63%, list=7%, signal=59%  |
| 0.769050646     | 2.861852322 | 1.00E-10 | 3.07E-09  | 2.07E-09 | 1873 | tags=69%, list=9%, signal=63%  |
| 0.827121517     | 2.711756282 | 1.00E-10 | 3.07E-09  | 2.07E-09 | 2063 | tags=80%, list=10%, signal=72% |
| 0.714519557     | 2.682391932 | 1.00E-10 | 3.07E-09  | 2.07E-09 | 2899 | tags=60%, list=14%, signal=51% |
| 0.720961101     | 2.664541795 | 1.00E-10 | 3.07E-09  | 2.07E-09 | 1676 | tags=58%, list=8%, signal=53%  |
| 0.826903637     | 2.604613273 | 1.82E-09 | 3.35E-08  | 2.26E-08 | 1873 | tags=68%, list=9%, signal=62%  |
| 0.783167053     | 2.547139856 | 1.19E-09 | 2.61E-08  | 1.77E-08 | 1964 | tags=66%, list=10%, signal=60% |
| 0.686401358     | 2.536815238 | 2.07E-10 | 5.44E-09  | 3.67E-09 | 1434 | tags=46%, list=7%, signal=43%  |
| 0.753409377     | 2.50583156  | 1.28E-09 | 2.61E-08  | 1.77E-08 | 2298 | tags=79%, list=11%, signal=70% |
| 0.696286839     | 2.485800035 | 4.93E-09 | 8.25E-08  | 5.57E-08 | 1532 | tags=52%, list=7%, signal=48%  |
| 0.774359506     | 2.439107725 | 2.58E-07 | 3.17E-06  | 2.14E-06 | 1816 | tags=68%, list=9%, signal=62%  |
| 0.703668761     | 2.434773325 | 1.13E-08 | 1.73E-07  | 1.17E-07 | 1455 | tags=53%, list=7%, signal=49%  |
| 0.902818381     | 2.391952314 | 3.01E-08 | 4.26E-07  | 2.87E-07 | 1026 | tags=81%, list=5%, signal=77%  |
| 0.709338585     | 2.325599475 | 4.14E-07 | 4.76E-06  | 3.21E-06 | 2063 | tags=52%, list=10%, signal=47% |
| 0.743080427     | 2.275653714 | 8.36E-06 | 7.70E-05  | 5.19E-05 | 1873 | tags=63%, list=9%, signal=57%  |
| 0.636052208     | 2.234209557 | 3.58E-06 | 3.66E-05  | 2.47E-05 | 1873 | tags=59%, list=9%, signal=54%  |
| 0.67673533      | 2.212433221 | 6.23E-06 | 6.04E-05  | 4.07E-05 | 2298 | tags=46%, list=11%, signal=41% |
| 0.718577072     | 2.200613181 | 2.86E-05 | 0.0002285 | 0.00015  | 1348 | tags=52%, list=7%, signal=49%  |
| 0.752764199     | 2.194873047 | 1.79E-05 | 0.000157  | 0.00011  | 1816 | tags=68%, list=9%, signal=62%  |
| 0.701264387     | 2.173474809 | 3.79E-05 | 0.0002906 | 0.0002   | 3225 | tags=57%, list=16%, signal=48% |
| 0.591038316     | 2.153496931 | 3.38E-06 | 3.66E-05  | 2.47E-05 | 1816 | tags=38%, list=9%, signal=34%  |
| 0.684592294     | 2.149705519 | 2.43E-05 | 0.0002034 | 0.00014  | 582  | tags=32%, list=3%, signal=31%  |
| 0.672052139     | 2.110327861 | 5.33E-05 | 0.000392  | 0.00026  | 2298 | tags=65%, list=11%, signal=58% |
| 0.757644379     | 2.039809237 | 0.000361 | 0.0020132 | 0.00136  | 2095 | tags=47%, list=10%, signal=42% |
| 0.62127775      | 2.031127196 | 0.000115 | 0.0007856 | 0.00053  | 1816 | tags=46%, list=9%, signal=42%  |
| 0.649079204     | 2.011733841 | 0.000429 | 0.0023209 | 0.00157  | 582  | tags=47%, list=3%, signal=45%  |
| 0.577082576     | 1.996770841 | 7.54E-05 | 0.0005334 | 0.00036  | 1773 | tags=45%, list=9%, signal=41%  |
| 0.51169839      | 1.894299896 | 0.00015  | 0.000983  | 0.00066  | 2222 | tags=28%, list=11%, signal=25% |

|              |              |          |           |          |                                     |
|--------------|--------------|----------|-----------|----------|-------------------------------------|
| 0.529661084  | 1.887827873  | 0.000174 | 0.0011014 | 0.00074  | 1645 tags=36%, list=8%, signal=33%  |
| 0.607228746  | 1.810319867  | 0.002841 | 0.012751  | 0.00861  | 1399 tags=58%, list=7%, signal=54%  |
| 0.544636647  | 1.78056643   | 0.001881 | 0.0086528 | 0.00584  | 1399 tags=36%, list=7%, signal=34%  |
| 0.628306485  | 1.770704381  | 0.005887 | 0.0235473 | 0.0159   | 3618 tags=65%, list=18%, signal=54% |
| 0.665263318  | 1.762567274  | 0.007824 | 0.0305146 | 0.0206   | 807 tags=38%, list=4%, signal=36%   |
| 0.570517401  | 1.72671532   | 0.00796  | 0.0305146 | 0.0206   | 1668 tags=54%, list=8%, signal=50%  |
| 0.505467489  | 1.691518725  | 0.004047 | 0.016925  | 0.01143  | 881 tags=25%, list=4%, signal=24%   |
| 0.382956963  | 1.573519429  | 0.001383 | 0.0066966 | 0.00452  | 3020 tags=24%, list=15%, signal=21% |
| -0.412535696 | -1.493985916 | 0.00029  | 0.0016702 | 0.00113  | 4663 tags=35%, list=23%, signal=28% |
| -0.459618292 | -1.494554868 | 0.008456 | 0.0317549 | 0.02144  | 8169 tags=79%, list=40%, signal=48% |
| -0.447748426 | -1.4983352   | 0.005081 | 0.0207776 | 0.01403  | 9637 tags=69%, list=47%, signal=37% |
| -0.537372565 | -1.536481093 | 0.012295 | 0.0452462 | 0.03054  | 2553 tags=45%, list=12%, signal=39% |
| -0.484048951 | -1.555207354 | 0.003483 | 0.0152569 | 0.0103   | 4231 tags=44%, list=21%, signal=35% |
| -0.513676221 | -1.577795467 | 0.003733 | 0.0159746 | 0.01078  | 5320 tags=43%, list=26%, signal=32% |
| -0.490743824 | -1.636592064 | 0.000557 | 0.002927  | 0.00198  | 5554 tags=42%, list=27%, signal=31% |
| -0.546988358 | -1.668129741 | 0.001058 | 0.0052607 | 0.00355  | 5554 tags=53%, list=27%, signal=39% |
| -0.509982735 | -1.676812586 | 0.000284 | 0.0016702 | 0.00113  | 5797 tags=53%, list=28%, signal=38% |
| -0.603936721 | -1.704712566 | 0.001871 | 0.0086528 | 0.00584  | 4027 tags=53%, list=20%, signal=43% |
| -0.686129063 | -1.759340902 | 0.000762 | 0.0038932 | 0.00263  | 1982 tags=38%, list=10%, signal=34% |
| -0.637161836 | -1.78934473  | 0.000274 | 0.0016702 | 0.00113  | 4515 tags=66%, list=22%, signal=51% |
| -0.576708489 | -1.947909513 | 4.41E-08 | 5.80E-07  | 3.91E-07 | 4163 tags=47%, list=20%, signal=37% |

core\_enrichment

SERPINC1/MASP2/C6/F9/C7/C8A/F13B/KNG1/F12/PLG/F11/KLKB1/C4BPA/MBL2/C8B/FGA/MASP1/CPB2/SERPIND1/FGB/FGG/SERPINF2/F7/SERPINA5/C1S  
CYP2A6/CYP3A4/CYP2A7/CYP1A2/ADH4/CYP2C8/ADH1C/CYP2A13/ADH1B/CYP2C9/UGT1A4/CYP1A1/CYP4A22/CYP4A11/UGT2B10/UGT2B15/CYP2B6/UGT  
CYP2A6/CYP3A4/CYP2A7/CYP1A2/ADH4/CYP2C8/ADH1C/CYP2A13/ADH1B/CYP2C9/UGT1A4/GSTM1/UGT2B10/UGT2B15/CYP2B6/UGT1A3/ADH1A/GSTA1/  
ADH4/ADH1C/ADH1B/CYP4A22/ACADL/CYP4A11/ADH1A/EHHADH/ALDH2/ACSL1/ADH6/GCDH/ACADSB/ACAT1/ALDH7A1/ACAA2/ECHS1/ACSL6/ACSL5/HA  
HAO2/AGXT/DAO/HAO1/SLC27A2/XDH/EHHADH/EPHX2/BAAT/ACSL1/PIPOX/PEX11G/ACOX2/SCP2/PXMP2/PHYH/CAT/MLYCD/ACSL6/PECR/ACSL5/ACOX1,  
CYP3A4/CYP1A2/ADH4/CYP2C8/ADH1C/ADH1B/CYP2C9/UGT1A4/CYP1A1/GSTM1/UGT2B10/UGT2B15/CYP2B6/UGT1A3/ADH1A/GSTA1/CYP3A43/GSTA2/L  
GNMT/SDS/BHMT/CTH/AGXT/DAO/DMGDH/AGXT2/SHMT1/PIPOX/SARDH/ALAS1/CBS/GLYCK/GATM/GAMT/GCAT/MAOB/SRR/AOC3/MAOA  
CYP1A2/CYP1A1/OGDHL/KMO/ACMSD/EHHADH/AOX1/ALDH2/HAAO/TDO2/GCDH/IDO2/AADAT/CAT/ACAT1/INMT/ALDH7A1/ECHS1/HADH/ALDH9A1/ALC  
CYP8B1/SLC27A5/FABP4/PCK1/APOA5/CYP4A22/ACADL/CYP7A1/CYP4A11/APOC3/SLC27A2/PCK2/EHHADH/HMGCS2/ACSL1/ANGPTL4/ACOX2/APOA1/SCP  
ABAT/ALDH6A1/EHHADH/AOX1/HMGCS2/ALDH2/ACADSB/ACAT1/ALDH7A1/IVD/ACAA2/ECHS1/BCKDHB/HADH/MCEE/ACAA1/ACADM/PCCB/BCKDHA/HIB  
CYP3A4/HSD11B1/AKR1D1/HSD17B6/UGT1A4/CYP1A1/CYP7A1/UGT2B10/UGT2B15/UGT1A3/SRD5A2/CYP3A43/UGT2B7/CYP11A1/CYP3A5/UGT1A1/CYP3  
ABAT/ALDH6A1/EHHADH/ALDH2/ACAT1/ALDH7A1/MLYCD/ECHS1/MCEE/ACADM/SUCLG2/PCCB/ACACB/HIBCH/ALDH9A1/ALDH3A2/LDHC/ACSS3/ACSS2/P  
CYP2A6/CYP3A4/CYP2A7/CYP2A13/UGT1A4/UPB1/UGT2B10/UGT2B15/UGT1A3/NAT2/CYP3A43/XDH/UPP2/CES2/UGT2B7/CYP3A5/DPYS/UGT1A1/CYP3A7  
CYP8B1/SLC27A5/AKR1D1/CYP7A1/CYP39A1/BAAT/ACOX2/SCP2/CYP27A1/AKR1C4/HSD17B4/AMACR/CH25H  
TAT/ADH4/ADH1C/HPD/ADH1B/ADH1A/AOX1/HGD/GOT2/ADH6/GSTZ1/GOT1/DBH/PNMT/FAH/MAOB/ADH7/ALDH1A3/AOC3/MAOA/ADH5  
UROC1/CNDP1/FTCD/AMDHD1/ALDH2/HDC/ACY3/ALDH7A1/ASPA/HAL/ALDH9A1/HNMT/ALDH3A2/MAOB/ALDH1A3/ALDH1B1/MAOA  
CPS1/GLS2/PRODH/OTC/DAO/ARG1/ALDH2/GOT2/NAGS/ASL/ASS1/ALDH7A1/GOT1/GATM/ACY1/GAMT/ALDH9A1/NOS2/PRODH2/SAT1/ALDH4A1/ALDH3  
AASS/OGDHL/EHHADH/ALDH2/PIPOX/GCDH/AADAT/ACAT1/ALDH7A1/ECHS1/HADH/BBOX1/ALDH9A1/ALDH3A2/SETD7/ALDH1B1/DLST/ACAT2  
CYP3A4/CYP1A2/CYP2C8/CYP2C9/CYP3A43/CYP3A5/CYP2E1/CYP2C19/CYP3A7/CYP2J2/PLA2G2A/PLA2G12B/PLA2G5/CYP2C18  
CNDP1/UPB1/ABAT/EHHADH/ALDH2/DPYS/ALDH7A1/MLYCD/ECHS1/ACADM/HIBCH/ALDH9A1/ALDH3A2/AOC3/ALDH1B1  
PCK1/OGDHL/PCK2/PC/ACO1/SUCLG2/FH/SDHD/SDHA/SDHB/DLST/IDH2/SDHC/DLD/OGDH/SUCLG1/MDH2  
ADH4/ADH1C/ADH1B/PCK1/ALDOB/G6PC/ADH1A/FBP1/GCK/PCK2/ALDH2/ADH6/ALDH7A1/PKLR/ENO3/ALDH9A1/PGM1/ALDH3A2/LDHC/ADH7/ACSS2/AI  
TAT/SDS/BHMT/CTH/CDO1/DNMT3L/GOT2/MAT1A/ADI1/CBS/GOT1  
ACSM2A/ACSM5/ABAT/EHHADH/HMGCS2/ALDH2/BDH1/ACAT1/ALDH5A1/ACSM3/ALDH7A1/ECHS1/ACSM1/HADH/ALDH9A1/HMGCL/ACADS/ALDH3A2/A  
REN/ACE2/MME/ENPEP/CTSG/AGTR1/CMA1/ANPEP  
PCK1/ACOT12/PCK2/LDHD/ALDH2/HAGH/ACAT1/ALDH7A1/GRHPR/PKLR/PC/ACYP2/ACACB/ALDH9A1/ALDH3A2/LDHC/ACSS2/ALDH1B1  
CPS1/GLS2/AGXT/GPT2/ABAT/AGXT2/GPT/GOT2/ASL/ALDH5A1/ASS1/ACY3/ASPA/GOT1  
GYS2/UGT1A4/G6PC/GBA3/UGT2B10/UGT2B15/UGT1A3/GCK/TREH/UGT2B7/UGT1A1/UGT1A5/UGP2/UGT2B4/AMY2B/PGM1/AGL/UGT1A9/UGT2B28/EN  
PCK1/G6PC/PPARGC1A/LEPR/PCK2/ACSL1/SLC2A4/ACSL6/PRKAG2/ACSL5/IRS2/ACACB/CPT1A/IRS1/PPARA/RXRA/ADIPOR2/CD36/AGRP

CYP2C8/CYP2C9/CYP4F2/CYP4A22/CYP4A11/CYP2B6/CYP4F3/EPHX2/CYP2E1/CYP2C19/CYP2J2/PLA2G2A/PLA2G12B/PLA2G5/GGT5/CYP2C18/LTC4S/CYP2U  
UGT1A4/UGT2B10/UGT2B15/UGT1A3/UGT2B7/ALDH2/UGT1A1/ALDH7A1/UGT1A5/UGT2B4/ALDH9A1/UGT1A9/ALDH3A2/UGT2B28  
UGT1A4/UGT2B10/UGT2B15/UGT1A3/UGT2B7/UGT1A1/ALAS1/ALAD/UGT1A5/UGT2B4/UGT1A9/CP/BLVRB/UGT2B28  
BAAT/PECR/ACOX1/ACAA1/ACOT2/ACOT1/ELOVL6/ELOVL2/ACOT4/ACOX3/HSD17B12/HADHA/TECR  
HAO2/HAO1/MTHFD1/GRHPR/GLYCTK/ACO1  
UGT1A4/UGT2B10/UGT2B15/UGT1A3/DCXR/UGT2B7/UGT1A1/CRYL1/UGT1A5/UGP2/UGT2B4/UGT1A9/UGT2B28/XYLB  
ABCA8/ABCB11/ABCB4/ABCA6/ABCA9/ABCG2/ABCG8/ABCC9/ABCG5/ABCC6/ABCC11  
GYS2/PCK1/G6PC/FBP1/PPARGC1A/GCK/PCK2/SOCS2/SLC2A4/PKLR/PRKAG2/IRS2/FOXO1/PIK3R1/PPP1R3B/PDE3B/ACACB/IRS1/INSR/PYGL/LIPE/CALML3/  
AMH/CCL3L3/IL23R/CD40LG/IL22RA2/PF4V1/TNFRSF12A/XCL2/CXCR6/CCL22/KITLG/CCR1/IL2RB/CCR4/CCL5/CCL13/CSF2RB/IL11/IL20RB/CSF1R/TNFRSF13  
RPL11/RPL15/RPL36/RPL31/RPL10/RPL21/RPL22/RPLP1/RPS15/RPS9/RPL10A/RPS3A/RPL12/RPL24/RPS11/RPL19/RPL4/RPL30/MRPL13/RPS17/RPL37A/RPS  
THOC3/SF3B2/SART1/SF3B3/DDX46/TRA2B/SF3B5/SF3B1/CRNKL1/RBM8A/PRPF4/TRA2A/SNRPD3/HNRNPC/SMNDC1/PRPF40A/PPIE/CCDC12/RBM25/PRP  
MAPK3/NRAS/VEGFA/RASSF1/HRAS/MYC/PGF/THBS1/CDK4/CDKN2A/FGFR3/E2F3/VEGFB/E2F1/EGF/E2F2/MMP1/MMP9  
MS4A1/TFRC/KITLG/CD33/IL11/CSF1R/CR1/ITGA4/CD5/CD8A/CD1E/CD37/CD3E/ITGA3/CD44/CD3G/TNF/CD2/CSF1/CD22/CD8B/CD1B/CSF2RA/IL1B/CD19/  
NOD1/NLRC4/CASP8/MAPK3/CARD6/HSP90AB1/NAIP/CCL5/CCL13/PYDC1/NLRP3/CARD18/TNFAIP3/MAPK12/CASP5/TNF/NOD2/BIRC3/RIPK2/PSTPIP1/IL1  
PTPN6/PLCG1/PIK3R5/IL10/MAPK3/NRAS/CD40LG/HRAS/PIK3CG/CD28/LCP2/ZAP70/PRKCQ/PAK4/PTPRC/NFATC2/MAP3K8/LAT/VAV3/CBL/CD8A/CHP2/LC  
PTPN6/IRAK1/IL10/MAPK3/FCGR2C/IL1A/FCGR3B/STAT1/CR1/TGFB2/ITGA4/FCGR3A/PRKCB/MAPK12/FCGR2A/TLR2/TNF/ITGB2/NCF4/IFNGR2/TGFB1/IFN  
CFL1/ARPC2/DNM1L/PIP5K1B/PLCG1/LYN/PIK3R5/MAPK3/WAS/PIP5K1C/LIMK2/FCGR2C/PRKCG/ARPC4/PIK3CG/PLA2G6/INPP5D/ARPC3/WASF2/PLA2G4A  
PCNA/RFC3/LIG1/POLA2/PRIM2/DNA2/MCM5/POLE2/POLA1/RNASEH2A/FEN1/MCM7/PRIM1/POLD1/MCM3/MCM6/RFC4/MCM4/MCM2  
XRCC3/RAD54B/POLD1/BRCA2/EME1/XRCC2/BLM/RAD51/RAD54L  
CD40LG/AICDA/RFXANK/ZAP70/RFXAP/TNFRSF13C/PTPRC/CD8A/LCK/TAP1/BTK/CIITA/CD3E/ADA/TNFRSF13B/DCLRE1C/CD8B/CD79A/JAK3/CD19/ICOS/IL2  
CCND2/RAD21/PCNA/CDKN2B/CDK2/HDAC2/CDKN2D/ANAPC7/MYC/CDKN2C/TGFB2/PTTG2/SKP2/CDC14A/PRKDC/DBF4/MCM5/YWHAZ/TGFB1/MCM7/C

/SERPING1/F2/CFH/C4BPB/C3/CFB/PROC/C1R/VWF/F8/F5/C2/CFI/F10/C8G/A2M/THBD/C5/PROS1  
1A3/ADH1A/CYP3A43/RDH16/UGT2B7/CYP3A5/CYP2C19/RDH5/UGT1A1/ADH6/CYP3A7/CYP26A1/UGT1A5/DGAT2/UGT2B4/DHRS4/ALDH1A1/DHRS4L2/U  
/CYP3A43/GSTA2/FMO3/UGT2B7/AOX1/CYP2D6/CYP3A5/FMO4/CYP2E1/GSTM2/CYP2C19/UGT1A1/ADH6/CYP3A7/GSTZ1/FMO2/FMO5/UGT1A5/MGST1/G  
.DH/ACOX1/ACAA1/ACADM/CPT1A/ALDH9A1/ACADS/CPT2/ALDH3A2/ADH7/ALDH1B1/HADHB/ADH5  
/HSD17B4/ACAA1/AMACR/SOD1/DHRS4/NOS2/HMGCL/DECR2/PAOX/CRAT/GSTK1/ECH1/PEX19/PEX11A/IDH2/PEX1/PEX7/NUDT12/PEX12/HACL1/PEX14/I  
JGT2B7/CYP3A5/CYP2E1/GSTM2/CYP2C19/UGT1A1/ADH6/EPHX1/CYP3A7/GSTZ1/UGT1A5/AKR1C4/MGST1/GSTM5/UGT2B4/UGT1A9/CYP2C18/MGST2/UC

2/CYP27A1/ACSL6/ACSL5/ACOX1/APOA2/AQP7/ACAA1/ACADM/CPT1A/PLIN1/CPT2/FABP1/PPARA  
ICH/ALDH9A1/HMGCL/ACADS/HIBADH/DBT/ALDH3A2/HSD17B10/MCCC2/PCCA/ALDH1B1/HADHB/ACAD8/AUH/ACAT2  
A7/SRD5A1/HSD17B8/HSD3B1/UGT1A5/AKR1C4/CYP17A1/UGT2B4/HSD17B2/UGT1A9/UGT2B28/HSD3B2

SORBS1/PIK3R3/PRKACA/CBLC/CALML6/SHC4/CRK/G6PC2/PHKG1/PRKCZ/PHKB  
C/CRLF2/CCR2/IL15RA/TGFB2/TNFSF4/TNFRSF25/CCL17/CXCL9/CCL3L1/TNFRSF17/TNFSF13B/BMP7/OSMR/CXCR5/CXCR4/TNFRSF8/TNF/CCR5/TNFRSF13B,  
16/RPL27A/RPL38/RPS6/RPL29/RPS12/RPS27/RPS18/RPL35/RPL18A/RPL37/RPS20/RPL17/RPL7A/RPL32/RPL14/RPS24/RPLP2/RPS23/RPL18/RPS4X/RPL5/RP  
F19/SNRNP200/U2AF1/PQBP1/PHF5A/DDX23/EIF4A3/DHX15/USP39/BUD31/HNRNPM/MAGOH/TXNL4A/PRPF31/PRPF6/SF3A3/HSPA2/ISY1/ACIN1/SNRPG,

CK/PIK3R2/MAPK12/CD3E/PAK1/RASGRP1/CD3G/NFATC4/TNF/CD8B/PIK3CD/CDK4/VAV1/IFNG/NCK2/NFKBIE/CARD11/ICOS/CD3D/PDCD1/PAK6/CTLA4/M,  
V/PTPRC/FCGR3A/LAT/VAV3/PIK3R2/PRKCB/PLA2G4D/FCGR2A/PAK1/VASP/WASF1/ARPC1B/HCK/DOCK2/PIK3CD/VAV1/PLA2G4F/RAC2/ASAP1/MARCKSL1/

DK4/CDKN2A/MCM3/CDC25B/E2F3/RBL1/SMC1B/MCM6/CHEK1/CCNE2/MCM4/CCNA2/ESPL1/CDC7/MAD2L1/E2F5/E2F1/MCM2/PKMYT1/CCNE1/CDC6/C

STM5/UGT2B4/UGT1A9/CYP2C18/MGST2/UGT2B28/MAOB/GSTK1/ADH7/ALDH1A3/GSTO1/MAOA



/CXCR3/CCL4L2/IL12RB1/CSF1/IFNGR2/TGFB1/CLCF1/IL15/CXCL13/CCR10/TNFRSF10C/EDA/CD70/CCR8/IFNG/TNFRSF4/LTA/OSM/CCL28/CSF2RA/RELT/IL1B  
S10/RPS27A/RPL6/RPL13A/RPL28/RPS2/RPL39/RPL23A/RPL35A/RPS19/RPL7/RPL23/RPS5/RPL27/RPS7/RPS21/RPLP0/RPS3/RPS8/RPL22L1/RPSA/RPL8/RPL9  
/PRPF38B/RBM17/PUF60/SNRNP70/SNRNP40/HNRNPU/LSM4/LSM7/RBMX/PRPF38A/HNRNPA1L2/THOC2/THOC1/HNRNPA1/SNRPB2/HSPA1B/PRPF40B/PI

DC25A/E2F2/CDK1/CDC45/CCNB1/CDC25C/PTTG1/CCNB2/PLK1/SFN/BUB1B/BUB1/TTK/CDC20



IL18/VEGFB/CCR6/CD27/IL2RG/TNFRSF11B/CCL26/XCL1/CSF3R/IL12A/IL2RA/TNFSF15/TNFSF9/LTB/IL21R/TNFRSF11A/CCR3/TNFRSF9/CXCL6/TNFRSF18/EC  
RPF3/SNRPC/HNRNPA3/SNRPE/PPIL1/EFTUD2/LSM2/U2AF2/TCERG1/SNRPF/PPIH/SNRPA/NCBP2/SNRPA1/SNRPD2/SF3B4/SF3A2/SNRPD1/HSPA6/SNRPB



GF/CXCL3/TNFRSF21/CXCL1/IL20RA/LIF/EPO/CCL20/CXCL5
